# Supplementary material for: Epistatic Analysis of the Contribution of Rabs and Kifs to CATCHR Family Dependent Golgi Organization
Source: Front Cell Dev Biol. 2019 Aug 2;7:126. doi: 10.3389/fcell.2019.00126 (PMC6687757; doi:10.3389/fcell.2019.00126)
Supplement: Supplementary file 2 [file Data_Sheet_2.xls]

## Sheet: Contents
Supplemental Table S5
Lists of pairs of interactors for the protein-protein interaction networks, created and analyzed in this study.
All interaction pairs are provided with the interaction methods (IntAct method IDs), used to identify these interactions.
Sheet	Comment
Full_network	List of all the interactor pairs, used for the "full" network structure in all the PPI networks of Figure 3
Network1	List of interactors of Golgi fragmentation-suppressing Rabs; referring to Figure 3A
Network2	List of interactors of Golgi fragmenting Rabs and Kifs; referring to Figure 3B
Network3	List of interactors of Golgi fragmentation-suppressing Kifs; referring to Figure 3C
Second_deg_network	List of interactor pairs of Golgi fragmentation-suppressing Rabs and their localization-dependent secondary interaction partners; referring to Supplemental Figure S3

## Sheet: Full_network
UniProtA	UniProtB	GeneA	GeneB	Interaction detection method
O95477	P52732	ABCA1	KIF11	psi-mi:MI:0007(anti tag coimmunoprecipitation)
O95477	P52732	ABCA1	KIF11	psi-mi:MI:0007(anti tag coimmunoprecipitation)
O75689	Q9H1H9	ADAP1	KIF13A	psi-mi:MI:0096(pull down)
Q9UJX5	Q8NI77	ANAPC4	KIF18A	psi-mi:MI:0006(anti bait coimmunoprecipitation)
Q9UJX5	Q8NI77	ANAPC4	KIF18A	psi-mi:MI:0006(anti bait coimmunoprecipitation)
Q96NW4	Q12840	ANKRD27	KIF5A	psi-mi:MI:0006(anti bait coimmunoprecipitation)
Q96NW4	Q12840	ANKRD27	KIF5A	psi-mi:MI:0007(anti tag coimmunoprecipitation)
P61966	P61026	AP1S1	RAB10	psi-mi:MI:0006(anti bait coimmunoprecipitation)
O00203	Q9Y496	AP3B1	KIF3A	psi-mi:MI:0096(pull down)
O00203	Q9Y496	AP3B1	KIF3A	psi-mi:MI:0096(pull down)
Q9UKG1	Q9UL26	APPL1	RAB22A	psi-mi:MI:0096(pull down)
P62330	Q02241	ARF6	KIF23	psi-mi:MI:0096(pull down)
P62330	Q02241	ARF6	KIF23	psi-mi:MI:0096(pull down)
P62330	P62820	ARF6	RAB1A	psi-mi:MI:0114(x-ray crystallography)
Q9Y6D6	Q7Z4S6	ARFGEF1	KIF21A	psi-mi:MI:0006(anti bait coimmunoprecipitation)
Q9Y6D6	Q7Z4S6	ARFGEF1	KIF21A	psi-mi:MI:0006(anti bait coimmunoprecipitation)
Q9Y6D6	Q7Z4S6	ARFGEF1	KIF21A	psi-mi:MI:0006(anti bait coimmunoprecipitation)
O15013	O15066	ARHGEF10	KIF3B	psi-mi:MI:0007(anti tag coimmunoprecipitation)
Q8IUR7	P61006	ARMC8	RAB8A	psi-mi:MI:0676(tandem affinity purification)
P49407	Q9ULI4	ARRB1	KIF26A	psi-mi:MI:0007(anti tag coimmunoprecipitation)
P49407	Q99661	ARRB1	KIF2C	psi-mi:MI:0007(anti tag coimmunoprecipitation)
P49407	Q9Y496	ARRB1	KIF3A	psi-mi:MI:0007(anti tag coimmunoprecipitation)
P49407	P62820	ARRB1	RAB1A	psi-mi:MI:0007(anti tag coimmunoprecipitation)
Q8IZT6	O00139	ASPM	KIF2A	psi-mi:MI:0096(pull down)
Q8IZT6	Q9BW19	ASPM	KIFC1	psi-mi:MI:0096(pull down)
P15336	P62491	ATF2	RAB11A	psi-mi:MI:0007(anti tag coimmunoprecipitation)
P15336	P61106	ATF2	RAB14	psi-mi:MI:0007(anti tag coimmunoprecipitation)
P15336	P61019	ATF2	RAB2A	psi-mi:MI:0007(anti tag coimmunoprecipitation)
Q6ZNE5	Q14964	ATG14	RAB39A	psi-mi:MI:0007(anti tag coimmunoprecipitation)
A0AUL9	P62820	ATG2A	RAB1A	psi-mi:MI:0007(anti tag coimmunoprecipitation)
Q6DD88	P61106	ATL3	RAB14	psi-mi:MI:0007(anti tag coimmunoprecipitation)
Q6DD88	P62820	ATL3	RAB1A	psi-mi:MI:0007(anti tag coimmunoprecipitation)
O75787	P61106	ATP6AP2	RAB14	psi-mi:MI:0007(anti tag coimmunoprecipitation)
P38606	Q9UL26	ATP6V1A	RAB22A	psi-mi:MI:0006(anti bait coimmunoprecipitation)
Q8NFJ9	P61006	BBS1	RAB8A	psi-mi:MI:0676(tandem affinity purification)
P56945	Q12756	BCAR1	KIF1A	psi-mi:MI:0006(anti bait coimmunoprecipitation)
P56945	Q12756	BCAR1	KIF1A	psi-mi:MI:0006(anti bait coimmunoprecipitation)
P56945	O60333	BCAR1	KIF1B	psi-mi:MI:0006(anti bait coimmunoprecipitation)
P56945	O60333	BCAR1	KIF1B	psi-mi:MI:0006(anti bait coimmunoprecipitation)
P56945	O43896	BCAR1	KIF1C	psi-mi:MI:0006(anti bait coimmunoprecipitation)
P56945	O43896	BCAR1	KIF1C	psi-mi:MI:0006(anti bait coimmunoprecipitation)
P41182	Q9NQT8	BCL6	KIF13B	psi-mi:MI:0006(anti bait coimmunoprecipitation)
Q14457	Q14964	BECN1	RAB39A	psi-mi:MI:0007(anti tag coimmunoprecipitation)
Q9NR09	Q02241	BIRC6	KIF23	psi-mi:MI:0006(anti bait coimmunoprecipitation)
Q9NR09	Q02241	BIRC6	KIF23	psi-mi:MI:0007(anti tag coimmunoprecipitation)
O43683	Q2KJY2	BUB1	KIF26B	psi-mi:MI:0007(anti tag coimmunoprecipitation)
O60566	Q02224	BUB1B	CENPE	psi-mi:MI:0006(anti bait coimmunoprecipitation)
O60566	Q02224	BUB1B	CENPE	psi-mi:MI:0006(anti bait coimmunoprecipitation)
O60566	Q02224	BUB1B	CENPE	psi-mi:MI:0007(anti tag coimmunoprecipitation)
Q96LT7	P62820	C9orf72	RAB1A	psi-mi:MI:0007(anti tag coimmunoprecipitation)
Q96LT7	P62820	C9orf72	RAB1A	psi-mi:MI:0007(anti tag coimmunoprecipitation)
Q96LT7	P62820	C9orf72	RAB1A	psi-mi:MI:0096(pull down)
Q96LT7	P62820	C9orf72	RAB1A	psi-mi:MI:0096(pull down)
Q96LT7	P62820	C9orf72	RAB1A	psi-mi:MI:0096(pull down)
Q13557	O14782	CAMK2D	KIF3C	psi-mi:MI:0007(anti tag coimmunoprecipitation)
P07384	Q8WTW3	CAPN1	COG1	psi-mi:MI:0007(anti tag coimmunoprecipitation)
P47755	P62820	CAPZA2	RAB1A	psi-mi:MI:0007(anti tag coimmunoprecipitation)
Q14781	Q02224	CBX2	CENPE	psi-mi:MI:0676(tandem affinity purification)
O95503	Q96Q89	CBX6	KIF20B	psi-mi:MI:0676(tandem affinity purification)
Q9HC52	Q96Q89	CBX8	KIF20B	psi-mi:MI:0676(tandem affinity purification)
Q49A88	Q15058	CCDC14	KIF14	psi-mi:MI:0007(anti tag coimmunoprecipitation)
O43303	Q5T7B8	CCP110	KIF24	psi-mi:MI:0006(anti bait coimmunoprecipitation)
O43303	Q5T7B8	CCP110	KIF24	psi-mi:MI:0006(anti bait coimmunoprecipitation)
O43303	Q5T7B8	CCP110	KIF24	psi-mi:MI:0006(anti bait coimmunoprecipitation)
O43303	Q5T7B8	CCP110	KIF24	psi-mi:MI:0007(anti tag coimmunoprecipitation)
Q99459	P52732	CDC5L	KIF11	psi-mi:MI:0006(anti bait coimmunoprecipitation)
Q99459	Q7Z4S6	CDC5L	KIF21A	psi-mi:MI:0006(anti bait coimmunoprecipitation)
Q99459	Q99661	CDC5L	KIF2C	psi-mi:MI:0006(anti bait coimmunoprecipitation)
Q99459	O95239	CDC5L	KIF4A	psi-mi:MI:0006(anti bait coimmunoprecipitation)
Q02224	Q9BZD4	CENPE	NUF2	psi-mi:MI:0006(anti bait coimmunoprecipitation)
Q02224	Q9BZD4	CENPE	NUF2	psi-mi:MI:0006(anti bait coimmunoprecipitation)
Q02224	Q9NS39	CENPE	ADARB2	psi-mi:MI:0007(anti tag coimmunoprecipitation)
Q02224	Q9UPN4	CENPE	CEP131	psi-mi:MI:0007(anti tag coimmunoprecipitation)
Q02224	O75122	CENPE	CLASP2	psi-mi:MI:0007(anti tag coimmunoprecipitation)
Q02224	Q8IVT2	CENPE	MISP	psi-mi:MI:0007(anti tag coimmunoprecipitation)
Q02224	Q96A35	CENPE	MRPL24	psi-mi:MI:0007(anti tag coimmunoprecipitation)
Q02224	Q9BZD4	CENPE	NUF2	psi-mi:MI:0007(anti tag coimmunoprecipitation)
Q02224	O75665	CENPE	OFD1	psi-mi:MI:0007(anti tag coimmunoprecipitation)
Q02224	Q15154	CENPE	PCM1	psi-mi:MI:0007(anti tag coimmunoprecipitation)
Q02224	Q13813	CENPE	SPTAN1	psi-mi:MI:0007(anti tag coimmunoprecipitation)
Q02224	O95425	CENPE	SVIL	psi-mi:MI:0007(anti tag coimmunoprecipitation)
Q02224	Q8N3V7	CENPE	SYNPO	psi-mi:MI:0007(anti tag coimmunoprecipitation)
Q02224	Q9BZD4	CENPE	NUF2	psi-mi:MI:0096(pull down)
Q96L14	Q9BVG8	CEP170P1	KIFC3	psi-mi:MI:0676(tandem affinity purification)
O15078	Q2M1P5	CEP290	KIF7	psi-mi:MI:0007(anti tag coimmunoprecipitation)
O15078	P61006	CEP290	RAB8A	psi-mi:MI:0007(anti tag coimmunoprecipitation)
Q8TAP6	Q5T7B8	CEP76	KIF24	psi-mi:MI:0006(anti bait coimmunoprecipitation)
Q8IW35	Q5T7B8	CEP97	KIF24	psi-mi:MI:0006(anti bait coimmunoprecipitation)
Q8IW35	Q5T7B8	CEP97	KIF24	psi-mi:MI:0006(anti bait coimmunoprecipitation)
Q8IW35	Q5T7B8	CEP97	KIF24	psi-mi:MI:0006(anti bait coimmunoprecipitation)
Q8IW35	Q5T7B8	CEP97	KIF24	psi-mi:MI:0007(anti tag coimmunoprecipitation)
P13569	P62491	CFTR	RAB11A	psi-mi:MI:0006(anti bait coimmunoprecipitation)
Q7Z460	O60333	CLASP1	KIF1B	psi-mi:MI:0006(anti bait coimmunoprecipitation)
Q7Z460	O60333	CLASP1	KIF1B	psi-mi:MI:0007(anti tag coimmunoprecipitation)
Q14746	Q9H9E3	COG2	COG4	psi-mi:MI:0019(coimmunoprecipitation)
Q14746	Q9H9E3	COG2	COG4	psi-mi:MI:0019(coimmunoprecipitation)
Q96JB2	Q9H9E3	COG3	COG4	psi-mi:MI:0006(anti bait coimmunoprecipitation)
Q96JB2	Q9H9E3	COG3	COG4	psi-mi:MI:0006(anti bait coimmunoprecipitation)
Q96JB2	P83436	COG3	COG7	psi-mi:MI:0006(anti bait coimmunoprecipitation)
Q96JB2	P83436	COG3	COG7	psi-mi:MI:0006(anti bait coimmunoprecipitation)
Q96JB2	Q96MW5	COG3	COG8	psi-mi:MI:0006(anti bait coimmunoprecipitation)
Q96JB2	Q96MW5	COG3	COG8	psi-mi:MI:0006(anti bait coimmunoprecipitation)
Q96JB2	Q8WVM8	COG3	SCFD1	psi-mi:MI:0006(anti bait coimmunoprecipitation)
Q9H9E3	Q96JB2	COG4	COG3	psi-mi:MI:0006(anti bait coimmunoprecipitation)
Q9H9E3	Q96JB2	COG4	COG3	psi-mi:MI:0006(anti bait coimmunoprecipitation)
Q9H9E3	P83436	COG4	COG7	psi-mi:MI:0006(anti bait coimmunoprecipitation)
Q9H9E3	P83436	COG4	COG7	psi-mi:MI:0006(anti bait coimmunoprecipitation)
Q9H9E3	Q96MW5	COG4	COG8	psi-mi:MI:0006(anti bait coimmunoprecipitation)
Q9H9E3	Q96MW5	COG4	COG8	psi-mi:MI:0006(anti bait coimmunoprecipitation)
Q9H9E3	Q8WVM8	COG4	SCFD1	psi-mi:MI:0006(anti bait coimmunoprecipitation)
Q9H9E3	Q8WVM8	COG4	SCFD1	psi-mi:MI:0007(anti tag coimmunoprecipitation)
Q9H9E3	Q8WVM8	COG4	SCFD1	psi-mi:MI:0007(anti tag coimmunoprecipitation)
Q9H9E3	Q8WTW3	COG4	COG1	psi-mi:MI:0019(coimmunoprecipitation)
Q9H9E3	Q8WTW3	COG4	COG1	psi-mi:MI:0019(coimmunoprecipitation)
Q9H9E3	Q8WTW3	COG4	COG1	psi-mi:MI:0019(coimmunoprecipitation)
Q9H9E3	Q8WTW3	COG4	COG1	psi-mi:MI:0019(coimmunoprecipitation)
Q9H9E3	Q14746	COG4	COG2	psi-mi:MI:0019(coimmunoprecipitation)
Q9H9E3	Q14746	COG4	COG2	psi-mi:MI:0019(coimmunoprecipitation)
Q9H9E3	Q9UP83	COG4	COG5	psi-mi:MI:0019(coimmunoprecipitation)
Q9H9E3	Q9UP83	COG4	COG5	psi-mi:MI:0019(coimmunoprecipitation)
Q9H9E3	P83436	COG4	COG7	psi-mi:MI:0019(coimmunoprecipitation)
Q9H9E3	P83436	COG4	COG7	psi-mi:MI:0019(coimmunoprecipitation)
Q9H9E3	Q8WVM8	COG4	SCFD1	psi-mi:MI:0096(pull down)
Q9H9E3	Q8WVM8	COG4	SCFD1	psi-mi:MI:0096(pull down)
Q9H9E3	Q13190	COG4	STX5	psi-mi:MI:0096(pull down)
Q9UP83	Q9H9E3	COG5	COG4	psi-mi:MI:0019(coimmunoprecipitation)
Q9UP83	Q9H9E3	COG5	COG4	psi-mi:MI:0019(coimmunoprecipitation)
Q9UP83	P83436	COG5	COG7	psi-mi:MI:0019(coimmunoprecipitation)
Q9UP83	P83436	COG5	COG7	psi-mi:MI:0019(coimmunoprecipitation)
Q9Y2V7	Q9H9E3	COG6	COG4	psi-mi:MI:0006(anti bait coimmunoprecipitation)
P83436	Q96JB2	COG7	COG3	psi-mi:MI:0006(anti bait coimmunoprecipitation)
P83436	Q96JB2	COG7	COG3	psi-mi:MI:0006(anti bait coimmunoprecipitation)
P83436	Q9H9E3	COG7	COG4	psi-mi:MI:0006(anti bait coimmunoprecipitation)
P83436	Q9H9E3	COG7	COG4	psi-mi:MI:0006(anti bait coimmunoprecipitation)
P83436	Q96MW5	COG7	COG8	psi-mi:MI:0006(anti bait coimmunoprecipitation)
P83436	Q96MW5	COG7	COG8	psi-mi:MI:0006(anti bait coimmunoprecipitation)
P83436	Q8WVM8	COG7	SCFD1	psi-mi:MI:0006(anti bait coimmunoprecipitation)
P83436	Q9H9E3	COG7	COG4	psi-mi:MI:0019(coimmunoprecipitation)
P83436	Q9H9E3	COG7	COG4	psi-mi:MI:0019(coimmunoprecipitation)
P83436	Q9UP83	COG7	COG5	psi-mi:MI:0019(coimmunoprecipitation)
P83436	Q9UP83	COG7	COG5	psi-mi:MI:0019(coimmunoprecipitation)
P19784	O60282	CSNK2A2	KIF5C	psi-mi:MI:0006(anti bait coimmunoprecipitation)
P19784	O60282	CSNK2A2	KIF5C	psi-mi:MI:0096(pull down)
P67870	O60282	CSNK2B	KIF5C	psi-mi:MI:0006(anti bait coimmunoprecipitation)
Q13620	Q9NS87	CUL4B	KIF15	psi-mi:MI:0007(anti tag coimmunoprecipitation)
Q16643	P62820	DBN1	RAB1A	psi-mi:MI:0007(anti tag coimmunoprecipitation)
Q8WYQ5	Q9NS87	DGCR8	KIF15	psi-mi:MI:0007(anti tag coimmunoprecipitation)
O60610	Q9BZG1	DIAPH1	RAB34	psi-mi:MI:0007(anti tag coimmunoprecipitation)
Q12959	Q9NQT8	DLG1	KIF13B	psi-mi:MI:0006(anti bait coimmunoprecipitation)
Q12959	Q9NQT8	DLG1	KIF13B	psi-mi:MI:0096(pull down)
Q12959	Q9NQT8	DLG1	KIF13B	psi-mi:MI:0096(pull down)
P78352	Q9NQT8	DLG4	KIF13B	psi-mi:MI:0096(pull down)
P63167	Q7Z4S6	DYNLL1	KIF21A	psi-mi:MI:0007(anti tag coimmunoprecipitation)
Q8TF09	Q2M1P5	DYNLRB2	KIF7	psi-mi:MI:0676(tandem affinity purification)
Q9H8V3	Q02241	ECT2	KIF23	psi-mi:MI:0006(anti bait coimmunoprecipitation)
Q15075	Q9UL26	EEA1	RAB22A	psi-mi:MI:0096(pull down)
Q9H6Z9	Q2M1P5	EGLN3	KIF7	psi-mi:MI:0007(anti tag coimmunoprecipitation)
Q9H4M9	P61006	EHD1	RAB8A	psi-mi:MI:0096(pull down)
P11171	P61026	EPB41	RAB10	psi-mi:MI:0006(anti bait coimmunoprecipitation)
Q92731	Q9Y2V7	ESR2	COG6	psi-mi:MI:0676(tandem affinity purification)
Q92731	Q12840	ESR2	KIF5A	psi-mi:MI:0676(tandem affinity purification)
Q8TAG9	P61006	EXOC6	RAB8A	psi-mi:MI:0676(tandem affinity purification)
Q14CZ7	P61106	FASTKD3	RAB14	psi-mi:MI:0676(tandem affinity purification)
Q14CZ7	Q9H0U4	FASTKD3	RAB1B	psi-mi:MI:0676(tandem affinity purification)
Q99853	Q9UP83	FOXB1	COG5	psi-mi:MI:0676(tandem affinity purification)
O00358	Q14807	FOXE1	KIF22	psi-mi:MI:0676(tandem affinity purification)
Q12952	Q9UP83	FOXL1	COG5	psi-mi:MI:0676(tandem affinity purification)
Q12952	Q14807	FOXL1	KIF22	psi-mi:MI:0676(tandem affinity purification)
Q12952	Q6NUQ1	FOXL1	RINT1	psi-mi:MI:0676(tandem affinity purification)
Q08050	Q14807	FOXM1	KIF22	psi-mi:MI:0676(tandem affinity purification)
Q9C009	Q14807	FOXQ1	KIF22	psi-mi:MI:0676(tandem affinity purification)
Q9C009	P33176	FOXQ1	KIF5B	psi-mi:MI:0676(tandem affinity purification)
Q9BQS8	P33176	FYCO1	KIF5B	psi-mi:MI:0007(anti tag coimmunoprecipitation)
Q9H0R8	P62820	GABARAPL1	RAB1A	psi-mi:MI:0007(anti tag coimmunoprecipitation)
Q9H0R8	Q9H082	GABARAPL1	RAB33B	psi-mi:MI:0007(anti tag coimmunoprecipitation)
Q9H0R8	Q14964	GABARAPL1	RAB39A	psi-mi:MI:0007(anti tag coimmunoprecipitation)
O14976	Q9Y496	GAK	KIF3A	psi-mi:MI:0007(anti tag coimmunoprecipitation)
P23771	P52732	GATA3	KIF11	psi-mi:MI:0007(anti tag coimmunoprecipitation)
Q8IWJ2	P20340	GCC2	RAB6A	psi-mi:MI:0004(affinity chromatography technology)
Q8IWJ2	P20340	GCC2	RAB6A	psi-mi:MI:0004(affinity chromatography technology)
Q8IWJ2	P20340	GCC2	RAB6A	psi-mi:MI:0065(isothermal titration calorimetry)
Q8IWJ2	P20340	GCC2	RAB6A	psi-mi:MI:0114(x-ray crystallography)
P31150	P61026	GDI1	RAB10	psi-mi:MI:0007(anti tag coimmunoprecipitation)
P31150	P61106	GDI1	RAB14	psi-mi:MI:0007(anti tag coimmunoprecipitation)
P31150	P62820	GDI1	RAB1A	psi-mi:MI:0007(anti tag coimmunoprecipitation)
P31150	Q9BZG1	GDI1	RAB34	psi-mi:MI:0007(anti tag coimmunoprecipitation)
P31150	P20338	GDI1	RAB4A	psi-mi:MI:0007(anti tag coimmunoprecipitation)
P31150	P61006	GDI1	RAB8A	psi-mi:MI:0007(anti tag coimmunoprecipitation)
P31150	P62820	GDI1	RAB1A	psi-mi:MI:0096(pull down)
P50395	P20338	GDI2	RAB4A	psi-mi:MI:0007(anti tag coimmunoprecipitation)
P50395	P61006	GDI2	RAB8A	psi-mi:MI:0096(pull down)
P08151	Q2M1P5	GLI1	KIF7	psi-mi:MI:0676(tandem affinity purification)
Q9Y3E0	P61006	GOLT1B	RAB8A	psi-mi:MI:0007(anti tag coimmunoprecipitation)
P62993	Q9ULI4	GRB2	KIF26A	psi-mi:MI:0006(anti bait coimmunoprecipitation)
Q9NYZ3	P62820	GTSE1	RAB1A	psi-mi:MI:0007(anti tag coimmunoprecipitation)
Q9NVX0	O75037	HAUS2	KIF21B	psi-mi:MI:0007(anti tag coimmunoprecipitation)
Q13547	Q9H9E3	HDAC1	COG4	psi-mi:MI:0007(anti tag coimmunoprecipitation)
P51858	O00139	HDGF	KIF2A	psi-mi:MI:0676(tandem affinity purification)
P51858	O00139	HDGF	KIF2A	psi-mi:MI:0676(tandem affinity purification)
Q32P51	Q15058	HNRNPA1L2	KIF14	psi-mi:MI:0007(anti tag coimmunoprecipitation)
Q8IWL3	Q12756	HSCB	KIF1A	psi-mi:MI:0006(anti bait coimmunoprecipitation)
P42858	P62491	HTT	RAB11A	psi-mi:MI:0006(anti bait coimmunoprecipitation)
Q7Z6Z7	Q9H1H9	HUWE1	KIF13A	psi-mi:MI:0007(anti tag coimmunoprecipitation)
Q16666	P33176	IFI16	KIF5B	psi-mi:MI:0007(anti tag coimmunoprecipitation)
Q13418	O00139	ILK	KIF2A	psi-mi:MI:0007(anti tag coimmunoprecipitation)
P06213	Q12840	INSR	KIF5A	psi-mi:MI:0006(anti bait coimmunoprecipitation)
P06213	Q12840	INSR	KIF5A	psi-mi:MI:0006(anti bait coimmunoprecipitation)
Q9ULD6	Q9Y496	INTU	KIF3A	psi-mi:MI:0676(tandem affinity purification)
Q15051	P61106	IQCB1	RAB14	psi-mi:MI:0007(anti tag coimmunoprecipitation)
Q15051	P62820	IQCB1	RAB1A	psi-mi:MI:0007(anti tag coimmunoprecipitation)
Q13352	Q8WTW3	ITGB3BP	COG1	psi-mi:MI:0007(anti tag coimmunoprecipitation)
P05412	Q9Y2V7	JUN	COG6	psi-mi:MI:0006(anti bait coimmunoprecipitation)
P05412	O00139	JUN	KIF2A	psi-mi:MI:0006(anti bait coimmunoprecipitation)
P05412	Q12840	JUN	KIF5A	psi-mi:MI:0006(anti bait coimmunoprecipitation)
P05412	P33176	JUN	KIF5B	psi-mi:MI:0006(anti bait coimmunoprecipitation)
P05412	Q9BW19	JUN	KIFC1	psi-mi:MI:0006(anti bait coimmunoprecipitation)
P05412	P61026	JUN	RAB10	psi-mi:MI:0006(anti bait coimmunoprecipitation)
P05412	P62820	JUN	RAB1A	psi-mi:MI:0006(anti bait coimmunoprecipitation)
P05412	P62820	JUN	RAB1A	psi-mi:MI:0006(anti bait coimmunoprecipitation)
P05412	Q9H082	JUN	RAB33B	psi-mi:MI:0006(anti bait coimmunoprecipitation)
P05412	Q9H082	JUN	RAB33B	psi-mi:MI:0006(anti bait coimmunoprecipitation)
Q14678	Q7Z4S6	KANK1	KIF21A	psi-mi:MI:0006(anti bait coimmunoprecipitation)
Q14678	Q7Z4S6	KANK1	KIF21A	psi-mi:MI:0006(anti bait coimmunoprecipitation)
Q14678	Q7Z4S6	KANK1	KIF21A	psi-mi:MI:0007(anti tag coimmunoprecipitation)
Q8IYT4	P52732	KATNAL2	KIF11	psi-mi:MI:0676(tandem affinity purification)
Q8IYT4	Q15058	KATNAL2	KIF14	psi-mi:MI:0676(tandem affinity purification)
Q8IYT4	Q2KJY2	KATNAL2	KIF26B	psi-mi:MI:0676(tandem affinity purification)
O60341	O00139	KDM1A	KIF2A	psi-mi:MI:0096(pull down)
P52732	O95573	KIF11	ACSL3	psi-mi:MI:0007(anti tag coimmunoprecipitation)
P52732	Q9ULC5	KIF11	ACSL5	psi-mi:MI:0007(anti tag coimmunoprecipitation)
P52732	Q9NZ32	KIF11	ACTR10	psi-mi:MI:0007(anti tag coimmunoprecipitation)
P52732	Q9NS39	KIF11	ADARB2	psi-mi:MI:0007(anti tag coimmunoprecipitation)
P52732	Q12955	KIF11	ANK3	psi-mi:MI:0007(anti tag coimmunoprecipitation)
P52732	Q86XL3	KIF11	ANKLE2	psi-mi:MI:0007(anti tag coimmunoprecipitation)
P52732	Q68DC2	KIF11	ANKS6	psi-mi:MI:0007(anti tag coimmunoprecipitation)
P52732	P04083	KIF11	ANXA1	psi-mi:MI:0007(anti tag coimmunoprecipitation)
P52732	O94973	KIF11	AP2A2	psi-mi:MI:0007(anti tag coimmunoprecipitation)
P52732	Q9Y2T2	KIF11	AP3M1	psi-mi:MI:0007(anti tag coimmunoprecipitation)
P52732	Q4LE39	KIF11	ARID4B	psi-mi:MI:0007(anti tag coimmunoprecipitation)
P52732	P55201	KIF11	BRPF1	psi-mi:MI:0007(anti tag coimmunoprecipitation)
P52732	Q8N8R5	KIF11	C2orf69	psi-mi:MI:0007(anti tag coimmunoprecipitation)
P52732	Q05682	KIF11	CALD1	psi-mi:MI:0007(anti tag coimmunoprecipitation)
P52732	Q9C0D2	KIF11	CEP295	psi-mi:MI:0007(anti tag coimmunoprecipitation)
P52732	Q5VT06	KIF11	CEP350	psi-mi:MI:0007(anti tag coimmunoprecipitation)
P52732	P41208	KIF11	CETN2	psi-mi:MI:0007(anti tag coimmunoprecipitation)
P52732	Q8N8A6	KIF11	DDX51	psi-mi:MI:0007(anti tag coimmunoprecipitation)
P52732	Q16698	KIF11	DECR1	psi-mi:MI:0007(anti tag coimmunoprecipitation)
P52732	Q8WYQ5	KIF11	DGCR8	psi-mi:MI:0007(anti tag coimmunoprecipitation)
P52732	Q6UX07	KIF11	DHRS13	psi-mi:MI:0007(anti tag coimmunoprecipitation)
P52732	O75319	KIF11	DUSP11	psi-mi:MI:0007(anti tag coimmunoprecipitation)
P52732	Q9NP97	KIF11	DYNLRB1	psi-mi:MI:0007(anti tag coimmunoprecipitation)
P52732	Q6P2E9	KIF11	EDC4	psi-mi:MI:0007(anti tag coimmunoprecipitation)
P52732	Q14152	KIF11	EIF3A	psi-mi:MI:0007(anti tag coimmunoprecipitation)
P52732	Q13347	KIF11	EIF3I	psi-mi:MI:0007(anti tag coimmunoprecipitation)
P52732	Q96E09	KIF11	FAM122A	psi-mi:MI:0007(anti tag coimmunoprecipitation)
P52732	P49327	KIF11	FASN	psi-mi:MI:0007(anti tag coimmunoprecipitation)
P52732	P49327	KIF11	FASN	psi-mi:MI:0007(anti tag coimmunoprecipitation)
P52732	Q4VC44	KIF11	FLYWCH1	psi-mi:MI:0007(anti tag coimmunoprecipitation)
P52732	Q9BZE4	KIF11	GTPBP4	psi-mi:MI:0007(anti tag coimmunoprecipitation)
P52732	K7EK07	KIF11	H3F3B	psi-mi:MI:0007(anti tag coimmunoprecipitation)
P52732	K7EK07	KIF11	H3F3B	psi-mi:MI:0007(anti tag coimmunoprecipitation)
P52732	Q00341	KIF11	HDLBP	psi-mi:MI:0007(anti tag coimmunoprecipitation)
P52732	O60814	KIF11	HIST1H2BK	psi-mi:MI:0007(anti tag coimmunoprecipitation)
P52732	P68431	KIF11	HIST1H3A	psi-mi:MI:0007(anti tag coimmunoprecipitation)
P52732	P68431	KIF11	HIST1H3A	psi-mi:MI:0007(anti tag coimmunoprecipitation)
P52732	Q9UJY1	KIF11	HSPB8	psi-mi:MI:0007(anti tag coimmunoprecipitation)
P52732	A1L0T0	KIF11	ILVBL	psi-mi:MI:0007(anti tag coimmunoprecipitation)
P52732	Q9NWZ3	KIF11	IRAK4	psi-mi:MI:0007(anti tag coimmunoprecipitation)
P52732	Q03164	KIF11	KMT2A	psi-mi:MI:0007(anti tag coimmunoprecipitation)
P52732	P07942	KIF11	LAMB1	psi-mi:MI:0007(anti tag coimmunoprecipitation)
P52732	P00338	KIF11	LDHA	psi-mi:MI:0007(anti tag coimmunoprecipitation)
P52732	Q86V48	KIF11	LUZP1	psi-mi:MI:0007(anti tag coimmunoprecipitation)
P52732	E7EVA0	KIF11	MAP4	psi-mi:MI:0007(anti tag coimmunoprecipitation)
P52732	O60244	KIF11	MED14	psi-mi:MI:0007(anti tag coimmunoprecipitation)
P52732	O60244	KIF11	MED14	psi-mi:MI:0007(anti tag coimmunoprecipitation)
P52732	Q9BVC4	KIF11	MLST8	psi-mi:MI:0007(anti tag coimmunoprecipitation)
P52732	D6RAN8	KIF11	MRPL27	psi-mi:MI:0007(anti tag coimmunoprecipitation)
P52732	Q9ULD2	KIF11	MTUS1	psi-mi:MI:0007(anti tag coimmunoprecipitation)
P52732	O00159	KIF11	MYO1C	psi-mi:MI:0007(anti tag coimmunoprecipitation)
P52732	Q9UMY1	KIF11	NOL7	psi-mi:MI:0007(anti tag coimmunoprecipitation)
P52732	Q14978	KIF11	NOLC1	psi-mi:MI:0007(anti tag coimmunoprecipitation)
P52732	Q86UY8	KIF11	NT5DC3	psi-mi:MI:0007(anti tag coimmunoprecipitation)
P52732	Q13416	KIF11	ORC2	psi-mi:MI:0007(anti tag coimmunoprecipitation)
P52732	Q5JVF3	KIF11	PCID2	psi-mi:MI:0007(anti tag coimmunoprecipitation)
P52732	Q14432	KIF11	PDE3A	psi-mi:MI:0007(anti tag coimmunoprecipitation)
P52732	P08237	KIF11	PFKM	psi-mi:MI:0007(anti tag coimmunoprecipitation)
P52732	Q9HAU0	KIF11	PLEKHA5	psi-mi:MI:0007(anti tag coimmunoprecipitation)
P52732	Q9UL41	KIF11	PNMA3	psi-mi:MI:0007(anti tag coimmunoprecipitation)
P52732	P17252	KIF11	PRKCA	psi-mi:MI:0007(anti tag coimmunoprecipitation)
P52732	P79522	KIF11	PRR3	psi-mi:MI:0007(anti tag coimmunoprecipitation)
P52732	Q9NW13	KIF11	RBM28	psi-mi:MI:0007(anti tag coimmunoprecipitation)
P52732	Q8IUH3	KIF11	RBM45	psi-mi:MI:0007(anti tag coimmunoprecipitation)
P52732	P62750	KIF11	RPL23A	psi-mi:MI:0007(anti tag coimmunoprecipitation)
P52732	P46779	KIF11	RPL28	psi-mi:MI:0007(anti tag coimmunoprecipitation)
P52732	P62910	KIF11	RPL32	psi-mi:MI:0007(anti tag coimmunoprecipitation)
P52732	Q969Q0	KIF11	RPL36AL	psi-mi:MI:0007(anti tag coimmunoprecipitation)
P52732	P61513	KIF11	RPL37A	psi-mi:MI:0007(anti tag coimmunoprecipitation)
P52732	P62266	KIF11	RPS23	psi-mi:MI:0007(anti tag coimmunoprecipitation)
P52732	P61247	KIF11	RPS3A	psi-mi:MI:0007(anti tag coimmunoprecipitation)
P52732	P62753	KIF11	RPS6	psi-mi:MI:0007(anti tag coimmunoprecipitation)
P52732	P62318	KIF11	SNRPD3	psi-mi:MI:0007(anti tag coimmunoprecipitation)
P52732	Q86XZ4	KIF11	SPATS2	psi-mi:MI:0007(anti tag coimmunoprecipitation)
P52732	Q8WWL2	KIF11	SPIRE2	psi-mi:MI:0007(anti tag coimmunoprecipitation)
P52732	O43463	KIF11	SUV39H1	psi-mi:MI:0007(anti tag coimmunoprecipitation)
P52732	Q9Y490	KIF11	TLN1	psi-mi:MI:0007(anti tag coimmunoprecipitation)
P52732	H0Y2M0	KIF11	TMEM131L	psi-mi:MI:0007(anti tag coimmunoprecipitation)
P52732	Q15650	KIF11	TRIP4	psi-mi:MI:0007(anti tag coimmunoprecipitation)
P52732	Q86YA3	KIF11	ZGRF1	psi-mi:MI:0007(anti tag coimmunoprecipitation)
P52732	Q15776	KIF11	ZKSCAN8	psi-mi:MI:0007(anti tag coimmunoprecipitation)
P52732	Q14164	KIF11	IKBKE	psi-mi:MI:0676(tandem affinity purification)
Q9NQT8	O75689	KIF13B	ADAP1	psi-mi:MI:0065(isothermal titration calorimetry)
Q9NQT8	O75689	KIF13B	ADAP1	psi-mi:MI:0096(pull down)
Q9NQT8	O75689	KIF13B	ADAP1	psi-mi:MI:0096(pull down)
Q9NQT8	Q12959	KIF13B	DLG1	psi-mi:MI:0096(pull down)
Q9NQT8	O75689	KIF13B	ADAP1	psi-mi:MI:0114(x-ray crystallography)
Q15058	A0A0S2Z528	KIF14	PSTPIP1	psi-mi:MI:0006(anti bait coimmunoprecipitation)
Q15058	O43353	KIF14	RIPK2	psi-mi:MI:0006(anti bait coimmunoprecipitation)
Q15058	P56385	KIF14	ATP5ME	psi-mi:MI:0007(anti tag coimmunoprecipitation)
Q15058	Q96EK5	KIF14	KIF1BP	psi-mi:MI:0007(anti tag coimmunoprecipitation)
Q15058	Q9UM00	KIF14	TMCO1	psi-mi:MI:0007(anti tag coimmunoprecipitation)
Q15058	O60287	KIF14	URB1	psi-mi:MI:0007(anti tag coimmunoprecipitation)
Q9NS87	Q9Y5K6	KIF15	CD2AP	psi-mi:MI:0007(anti tag coimmunoprecipitation)
Q9NS87	E9PDN5	KIF15	DMD	psi-mi:MI:0007(anti tag coimmunoprecipitation)
Q9NS87	Q96BJ8	KIF15	ELMO3	psi-mi:MI:0007(anti tag coimmunoprecipitation)
Q9NS87	O15287	KIF15	FANCG	psi-mi:MI:0007(anti tag coimmunoprecipitation)
Q9NS87	Q96AT1	KIF15	KIAA1143	psi-mi:MI:0007(anti tag coimmunoprecipitation)
Q9NS87	Q96EK5	KIF15	KIF1BP	psi-mi:MI:0007(anti tag coimmunoprecipitation)
Q9NS87	Q96EK5	KIF15	KIF1BP	psi-mi:MI:0007(anti tag coimmunoprecipitation)
Q9NS87	O75586	KIF15	MED6	psi-mi:MI:0007(anti tag coimmunoprecipitation)
Q9NS87	Q9BV20	KIF15	MRI1	psi-mi:MI:0007(anti tag coimmunoprecipitation)
Q9NS87	Q9H9J2	KIF15	MRPL44	psi-mi:MI:0007(anti tag coimmunoprecipitation)
Q9NS87	H0Y7P7	KIF15	PISD	psi-mi:MI:0007(anti tag coimmunoprecipitation)
Q9NS87	Q9HAU5	KIF15	UPF2	psi-mi:MI:0007(anti tag coimmunoprecipitation)
Q8NI77	Q32NC0	KIF18A	C18orf21	psi-mi:MI:0007(anti tag coimmunoprecipitation)
Q8NI77	P55060	KIF18A	CSE1L	psi-mi:MI:0007(anti tag coimmunoprecipitation)
Q8NI77	Q96AY2	KIF18A	EME1	psi-mi:MI:0007(anti tag coimmunoprecipitation)
Q8NI77	Q08050	KIF18A	FOXM1	psi-mi:MI:0007(anti tag coimmunoprecipitation)
Q8NI77	Q5VSY0	KIF18A	GKAP1	psi-mi:MI:0007(anti tag coimmunoprecipitation)
Q8NI77	Q9UMF0	KIF18A	ICAM5	psi-mi:MI:0007(anti tag coimmunoprecipitation)
Q8NI77	Q9Y287	KIF18A	ITM2B	psi-mi:MI:0007(anti tag coimmunoprecipitation)
Q8NI77	Q96EK5	KIF18A	KIF1BP	psi-mi:MI:0007(anti tag coimmunoprecipitation)
Q8NI77	Q8NG31	KIF18A	KNL1	psi-mi:MI:0007(anti tag coimmunoprecipitation)
Q8NI77	Q9BUB5	KIF18A	MKNK1	psi-mi:MI:0007(anti tag coimmunoprecipitation)
Q8NI77	O75376	KIF18A	NCOR1	psi-mi:MI:0007(anti tag coimmunoprecipitation)
Q8NI77	Q16401	KIF18A	PSMD5	psi-mi:MI:0007(anti tag coimmunoprecipitation)
Q8NI77	Q9Y3A4	KIF18A	RRP7A	psi-mi:MI:0007(anti tag coimmunoprecipitation)
Q8NI77	Q9ULF5	KIF18A	SLC39A10	psi-mi:MI:0007(anti tag coimmunoprecipitation)
Q8NI77	P15923	KIF18A	TCF3	psi-mi:MI:0007(anti tag coimmunoprecipitation)
Q8NI77	P53804	KIF18A	TTC3	psi-mi:MI:0007(anti tag coimmunoprecipitation)
Q8NI77	Q15653	KIF18A	NFKBIB	psi-mi:MI:0676(tandem affinity purification)
Q12756	Q12756	KIF1A	KIF1A	psi-mi:MI:0096(pull down)
Q12756	Q12756	KIF1A	KIF1A	psi-mi:MI:0096(pull down)
Q12756	Q12756	KIF1A	KIF1A	psi-mi:MI:0096(pull down)
Q12756	Q12756	KIF1A	KIF1A	psi-mi:MI:0096(pull down)
Q12756	Q12756	KIF1A	KIF1A	psi-mi:MI:0096(pull down)
Q12756	Q12756	KIF1A	KIF1A	psi-mi:MI:0096(pull down)
Q12756	Q12756	KIF1A	KIF1A	psi-mi:MI:0096(pull down)
Q12756	Q12756	KIF1A	KIF1A	psi-mi:MI:0096(pull down)
Q12756	Q12756	KIF1A	KIF1A	psi-mi:MI:0114(x-ray crystallography)
Q12756	Q12756	KIF1A	KIF1A	psi-mi:MI:0114(x-ray crystallography)
O60333	Q7Z460	KIF1B	CLASP1	psi-mi:MI:0006(anti bait coimmunoprecipitation)
O60333	P61981	KIF1B	YWHAG	psi-mi:MI:0006(anti bait coimmunoprecipitation)
O43896	Q9Y2J2	KIF1C	EPB41L3	psi-mi:MI:0007(anti tag coimmunoprecipitation)
O43896	A8K7Q2	KIF1C	HSPA8	psi-mi:MI:0007(anti tag coimmunoprecipitation)
O43896	Q9NVH2	KIF1C	INTS7	psi-mi:MI:0007(anti tag coimmunoprecipitation)
O43896	Q99698	KIF1C	LYST	psi-mi:MI:0007(anti tag coimmunoprecipitation)
O43896	Q9BUB5	KIF1C	MKNK1	psi-mi:MI:0007(anti tag coimmunoprecipitation)
O43896	Q9UBC5	KIF1C	MYO1A	psi-mi:MI:0007(anti tag coimmunoprecipitation)
O43896	Q6ZS30	KIF1C	NBEAL1	psi-mi:MI:0007(anti tag coimmunoprecipitation)
O43896	P62487	KIF1C	POLR2G	psi-mi:MI:0007(anti tag coimmunoprecipitation)
O43896	Q13523	KIF1C	PRPF4B	psi-mi:MI:0007(anti tag coimmunoprecipitation)
O43896	P62826	KIF1C	RAN	psi-mi:MI:0007(anti tag coimmunoprecipitation)
O43896	Q9HCK4	KIF1C	ROBO2	psi-mi:MI:0007(anti tag coimmunoprecipitation)
O43896	P61088	KIF1C	UBE2N	psi-mi:MI:0007(anti tag coimmunoprecipitation)
O43896	F5H8B4	KIF1C	UTY	psi-mi:MI:0007(anti tag coimmunoprecipitation)
O95235	Q9BWT7	KIF20A	CARD10	psi-mi:MI:0007(anti tag coimmunoprecipitation)
O95235	Q53HL2	KIF20A	CDCA8	psi-mi:MI:0007(anti tag coimmunoprecipitation)
O95235	P07199	KIF20A	CENPB	psi-mi:MI:0007(anti tag coimmunoprecipitation)
O95235	O95714	KIF20A	HERC2	psi-mi:MI:0007(anti tag coimmunoprecipitation)
O95235	Q96MM7	KIF20A	HS6ST2	psi-mi:MI:0007(anti tag coimmunoprecipitation)
O95235	P32019	KIF20A	INPP5B	psi-mi:MI:0007(anti tag coimmunoprecipitation)
O95235	Q9UIS9	KIF20A	MBD1	psi-mi:MI:0007(anti tag coimmunoprecipitation)
O95235	O95243	KIF20A	MBD4	psi-mi:MI:0007(anti tag coimmunoprecipitation)
O95235	Q96JN8	KIF20A	NEURL4	psi-mi:MI:0007(anti tag coimmunoprecipitation)
O95235	Q14980	KIF20A	NUMA1	psi-mi:MI:0007(anti tag coimmunoprecipitation)
O95235	O43175	KIF20A	PHGDH	psi-mi:MI:0007(anti tag coimmunoprecipitation)
O95235	Q6P5Z2	KIF20A	PKN3	psi-mi:MI:0007(anti tag coimmunoprecipitation)
O95235	Q9H3S7	KIF20A	PTPN23	psi-mi:MI:0007(anti tag coimmunoprecipitation)
O95235	Q9H0E3	KIF20A	SAP130	psi-mi:MI:0007(anti tag coimmunoprecipitation)
O95235	O60232	KIF20A	SSSCA1	psi-mi:MI:0007(anti tag coimmunoprecipitation)
O95235	O95271	KIF20A	TNKS	psi-mi:MI:0007(anti tag coimmunoprecipitation)
O95235	Q9H0U9	KIF20A	TSPYL1	psi-mi:MI:0007(anti tag coimmunoprecipitation)
O95235	P55072	KIF20A	VCP	psi-mi:MI:0007(anti tag coimmunoprecipitation)
Q96Q89	Q9Y265	KIF20B	RUVBL1	psi-mi:MI:0006(anti bait coimmunoprecipitation)
Q96Q89	P31946	KIF20B	YWHAB	psi-mi:MI:0006(anti bait coimmunoprecipitation)
Q96Q89	O95573	KIF20B	ACSL3	psi-mi:MI:0007(anti tag coimmunoprecipitation)
Q96Q89	Q2TB18	KIF20B	ASTE1	psi-mi:MI:0007(anti tag coimmunoprecipitation)
Q96Q89	Q8N6N3	KIF20B	C1orf52	psi-mi:MI:0007(anti tag coimmunoprecipitation)
Q96Q89	Q5VT25	KIF20B	CDC42BPA	psi-mi:MI:0007(anti tag coimmunoprecipitation)
Q96Q89	Q96DG6	KIF20B	CMBL	psi-mi:MI:0007(anti tag coimmunoprecipitation)
Q96Q89	Q16526	KIF20B	CRY1	psi-mi:MI:0007(anti tag coimmunoprecipitation)
Q96Q89	P26641	KIF20B	EEF1G	psi-mi:MI:0007(anti tag coimmunoprecipitation)
Q96Q89	P14625	KIF20B	HSP90B1	psi-mi:MI:0007(anti tag coimmunoprecipitation)
Q96Q89	Q9P2X3	KIF20B	IMPACT	psi-mi:MI:0007(anti tag coimmunoprecipitation)
Q96Q89	Q9Y2K7	KIF20B	KDM2A	psi-mi:MI:0007(anti tag coimmunoprecipitation)
Q96Q89	Q96QD8	KIF20B	SLC38A2	psi-mi:MI:0007(anti tag coimmunoprecipitation)
Q96Q89	Q8WVM7	KIF20B	STAG1	psi-mi:MI:0007(anti tag coimmunoprecipitation)
Q96Q89	Q96JH7	KIF20B	VCPIP1	psi-mi:MI:0007(anti tag coimmunoprecipitation)
Q96Q89	Q9BW85	KIF20B	YJU2	psi-mi:MI:0007(anti tag coimmunoprecipitation)
Q7Z4S6	Q9Y6D6	KIF21A	ARFGEF1	psi-mi:MI:0006(anti bait coimmunoprecipitation)
Q7Z4S6	Q9Y6D6	KIF21A	ARFGEF1	psi-mi:MI:0007(anti tag coimmunoprecipitation)
Q7Z4S6	Q0P5T2	KIF21A	C6orf136	psi-mi:MI:0007(anti tag coimmunoprecipitation)
Q7Z4S6	P78371	KIF21A	CCT2	psi-mi:MI:0007(anti tag coimmunoprecipitation)
Q7Z4S6	P49368	KIF21A	CCT3	psi-mi:MI:0007(anti tag coimmunoprecipitation)
Q7Z4S6	P50991	KIF21A	CCT4	psi-mi:MI:0007(anti tag coimmunoprecipitation)
Q7Z4S6	P48643	KIF21A	CCT5	psi-mi:MI:0007(anti tag coimmunoprecipitation)
Q7Z4S6	P40227	KIF21A	CCT6A	psi-mi:MI:0007(anti tag coimmunoprecipitation)
Q7Z4S6	Q99832	KIF21A	CCT7	psi-mi:MI:0007(anti tag coimmunoprecipitation)
Q7Z4S6	P50990	KIF21A	CCT8	psi-mi:MI:0007(anti tag coimmunoprecipitation)
Q7Z4S6	Q8TCZ2	KIF21A	CD99L2	psi-mi:MI:0007(anti tag coimmunoprecipitation)
Q7Z4S6	Q86XP1	KIF21A	DGKH	psi-mi:MI:0007(anti tag coimmunoprecipitation)
Q7Z4S6	O94919	KIF21A	ENDOD1	psi-mi:MI:0007(anti tag coimmunoprecipitation)
Q7Z4S6	Q6UN15	KIF21A	FIP1L1	psi-mi:MI:0007(anti tag coimmunoprecipitation)
Q7Z4S6	Q14678	KIF21A	KANK1	psi-mi:MI:0007(anti tag coimmunoprecipitation)
Q7Z4S6	Q14678	KIF21A	KANK1	psi-mi:MI:0007(anti tag coimmunoprecipitation)
Q7Z4S6	Q14678	KIF21A	KANK1	psi-mi:MI:0007(anti tag coimmunoprecipitation)
Q7Z4S6	Q14678	KIF21A	KANK1	psi-mi:MI:0007(anti tag coimmunoprecipitation)
Q7Z4S6	Q63ZY3	KIF21A	KANK2	psi-mi:MI:0007(anti tag coimmunoprecipitation)
Q7Z4S6	Q7Z4S6	KIF21A	KIF21A	psi-mi:MI:0007(anti tag coimmunoprecipitation)
Q7Z4S6	Q7Z4S6	KIF21A	KIF21A	psi-mi:MI:0007(anti tag coimmunoprecipitation)
Q7Z4S6	J3KNB8	KIF21A	MAP3K4	psi-mi:MI:0007(anti tag coimmunoprecipitation)
Q7Z4S6	Q96DH6	KIF21A	MSI2	psi-mi:MI:0007(anti tag coimmunoprecipitation)
Q7Z4S6	B4DF87	KIF21A	NCOA4	psi-mi:MI:0007(anti tag coimmunoprecipitation)
Q7Z4S6	Q76FK4	KIF21A	NOL8	psi-mi:MI:0007(anti tag coimmunoprecipitation)
Q7Z4S6	Q14978	KIF21A	NOLC1	psi-mi:MI:0007(anti tag coimmunoprecipitation)
Q7Z4S6	O15381	KIF21A	NVL	psi-mi:MI:0007(anti tag coimmunoprecipitation)
Q7Z4S6	O60925	KIF21A	PFDN1	psi-mi:MI:0007(anti tag coimmunoprecipitation)
Q7Z4S6	Q9UHV9	KIF21A	PFDN2	psi-mi:MI:0007(anti tag coimmunoprecipitation)
Q7Z4S6	E9PJ24	KIF21A	PHRF1	psi-mi:MI:0007(anti tag coimmunoprecipitation)
Q7Z4S6	P51805	KIF21A	PLXNA3	psi-mi:MI:0007(anti tag coimmunoprecipitation)
Q7Z4S6	Q86W92	KIF21A	PPFIBP1	psi-mi:MI:0007(anti tag coimmunoprecipitation)
Q7Z4S6	Q7L804	KIF21A	RAB11FIP2	psi-mi:MI:0007(anti tag coimmunoprecipitation)
Q7Z4S6	Q06609	KIF21A	RAD51	psi-mi:MI:0007(anti tag coimmunoprecipitation)
Q7Z4S6	Q9BWF3	KIF21A	RBM4	psi-mi:MI:0007(anti tag coimmunoprecipitation)
Q7Z4S6	Q5XPI4	KIF21A	RNF123	psi-mi:MI:0007(anti tag coimmunoprecipitation)
Q7Z4S6	E9PBC6	KIF21A	TACC2	psi-mi:MI:0007(anti tag coimmunoprecipitation)
Q7Z4S6	O15119	KIF21A	TBX3	psi-mi:MI:0007(anti tag coimmunoprecipitation)
Q7Z4S6	P17987	KIF21A	TCP1	psi-mi:MI:0007(anti tag coimmunoprecipitation)
Q7Z4S6	Q8N5M4	KIF21A	TTC9C	psi-mi:MI:0007(anti tag coimmunoprecipitation)
Q7Z4S6	P11441	KIF21A	UBL4A	psi-mi:MI:0007(anti tag coimmunoprecipitation)
Q7Z4S6	Q9H2Y7	KIF21A	ZNF106	psi-mi:MI:0007(anti tag coimmunoprecipitation)
Q7Z4S6	Q96K58	KIF21A	ZNF668	psi-mi:MI:0007(anti tag coimmunoprecipitation)
Q7Z4S6	Q14678	KIF21A	KANK1	psi-mi:MI:0096(pull down)
O75037	P46379	KIF21B	BAG6	psi-mi:MI:0007(anti tag coimmunoprecipitation)
O75037	P43251	KIF21B	BTD	psi-mi:MI:0007(anti tag coimmunoprecipitation)
O75037	P29400	KIF21B	COL4A5	psi-mi:MI:0007(anti tag coimmunoprecipitation)
O75037	Q10570	KIF21B	CPSF1	psi-mi:MI:0007(anti tag coimmunoprecipitation)
O75037	Q9UKF6	KIF21B	CPSF3	psi-mi:MI:0007(anti tag coimmunoprecipitation)
O75037	P33240	KIF21B	CSTF2	psi-mi:MI:0007(anti tag coimmunoprecipitation)
O75037	Q96I24	KIF21B	FUBP3	psi-mi:MI:0007(anti tag coimmunoprecipitation)
O75037	Q7Z4S6	KIF21B	KIF21A	psi-mi:MI:0007(anti tag coimmunoprecipitation)
O75037	Q9NPJ6	KIF21B	MED4	psi-mi:MI:0007(anti tag coimmunoprecipitation)
O75037	O43809	KIF21B	NUDT21	psi-mi:MI:0007(anti tag coimmunoprecipitation)
O75037	Q32P28	KIF21B	P3H1	psi-mi:MI:0007(anti tag coimmunoprecipitation)
O75037	Q9NRF9	KIF21B	POLE3	psi-mi:MI:0007(anti tag coimmunoprecipitation)
O75037	O94906	KIF21B	PRPF6	psi-mi:MI:0007(anti tag coimmunoprecipitation)
O75037	O60506	KIF21B	SYNCRIP	psi-mi:MI:0007(anti tag coimmunoprecipitation)
O75037	Q16514	KIF21B	TAF12	psi-mi:MI:0007(anti tag coimmunoprecipitation)
O75037	Q15542	KIF21B	TAF5	psi-mi:MI:0007(anti tag coimmunoprecipitation)
O75037	O15119	KIF21B	TBX3	psi-mi:MI:0007(anti tag coimmunoprecipitation)
O75037	Q8IUC6	KIF21B	TICAM1	psi-mi:MI:0007(anti tag coimmunoprecipitation)
O75037	P11441	KIF21B	UBL4A	psi-mi:MI:0007(anti tag coimmunoprecipitation)
O75037	Q8IWA0	KIF21B	WDR75	psi-mi:MI:0007(anti tag coimmunoprecipitation)
Q14807	O43521	KIF22	BCL2L11	psi-mi:MI:0007(anti tag coimmunoprecipitation)
Q14807	Q9NR09	KIF22	BIRC6	psi-mi:MI:0007(anti tag coimmunoprecipitation)
Q14807	Q32NC0	KIF22	C18orf21	psi-mi:MI:0007(anti tag coimmunoprecipitation)
Q14807	P0C0L5	KIF22	C4B	psi-mi:MI:0007(anti tag coimmunoprecipitation)
Q14807	P14635	KIF22	CCNB1	psi-mi:MI:0007(anti tag coimmunoprecipitation)
Q14807	Q96S94	KIF22	CCNL2	psi-mi:MI:0007(anti tag coimmunoprecipitation)
Q14807	O95400	KIF22	CD2BP2	psi-mi:MI:0007(anti tag coimmunoprecipitation)
Q14807	Q5VT06	KIF22	CEP350	psi-mi:MI:0007(anti tag coimmunoprecipitation)
Q14807	Q9Y6K0	KIF22	CEPT1	psi-mi:MI:0007(anti tag coimmunoprecipitation)
Q14807	Q8WWK9	KIF22	CKAP2	psi-mi:MI:0007(anti tag coimmunoprecipitation)
Q14807	P20674	KIF22	COX5A	psi-mi:MI:0007(anti tag coimmunoprecipitation)
Q14807	Q9H329	KIF22	EPB41L4B	psi-mi:MI:0007(anti tag coimmunoprecipitation)
Q14807	P35637	KIF22	FUS	psi-mi:MI:0007(anti tag coimmunoprecipitation)
Q14807	Q9UGU5	KIF22	HMGXB4	psi-mi:MI:0007(anti tag coimmunoprecipitation)
Q14807	Q9Y448	KIF22	KNSTRN	psi-mi:MI:0007(anti tag coimmunoprecipitation)
Q14807	O00505	KIF22	KPNA3	psi-mi:MI:0007(anti tag coimmunoprecipitation)
Q14807	O00629	KIF22	KPNA4	psi-mi:MI:0007(anti tag coimmunoprecipitation)
Q14807	P48059	KIF22	LIMS1	psi-mi:MI:0007(anti tag coimmunoprecipitation)
Q14807	O60337	KIF22	MARCH6	psi-mi:MI:0007(anti tag coimmunoprecipitation)
Q14807	O75970	KIF22	MPDZ	psi-mi:MI:0007(anti tag coimmunoprecipitation)
Q14807	Q6PCE3	KIF22	PGM2L1	psi-mi:MI:0007(anti tag coimmunoprecipitation)
Q14807	Q6PCE3	KIF22	PGM2L1	psi-mi:MI:0007(anti tag coimmunoprecipitation)
Q14807	Q96BD5	KIF22	PHF21A	psi-mi:MI:0007(anti tag coimmunoprecipitation)
Q14807	E5RHT1	KIF22	PSEN2	psi-mi:MI:0007(anti tag coimmunoprecipitation)
Q14807	Q6PGN9	KIF22	PSRC1	psi-mi:MI:0007(anti tag coimmunoprecipitation)
Q14807	Q9UHJ3	KIF22	SFMBT1	psi-mi:MI:0007(anti tag coimmunoprecipitation)
Q14807	Q9HB58	KIF22	SP110	psi-mi:MI:0007(anti tag coimmunoprecipitation)
Q14807	P42226	KIF22	STAT6	psi-mi:MI:0007(anti tag coimmunoprecipitation)
Q14807	Q16514	KIF22	TAF12	psi-mi:MI:0007(anti tag coimmunoprecipitation)
Q14807	Q9BRU9	KIF22	UTP23	psi-mi:MI:0007(anti tag coimmunoprecipitation)
Q14807	Q969X6	KIF22	UTP4	psi-mi:MI:0007(anti tag coimmunoprecipitation)
Q14807	Q9H6R7	KIF22	WDCP	psi-mi:MI:0007(anti tag coimmunoprecipitation)
Q14807	Q96K58	KIF22	ZNF668	psi-mi:MI:0007(anti tag coimmunoprecipitation)
Q02241	Q9H8V3	KIF23	ECT2	psi-mi:MI:0006(anti bait coimmunoprecipitation)
Q02241	P67775	KIF23	PPP2CA	psi-mi:MI:0006(anti bait coimmunoprecipitation)
Q02241	Q16537	KIF23	PPP2R5E	psi-mi:MI:0006(anti bait coimmunoprecipitation)
Q02241	Q9H0H5	KIF23	RACGAP1	psi-mi:MI:0006(anti bait coimmunoprecipitation)
Q02241	Q9H0H5	KIF23	RACGAP1	psi-mi:MI:0006(anti bait coimmunoprecipitation)
Q02241	P31946	KIF23	YWHAB	psi-mi:MI:0006(anti bait coimmunoprecipitation)
Q02241	P61981	KIF23	YWHAG	psi-mi:MI:0006(anti bait coimmunoprecipitation)
Q02241	P27348	KIF23	YWHAQ	psi-mi:MI:0006(anti bait coimmunoprecipitation)
Q02241	P16615	KIF23	ATP2A2	psi-mi:MI:0007(anti tag coimmunoprecipitation)
Q02241	Q9NR09	KIF23	BIRC6	psi-mi:MI:0007(anti tag coimmunoprecipitation)
Q02241	Q9Y5K6	KIF23	CD2AP	psi-mi:MI:0007(anti tag coimmunoprecipitation)
Q02241	Q53EZ4	KIF23	CEP55	psi-mi:MI:0007(anti tag coimmunoprecipitation)
Q02241	Q8IUD2	KIF23	ERC1	psi-mi:MI:0007(anti tag coimmunoprecipitation)
Q02241	P42858	KIF23	HTT	psi-mi:MI:0007(anti tag coimmunoprecipitation)
Q02241	J3KNB8	KIF23	MAP3K4	psi-mi:MI:0007(anti tag coimmunoprecipitation)
Q02241	Q7RTP6	KIF23	MICAL3	psi-mi:MI:0007(anti tag coimmunoprecipitation)
Q02241	Q86SQ0	KIF23	PHLDB2	psi-mi:MI:0007(anti tag coimmunoprecipitation)
Q02241	Q9H0H5	KIF23	RACGAP1	psi-mi:MI:0007(anti tag coimmunoprecipitation)
Q02241	Q8NEM2	KIF23	SHCBP1	psi-mi:MI:0007(anti tag coimmunoprecipitation)
Q02241	Q93009	KIF23	USP7	psi-mi:MI:0007(anti tag coimmunoprecipitation)
Q02241	P31946	KIF23	YWHAB	psi-mi:MI:0007(anti tag coimmunoprecipitation)
Q02241	P61981	KIF23	YWHAG	psi-mi:MI:0007(anti tag coimmunoprecipitation)
Q02241	Q04917	KIF23	YWHAH	psi-mi:MI:0007(anti tag coimmunoprecipitation)
Q02241	P61981	KIF23	YWHAG	psi-mi:MI:0019(coimmunoprecipitation)
Q02241	P62330	KIF23	ARF6	psi-mi:MI:0096(pull down)
Q02241	P62330	KIF23	ARF6	psi-mi:MI:0096(pull down)
Q02241	P62330	KIF23	ARF6	psi-mi:MI:0096(pull down)
Q02241	P62330	KIF23	ARF6	psi-mi:MI:0096(pull down)
Q02241	P62330	KIF23	ARF6	psi-mi:MI:0096(pull down)
Q02241	P62330	KIF23	ARF6	psi-mi:MI:0096(pull down)
Q02241	P62330	KIF23	ARF6	psi-mi:MI:0096(pull down)
Q02241	P62330	KIF23	ARF6	psi-mi:MI:0096(pull down)
Q02241	Q7RTP6	KIF23	MICAL3	psi-mi:MI:0096(pull down)
Q02241	Q7RTP6	KIF23	MICAL3	psi-mi:MI:0096(pull down)
Q02241	Q7RTP6	KIF23	MICAL3	psi-mi:MI:0096(pull down)
Q02241	Q7RTP6	KIF23	MICAL3	psi-mi:MI:0096(pull down)
Q02241	Q7RTP6	KIF23	MICAL3	psi-mi:MI:0096(pull down)
Q02241	Q7RTP6	KIF23	MICAL3	psi-mi:MI:0096(pull down)
Q02241	Q9H0H5	KIF23	RACGAP1	psi-mi:MI:0096(pull down)
Q02241	P61981	KIF23	YWHAG	psi-mi:MI:0096(pull down)
Q02241	P63104	KIF23	YWHAZ	psi-mi:MI:0096(pull down)
Q02241	P31947	KIF23	SFN	psi-mi:MI:0676(tandem affinity purification)
Q5T7B8	O43303	KIF24	CCP110	psi-mi:MI:0006(anti bait coimmunoprecipitation)
Q5T7B8	O43303	KIF24	CCP110	psi-mi:MI:0006(anti bait coimmunoprecipitation)
Q5T7B8	O43303	KIF24	CCP110	psi-mi:MI:0006(anti bait coimmunoprecipitation)
Q5T7B8	Q8IW35	KIF24	CEP97	psi-mi:MI:0006(anti bait coimmunoprecipitation)
Q5T7B8	Q8IW35	KIF24	CEP97	psi-mi:MI:0006(anti bait coimmunoprecipitation)
Q5T7B8	Q8IW35	KIF24	CEP97	psi-mi:MI:0006(anti bait coimmunoprecipitation)
Q5T7B8	O43303	KIF24	CCP110	psi-mi:MI:0007(anti tag coimmunoprecipitation)
Q5T7B8	O43303	KIF24	CCP110	psi-mi:MI:0007(anti tag coimmunoprecipitation)
Q5T7B8	Q8IW35	KIF24	CEP97	psi-mi:MI:0007(anti tag coimmunoprecipitation)
Q5T7B8	Q8IW35	KIF24	CEP97	psi-mi:MI:0007(anti tag coimmunoprecipitation)
Q5T7B8	Q8IW35	KIF24	CEP97	psi-mi:MI:0007(anti tag coimmunoprecipitation)
Q5T7B8	Q8TEK3	KIF24	DOT1L	psi-mi:MI:0007(anti tag coimmunoprecipitation)
Q5T7B8	P23458	KIF24	JAK1	psi-mi:MI:0007(anti tag coimmunoprecipitation)
Q5T7B8	Q5T7B8	KIF24	KIF24	psi-mi:MI:0007(anti tag coimmunoprecipitation)
Q5T7B8	Q5T7B8	KIF24	KIF24	psi-mi:MI:0007(anti tag coimmunoprecipitation)
Q5T7B8	Q86WX3	KIF24	RPS19BP1	psi-mi:MI:0007(anti tag coimmunoprecipitation)
Q5T7B8	Q5T7B8	KIF24	KIF24	psi-mi:MI:0055(fluorescent resonance energy transfer)
Q5T7B8	Q5T7B8	KIF24	KIF24	psi-mi:MI:0055(fluorescent resonance energy transfer)
Q5T7B8	P51955	KIF24	NEK2	psi-mi:MI:0424(protein kinase assay)
Q9ULI4	P14618	KIF26A	PKM	psi-mi:MI:0424(protein kinase assay)
Q2KJY2	Q86XL3	KIF26B	ANKLE2	psi-mi:MI:0007(anti tag coimmunoprecipitation)
Q2KJY2	O14936	KIF26B	CASK	psi-mi:MI:0007(anti tag coimmunoprecipitation)
Q2KJY2	Q75N03	KIF26B	CBLL1	psi-mi:MI:0007(anti tag coimmunoprecipitation)
Q2KJY2	Q12959	KIF26B	DLG1	psi-mi:MI:0007(anti tag coimmunoprecipitation)
Q2KJY2	Q9NUP9	KIF26B	LIN7C	psi-mi:MI:0007(anti tag coimmunoprecipitation)
Q2KJY2	Q5T2T1	KIF26B	MPP7	psi-mi:MI:0007(anti tag coimmunoprecipitation)
Q2KJY2	Q9Y2W2	KIF26B	WBP11	psi-mi:MI:0007(anti tag coimmunoprecipitation)
Q2KJY2	Q5T200	KIF26B	ZC3H13	psi-mi:MI:0007(anti tag coimmunoprecipitation)
O00139	P49748	KIF2A	ACADVL	psi-mi:MI:0007(anti tag coimmunoprecipitation)
O00139	P49419	KIF2A	ALDH7A1	psi-mi:MI:0007(anti tag coimmunoprecipitation)
O00139	P46379	KIF2A	BAG6	psi-mi:MI:0007(anti tag coimmunoprecipitation)
O00139	Q8TCZ2	KIF2A	CD99L2	psi-mi:MI:0007(anti tag coimmunoprecipitation)
O00139	Q92879	KIF2A	CELF1	psi-mi:MI:0007(anti tag coimmunoprecipitation)
O00139	Q5SW79	KIF2A	CEP170	psi-mi:MI:0007(anti tag coimmunoprecipitation)
O00139	Q9Y4F5	KIF2A	CEP170B	psi-mi:MI:0007(anti tag coimmunoprecipitation)
O00139	Q8TEP8	KIF2A	CEP192	psi-mi:MI:0007(anti tag coimmunoprecipitation)
O00139	P49674	KIF2A	CSNK1E	psi-mi:MI:0007(anti tag coimmunoprecipitation)
O00139	Q99766	KIF2A	DMAC2L	psi-mi:MI:0007(anti tag coimmunoprecipitation)
O00139	O00303	KIF2A	EIF3F	psi-mi:MI:0007(anti tag coimmunoprecipitation)
O00139	O60645	KIF2A	EXOC3	psi-mi:MI:0007(anti tag coimmunoprecipitation)
O00139	Q6UN15	KIF2A	FIP1L1	psi-mi:MI:0007(anti tag coimmunoprecipitation)
O00139	Q8TAE8	KIF2A	GADD45GIP1	psi-mi:MI:0007(anti tag coimmunoprecipitation)
O00139	Q7L5D6	KIF2A	GET4	psi-mi:MI:0007(anti tag coimmunoprecipitation)
O00139	P15586	KIF2A	GNS	psi-mi:MI:0007(anti tag coimmunoprecipitation)
O00139	O60303	KIF2A	KIAA0556	psi-mi:MI:0007(anti tag coimmunoprecipitation)
O00139	Q99661	KIF2A	KIF2C	psi-mi:MI:0007(anti tag coimmunoprecipitation)
O00139	Q99661	KIF2A	KIF2C	psi-mi:MI:0007(anti tag coimmunoprecipitation)
O00139	Q9Y483	KIF2A	MTF2	psi-mi:MI:0007(anti tag coimmunoprecipitation)
O00139	Q9UBK8	KIF2A	MTRR	psi-mi:MI:0007(anti tag coimmunoprecipitation)
O00139	Q9UBC1	KIF2A	NFKBIL1	psi-mi:MI:0007(anti tag coimmunoprecipitation)
O00139	P17252	KIF2A	PRKCA	psi-mi:MI:0007(anti tag coimmunoprecipitation)
O00139	Q9HCK4	KIF2A	ROBO2	psi-mi:MI:0007(anti tag coimmunoprecipitation)
O00139	Q96K37	KIF2A	SLC35E1	psi-mi:MI:0007(anti tag coimmunoprecipitation)
O00139	Q01085	KIF2A	TIAL1	psi-mi:MI:0007(anti tag coimmunoprecipitation)
O00139	P57727	KIF2A	TMPRSS3	psi-mi:MI:0007(anti tag coimmunoprecipitation)
O00139	Q12931	KIF2A	TRAP1	psi-mi:MI:0007(anti tag coimmunoprecipitation)
O00139	Q9H2D6	KIF2A	TRIOBP	psi-mi:MI:0007(anti tag coimmunoprecipitation)
O00139	P11441	KIF2A	UBL4A	psi-mi:MI:0007(anti tag coimmunoprecipitation)
O00139	O95071	KIF2A	UBR5	psi-mi:MI:0007(anti tag coimmunoprecipitation)
O00139	Q9H6R7	KIF2A	WDCP	psi-mi:MI:0007(anti tag coimmunoprecipitation)
O00139	Q9P2L0	KIF2A	WDR35	psi-mi:MI:0007(anti tag coimmunoprecipitation)
O00139	Q5SVZ6	KIF2A	ZMYM1	psi-mi:MI:0007(anti tag coimmunoprecipitation)
Q99661	Q13443	KIF2C	ADAM9	psi-mi:MI:0007(anti tag coimmunoprecipitation)
Q99661	Q9P287	KIF2C	BCCIP	psi-mi:MI:0007(anti tag coimmunoprecipitation)
Q99661	P55201	KIF2C	BRPF1	psi-mi:MI:0007(anti tag coimmunoprecipitation)
Q99661	Q53HL2	KIF2C	CDCA8	psi-mi:MI:0007(anti tag coimmunoprecipitation)
Q99661	P07199	KIF2C	CENPB	psi-mi:MI:0007(anti tag coimmunoprecipitation)
Q99661	Q5SW79	KIF2C	CEP170	psi-mi:MI:0007(anti tag coimmunoprecipitation)
Q99661	Q14674	KIF2C	ESPL1	psi-mi:MI:0007(anti tag coimmunoprecipitation)
Q99661	P35269	KIF2C	GTF2F1	psi-mi:MI:0007(anti tag coimmunoprecipitation)
Q99661	O00139	KIF2C	KIF2A	psi-mi:MI:0007(anti tag coimmunoprecipitation)
Q99661	Q5XKE5	KIF2C	KRT79	psi-mi:MI:0007(anti tag coimmunoprecipitation)
Q99661	Q9UIS9	KIF2C	MBD1	psi-mi:MI:0007(anti tag coimmunoprecipitation)
Q99661	Q86TS9	KIF2C	MRPL52	psi-mi:MI:0007(anti tag coimmunoprecipitation)
Q99661	Q5JR59	KIF2C	MTUS2	psi-mi:MI:0007(anti tag coimmunoprecipitation)
Q99661	Q86SE9	KIF2C	PCGF5	psi-mi:MI:0007(anti tag coimmunoprecipitation)
Q99661	Q99575	KIF2C	POP1	psi-mi:MI:0007(anti tag coimmunoprecipitation)
Q99661	P46777	KIF2C	RPL5	psi-mi:MI:0007(anti tag coimmunoprecipitation)
Q99661	P18124	KIF2C	RPL7	psi-mi:MI:0007(anti tag coimmunoprecipitation)
Q99661	P32969	KIF2C	RPL9	psi-mi:MI:0007(anti tag coimmunoprecipitation)
Q99661	P62851	KIF2C	RPS25	psi-mi:MI:0007(anti tag coimmunoprecipitation)
Q99661	Q5JTH9	KIF2C	RRP12	psi-mi:MI:0007(anti tag coimmunoprecipitation)
Q99661	Q9BRK5	KIF2C	SDF4	psi-mi:MI:0007(anti tag coimmunoprecipitation)
Q99661	Q8NHU3	KIF2C	SGMS2	psi-mi:MI:0007(anti tag coimmunoprecipitation)
Q99661	O43295	KIF2C	SRGAP3	psi-mi:MI:0007(anti tag coimmunoprecipitation)
Q99661	Q9P0N9	KIF2C	TBC1D7	psi-mi:MI:0007(anti tag coimmunoprecipitation)
Q99661	Q9NXF1	KIF2C	TEX10	psi-mi:MI:0007(anti tag coimmunoprecipitation)
Q99661	Q9BV38	KIF2C	WDR18	psi-mi:MI:0007(anti tag coimmunoprecipitation)
Q99661	O43379	KIF2C	WDR62	psi-mi:MI:0007(anti tag coimmunoprecipitation)
Q99661	Q96K58	KIF2C	ZNF668	psi-mi:MI:0007(anti tag coimmunoprecipitation)
Q99661	Q15691	KIF2C	MAPRE1	psi-mi:MI:0096(pull down)
Q99661	Q5JR59	KIF2C	MTUS2	psi-mi:MI:0096(pull down)
Q9Y496	Q92845	KIF3A	KIFAP3	psi-mi:MI:0006(anti bait coimmunoprecipitation)
Q9Y496	Q8WYA6	KIF3A	CTNNBL1	psi-mi:MI:0007(anti tag coimmunoprecipitation)
Q9Y496	Q14147	KIF3A	DHX34	psi-mi:MI:0007(anti tag coimmunoprecipitation)
Q9Y496	Q9GZU8	KIF3A	FAM192A	psi-mi:MI:0007(anti tag coimmunoprecipitation)
Q9Y496	O15066	KIF3A	KIF3B	psi-mi:MI:0007(anti tag coimmunoprecipitation)
Q9Y496	O15066	KIF3A	KIF3B	psi-mi:MI:0007(anti tag coimmunoprecipitation)
Q9Y496	Q92845	KIF3A	KIFAP3	psi-mi:MI:0007(anti tag coimmunoprecipitation)
Q9Y496	P62826	KIF3A	RAN	psi-mi:MI:0007(anti tag coimmunoprecipitation)
Q9Y496	Q76I76	KIF3A	SSH2	psi-mi:MI:0007(anti tag coimmunoprecipitation)
Q9Y496	O00203	KIF3A	AP3B1	psi-mi:MI:0096(pull down)
Q9Y496	Q9BXF6	KIF3A	RAB11FIP5	psi-mi:MI:0096(pull down)
Q9Y496	O15066	KIF3A	KIF3B	psi-mi:MI:0676(tandem affinity purification)
O15066	Q92845	KIF3B	KIFAP3	psi-mi:MI:0006(anti bait coimmunoprecipitation)
O15066	P51795	KIF3B	CLCN5	psi-mi:MI:0007(anti tag coimmunoprecipitation)
O15066	P51795	KIF3B	CLCN5	psi-mi:MI:0007(anti tag coimmunoprecipitation)
O15066	P51795	KIF3B	CLCN5	psi-mi:MI:0096(pull down)
O15066	Q9Y496	KIF3B	KIF3A	psi-mi:MI:0676(tandem affinity purification)
O15066	Q9Y496	KIF3B	KIF3A	psi-mi:MI:0676(tandem affinity purification)
O15066	Q92845	KIF3B	KIFAP3	psi-mi:MI:0676(tandem affinity purification)
O15066	P62195	KIF3B	PSMC5	psi-mi:MI:0676(tandem affinity purification)
O14782	Q9Y496	KIF3C	KIF3A	psi-mi:MI:0007(anti tag coimmunoprecipitation)
O14782	Q9Y496	KIF3C	KIF3A	psi-mi:MI:0007(anti tag coimmunoprecipitation)
O14782	Q92845	KIF3C	KIFAP3	psi-mi:MI:0007(anti tag coimmunoprecipitation)
O14782	Q8IXZ2	KIF3C	ZC3H3	psi-mi:MI:0007(anti tag coimmunoprecipitation)
O95239	Q9ULA0	KIF4A	DNPEP	psi-mi:MI:0006(anti bait coimmunoprecipitation)
O95239	O94880	KIF4A	PHF14	psi-mi:MI:0006(anti bait coimmunoprecipitation)
O95239	O94880	KIF4A	PHF14	psi-mi:MI:0006(anti bait coimmunoprecipitation)
O95239	O94880	KIF4A	PHF14	psi-mi:MI:0007(anti tag coimmunoprecipitation)
O95239	O94880	KIF4A	PHF14	psi-mi:MI:0096(pull down)
Q12840	Q96NW4	KIF5A	ANKRD27	psi-mi:MI:0007(anti tag coimmunoprecipitation)
Q12840	Q9UPV9	KIF5A	TRAK1	psi-mi:MI:0007(anti tag coimmunoprecipitation)
P33176	P62330	KIF5B	ARF6	psi-mi:MI:0006(anti bait coimmunoprecipitation)
P33176	O75815	KIF5B	BCAR3	psi-mi:MI:0006(anti bait coimmunoprecipitation)
P33176	Q14164	KIF5B	IKBKE	psi-mi:MI:0006(anti bait coimmunoprecipitation)
P33176	Q92597	KIF5B	NDRG1	psi-mi:MI:0006(anti bait coimmunoprecipitation)
P33176	P22392	KIF5B	NME2	psi-mi:MI:0006(anti bait coimmunoprecipitation)
P33176	Q9Y478	KIF5B	PRKAB1	psi-mi:MI:0006(anti bait coimmunoprecipitation)
P33176	Q9UBN6	KIF5B	TNFRSF10D	psi-mi:MI:0006(anti bait coimmunoprecipitation)
P33176	P40337	KIF5B	VHL	psi-mi:MI:0006(anti bait coimmunoprecipitation)
P33176	P31946	KIF5B	YWHAB	psi-mi:MI:0006(anti bait coimmunoprecipitation)
P33176	P61981	KIF5B	YWHAG	psi-mi:MI:0006(anti bait coimmunoprecipitation)
P33176	P27348	KIF5B	YWHAQ	psi-mi:MI:0006(anti bait coimmunoprecipitation)
P33176	P63104	KIF5B	YWHAZ	psi-mi:MI:0006(anti bait coimmunoprecipitation)
P33176	Q9BQS8	KIF5B	FYCO1	psi-mi:MI:0007(anti tag coimmunoprecipitation)
P33176	Q9ULH0	KIF5B	KIDINS220	psi-mi:MI:0007(anti tag coimmunoprecipitation)
P33176	Q07866	KIF5B	KLC1	psi-mi:MI:0007(anti tag coimmunoprecipitation)
P33176	Q07866	KIF5B	KLC1	psi-mi:MI:0007(anti tag coimmunoprecipitation)
P33176	Q07866	KIF5B	KLC1	psi-mi:MI:0007(anti tag coimmunoprecipitation)
P33176	Q07866	KIF5B	KLC1	psi-mi:MI:0007(anti tag coimmunoprecipitation)
P33176	Q07866	KIF5B	KLC1	psi-mi:MI:0007(anti tag coimmunoprecipitation)
P33176	Q07866	KIF5B	KLC1	psi-mi:MI:0007(anti tag coimmunoprecipitation)
P33176	Q9H0B6	KIF5B	KLC2	psi-mi:MI:0007(anti tag coimmunoprecipitation)
P33176	Q9H0B6	KIF5B	KLC2	psi-mi:MI:0007(anti tag coimmunoprecipitation)
P33176	Q6P597	KIF5B	KLC3	psi-mi:MI:0007(anti tag coimmunoprecipitation)
P33176	Q9NSK0	KIF5B	KLC4	psi-mi:MI:0007(anti tag coimmunoprecipitation)
P33176	Q9NSK0	KIF5B	KLC4	psi-mi:MI:0007(anti tag coimmunoprecipitation)
P33176	Q9NSK0	KIF5B	KLC4	psi-mi:MI:0007(anti tag coimmunoprecipitation)
P33176	Q9NSK0	KIF5B	KLC4	psi-mi:MI:0007(anti tag coimmunoprecipitation)
P33176	O75376	KIF5B	NCOR1	psi-mi:MI:0007(anti tag coimmunoprecipitation)
P33176	Q6T4R5	KIF5B	NHS	psi-mi:MI:0007(anti tag coimmunoprecipitation)
P33176	O15294	KIF5B	OGT	psi-mi:MI:0007(anti tag coimmunoprecipitation)
P33176	P28069	KIF5B	POU1F1	psi-mi:MI:0007(anti tag coimmunoprecipitation)
P33176	Q9HBR0	KIF5B	SLC38A10	psi-mi:MI:0007(anti tag coimmunoprecipitation)
P33176	Q13501	KIF5B	SQSTM1	psi-mi:MI:0007(anti tag coimmunoprecipitation)
P33176	Q9UPV9	KIF5B	TRAK1	psi-mi:MI:0007(anti tag coimmunoprecipitation)
P33176	Q71U36	KIF5B	TUBA1A	psi-mi:MI:0007(anti tag coimmunoprecipitation)
P33176	Q9UBH6	KIF5B	XPR1	psi-mi:MI:0007(anti tag coimmunoprecipitation)
P33176	P61981	KIF5B	YWHAG	psi-mi:MI:0019(coimmunoprecipitation)
P33176	P27348	KIF5B	YWHAQ	psi-mi:MI:0019(coimmunoprecipitation)
P33176	P63104	KIF5B	YWHAZ	psi-mi:MI:0019(coimmunoprecipitation)
P33176	P33176	KIF5B	KIF5B	psi-mi:MI:0055(fluorescent resonance energy transfer)
P33176	P33176	KIF5B	KIF5B	psi-mi:MI:0055(fluorescent resonance energy transfer)
P33176	P33176	KIF5B	KIF5B	psi-mi:MI:0055(fluorescent resonance energy transfer)
P33176	P33176	KIF5B	KIF5B	psi-mi:MI:0055(fluorescent resonance energy transfer)
P33176	P33176	KIF5B	KIF5B	psi-mi:MI:0055(fluorescent resonance energy transfer)
P33176	P33176	KIF5B	KIF5B	psi-mi:MI:0055(fluorescent resonance energy transfer)
P33176	Q9BQS8	KIF5B	FYCO1	psi-mi:MI:0096(pull down)
P33176	P33176	KIF5B	KIF5B	psi-mi:MI:0096(pull down)
P33176	P33176	KIF5B	KIF5B	psi-mi:MI:0096(pull down)
P33176	P33176	KIF5B	KIF5B	psi-mi:MI:0096(pull down)
P33176	P33176	KIF5B	KIF5B	psi-mi:MI:0096(pull down)
P33176	P49792	KIF5B	RANBP2	psi-mi:MI:0096(pull down)
P33176	Q9BVN2	KIF5B	RUSC1	psi-mi:MI:0096(pull down)
P33176	Q9Y6K9	KIF5B	IKBKG	psi-mi:MI:0676(tandem affinity purification)
O60282	P68400	KIF5C	CSNK2A1	psi-mi:MI:0006(anti bait coimmunoprecipitation)
O60282	P61981	KIF5C	YWHAG	psi-mi:MI:0006(anti bait coimmunoprecipitation)
O60282	P27348	KIF5C	YWHAQ	psi-mi:MI:0006(anti bait coimmunoprecipitation)
O60282	Q96NW4	KIF5C	ANKRD27	psi-mi:MI:0007(anti tag coimmunoprecipitation)
Q2M1P5	O96019	KIF7	ACTL6A	psi-mi:MI:0007(anti tag coimmunoprecipitation)
Q2M1P5	P25054	KIF7	APC	psi-mi:MI:0007(anti tag coimmunoprecipitation)
Q2M1P5	Q96RK4	KIF7	BBS4	psi-mi:MI:0007(anti tag coimmunoprecipitation)
Q2M1P5	Q5T9S5	KIF7	CCDC18	psi-mi:MI:0007(anti tag coimmunoprecipitation)
Q2M1P5	Q9Y6R9	KIF7	CCDC61	psi-mi:MI:0007(anti tag coimmunoprecipitation)
Q2M1P5	Q9BR77	KIF7	CCDC77	psi-mi:MI:0007(anti tag coimmunoprecipitation)
Q2M1P5	Q9UPN4	KIF7	CEP131	psi-mi:MI:0007(anti tag coimmunoprecipitation)
Q2M1P5	Q9P209	KIF7	CEP72	psi-mi:MI:0007(anti tag coimmunoprecipitation)
Q2M1P5	Q96HP0	KIF7	DOCK6	psi-mi:MI:0007(anti tag coimmunoprecipitation)
Q2M1P5	Q7Z589	KIF7	EMSY	psi-mi:MI:0007(anti tag coimmunoprecipitation)
Q2M1P5	Q9Y2J2	KIF7	EPB41L3	psi-mi:MI:0007(anti tag coimmunoprecipitation)
Q2M1P5	P49915	KIF7	GMPS	psi-mi:MI:0007(anti tag coimmunoprecipitation)
Q2M1P5	P98160	KIF7	HSPG2	psi-mi:MI:0007(anti tag coimmunoprecipitation)
Q2M1P5	Q9P2X3	KIF7	IMPACT	psi-mi:MI:0007(anti tag coimmunoprecipitation)
Q2M1P5	J3KNB8	KIF7	MAP3K4	psi-mi:MI:0007(anti tag coimmunoprecipitation)
Q2M1P5	O95297	KIF7	MPZL1	psi-mi:MI:0007(anti tag coimmunoprecipitation)
Q2M1P5	O15049	KIF7	N4BP3	psi-mi:MI:0007(anti tag coimmunoprecipitation)
Q2M1P5	O43847	KIF7	NRDC	psi-mi:MI:0007(anti tag coimmunoprecipitation)
Q2M1P5	Q15154	KIF7	PCM1	psi-mi:MI:0007(anti tag coimmunoprecipitation)
Q2M1P5	Q15154	KIF7	PCM1	psi-mi:MI:0007(anti tag coimmunoprecipitation)
Q2M1P5	Q86SQ0	KIF7	PHLDB2	psi-mi:MI:0007(anti tag coimmunoprecipitation)
Q2M1P5	Q8WXW3	KIF7	PIBF1	psi-mi:MI:0007(anti tag coimmunoprecipitation)
Q2M1P5	Q7L804	KIF7	RAB11FIP2	psi-mi:MI:0007(anti tag coimmunoprecipitation)
Q2M1P5	Q99708	KIF7	RBBP8	psi-mi:MI:0007(anti tag coimmunoprecipitation)
Q2M1P5	Q9ULF5	KIF7	SLC39A10	psi-mi:MI:0007(anti tag coimmunoprecipitation)
Q2M1P5	P53814	KIF7	SMTN	psi-mi:MI:0007(anti tag coimmunoprecipitation)
Q2M1P5	Q9Y2D8	KIF7	SSX2IP	psi-mi:MI:0007(anti tag coimmunoprecipitation)
Q2M1P5	O95630	KIF7	STAMBP	psi-mi:MI:0007(anti tag coimmunoprecipitation)
Q2M1P5	Q7Z7C8	KIF7	TAF8	psi-mi:MI:0007(anti tag coimmunoprecipitation)
Q2M1P5	E7ERK7	KIF7	TBC1D31	psi-mi:MI:0007(anti tag coimmunoprecipitation)
Q9HAQ2	Q96LA8	KIF9	PRMT6	psi-mi:MI:0007(anti tag coimmunoprecipitation)
Q92845	Q9Y496	KIFAP3	KIF3A	psi-mi:MI:0006(anti bait coimmunoprecipitation)
Q92845	O15066	KIFAP3	KIF3B	psi-mi:MI:0006(anti bait coimmunoprecipitation)
Q92845	Q9Y496	KIFAP3	KIF3A	psi-mi:MI:0007(anti tag coimmunoprecipitation)
Q92845	Q9Y496	KIFAP3	KIF3A	psi-mi:MI:0007(anti tag coimmunoprecipitation)
Q92845	O15066	KIFAP3	KIF3B	psi-mi:MI:0007(anti tag coimmunoprecipitation)
Q92845	O15066	KIFAP3	KIF3B	psi-mi:MI:0007(anti tag coimmunoprecipitation)
Q92845	Q9Y496	KIFAP3	KIF3A	psi-mi:MI:0676(tandem affinity purification)
Q92845	O15066	KIFAP3	KIF3B	psi-mi:MI:0676(tandem affinity purification)
Q9BVG8	H7C1U3	KIFC3	CC2D1B	psi-mi:MI:0007(anti tag coimmunoprecipitation)
Q9BVG8	Q5SW79	KIFC3	CEP170	psi-mi:MI:0007(anti tag coimmunoprecipitation)
Q9BVG8	Q5SW79	KIFC3	CEP170	psi-mi:MI:0007(anti tag coimmunoprecipitation)
Q9BVG8	Q14247	KIFC3	CTTN	psi-mi:MI:0007(anti tag coimmunoprecipitation)
Q9BVG8	Q9Y4B6	KIFC3	DCAF1	psi-mi:MI:0007(anti tag coimmunoprecipitation)
Q9BVG8	Q8IYD8	KIFC3	FANCM	psi-mi:MI:0007(anti tag coimmunoprecipitation)
Q9BVG8	O95714	KIFC3	HERC2	psi-mi:MI:0007(anti tag coimmunoprecipitation)
Q9BVG8	Q9P2N7	KIFC3	KLHL13	psi-mi:MI:0007(anti tag coimmunoprecipitation)
Q9BVG8	J3KRN4	KIFC3	MAP3K3	psi-mi:MI:0007(anti tag coimmunoprecipitation)
Q9BVG8	O60318	KIFC3	MCM3AP	psi-mi:MI:0007(anti tag coimmunoprecipitation)
Q9BVG8	Q6T4R5	KIFC3	NHS	psi-mi:MI:0007(anti tag coimmunoprecipitation)
Q9BVG8	Q9H0X9	KIFC3	OSBPL5	psi-mi:MI:0007(anti tag coimmunoprecipitation)
Q9BVG8	P83876	KIFC3	TXNL4A	psi-mi:MI:0007(anti tag coimmunoprecipitation)
Q9BVG8	O43379	KIFC3	WDR62	psi-mi:MI:0007(anti tag coimmunoprecipitation)
Q9BVG8	O15062	KIFC3	ZBTB5	psi-mi:MI:0007(anti tag coimmunoprecipitation)
Q07866	P33176	KLC1	KIF5B	psi-mi:MI:0007(anti tag coimmunoprecipitation)
Q07866	P33176	KLC1	KIF5B	psi-mi:MI:0007(anti tag coimmunoprecipitation)
Q9H0B6	P33176	KLC2	KIF5B	psi-mi:MI:0007(anti tag coimmunoprecipitation)
Q9H0B6	P33176	KLC2	KIF5B	psi-mi:MI:0007(anti tag coimmunoprecipitation)
Q6P597	P33176	KLC3	KIF5B	psi-mi:MI:0007(anti tag coimmunoprecipitation)
Q9NSK0	Q15058	KLC4	KIF14	psi-mi:MI:0007(anti tag coimmunoprecipitation)
Q9NSK0	P33176	KLC4	KIF5B	psi-mi:MI:0007(anti tag coimmunoprecipitation)
Q14974	Q9BW19	KPNB1	KIFC1	psi-mi:MI:0007(anti tag coimmunoprecipitation)
Q8IVT5	Q2KJY2	KSR1	KIF26B	psi-mi:MI:0007(anti tag coimmunoprecipitation)
Q8IVT5	Q2KJY2	KSR1	KIF26B	psi-mi:MI:0007(anti tag coimmunoprecipitation)
Q8IVT5	Q2KJY2	KSR1	KIF26B	psi-mi:MI:0007(anti tag coimmunoprecipitation)
Q8IVT5	P61106	KSR1	RAB14	psi-mi:MI:0007(anti tag coimmunoprecipitation)
Q8IVT5	P61106	KSR1	RAB14	psi-mi:MI:0007(anti tag coimmunoprecipitation)
Q5T7N2	P33176	L1TD1	KIF5B	psi-mi:MI:0007(anti tag coimmunoprecipitation)
Q86WU2	O43264	LDHD	ZW10	psi-mi:MI:0007(anti tag coimmunoprecipitation)
Q9UHB6	P62820	LIMA1	RAB1A	psi-mi:MI:0007(anti tag coimmunoprecipitation)
Q5S007	P61026	LRRK2	RAB10	psi-mi:MI:0007(anti tag coimmunoprecipitation)
Q5S007	O14966	LRRK2	RAB29	psi-mi:MI:0007(anti tag coimmunoprecipitation)
Q5S007	O14966	LRRK2	RAB29	psi-mi:MI:0007(anti tag coimmunoprecipitation)
Q5S007	O00139	LRRK2	KIF2A	psi-mi:MI:0676(tandem affinity purification)
O94822	Q86Y91	LTN1	KIF18B	psi-mi:MI:0007(anti tag coimmunoprecipitation)
O94822	O00139	LTN1	KIF2A	psi-mi:MI:0007(anti tag coimmunoprecipitation)
Q9Y6D9	Q02224	MAD1L1	CENPE	psi-mi:MI:0006(anti bait coimmunoprecipitation)
Q13257	O95235	MAD2L1	KIF20A	psi-mi:MI:0007(anti tag coimmunoprecipitation)
Q9UI95	Q9BZG1	MAD2L2	RAB34	psi-mi:MI:0007(anti tag coimmunoprecipitation)
Q15691	Q86Y91	MAPRE1	KIF18B	psi-mi:MI:0007(anti tag coimmunoprecipitation)
Q15691	Q99661	MAPRE1	KIF2C	psi-mi:MI:0007(anti tag coimmunoprecipitation)
Q15691	Q99661	MAPRE1	KIF2C	psi-mi:MI:0096(pull down)
Q15691	Q99661	MAPRE1	KIF2C	psi-mi:MI:0096(pull down)
Q15691	Q99661	MAPRE1	KIF2C	psi-mi:MI:0096(pull down)
Q15691	Q86Y91	MAPRE1	KIF18B	psi-mi:MI:0676(tandem affinity purification)
Q15691	Q99661	MAPRE1	KIF2C	psi-mi:MI:0676(tandem affinity purification)
P10636	O43896	MAPT	KIF1C	psi-mi:MI:0006(anti bait coimmunoprecipitation)
P10636	O43264	MAPT	ZW10	psi-mi:MI:0006(anti bait coimmunoprecipitation)
Q7KZI7	Q9NQT8	MARK2	KIF13B	psi-mi:MI:0007(anti tag coimmunoprecipitation)
Q7KZI7	P33176	MARK2	KIF5B	psi-mi:MI:0007(anti tag coimmunoprecipitation)
Q7RTP6	Q02241	MICAL3	KIF23	psi-mi:MI:0096(pull down)
Q7RTP6	P61006	MICAL3	RAB8A	psi-mi:MI:0096(pull down)
P46013	Q8NI77	MKI67	KIF18A	psi-mi:MI:0007(anti tag coimmunoprecipitation)
P46013	Q86Y91	MKI67	KIF18B	psi-mi:MI:0007(anti tag coimmunoprecipitation)
P46013	Q96Q89	MKI67	KIF20B	psi-mi:MI:0007(anti tag coimmunoprecipitation)
P46013	O43264	MKI67	ZW10	psi-mi:MI:0007(anti tag coimmunoprecipitation)
P46013	Q9NS87	MKI67	KIF15	psi-mi:MI:0096(pull down)
P46013	Q9NS87	MKI67	KIF15	psi-mi:MI:0096(pull down)
Q9BV36	P51159	MLPH	RAB27A	psi-mi:MI:0007(anti tag coimmunoprecipitation)
Q9BV36	P51159	MLPH	RAB27A	psi-mi:MI:0007(anti tag coimmunoprecipitation)
Q9BV36	P51159	MLPH	RAB27A	psi-mi:MI:0096(pull down)
Q8N4V1	O43896	MMGT1	KIF1C	psi-mi:MI:0007(anti tag coimmunoprecipitation)
Q13330	P52732	MTA1	KIF11	psi-mi:MI:0007(anti tag coimmunoprecipitation)
P48039	P61026	MTNR1A	RAB10	psi-mi:MI:0676(tandem affinity purification)
P48039	P61026	MTNR1A	RAB10	psi-mi:MI:0676(tandem affinity purification)
P42345	P62820	MTOR	RAB1A	psi-mi:MI:0006(anti bait coimmunoprecipitation)
Q5JR59	Q99661	MTUS2	KIF2C	psi-mi:MI:0096(pull down)
P01106	Q96FN5	MYC	KIF12	psi-mi:MI:0676(tandem affinity purification)
P01106	Q96Q89	MYC	KIF20B	psi-mi:MI:0676(tandem affinity purification)
P01106	Q9UIL4	MYC	KIF25	psi-mi:MI:0676(tandem affinity purification)
P35579	Q9NQT8	MYH9	KIF13B	psi-mi:MI:0007(anti tag coimmunoprecipitation)
A2RRP1	Q6NUQ1	NBAS	RINT1	psi-mi:MI:0006(anti bait coimmunoprecipitation)
A2RRP1	Q6NUQ1	NBAS	RINT1	psi-mi:MI:0006(anti bait coimmunoprecipitation)
A2RRP1	O43264	NBAS	ZW10	psi-mi:MI:0006(anti bait coimmunoprecipitation)
A2RRP1	O43264	NBAS	ZW10	psi-mi:MI:0006(anti bait coimmunoprecipitation)
A2RRP1	Q6NUQ1	NBAS	RINT1	psi-mi:MI:0007(anti tag coimmunoprecipitation)
A2RRP1	Q6NUQ1	NBAS	RINT1	psi-mi:MI:0007(anti tag coimmunoprecipitation)
A2RRP1	Q6NUQ1	NBAS	RINT1	psi-mi:MI:0007(anti tag coimmunoprecipitation)
A2RRP1	O43264	NBAS	ZW10	psi-mi:MI:0007(anti tag coimmunoprecipitation)
A2RRP1	O43264	NBAS	ZW10	psi-mi:MI:0007(anti tag coimmunoprecipitation)
A2RRP1	O43264	NBAS	ZW10	psi-mi:MI:0007(anti tag coimmunoprecipitation)
Q53F19	Q02224	NCBP3	CENPE	psi-mi:MI:0096(pull down)
O14777	O43264	NDC80	ZW10	psi-mi:MI:0006(anti bait coimmunoprecipitation)
O14777	O43264	NDC80	ZW10	psi-mi:MI:0096(pull down)
P51955	Q5T7B8	NEK2	KIF24	psi-mi:MI:0006(anti bait coimmunoprecipitation)
P51955	Q5T7B8	NEK2	KIF24	psi-mi:MI:0006(anti bait coimmunoprecipitation)
P51955	Q5T7B8	NEK2	KIF24	psi-mi:MI:0007(anti tag coimmunoprecipitation)
P51955	Q5T7B8	NEK2	KIF24	psi-mi:MI:0007(anti tag coimmunoprecipitation)
P51955	Q5T7B8	NEK2	KIF24	psi-mi:MI:0007(anti tag coimmunoprecipitation)
P51957	Q9NS87	NEK4	KIF15	psi-mi:MI:0007(anti tag coimmunoprecipitation)
P51957	Q86YS6	NEK4	RAB43	psi-mi:MI:0007(anti tag coimmunoprecipitation)
P51957	Q9P2P6	NEK4	STARD9	psi-mi:MI:0007(anti tag coimmunoprecipitation)
Q96JN8	P33176	NEURL4	KIF5B	psi-mi:MI:0007(anti tag coimmunoprecipitation)
Q96JN8	P33176	NEURL4	KIF5B	psi-mi:MI:0007(anti tag coimmunoprecipitation)
Q96JN8	O60282	NEURL4	KIF5C	psi-mi:MI:0007(anti tag coimmunoprecipitation)
O95644	O95239	NFATC1	KIF4A	psi-mi:MI:0676(tandem affinity purification)
P46531	O00139	NOTCH1	KIF2A	psi-mi:MI:0676(tandem affinity purification)
P46531	Q9Y496	NOTCH1	KIF3A	psi-mi:MI:0676(tandem affinity purification)
Q96RS6	Q12756	NUDCD1	KIF1A	psi-mi:MI:0007(anti tag coimmunoprecipitation)
Q9BZD4	Q9Y496	NUF2	KIF3A	psi-mi:MI:0007(anti tag coimmunoprecipitation)
Q9BZD4	Q02224	NUF2	CENPE	psi-mi:MI:0096(pull down)
P49790	Q9BW19	NUP153	KIFC1	psi-mi:MI:0007(anti tag coimmunoprecipitation)
Q01968	P62491	OCRL	RAB11A	psi-mi:MI:0007(anti tag coimmunoprecipitation)
Q01968	P62820	OCRL	RAB1A	psi-mi:MI:0007(anti tag coimmunoprecipitation)
Q01968	Q9H0U4	OCRL	RAB1B	psi-mi:MI:0007(anti tag coimmunoprecipitation)
Q01968	P20340	OCRL	RAB6A	psi-mi:MI:0007(anti tag coimmunoprecipitation)
Q01968	P62820	OCRL	RAB1A	psi-mi:MI:0096(pull down)
Q01968	P62820	OCRL	RAB1A	psi-mi:MI:0096(pull down)
Q01968	P20340	OCRL	RAB6A	psi-mi:MI:0096(pull down)
Q01968	P20340	OCRL	RAB6A	psi-mi:MI:0096(pull down)
Q01968	P20340	OCRL	RAB6A	psi-mi:MI:0096(pull down)
Q01968	P20340	OCRL	RAB6A	psi-mi:MI:0096(pull down)
Q01968	P20340	OCRL	RAB6A	psi-mi:MI:0096(pull down)
Q01968	P61006	OCRL	RAB8A	psi-mi:MI:0096(pull down)
Q01968	P61006	OCRL	RAB8A	psi-mi:MI:0114(x-ray crystallography)
Q01968	P61106	OCRL	RAB14	psi-mi:MI:0411(enzyme linked immunosorbent assay)
Q01968	P61006	OCRL	RAB8A	psi-mi:MI:0411(enzyme linked immunosorbent assay)
Q01968	P20340	OCRL	RAB6A	psi-mi:MI:0676(tandem affinity purification)
O75665	Q9BVG8	OFD1	KIFC3	psi-mi:MI:0007(anti tag coimmunoprecipitation)
Q9BYG5	Q9BW19	PARD6B	KIFC1	psi-mi:MI:0007(anti tag coimmunoprecipitation)
Q99497	O60333	PARK7	KIF1B	psi-mi:MI:0415(enzymatic study)
Q15154	O95235	PCM1	KIF20A	psi-mi:MI:0007(anti tag coimmunoprecipitation)
Q15154	Q2M1P5	PCM1	KIF7	psi-mi:MI:0007(anti tag coimmunoprecipitation)
O75381	P52732	PEX14	KIF11	psi-mi:MI:0096(pull down)
O75381	P52732	PEX14	KIF11	psi-mi:MI:0096(pull down)
O94880	O95239	PHF14	KIF4A	psi-mi:MI:0006(anti bait coimmunoprecipitation)
O94880	O95239	PHF14	KIF4A	psi-mi:MI:0006(anti bait coimmunoprecipitation)
Q8NEB9	Q14964	PIK3C3	RAB39A	psi-mi:MI:0007(anti tag coimmunoprecipitation)
Q9UKF7	Q9H0U4	PITPNC1	RAB1B	psi-mi:MI:0007(anti tag coimmunoprecipitation)
Q9UKF7	Q9H0U4	PITPNC1	RAB1B	psi-mi:MI:0007(anti tag coimmunoprecipitation)
Q6IQ23	P33176	PLEKHA7	KIF5B	psi-mi:MI:0006(anti bait coimmunoprecipitation)
P62136	Q02224	PPP1CA	CENPE	psi-mi:MI:0096(pull down)
P62136	Q8NI77	PPP1CA	KIF18A	psi-mi:MI:0676(tandem affinity purification)
P62140	Q86Y91	PPP1CB	KIF18B	psi-mi:MI:0007(anti tag coimmunoprecipitation)
P62140	Q8NI77	PPP1CB	KIF18A	psi-mi:MI:0676(tandem affinity purification)
P36873	Q8NI77	PPP1CC	KIF18A	psi-mi:MI:0007(anti tag coimmunoprecipitation)
O75807	P52732	PPP1R15A	KIF11	psi-mi:MI:0007(anti tag coimmunoprecipitation)
Q15435	Q8NI77	PPP1R7	KIF18A	psi-mi:MI:0676(tandem affinity purification)
P30153	P62491	PPP2R1A	RAB11A	psi-mi:MI:0007(anti tag coimmunoprecipitation)
P30154	P62491	PPP2R1B	RAB11A	psi-mi:MI:0007(anti tag coimmunoprecipitation)
O95758	P61026	PTBP3	RAB10	psi-mi:MI:0006(anti bait coimmunoprecipitation)
O95758	P62820	PTBP3	RAB1A	psi-mi:MI:0006(anti bait coimmunoprecipitation)
P23469	O60333	PTPRE	KIF1B	psi-mi:MI:0096(pull down)
P61026	P61966	RAB10	AP1S1	psi-mi:MI:0006(anti bait coimmunoprecipitation)
P61026	O14965	RAB10	AURKA	psi-mi:MI:0006(anti bait coimmunoprecipitation)
P61026	O60496	RAB10	DOK2	psi-mi:MI:0006(anti bait coimmunoprecipitation)
P61026	Q9H3U5	RAB10	MFSD1	psi-mi:MI:0006(anti bait coimmunoprecipitation)
P61026	Q9Y4K3	RAB10	TRAF6	psi-mi:MI:0006(anti bait coimmunoprecipitation)
P61026	P24386	RAB10	CHM	psi-mi:MI:0007(anti tag coimmunoprecipitation)
P61026	P24386	RAB10	CHM	psi-mi:MI:0007(anti tag coimmunoprecipitation)
P61026	P26374	RAB10	CHML	psi-mi:MI:0007(anti tag coimmunoprecipitation)
P61026	P26374	RAB10	CHML	psi-mi:MI:0007(anti tag coimmunoprecipitation)
P61026	P31150	RAB10	GDI1	psi-mi:MI:0007(anti tag coimmunoprecipitation)
P61026	P31150	RAB10	GDI1	psi-mi:MI:0007(anti tag coimmunoprecipitation)
P61026	P31150	RAB10	GDI1	psi-mi:MI:0007(anti tag coimmunoprecipitation)
P61026	P50395	RAB10	GDI2	psi-mi:MI:0007(anti tag coimmunoprecipitation)
P61026	P50395	RAB10	GDI2	psi-mi:MI:0007(anti tag coimmunoprecipitation)
P61026	P50395	RAB10	GDI2	psi-mi:MI:0007(anti tag coimmunoprecipitation)
P61026	Q5S007	RAB10	LRRK2	psi-mi:MI:0007(anti tag coimmunoprecipitation)
P61026	Q7RTP6	RAB10	MICAL3	psi-mi:MI:0007(anti tag coimmunoprecipitation)
P61026	A4D1S5	RAB10	RAB19	psi-mi:MI:0007(anti tag coimmunoprecipitation)
P61026	Q15286	RAB10	RAB35	psi-mi:MI:0007(anti tag coimmunoprecipitation)
P61026	Q14964	RAB10	RAB39A	psi-mi:MI:0007(anti tag coimmunoprecipitation)
P61026	Q14964	RAB10	RAB39A	psi-mi:MI:0007(anti tag coimmunoprecipitation)
P61026	Q9H0N0	RAB10	RAB6C	psi-mi:MI:0007(anti tag coimmunoprecipitation)
P61026	P47224	RAB10	RABIF	psi-mi:MI:0007(anti tag coimmunoprecipitation)
P61026	Q5EBL4	RAB10	RILPL1	psi-mi:MI:0007(anti tag coimmunoprecipitation)
P61026	Q5S007	RAB10	LRRK2	psi-mi:MI:0424(protein kinase assay)
P61026	Q5S007	RAB10	LRRK2	psi-mi:MI:0424(protein kinase assay)
P61026	Q5S007	RAB10	LRRK2	psi-mi:MI:0424(protein kinase assay)
P62491	P00533	RAB11A	EGFR	psi-mi:MI:0006(anti bait coimmunoprecipitation)
P62491	O60447	RAB11A	EVI5	psi-mi:MI:0006(anti bait coimmunoprecipitation)
P62491	Q9UET6	RAB11A	FTSJ1	psi-mi:MI:0006(anti bait coimmunoprecipitation)
P62491	Q14164	RAB11A	IKBKE	psi-mi:MI:0006(anti bait coimmunoprecipitation)
P62491	P23368	RAB11A	ME2	psi-mi:MI:0006(anti bait coimmunoprecipitation)
P62491	Q9Y4K3	RAB11A	TRAF6	psi-mi:MI:0006(anti bait coimmunoprecipitation)
P62491	P40337	RAB11A	VHL	psi-mi:MI:0006(anti bait coimmunoprecipitation)
P62491	P46937	RAB11A	YAP1	psi-mi:MI:0006(anti bait coimmunoprecipitation)
P62491	P46937	RAB11A	YAP1	psi-mi:MI:0006(anti bait coimmunoprecipitation)
P62491	Q9H4M9	RAB11A	EHD1	psi-mi:MI:0007(anti tag coimmunoprecipitation)
P62491	O60447	RAB11A	EVI5	psi-mi:MI:0007(anti tag coimmunoprecipitation)
P62491	Q96CN4	RAB11A	EVI5L	psi-mi:MI:0007(anti tag coimmunoprecipitation)
P62491	Q8NBJ4	RAB11A	GOLM1	psi-mi:MI:0007(anti tag coimmunoprecipitation)
P62491	Q9BX10	RAB11A	GTPBP2	psi-mi:MI:0007(anti tag coimmunoprecipitation)
P62491	Q9ULH0	RAB11A	KIDINS220	psi-mi:MI:0007(anti tag coimmunoprecipitation)
P62491	P35232	RAB11A	PHB	psi-mi:MI:0007(anti tag coimmunoprecipitation)
P62491	Q99623	RAB11A	PHB2	psi-mi:MI:0007(anti tag coimmunoprecipitation)
P62491	Q6WKZ4	RAB11A	RAB11FIP1	psi-mi:MI:0007(anti tag coimmunoprecipitation)
P62491	Q7L804	RAB11A	RAB11FIP2	psi-mi:MI:0007(anti tag coimmunoprecipitation)
P62491	Q7L804	RAB11A	RAB11FIP2	psi-mi:MI:0007(anti tag coimmunoprecipitation)
P62491	Q9BXF6	RAB11A	RAB11FIP5	psi-mi:MI:0007(anti tag coimmunoprecipitation)
P62491	P35610	RAB11A	SOAT1	psi-mi:MI:0007(anti tag coimmunoprecipitation)
P62491	Q9BTV4	RAB11A	TMEM43	psi-mi:MI:0007(anti tag coimmunoprecipitation)
P62491	Q9C0C2	RAB11A	TNKS1BP1	psi-mi:MI:0007(anti tag coimmunoprecipitation)
P62491	Q5JSH3	RAB11A	WDR44	psi-mi:MI:0007(anti tag coimmunoprecipitation)
P62491	Q9HAV4	RAB11A	XPO5	psi-mi:MI:0007(anti tag coimmunoprecipitation)
P62491	P84085	RAB11A	ARF5	psi-mi:MI:0096(pull down)
P62491	O60447	RAB11A	EVI5	psi-mi:MI:0096(pull down)
P62491	O60447	RAB11A	EVI5	psi-mi:MI:0096(pull down)
P62491	Q9HAV7	RAB11A	GRPEL1	psi-mi:MI:0096(pull down)
P62491	P42357	RAB11A	HAL	psi-mi:MI:0096(pull down)
P62491	P0DMV8	RAB11A	HSPA1A	psi-mi:MI:0096(pull down)
P62491	O43813	RAB11A	LANCL1	psi-mi:MI:0096(pull down)
P62491	Q9UBF8	RAB11A	PI4KB	psi-mi:MI:0096(pull down)
P62491	P28070	RAB11A	PSMB4	psi-mi:MI:0096(pull down)
P62491	O75154	RAB11A	RAB11FIP3	psi-mi:MI:0096(pull down)
P62491	O75154	RAB11A	RAB11FIP3	psi-mi:MI:0096(pull down)
P62491	Q86YS3	RAB11A	RAB11FIP4	psi-mi:MI:0096(pull down)
P62491	P61981	RAB11A	YWHAG	psi-mi:MI:0096(pull down)
P62491	Q9UBF8	RAB11A	PI4KB	psi-mi:MI:0114(x-ray crystallography)
P62491	Q7L804	RAB11A	RAB11FIP2	psi-mi:MI:0114(x-ray crystallography)
P62491	Q9UBF8	RAB11A	PI4KB	psi-mi:MI:0949(gdp/gtp exchange assay)
Q6WKZ4	P62491	RAB11FIP1	RAB11A	psi-mi:MI:0006(anti bait coimmunoprecipitation)
Q7L804	P62491	RAB11FIP2	RAB11A	psi-mi:MI:0096(pull down)
O75154	Q02241	RAB11FIP3	KIF23	psi-mi:MI:0007(anti tag coimmunoprecipitation)
O75154	P62491	RAB11FIP3	RAB11A	psi-mi:MI:0096(pull down)
O75154	P62491	RAB11FIP3	RAB11A	psi-mi:MI:0096(pull down)
O75154	P62491	RAB11FIP3	RAB11A	psi-mi:MI:0096(pull down)
O75154	P62491	RAB11FIP3	RAB11A	psi-mi:MI:0096(pull down)
O75154	P62491	RAB11FIP3	RAB11A	psi-mi:MI:0096(pull down)
O75154	P62491	RAB11FIP3	RAB11A	psi-mi:MI:0096(pull down)
O75154	P62491	RAB11FIP3	RAB11A	psi-mi:MI:0114(x-ray crystallography)
O75154	P62491	RAB11FIP3	RAB11A	psi-mi:MI:0114(x-ray crystallography)
O75154	P62491	RAB11FIP3	RAB11A	psi-mi:MI:0114(x-ray crystallography)
Q9BXF6	Q9Y496	RAB11FIP5	KIF3A	psi-mi:MI:0096(pull down)
Q9BXF6	P62491	RAB11FIP5	RAB11A	psi-mi:MI:0096(pull down)
Q6IQ22	P61026	RAB12	RAB10	psi-mi:MI:0007(anti tag coimmunoprecipitation)
Q6IQ22	Q14964	RAB12	RAB39A	psi-mi:MI:0007(anti tag coimmunoprecipitation)
P61106	Q6XUX3	RAB14	DSTYK	psi-mi:MI:0006(anti bait coimmunoprecipitation)
P61106	P30480	RAB14	HLA-B	psi-mi:MI:0006(anti bait coimmunoprecipitation)
P61106	Q14164	RAB14	IKBKE	psi-mi:MI:0006(anti bait coimmunoprecipitation)
P61106	P40337	RAB14	VHL	psi-mi:MI:0006(anti bait coimmunoprecipitation)
P61106	Q01968	RAB14	OCRL	psi-mi:MI:0096(pull down)
P62820	P42345	RAB1A	MTOR	psi-mi:MI:0006(anti bait coimmunoprecipitation)
P62820	Q8N122	RAB1A	RPTOR	psi-mi:MI:0006(anti bait coimmunoprecipitation)
P62820	Q96LT7	RAB1A	C9orf72	psi-mi:MI:0007(anti tag coimmunoprecipitation)
P62820	Q96LT7	RAB1A	C9orf72	psi-mi:MI:0007(anti tag coimmunoprecipitation)
P62820	P42345	RAB1A	MTOR	psi-mi:MI:0007(anti tag coimmunoprecipitation)
P62820	Q8N122	RAB1A	RPTOR	psi-mi:MI:0007(anti tag coimmunoprecipitation)
P62820	Q08379	RAB1A	GOLGA2	psi-mi:MI:0096(pull down)
P62820	Q14789	RAB1A	GOLGB1	psi-mi:MI:0096(pull down)
P62820	Q14789	RAB1A	GOLGB1	psi-mi:MI:0096(pull down)
P62820	Q01968	RAB1A	OCRL	psi-mi:MI:0096(pull down)
P62820	Q01968	RAB1A	OCRL	psi-mi:MI:0096(pull down)
P62820	Q01968	RAB1A	OCRL	psi-mi:MI:0096(pull down)
P62820	O60763	RAB1A	USO1	psi-mi:MI:0096(pull down)
P62820	O60763	RAB1A	USO1	psi-mi:MI:0096(pull down)
P62820	Q01968	RAB1A	OCRL	psi-mi:MI:0411(enzyme linked immunosorbent assay)
P62820	Q5S007	RAB1A	LRRK2	psi-mi:MI:0424(protein kinase assay)
Q9H0U4	P30480	RAB1B	HLA-B	psi-mi:MI:0006(anti bait coimmunoprecipitation)
Q9H0U4	P23508	RAB1B	MCC	psi-mi:MI:0006(anti bait coimmunoprecipitation)
Q9H0U4	P40337	RAB1B	VHL	psi-mi:MI:0006(anti bait coimmunoprecipitation)
Q9H0U4	Q9UKF7	RAB1B	PITPNC1	psi-mi:MI:0007(anti tag coimmunoprecipitation)
Q9H0U4	Q8N2Y8	RAB1B	RUSC2	psi-mi:MI:0096(pull down)
Q9H0U4	Q5S007	RAB1B	LRRK2	psi-mi:MI:0424(protein kinase assay)
Q9H0U4	Q5S007	RAB1B	LRRK2	psi-mi:MI:0424(protein kinase assay)
Q9H0U4	Q5S007	RAB1B	LRRK2	psi-mi:MI:0424(protein kinase assay)
O14966	O14976	RAB29	GAK	psi-mi:MI:0007(anti tag coimmunoprecipitation)
O14966	A8K7Q2	RAB29	HSPA8	psi-mi:MI:0007(anti tag coimmunoprecipitation)
O14966	Q5S007	RAB29	LRRK2	psi-mi:MI:0007(anti tag coimmunoprecipitation)
O14966	Q5S007	RAB29	LRRK2	psi-mi:MI:0007(anti tag coimmunoprecipitation)
P61019	P11171	RAB2A	EPB41	psi-mi:MI:0006(anti bait coimmunoprecipitation)
P61019	P30480	RAB2A	HLA-B	psi-mi:MI:0006(anti bait coimmunoprecipitation)
P61019	P23508	RAB2A	MCC	psi-mi:MI:0006(anti bait coimmunoprecipitation)
P61019	P40337	RAB2A	VHL	psi-mi:MI:0006(anti bait coimmunoprecipitation)
P61019	P60709	RAB2A	ACTB	psi-mi:MI:0007(anti tag coimmunoprecipitation)
P61019	Q02952	RAB2A	AKAP12	psi-mi:MI:0007(anti tag coimmunoprecipitation)
P61019	P00966	RAB2A	ASS1	psi-mi:MI:0007(anti tag coimmunoprecipitation)
P61019	P61421	RAB2A	ATP6V0D1	psi-mi:MI:0007(anti tag coimmunoprecipitation)
P61019	P21281	RAB2A	ATP6V1B2	psi-mi:MI:0007(anti tag coimmunoprecipitation)
P61019	Q9UI12	RAB2A	ATP6V1H	psi-mi:MI:0007(anti tag coimmunoprecipitation)
P61019	C9JKI3	RAB2A	CAV1	psi-mi:MI:0007(anti tag coimmunoprecipitation)
P61019	Q6NZI2	RAB2A	CAVIN1	psi-mi:MI:0007(anti tag coimmunoprecipitation)
P61019	Q9NX63	RAB2A	CHCHD3	psi-mi:MI:0007(anti tag coimmunoprecipitation)
P61019	O43633	RAB2A	CHMP2A	psi-mi:MI:0007(anti tag coimmunoprecipitation)
P61019	P09669	RAB2A	COX6C	psi-mi:MI:0007(anti tag coimmunoprecipitation)
P61019	Q96HP0	RAB2A	DOCK6	psi-mi:MI:0007(anti tag coimmunoprecipitation)
P61019	O75955	RAB2A	FLOT1	psi-mi:MI:0007(anti tag coimmunoprecipitation)
P61019	Q14254	RAB2A	FLOT2	psi-mi:MI:0007(anti tag coimmunoprecipitation)
P61019	P35232	RAB2A	PHB	psi-mi:MI:0007(anti tag coimmunoprecipitation)
P61019	Q99623	RAB2A	PHB2	psi-mi:MI:0007(anti tag coimmunoprecipitation)
P61019	Q9UHX1	RAB2A	PUF60	psi-mi:MI:0007(anti tag coimmunoprecipitation)
P61019	P51149	RAB2A	RAB7A	psi-mi:MI:0007(anti tag coimmunoprecipitation)
P61019	P35610	RAB2A	SOAT1	psi-mi:MI:0007(anti tag coimmunoprecipitation)
P61019	Q9BVC6	RAB2A	TMEM109	psi-mi:MI:0007(anti tag coimmunoprecipitation)
Q14964	Q14457	RAB39A	BECN1	psi-mi:MI:0006(anti bait coimmunoprecipitation)
Q96QF0	P62491	RAB3IP	RAB11A	psi-mi:MI:0065(isothermal titration calorimetry)
Q96QF0	P62491	RAB3IP	RAB11A	psi-mi:MI:0096(pull down)
Q96QF0	P62491	RAB3IP	RAB11A	psi-mi:MI:0096(pull down)
Q96QF0	P62491	RAB3IP	RAB11A	psi-mi:MI:0096(pull down)
Q96QF0	P62491	RAB3IP	RAB11A	psi-mi:MI:0096(pull down)
Q96QF0	P62491	RAB3IP	RAB11A	psi-mi:MI:0096(pull down)
Q96QF0	P62491	RAB3IP	RAB11A	psi-mi:MI:0096(pull down)
Q96QF0	P61006	RAB3IP	RAB8A	psi-mi:MI:0096(pull down)
Q96QF0	P62491	RAB3IP	RAB11A	psi-mi:MI:0114(x-ray crystallography)
Q96QF0	P61006	RAB3IP	RAB8A	psi-mi:MI:0676(tandem affinity purification)
Q86YS6	P04792	RAB43	HSPB1	psi-mi:MI:0006(anti bait coimmunoprecipitation)
P20338	P31150	RAB4A	GDI1	psi-mi:MI:0007(anti tag coimmunoprecipitation)
P20338	P31150	RAB4A	GDI1	psi-mi:MI:0055(fluorescent resonance energy transfer)
P20338	P50395	RAB4A	GDI2	psi-mi:MI:0055(fluorescent resonance energy transfer)
P61018	P61106	RAB4B	RAB14	psi-mi:MI:0007(anti tag coimmunoprecipitation)
P51148	Q86YS6	RAB5C	RAB43	psi-mi:MI:0007(anti tag coimmunoprecipitation)
P20340	P30480	RAB6A	HLA-B	psi-mi:MI:0006(anti bait coimmunoprecipitation)
P20340	P40337	RAB6A	VHL	psi-mi:MI:0006(anti bait coimmunoprecipitation)
P20340	Q14203	RAB6A	DCTN1	psi-mi:MI:0096(pull down)
P20340	Q01968	RAB6A	OCRL	psi-mi:MI:0096(pull down)
P20340	Q01968	RAB6A	OCRL	psi-mi:MI:0096(pull down)
P20340	Q01968	RAB6A	OCRL	psi-mi:MI:0411(enzyme linked immunosorbent assay)
P61006	P11171	RAB8A	EPB41	psi-mi:MI:0006(anti bait coimmunoprecipitation)
P61006	Q8IWV1	RAB8A	LAX1	psi-mi:MI:0006(anti bait coimmunoprecipitation)
P61006	P61026	RAB8A	RAB10	psi-mi:MI:0006(anti bait coimmunoprecipitation)
P61006	P61026	RAB8A	RAB10	psi-mi:MI:0006(anti bait coimmunoprecipitation)
P61006	P84077	RAB8A	ARF1	psi-mi:MI:0007(anti tag coimmunoprecipitation)
P61006	P84077	RAB8A	ARF1	psi-mi:MI:0007(anti tag coimmunoprecipitation)
P61006	P18085	RAB8A	ARF4	psi-mi:MI:0007(anti tag coimmunoprecipitation)
P61006	P84085	RAB8A	ARF5	psi-mi:MI:0007(anti tag coimmunoprecipitation)
P61006	P84085	RAB8A	ARF5	psi-mi:MI:0007(anti tag coimmunoprecipitation)
P61006	P40616	RAB8A	ARL1	psi-mi:MI:0007(anti tag coimmunoprecipitation)
P61006	Q9NVJ2	RAB8A	ARL8B	psi-mi:MI:0007(anti tag coimmunoprecipitation)
P61006	P24386	RAB8A	CHM	psi-mi:MI:0007(anti tag coimmunoprecipitation)
P61006	P24386	RAB8A	CHM	psi-mi:MI:0007(anti tag coimmunoprecipitation)
P61006	P26374	RAB8A	CHML	psi-mi:MI:0007(anti tag coimmunoprecipitation)
P61006	P26374	RAB8A	CHML	psi-mi:MI:0007(anti tag coimmunoprecipitation)
P61006	O14641	RAB8A	DVL2	psi-mi:MI:0007(anti tag coimmunoprecipitation)
P61006	O14641	RAB8A	DVL2	psi-mi:MI:0007(anti tag coimmunoprecipitation)
P61006	O75477	RAB8A	ERLIN1	psi-mi:MI:0007(anti tag coimmunoprecipitation)
P61006	O94905	RAB8A	ERLIN2	psi-mi:MI:0007(anti tag coimmunoprecipitation)
P61006	O94905	RAB8A	ERLIN2	psi-mi:MI:0007(anti tag coimmunoprecipitation)
P61006	Q9BSJ8	RAB8A	ESYT1	psi-mi:MI:0007(anti tag coimmunoprecipitation)
P61006	Q92538	RAB8A	GBF1	psi-mi:MI:0007(anti tag coimmunoprecipitation)
P61006	Q92538	RAB8A	GBF1	psi-mi:MI:0007(anti tag coimmunoprecipitation)
P61006	P31150	RAB8A	GDI1	psi-mi:MI:0007(anti tag coimmunoprecipitation)
P61006	P31150	RAB8A	GDI1	psi-mi:MI:0007(anti tag coimmunoprecipitation)
P61006	P31150	RAB8A	GDI1	psi-mi:MI:0007(anti tag coimmunoprecipitation)
P61006	P31150	RAB8A	GDI1	psi-mi:MI:0007(anti tag coimmunoprecipitation)
P61006	P50395	RAB8A	GDI2	psi-mi:MI:0007(anti tag coimmunoprecipitation)
P61006	P50395	RAB8A	GDI2	psi-mi:MI:0007(anti tag coimmunoprecipitation)
P61006	P50395	RAB8A	GDI2	psi-mi:MI:0007(anti tag coimmunoprecipitation)
P61006	P50395	RAB8A	GDI2	psi-mi:MI:0007(anti tag coimmunoprecipitation)
P61006	P32019	RAB8A	INPP5B	psi-mi:MI:0007(anti tag coimmunoprecipitation)
P61006	P32019	RAB8A	INPP5B	psi-mi:MI:0007(anti tag coimmunoprecipitation)
P61006	P32019	RAB8A	INPP5B	psi-mi:MI:0007(anti tag coimmunoprecipitation)
P61006	Q5S007	RAB8A	LRRK2	psi-mi:MI:0007(anti tag coimmunoprecipitation)
P61006	Q5S007	RAB8A	LRRK2	psi-mi:MI:0007(anti tag coimmunoprecipitation)
P61006	Q8TDZ2	RAB8A	MICAL1	psi-mi:MI:0007(anti tag coimmunoprecipitation)
P61006	Q8TDZ2	RAB8A	MICAL1	psi-mi:MI:0007(anti tag coimmunoprecipitation)
P61006	Q7RTP6	RAB8A	MICAL3	psi-mi:MI:0007(anti tag coimmunoprecipitation)
P61006	Q7RTP6	RAB8A	MICAL3	psi-mi:MI:0007(anti tag coimmunoprecipitation)
P61006	Q8N3F8	RAB8A	MICALL1	psi-mi:MI:0007(anti tag coimmunoprecipitation)
P61006	Q8N3F8	RAB8A	MICALL1	psi-mi:MI:0007(anti tag coimmunoprecipitation)
P61006	Q8IY33	RAB8A	MICALL2	psi-mi:MI:0007(anti tag coimmunoprecipitation)
P61006	Q8IY33	RAB8A	MICALL2	psi-mi:MI:0007(anti tag coimmunoprecipitation)
P61006	Q01968	RAB8A	OCRL	psi-mi:MI:0007(anti tag coimmunoprecipitation)
P61006	Q01968	RAB8A	OCRL	psi-mi:MI:0007(anti tag coimmunoprecipitation)
P61006	Q9NP72	RAB8A	RAB18	psi-mi:MI:0007(anti tag coimmunoprecipitation)
P61006	Q9NP72	RAB8A	RAB18	psi-mi:MI:0007(anti tag coimmunoprecipitation)
P61006	P62820	RAB8A	RAB1A	psi-mi:MI:0007(anti tag coimmunoprecipitation)
P61006	P62820	RAB8A	RAB1A	psi-mi:MI:0007(anti tag coimmunoprecipitation)
P61006	Q14964	RAB8A	RAB39A	psi-mi:MI:0007(anti tag coimmunoprecipitation)
P61006	Q14964	RAB8A	RAB39A	psi-mi:MI:0007(anti tag coimmunoprecipitation)
P61006	Q14964	RAB8A	RAB39A	psi-mi:MI:0007(anti tag coimmunoprecipitation)
P61006	Q14964	RAB8A	RAB39A	psi-mi:MI:0007(anti tag coimmunoprecipitation)
P61006	Q96QF0	RAB8A	RAB3IP	psi-mi:MI:0007(anti tag coimmunoprecipitation)
P61006	Q96QF0	RAB8A	RAB3IP	psi-mi:MI:0007(anti tag coimmunoprecipitation)
P61006	P20340	RAB8A	RAB6A	psi-mi:MI:0007(anti tag coimmunoprecipitation)
P61006	P20340	RAB8A	RAB6A	psi-mi:MI:0007(anti tag coimmunoprecipitation)
P61006	Q9H0N0	RAB8A	RAB6C	psi-mi:MI:0007(anti tag coimmunoprecipitation)
P61006	Q92930	RAB8A	RAB8B	psi-mi:MI:0007(anti tag coimmunoprecipitation)
P61006	Q92930	RAB8A	RAB8B	psi-mi:MI:0007(anti tag coimmunoprecipitation)
P61006	Q92696	RAB8A	RABGGTA	psi-mi:MI:0007(anti tag coimmunoprecipitation)
P61006	Q92696	RAB8A	RABGGTA	psi-mi:MI:0007(anti tag coimmunoprecipitation)
P61006	Q92696	RAB8A	RABGGTA	psi-mi:MI:0007(anti tag coimmunoprecipitation)
P61006	P53611	RAB8A	RABGGTB	psi-mi:MI:0007(anti tag coimmunoprecipitation)
P61006	P53611	RAB8A	RABGGTB	psi-mi:MI:0007(anti tag coimmunoprecipitation)
P61006	P47224	RAB8A	RABIF	psi-mi:MI:0007(anti tag coimmunoprecipitation)
P61006	P47224	RAB8A	RABIF	psi-mi:MI:0007(anti tag coimmunoprecipitation)
P61006	Q96C24	RAB8A	SYTL4	psi-mi:MI:0007(anti tag coimmunoprecipitation)
P61006	Q96C24	RAB8A	SYTL4	psi-mi:MI:0007(anti tag coimmunoprecipitation)
P61006	Q8TC07	RAB8A	TBC1D15	psi-mi:MI:0007(anti tag coimmunoprecipitation)
P61006	Q8TC07	RAB8A	TBC1D15	psi-mi:MI:0007(anti tag coimmunoprecipitation)
P61006	Q8TC07	RAB8A	TBC1D15	psi-mi:MI:0007(anti tag coimmunoprecipitation)
P61006	Q0IIM8	RAB8A	TBC1D8B	psi-mi:MI:0007(anti tag coimmunoprecipitation)
P61006	Q66K14	RAB8A	TBC1D9B	psi-mi:MI:0007(anti tag coimmunoprecipitation)
P61006	Q66K14	RAB8A	TBC1D9B	psi-mi:MI:0007(anti tag coimmunoprecipitation)
P61006	Q9P0L0	RAB8A	VAPA	psi-mi:MI:0007(anti tag coimmunoprecipitation)
P61006	Q562E7	RAB8A	WDR81	psi-mi:MI:0007(anti tag coimmunoprecipitation)
P61006	Q562E7	RAB8A	WDR81	psi-mi:MI:0007(anti tag coimmunoprecipitation)
P61006	A4D1P6	RAB8A	WDR91	psi-mi:MI:0007(anti tag coimmunoprecipitation)
P61006	A4D1P6	RAB8A	WDR91	psi-mi:MI:0007(anti tag coimmunoprecipitation)
P61006	P47224	RAB8A	RABIF	psi-mi:MI:0055(fluorescent resonance energy transfer)
P61006	Q01968	RAB8A	OCRL	psi-mi:MI:0096(pull down)
P61006	Q5S007	RAB8A	LRRK2	psi-mi:MI:0424(protein kinase assay)
P61006	Q5S007	RAB8A	LRRK2	psi-mi:MI:0424(protein kinase assay)
P61006	Q5S007	RAB8A	LRRK2	psi-mi:MI:0424(protein kinase assay)
P61006	Q5S007	RAB8A	LRRK2	psi-mi:MI:0424(protein kinase assay)
P61006	Q9NX63	RAB8A	CHCHD3	psi-mi:MI:0676(tandem affinity purification)
P61006	O00471	RAB8A	EXOC5	psi-mi:MI:0676(tandem affinity purification)
P61006	O95299	RAB8A	NDUFA10	psi-mi:MI:0676(tandem affinity purification)
P61006	Q16718	RAB8A	NDUFA5	psi-mi:MI:0676(tandem affinity purification)
P61006	Q9Y512	RAB8A	SAMM50	psi-mi:MI:0676(tandem affinity purification)
P61006	P27105	RAB8A	STOM	psi-mi:MI:0676(tandem affinity purification)
P61006	Q96QF0	RAB8A	RAB3IP	psi-mi:MI:0949(gdp/gtp exchange assay)
P61006	Q96QF0	RAB8A	RAB3IP	psi-mi:MI:0949(gdp/gtp exchange assay)
P47224	P61006	RABIF	RAB8A	psi-mi:MI:0114(x-ray crystallography)
Q9H0H5	Q02241	RACGAP1	KIF23	psi-mi:MI:0006(anti bait coimmunoprecipitation)
Q9H0H5	Q02241	RACGAP1	KIF23	psi-mi:MI:0006(anti bait coimmunoprecipitation)
Q9H0H5	Q02241	RACGAP1	KIF23	psi-mi:MI:0006(anti bait coimmunoprecipitation)
Q9H0H5	Q02241	RACGAP1	KIF23	psi-mi:MI:0007(anti tag coimmunoprecipitation)
Q9H0H5	Q02241	RACGAP1	KIF23	psi-mi:MI:0096(pull down)
Q8IUH3	Q14807	RBM45	KIF22	psi-mi:MI:0007(anti tag coimmunoprecipitation)
Q9Y580	O60333	RBM7	KIF1B	psi-mi:MI:0007(anti tag coimmunoprecipitation)
Q06330	Q99661	RBPJ	KIF2C	psi-mi:MI:0676(tandem affinity purification)
Q8IXI2	O60282	RHOT1	KIF5C	psi-mi:MI:0007(anti tag coimmunoprecipitation)
Q6R327	P62820	RICTOR	RAB1A	psi-mi:MI:0007(anti tag coimmunoprecipitation)
Q6NUQ1	P35606	RINT1	COPB2	psi-mi:MI:0006(anti bait coimmunoprecipitation)
Q6NUQ1	P35606	RINT1	COPB2	psi-mi:MI:0006(anti bait coimmunoprecipitation)
Q6NUQ1	P35606	RINT1	COPB2	psi-mi:MI:0006(anti bait coimmunoprecipitation)
Q6NUQ1	A2RRP1	RINT1	NBAS	psi-mi:MI:0006(anti bait coimmunoprecipitation)
Q6NUQ1	A2RRP1	RINT1	NBAS	psi-mi:MI:0006(anti bait coimmunoprecipitation)
Q6NUQ1	A2RRP1	RINT1	NBAS	psi-mi:MI:0006(anti bait coimmunoprecipitation)
Q6NUQ1	A2RRP1	RINT1	NBAS	psi-mi:MI:0006(anti bait coimmunoprecipitation)
Q6NUQ1	A2RRP1	RINT1	NBAS	psi-mi:MI:0006(anti bait coimmunoprecipitation)
Q6NUQ1	A2RRP1	RINT1	NBAS	psi-mi:MI:0006(anti bait coimmunoprecipitation)
Q6NUQ1	Q9P2W9	RINT1	STX18	psi-mi:MI:0006(anti bait coimmunoprecipitation)
Q6NUQ1	Q9P2Y5	RINT1	UVRAG	psi-mi:MI:0006(anti bait coimmunoprecipitation)
Q6NUQ1	Q9P2Y5	RINT1	UVRAG	psi-mi:MI:0006(anti bait coimmunoprecipitation)
Q6NUQ1	Q9P2Y5	RINT1	UVRAG	psi-mi:MI:0006(anti bait coimmunoprecipitation)
Q6NUQ1	O43264	RINT1	ZW10	psi-mi:MI:0006(anti bait coimmunoprecipitation)
Q6NUQ1	O43264	RINT1	ZW10	psi-mi:MI:0006(anti bait coimmunoprecipitation)
Q6NUQ1	O43264	RINT1	ZW10	psi-mi:MI:0006(anti bait coimmunoprecipitation)
Q6NUQ1	O43264	RINT1	ZW10	psi-mi:MI:0006(anti bait coimmunoprecipitation)
Q6NUQ1	O43264	RINT1	ZW10	psi-mi:MI:0006(anti bait coimmunoprecipitation)
Q6NUQ1	O43264	RINT1	ZW10	psi-mi:MI:0006(anti bait coimmunoprecipitation)
Q6NUQ1	O43264	RINT1	ZW10	psi-mi:MI:0006(anti bait coimmunoprecipitation)
Q6NUQ1	O43264	RINT1	ZW10	psi-mi:MI:0006(anti bait coimmunoprecipitation)
Q6NUQ1	O43264	RINT1	ZW10	psi-mi:MI:0006(anti bait coimmunoprecipitation)
Q6NUQ1	O43264	RINT1	ZW10	psi-mi:MI:0006(anti bait coimmunoprecipitation)
Q6NUQ1	O43264	RINT1	ZW10	psi-mi:MI:0006(anti bait coimmunoprecipitation)
Q6NUQ1	O43264	RINT1	ZW10	psi-mi:MI:0006(anti bait coimmunoprecipitation)
Q6NUQ1	A2RRP1	RINT1	NBAS	psi-mi:MI:0007(anti tag coimmunoprecipitation)
Q6NUQ1	O43264	RINT1	ZW10	psi-mi:MI:0007(anti tag coimmunoprecipitation)
Q6NUQ1	O43264	RINT1	ZW10	psi-mi:MI:0007(anti tag coimmunoprecipitation)
Q05823	Q02241	RNASEL	KIF23	psi-mi:MI:0006(anti bait coimmunoprecipitation)
Q8NCN4	Q9BW19	RNF169	KIFC1	psi-mi:MI:0096(pull down)
Q15287	Q02241	RNPS1	KIF23	psi-mi:MI:0007(anti tag coimmunoprecipitation)
P27694	Q9Y496	RPA1	KIF3A	psi-mi:MI:0007(anti tag coimmunoprecipitation)
Q68CZ1	O00139	RPGRIP1L	KIF2A	psi-mi:MI:0007(anti tag coimmunoprecipitation)
P27635	Q14807	RPL10	KIF22	psi-mi:MI:0007(anti tag coimmunoprecipitation)
Q8N122	P62820	RPTOR	RAB1A	psi-mi:MI:0007(anti tag coimmunoprecipitation)
Q14684	Q02241	RRP1B	KIF23	psi-mi:MI:0007(anti tag coimmunoprecipitation)
Q6SPF0	Q8NI77	SAMD1	KIF18A	psi-mi:MI:0007(anti tag coimmunoprecipitation)
Q8WVM8	Q96JB2	SCFD1	COG3	psi-mi:MI:0007(anti tag coimmunoprecipitation)
Q8WVM8	Q9H9E3	SCFD1	COG4	psi-mi:MI:0007(anti tag coimmunoprecipitation)
Q8WVM8	Q9H9E3	SCFD1	COG4	psi-mi:MI:0007(anti tag coimmunoprecipitation)
Q8WVM8	P83436	SCFD1	COG7	psi-mi:MI:0007(anti tag coimmunoprecipitation)
Q8WVM8	Q9H9E3	SCFD1	COG4	psi-mi:MI:0096(pull down)
Q8WVM8	Q9H9E3	SCFD1	COG4	psi-mi:MI:0096(pull down)
Q96NL6	Q02241	SCLT1	KIF23	psi-mi:MI:0007(anti tag coimmunoprecipitation)
Q96NL6	Q6NUQ1	SCLT1	RINT1	psi-mi:MI:0007(anti tag coimmunoprecipitation)
P31947	P33176	SFN	KIF5B	psi-mi:MI:0676(tandem affinity purification)
Q5FBB7	Q99661	SGO1	KIF2C	psi-mi:MI:0007(anti tag coimmunoprecipitation)
Q562F6	Q99661	SGO2	KIF2C	psi-mi:MI:0006(anti bait coimmunoprecipitation)
Q96BD8	O00139	SKA1	KIF2A	psi-mi:MI:0007(anti tag coimmunoprecipitation)
O00400	P61106	SLC33A1	RAB14	psi-mi:MI:0007(anti tag coimmunoprecipitation)
O00400	O43264	SLC33A1	ZW10	psi-mi:MI:0007(anti tag coimmunoprecipitation)
Q13573	P52732	SNW1	KIF11	psi-mi:MI:0006(anti bait coimmunoprecipitation)
Q13573	Q7Z4S6	SNW1	KIF21A	psi-mi:MI:0006(anti bait coimmunoprecipitation)
Q13573	Q86VH2	SNW1	KIF27	psi-mi:MI:0006(anti bait coimmunoprecipitation)
Q13573	Q99661	SNW1	KIF2C	psi-mi:MI:0006(anti bait coimmunoprecipitation)
Q13573	O95239	SNW1	KIF4A	psi-mi:MI:0006(anti bait coimmunoprecipitation)
Q8N0X7	P33176	SPART	KIF5B	psi-mi:MI:0676(tandem affinity purification)
P40763	Q86VH2	STAT3	KIF27	psi-mi:MI:0676(tandem affinity purification)
O95793	Q8N4N8	STAU1	KIF2B	psi-mi:MI:0004(affinity chromatography technology)
Q15831	Q02241	STK11	KIF23	psi-mi:MI:0007(anti tag coimmunoprecipitation)
Q13188	Q99661	STK3	KIF2C	psi-mi:MI:0007(anti tag coimmunoprecipitation)
Q13043	O00139	STK4	KIF2A	psi-mi:MI:0007(anti tag coimmunoprecipitation)
Q13043	Q99661	STK4	KIF2C	psi-mi:MI:0007(anti tag coimmunoprecipitation)
P27105	O43264	STOM	ZW10	psi-mi:MI:0676(tandem affinity purification)
Q9P2W9	Q6NUQ1	STX18	RINT1	psi-mi:MI:0006(anti bait coimmunoprecipitation)
Q9P2W9	Q6NUQ1	STX18	RINT1	psi-mi:MI:0006(anti bait coimmunoprecipitation)
Q9P2W9	O43264	STX18	ZW10	psi-mi:MI:0006(anti bait coimmunoprecipitation)
Q9P2W9	O43264	STX18	ZW10	psi-mi:MI:0006(anti bait coimmunoprecipitation)
Q13190	Q9H9E3	STX5	COG4	psi-mi:MI:0096(pull down)
Q9Y6A5	P52732	TACC3	KIF11	psi-mi:MI:0007(anti tag coimmunoprecipitation)
Q9HA65	P61006	TBC1D17	RAB8A	psi-mi:MI:0007(anti tag coimmunoprecipitation)
Q15562	Q14807	TEAD2	KIF22	psi-mi:MI:0676(tandem affinity purification)
P02786	P61006	TFRC	RAB8A	psi-mi:MI:0096(pull down)
Q96FV9	O43896	THOC1	KIF1C	psi-mi:MI:0007(anti tag coimmunoprecipitation)
Q8NI27	O43896	THOC2	KIF1C	psi-mi:MI:0007(anti tag coimmunoprecipitation)
Q13769	O43896	THOC5	KIF1C	psi-mi:MI:0007(anti tag coimmunoprecipitation)
Q9NWD8	O75037	TMEM248	KIF21B	psi-mi:MI:0007(anti tag coimmunoprecipitation)
Q96KP6	P52732	TNIP3	KIF11	psi-mi:MI:0007(anti tag coimmunoprecipitation)
Q92973	Q9P2E2	TNPO1	KIF17	psi-mi:MI:0007(anti tag coimmunoprecipitation)
Q9H3D4	Q02224	TP63	CENPE	psi-mi:MI:0007(anti tag coimmunoprecipitation)
Q9UPV9	P33176	TRAK1	KIF5B	psi-mi:MI:0006(anti bait coimmunoprecipitation)
Q9UPV9	P33176	TRAK1	KIF5B	psi-mi:MI:0006(anti bait coimmunoprecipitation)
Q7L0Y3	Q9BW19	TRMT10C	KIFC1	psi-mi:MI:0007(anti tag coimmunoprecipitation)
Q8N4P2	P61026	TTC30B	RAB10	psi-mi:MI:0676(tandem affinity purification)
Q9UNY4	O95239	TTF2	KIF4A	psi-mi:MI:0006(anti bait coimmunoprecipitation)
P33981	O00139	TTK	KIF2A	psi-mi:MI:0007(anti tag coimmunoprecipitation)
Q71U36	Q15058	TUBA1A	KIF14	psi-mi:MI:0096(pull down)
Q71U36	Q15058	TUBA1A	KIF14	psi-mi:MI:0096(pull down)
Q71U36	O00139	TUBA1A	KIF2A	psi-mi:MI:0096(pull down)
Q71U36	O00139	TUBA1A	KIF2A	psi-mi:MI:0096(pull down)
Q71U36	O00139	TUBA1A	KIF2A	psi-mi:MI:0096(pull down)
Q71U36	O95239	TUBA1A	KIF4A	psi-mi:MI:0096(pull down)
Q71U36	O95239	TUBA1A	KIF4A	psi-mi:MI:0096(pull down)
Q9BQE3	Q15058	TUBA1C	KIF14	psi-mi:MI:0007(anti tag coimmunoprecipitation)
P63279	O60333	UBE2I	KIF1B	psi-mi:MI:0007(anti tag coimmunoprecipitation)
Q8IYT8	P52732	ULK2	KIF11	psi-mi:MI:0007(anti tag coimmunoprecipitation)
Q9NZ43	Q6NUQ1	USE1	RINT1	psi-mi:MI:0006(anti bait coimmunoprecipitation)
Q9NZ43	Q6NUQ1	USE1	RINT1	psi-mi:MI:0006(anti bait coimmunoprecipitation)
Q9NZ43	Q6NUQ1	USE1	RINT1	psi-mi:MI:0006(anti bait coimmunoprecipitation)
Q9NZ43	O43264	USE1	ZW10	psi-mi:MI:0006(anti bait coimmunoprecipitation)
Q9NZ43	O43264	USE1	ZW10	psi-mi:MI:0006(anti bait coimmunoprecipitation)
Q9NZ43	O43264	USE1	ZW10	psi-mi:MI:0006(anti bait coimmunoprecipitation)
Q9NZ43	Q6NUQ1	USE1	RINT1	psi-mi:MI:0007(anti tag coimmunoprecipitation)
Q9NZ43	O43264	USE1	ZW10	psi-mi:MI:0007(anti tag coimmunoprecipitation)
Q9NZ43	Q6NUQ1	USE1	RINT1	psi-mi:MI:0096(pull down)
Q9NZ43	Q6NUQ1	USE1	RINT1	psi-mi:MI:0096(pull down)
Q9NZ43	O43264	USE1	ZW10	psi-mi:MI:0096(pull down)
P22415	O75037	USF1	KIF21B	psi-mi:MI:0007(anti tag coimmunoprecipitation)
Q9UPT9	Q2M1P5	USP22	KIF7	psi-mi:MI:0007(anti tag coimmunoprecipitation)
Q9UPT9	Q2M1P5	USP22	KIF7	psi-mi:MI:0007(anti tag coimmunoprecipitation)
Q93009	Q02241	USP7	KIF23	psi-mi:MI:0007(anti tag coimmunoprecipitation)
Q93009	Q9Y496	USP7	KIF3A	psi-mi:MI:0007(anti tag coimmunoprecipitation)
Q5W0Q7	P33176	USPL1	KIF5B	psi-mi:MI:0007(anti tag coimmunoprecipitation)
Q9P2Y5	Q6NUQ1	UVRAG	RINT1	psi-mi:MI:0006(anti bait coimmunoprecipitation)
Q9P2Y5	Q6NUQ1	UVRAG	RINT1	psi-mi:MI:0006(anti bait coimmunoprecipitation)
Q9P2Y5	Q6NUQ1	UVRAG	RINT1	psi-mi:MI:0006(anti bait coimmunoprecipitation)
Q9P2Y5	Q6NUQ1	UVRAG	RINT1	psi-mi:MI:0006(anti bait coimmunoprecipitation)
Q9P2Y5	Q6NUQ1	UVRAG	RINT1	psi-mi:MI:0006(anti bait coimmunoprecipitation)
Q9P2Y5	Q6NUQ1	UVRAG	RINT1	psi-mi:MI:0006(anti bait coimmunoprecipitation)
Q9P2Y5	Q6NUQ1	UVRAG	RINT1	psi-mi:MI:0006(anti bait coimmunoprecipitation)
Q9P2Y5	O43264	UVRAG	ZW10	psi-mi:MI:0006(anti bait coimmunoprecipitation)
Q9P2Y5	O43264	UVRAG	ZW10	psi-mi:MI:0006(anti bait coimmunoprecipitation)
Q9P2Y5	O43264	UVRAG	ZW10	psi-mi:MI:0006(anti bait coimmunoprecipitation)
Q9P2Y5	O43264	UVRAG	ZW10	psi-mi:MI:0006(anti bait coimmunoprecipitation)
Q9P2Y5	O43264	UVRAG	ZW10	psi-mi:MI:0006(anti bait coimmunoprecipitation)
Q9P2Y5	O43264	UVRAG	ZW10	psi-mi:MI:0006(anti bait coimmunoprecipitation)
Q9P2Y5	P33176	UVRAG	KIF5B	psi-mi:MI:0007(anti tag coimmunoprecipitation)
Q9P2Y5	Q14964	UVRAG	RAB39A	psi-mi:MI:0007(anti tag coimmunoprecipitation)
Q9P2Y5	Q6NUQ1	UVRAG	RINT1	psi-mi:MI:0007(anti tag coimmunoprecipitation)
Q9P2Y5	Q6NUQ1	UVRAG	RINT1	psi-mi:MI:0007(anti tag coimmunoprecipitation)
Q9P2Y5	Q6NUQ1	UVRAG	RINT1	psi-mi:MI:0007(anti tag coimmunoprecipitation)
Q9P2Y5	Q6NUQ1	UVRAG	RINT1	psi-mi:MI:0007(anti tag coimmunoprecipitation)
Q9P2Y5	Q6NUQ1	UVRAG	RINT1	psi-mi:MI:0007(anti tag coimmunoprecipitation)
Q9P2Y5	Q6NUQ1	UVRAG	RINT1	psi-mi:MI:0007(anti tag coimmunoprecipitation)
Q9P2Y5	O43264	UVRAG	ZW10	psi-mi:MI:0007(anti tag coimmunoprecipitation)
Q9P2Y5	O43264	UVRAG	ZW10	psi-mi:MI:0007(anti tag coimmunoprecipitation)
Q9P2Y5	O43264	UVRAG	ZW10	psi-mi:MI:0007(anti tag coimmunoprecipitation)
Q9P2Y5	Q6NUQ1	UVRAG	RINT1	psi-mi:MI:0096(pull down)
Q4G0F5	O60333	VPS26B	KIF1B	psi-mi:MI:0007(anti tag coimmunoprecipitation)
Q4G0F5	Q12840	VPS26B	KIF5A	psi-mi:MI:0007(anti tag coimmunoprecipitation)
Q9UID3	Q9BVG8	VPS51	KIFC3	psi-mi:MI:0676(tandem affinity purification)
O43379	Q02241	WDR62	KIF23	psi-mi:MI:0006(anti bait coimmunoprecipitation)
O43542	O43264	XRCC3	ZW10	psi-mi:MI:0007(anti tag coimmunoprecipitation)
P31946	O60333	YWHAB	KIF1B	psi-mi:MI:0007(anti tag coimmunoprecipitation)
P31946	O43896	YWHAB	KIF1C	psi-mi:MI:0007(anti tag coimmunoprecipitation)
P31946	Q02241	YWHAB	KIF23	psi-mi:MI:0019(coimmunoprecipitation)
P31946	P33176	YWHAB	KIF5B	psi-mi:MI:0019(coimmunoprecipitation)
P61981	O60333	YWHAG	KIF1B	psi-mi:MI:0019(coimmunoprecipitation)
P61981	O43896	YWHAG	KIF1C	psi-mi:MI:0019(coimmunoprecipitation)
Q04917	O60333	YWHAH	KIF1B	psi-mi:MI:0007(anti tag coimmunoprecipitation)
Q04917	Q02241	YWHAH	KIF23	psi-mi:MI:0007(anti tag coimmunoprecipitation)
Q04917	O60333	YWHAH	KIF1B	psi-mi:MI:0676(tandem affinity purification)
Q04917	O43896	YWHAH	KIF1C	psi-mi:MI:0676(tandem affinity purification)
Q04917	Q02241	YWHAH	KIF23	psi-mi:MI:0676(tandem affinity purification)
Q04917	P33176	YWHAH	KIF5B	psi-mi:MI:0676(tandem affinity purification)
P63104	Q02241	YWHAZ	KIF23	psi-mi:MI:0007(anti tag coimmunoprecipitation)
P63104	Q02241	YWHAZ	KIF23	psi-mi:MI:0096(pull down)
P63104	Q02241	YWHAZ	KIF23	psi-mi:MI:0096(pull down)
P63104	P33176	YWHAZ	KIF5B	psi-mi:MI:0096(pull down)
Q5T4F4	P62491	ZFYVE27	RAB11A	psi-mi:MI:0007(anti tag coimmunoprecipitation)
Q5T4F4	P62491	ZFYVE27	RAB11A	psi-mi:MI:0007(anti tag coimmunoprecipitation)
Q5T4F4	P62491	ZFYVE27	RAB11A	psi-mi:MI:0096(pull down)
Q9Y2X9	O75037	ZNF281	KIF21B	psi-mi:MI:0007(anti tag coimmunoprecipitation)
Q16670	O60333	ZSCAN26	KIF1B	psi-mi:MI:0007(anti tag coimmunoprecipitation)
O43264	Q9HAW0	ZW10	BRF2	psi-mi:MI:0006(anti bait coimmunoprecipitation)
O43264	P35606	ZW10	COPB2	psi-mi:MI:0006(anti bait coimmunoprecipitation)
O43264	P35606	ZW10	COPB2	psi-mi:MI:0006(anti bait coimmunoprecipitation)
O43264	Q9Y2Q3	ZW10	GSTK1	psi-mi:MI:0006(anti bait coimmunoprecipitation)
O43264	P50748	ZW10	KNTC1	psi-mi:MI:0006(anti bait coimmunoprecipitation)
O43264	A2RRP1	ZW10	NBAS	psi-mi:MI:0006(anti bait coimmunoprecipitation)
O43264	A2RRP1	ZW10	NBAS	psi-mi:MI:0006(anti bait coimmunoprecipitation)
O43264	A2RRP1	ZW10	NBAS	psi-mi:MI:0006(anti bait coimmunoprecipitation)
O43264	A2RRP1	ZW10	NBAS	psi-mi:MI:0006(anti bait coimmunoprecipitation)
O43264	Q9Y5J5	ZW10	PHLDA3	psi-mi:MI:0006(anti bait coimmunoprecipitation)
O43264	O75365	ZW10	PTP4A3	psi-mi:MI:0006(anti bait coimmunoprecipitation)
O43264	Q6NUQ1	ZW10	RINT1	psi-mi:MI:0006(anti bait coimmunoprecipitation)
O43264	Q6NUQ1	ZW10	RINT1	psi-mi:MI:0006(anti bait coimmunoprecipitation)
O43264	Q6NUQ1	ZW10	RINT1	psi-mi:MI:0006(anti bait coimmunoprecipitation)
O43264	Q6NUQ1	ZW10	RINT1	psi-mi:MI:0006(anti bait coimmunoprecipitation)
O43264	Q6NUQ1	ZW10	RINT1	psi-mi:MI:0006(anti bait coimmunoprecipitation)
O43264	Q6NUQ1	ZW10	RINT1	psi-mi:MI:0006(anti bait coimmunoprecipitation)
O43264	Q6NUQ1	ZW10	RINT1	psi-mi:MI:0006(anti bait coimmunoprecipitation)
O43264	Q6NUQ1	ZW10	RINT1	psi-mi:MI:0006(anti bait coimmunoprecipitation)
O43264	Q9P2W9	ZW10	STX18	psi-mi:MI:0006(anti bait coimmunoprecipitation)
O43264	Q15714	ZW10	TSC22D1	psi-mi:MI:0006(anti bait coimmunoprecipitation)
O43264	Q9P2Y5	ZW10	UVRAG	psi-mi:MI:0006(anti bait coimmunoprecipitation)
O43264	Q9P2Y5	ZW10	UVRAG	psi-mi:MI:0006(anti bait coimmunoprecipitation)
O43264	Q9P2Y5	ZW10	UVRAG	psi-mi:MI:0006(anti bait coimmunoprecipitation)
O43264	Q9H900	ZW10	ZWILCH	psi-mi:MI:0006(anti bait coimmunoprecipitation)
O43264	Q9H900	ZW10	ZWILCH	psi-mi:MI:0006(anti bait coimmunoprecipitation)
O43264	P50748	ZW10	KNTC1	psi-mi:MI:0007(anti tag coimmunoprecipitation)
O43264	A2RRP1	ZW10	NBAS	psi-mi:MI:0007(anti tag coimmunoprecipitation)
O43264	Q6NUQ1	ZW10	RINT1	psi-mi:MI:0007(anti tag coimmunoprecipitation)
O43264	Q6NUQ1	ZW10	RINT1	psi-mi:MI:0007(anti tag coimmunoprecipitation)
O43264	Q9H900	ZW10	ZWILCH	psi-mi:MI:0007(anti tag coimmunoprecipitation)
O43264	O95229	ZW10	ZWINT	psi-mi:MI:0007(anti tag coimmunoprecipitation)
O43264	O14777	ZW10	NDC80	psi-mi:MI:0096(pull down)
O43264	Q6NUQ1	ZW10	RINT1	psi-mi:MI:0096(pull down)
O43264	Q6NUQ1	ZW10	RINT1	psi-mi:MI:0096(pull down)
O43264	O95229	ZW10	ZWINT	psi-mi:MI:0096(pull down)
O43264	Q9UFG5	ZW10	C19orf25	psi-mi:MI:0676(tandem affinity purification)
O43264	P50748	ZW10	KNTC1	psi-mi:MI:0676(tandem affinity purification)
O43264	Q6NUQ1	ZW10	RINT1	psi-mi:MI:0676(tandem affinity purification)
O43264	Q6NUQ1	ZW10	RINT1	psi-mi:MI:0676(tandem affinity purification)
O43264	Q9H900	ZW10	ZWILCH	psi-mi:MI:0676(tandem affinity purification)
O95229	O43264	ZWINT	ZW10	psi-mi:MI:0096(pull down)

## Sheet: Network1
UniProtA	UniProtB	GeneA	GeneB	Interaction detection method
P15336	P62491	ATF2	RAB11A	psi-mi:MI:0007(anti tag coimmunoprecipitation)
Q6ZNE5	Q14964	ATG14	RAB39A	psi-mi:MI:0007(anti tag coimmunoprecipitation)
Q14457	Q14964	BECN1	RAB39A	psi-mi:MI:0007(anti tag coimmunoprecipitation)
P07384	Q8WTW3	CAPN1	COG1	psi-mi:MI:0007(anti tag coimmunoprecipitation)
P13569	P62491	CFTR	RAB11A	psi-mi:MI:0006(anti bait coimmunoprecipitation)
Q14746	Q9H9E3	COG2	COG4	psi-mi:MI:0019(coimmunoprecipitation)
Q14746	Q9H9E3	COG2	COG4	psi-mi:MI:0019(coimmunoprecipitation)
Q96JB2	Q8WVM8	COG3	SCFD1	psi-mi:MI:0006(anti bait coimmunoprecipitation)
Q96JB2	Q96MW5	COG3	COG8	psi-mi:MI:0006(anti bait coimmunoprecipitation)
Q96JB2	Q96MW5	COG3	COG8	psi-mi:MI:0006(anti bait coimmunoprecipitation)
Q96JB2	P83436	COG3	COG7	psi-mi:MI:0006(anti bait coimmunoprecipitation)
Q96JB2	P83436	COG3	COG7	psi-mi:MI:0006(anti bait coimmunoprecipitation)
Q96JB2	Q9H9E3	COG3	COG4	psi-mi:MI:0006(anti bait coimmunoprecipitation)
Q96JB2	Q9H9E3	COG3	COG4	psi-mi:MI:0006(anti bait coimmunoprecipitation)
Q9H9E3	Q8WVM8	COG4	SCFD1	psi-mi:MI:0006(anti bait coimmunoprecipitation)
Q9H9E3	Q96MW5	COG4	COG8	psi-mi:MI:0006(anti bait coimmunoprecipitation)
Q9H9E3	Q96MW5	COG4	COG8	psi-mi:MI:0006(anti bait coimmunoprecipitation)
Q9H9E3	P83436	COG4	COG7	psi-mi:MI:0006(anti bait coimmunoprecipitation)
Q9H9E3	P83436	COG4	COG7	psi-mi:MI:0006(anti bait coimmunoprecipitation)
Q9H9E3	Q96JB2	COG4	COG3	psi-mi:MI:0006(anti bait coimmunoprecipitation)
Q9H9E3	Q96JB2	COG4	COG3	psi-mi:MI:0006(anti bait coimmunoprecipitation)
Q9H9E3	Q8WVM8	COG4	SCFD1	psi-mi:MI:0007(anti tag coimmunoprecipitation)
Q9H9E3	Q8WVM8	COG4	SCFD1	psi-mi:MI:0007(anti tag coimmunoprecipitation)
Q9H9E3	P83436	COG4	COG7	psi-mi:MI:0019(coimmunoprecipitation)
Q9H9E3	P83436	COG4	COG7	psi-mi:MI:0019(coimmunoprecipitation)
Q9H9E3	Q9UP83	COG4	COG5	psi-mi:MI:0019(coimmunoprecipitation)
Q9H9E3	Q9UP83	COG4	COG5	psi-mi:MI:0019(coimmunoprecipitation)
Q9H9E3	Q14746	COG4	COG2	psi-mi:MI:0019(coimmunoprecipitation)
Q9H9E3	Q14746	COG4	COG2	psi-mi:MI:0019(coimmunoprecipitation)
Q9H9E3	Q8WTW3	COG4	COG1	psi-mi:MI:0019(coimmunoprecipitation)
Q9H9E3	Q8WTW3	COG4	COG1	psi-mi:MI:0019(coimmunoprecipitation)
Q9H9E3	Q8WTW3	COG4	COG1	psi-mi:MI:0019(coimmunoprecipitation)
Q9H9E3	Q8WTW3	COG4	COG1	psi-mi:MI:0019(coimmunoprecipitation)
Q9H9E3	Q13190	COG4	STX5	psi-mi:MI:0096(pull down)
Q9H9E3	Q8WVM8	COG4	SCFD1	psi-mi:MI:0096(pull down)
Q9H9E3	Q8WVM8	COG4	SCFD1	psi-mi:MI:0096(pull down)
Q9UP83	P83436	COG5	COG7	psi-mi:MI:0019(coimmunoprecipitation)
Q9UP83	P83436	COG5	COG7	psi-mi:MI:0019(coimmunoprecipitation)
Q9UP83	Q9H9E3	COG5	COG4	psi-mi:MI:0019(coimmunoprecipitation)
Q9UP83	Q9H9E3	COG5	COG4	psi-mi:MI:0019(coimmunoprecipitation)
Q9Y2V7	Q9H9E3	COG6	COG4	psi-mi:MI:0006(anti bait coimmunoprecipitation)
P83436	Q8WVM8	COG7	SCFD1	psi-mi:MI:0006(anti bait coimmunoprecipitation)
P83436	Q96MW5	COG7	COG8	psi-mi:MI:0006(anti bait coimmunoprecipitation)
P83436	Q96MW5	COG7	COG8	psi-mi:MI:0006(anti bait coimmunoprecipitation)
P83436	Q9H9E3	COG7	COG4	psi-mi:MI:0006(anti bait coimmunoprecipitation)
P83436	Q9H9E3	COG7	COG4	psi-mi:MI:0006(anti bait coimmunoprecipitation)
P83436	Q96JB2	COG7	COG3	psi-mi:MI:0006(anti bait coimmunoprecipitation)
P83436	Q96JB2	COG7	COG3	psi-mi:MI:0006(anti bait coimmunoprecipitation)
P83436	Q9UP83	COG7	COG5	psi-mi:MI:0019(coimmunoprecipitation)
P83436	Q9UP83	COG7	COG5	psi-mi:MI:0019(coimmunoprecipitation)
P83436	Q9H9E3	COG7	COG4	psi-mi:MI:0019(coimmunoprecipitation)
P83436	Q9H9E3	COG7	COG4	psi-mi:MI:0019(coimmunoprecipitation)
Q92731	Q9Y2V7	ESR2	COG6	psi-mi:MI:0676(tandem affinity purification)
Q99853	Q9UP83	FOXB1	COG5	psi-mi:MI:0676(tandem affinity purification)
Q12952	Q6NUQ1	FOXL1	RINT1	psi-mi:MI:0676(tandem affinity purification)
Q12952	Q9UP83	FOXL1	COG5	psi-mi:MI:0676(tandem affinity purification)
Q9H0R8	Q14964	GABARAPL1	RAB39A	psi-mi:MI:0007(anti tag coimmunoprecipitation)
Q9H0R8	Q9H082	GABARAPL1	RAB33B	psi-mi:MI:0007(anti tag coimmunoprecipitation)
Q8IWJ2	P20340	GCC2	RAB6A	psi-mi:MI:0004(affinity chromatography technology)
Q8IWJ2	P20340	GCC2	RAB6A	psi-mi:MI:0004(affinity chromatography technology)
Q8IWJ2	P20340	GCC2	RAB6A	psi-mi:MI:0114(x-ray crystallography)
Q13547	Q9H9E3	HDAC1	COG4	psi-mi:MI:0007(anti tag coimmunoprecipitation)
P42858	P62491	HTT	RAB11A	psi-mi:MI:0006(anti bait coimmunoprecipitation)
Q13352	Q8WTW3	ITGB3BP	COG1	psi-mi:MI:0007(anti tag coimmunoprecipitation)
P05412	Q9H082	JUN	RAB33B	psi-mi:MI:0006(anti bait coimmunoprecipitation)
P05412	Q9H082	JUN	RAB33B	psi-mi:MI:0006(anti bait coimmunoprecipitation)
P05412	Q9Y2V7	JUN	COG6	psi-mi:MI:0006(anti bait coimmunoprecipitation)
Q86WU2	O43264	LDHD	ZW10	psi-mi:MI:0007(anti tag coimmunoprecipitation)
Q5S007	O14966	LRRK2	RAB29	psi-mi:MI:0007(anti tag coimmunoprecipitation)
Q5S007	O14966	LRRK2	RAB29	psi-mi:MI:0007(anti tag coimmunoprecipitation)
P10636	O43264	MAPT	ZW10	psi-mi:MI:0006(anti bait coimmunoprecipitation)
P46013	O43264	MKI67	ZW10	psi-mi:MI:0007(anti tag coimmunoprecipitation)
Q9BV36	P51159	MLPH	RAB27A	psi-mi:MI:0007(anti tag coimmunoprecipitation)
Q9BV36	P51159	MLPH	RAB27A	psi-mi:MI:0007(anti tag coimmunoprecipitation)
Q9BV36	P51159	MLPH	RAB27A	psi-mi:MI:0096(pull down)
A2RRP1	O43264	NBAS	ZW10	psi-mi:MI:0006(anti bait coimmunoprecipitation)
A2RRP1	O43264	NBAS	ZW10	psi-mi:MI:0006(anti bait coimmunoprecipitation)
A2RRP1	Q6NUQ1	NBAS	RINT1	psi-mi:MI:0006(anti bait coimmunoprecipitation)
A2RRP1	Q6NUQ1	NBAS	RINT1	psi-mi:MI:0006(anti bait coimmunoprecipitation)
A2RRP1	O43264	NBAS	ZW10	psi-mi:MI:0007(anti tag coimmunoprecipitation)
A2RRP1	O43264	NBAS	ZW10	psi-mi:MI:0007(anti tag coimmunoprecipitation)
A2RRP1	O43264	NBAS	ZW10	psi-mi:MI:0007(anti tag coimmunoprecipitation)
A2RRP1	Q6NUQ1	NBAS	RINT1	psi-mi:MI:0007(anti tag coimmunoprecipitation)
A2RRP1	Q6NUQ1	NBAS	RINT1	psi-mi:MI:0007(anti tag coimmunoprecipitation)
A2RRP1	Q6NUQ1	NBAS	RINT1	psi-mi:MI:0007(anti tag coimmunoprecipitation)
O14777	O43264	NDC80	ZW10	psi-mi:MI:0006(anti bait coimmunoprecipitation)
O14777	O43264	NDC80	ZW10	psi-mi:MI:0096(pull down)
Q01968	P20340	OCRL	RAB6A	psi-mi:MI:0007(anti tag coimmunoprecipitation)
Q01968	P62491	OCRL	RAB11A	psi-mi:MI:0007(anti tag coimmunoprecipitation)
Q01968	P20340	OCRL	RAB6A	psi-mi:MI:0096(pull down)
Q01968	P20340	OCRL	RAB6A	psi-mi:MI:0096(pull down)
Q01968	P20340	OCRL	RAB6A	psi-mi:MI:0096(pull down)
Q01968	P20340	OCRL	RAB6A	psi-mi:MI:0096(pull down)
Q01968	P20340	OCRL	RAB6A	psi-mi:MI:0096(pull down)
Q01968	P20340	OCRL	RAB6A	psi-mi:MI:0676(tandem affinity purification)
Q8NEB9	Q14964	PIK3C3	RAB39A	psi-mi:MI:0007(anti tag coimmunoprecipitation)
P30153	P62491	PPP2R1A	RAB11A	psi-mi:MI:0007(anti tag coimmunoprecipitation)
P30154	P62491	PPP2R1B	RAB11A	psi-mi:MI:0007(anti tag coimmunoprecipitation)
P61026	Q14964	RAB10	RAB39A	psi-mi:MI:0007(anti tag coimmunoprecipitation)
P62491	P46937	RAB11A	YAP1	psi-mi:MI:0006(anti bait coimmunoprecipitation)
P62491	P46937	RAB11A	YAP1	psi-mi:MI:0006(anti bait coimmunoprecipitation)
P62491	P40337	RAB11A	VHL	psi-mi:MI:0006(anti bait coimmunoprecipitation)
P62491	Q9Y4K3	RAB11A	TRAF6	psi-mi:MI:0006(anti bait coimmunoprecipitation)
P62491	P23368	RAB11A	ME2	psi-mi:MI:0006(anti bait coimmunoprecipitation)
P62491	Q14164	RAB11A	IKBKE	psi-mi:MI:0006(anti bait coimmunoprecipitation)
P62491	Q9UET6	RAB11A	FTSJ1	psi-mi:MI:0006(anti bait coimmunoprecipitation)
P62491	O60447	RAB11A	EVI5	psi-mi:MI:0006(anti bait coimmunoprecipitation)
P62491	P00533	RAB11A	EGFR	psi-mi:MI:0006(anti bait coimmunoprecipitation)
P62491	Q9HAV4	RAB11A	XPO5	psi-mi:MI:0007(anti tag coimmunoprecipitation)
P62491	Q5JSH3	RAB11A	WDR44	psi-mi:MI:0007(anti tag coimmunoprecipitation)
P62491	Q9C0C2	RAB11A	TNKS1BP1	psi-mi:MI:0007(anti tag coimmunoprecipitation)
P62491	Q9BTV4	RAB11A	TMEM43	psi-mi:MI:0007(anti tag coimmunoprecipitation)
P62491	P35610	RAB11A	SOAT1	psi-mi:MI:0007(anti tag coimmunoprecipitation)
P62491	Q9BXF6	RAB11A	RAB11FIP5	psi-mi:MI:0007(anti tag coimmunoprecipitation)
P62491	Q7L804	RAB11A	RAB11FIP2	psi-mi:MI:0007(anti tag coimmunoprecipitation)
P62491	Q7L804	RAB11A	RAB11FIP2	psi-mi:MI:0007(anti tag coimmunoprecipitation)
P62491	Q6WKZ4	RAB11A	RAB11FIP1	psi-mi:MI:0007(anti tag coimmunoprecipitation)
P62491	Q99623	RAB11A	PHB2	psi-mi:MI:0007(anti tag coimmunoprecipitation)
P62491	P35232	RAB11A	PHB	psi-mi:MI:0007(anti tag coimmunoprecipitation)
P62491	Q9ULH0	RAB11A	KIDINS220	psi-mi:MI:0007(anti tag coimmunoprecipitation)
P62491	Q9BX10	RAB11A	GTPBP2	psi-mi:MI:0007(anti tag coimmunoprecipitation)
P62491	Q8NBJ4	RAB11A	GOLM1	psi-mi:MI:0007(anti tag coimmunoprecipitation)
P62491	Q96CN4	RAB11A	EVI5L	psi-mi:MI:0007(anti tag coimmunoprecipitation)
P62491	O60447	RAB11A	EVI5	psi-mi:MI:0007(anti tag coimmunoprecipitation)
P62491	Q9H4M9	RAB11A	EHD1	psi-mi:MI:0007(anti tag coimmunoprecipitation)
P62491	P61981	RAB11A	YWHAG	psi-mi:MI:0096(pull down)
P62491	Q86YS3	RAB11A	RAB11FIP4	psi-mi:MI:0096(pull down)
P62491	O75154	RAB11A	RAB11FIP3	psi-mi:MI:0096(pull down)
P62491	O75154	RAB11A	RAB11FIP3	psi-mi:MI:0096(pull down)
P62491	P28070	RAB11A	PSMB4	psi-mi:MI:0096(pull down)
P62491	Q9UBF8	RAB11A	PI4KB	psi-mi:MI:0096(pull down)
P62491	O43813	RAB11A	LANCL1	psi-mi:MI:0096(pull down)
P62491	P0DMV8	RAB11A	HSPA1A	psi-mi:MI:0096(pull down)
P62491	P42357	RAB11A	HAL	psi-mi:MI:0096(pull down)
P62491	Q9HAV7	RAB11A	GRPEL1	psi-mi:MI:0096(pull down)
P62491	O60447	RAB11A	EVI5	psi-mi:MI:0096(pull down)
P62491	O60447	RAB11A	EVI5	psi-mi:MI:0096(pull down)
P62491	P84085	RAB11A	ARF5	psi-mi:MI:0096(pull down)
P62491	Q9UBF8	RAB11A	PI4KB	psi-mi:MI:0107(surface plasmon resonance)
P62491	O60447	RAB11A	EVI5	psi-mi:MI:0107(surface plasmon resonance)
P62491	Q7L804	RAB11A	RAB11FIP2	psi-mi:MI:0114(x-ray crystallography)
P62491	Q9UBF8	RAB11A	PI4KB	psi-mi:MI:0114(x-ray crystallography)
Q6WKZ4	P62491	RAB11FIP1	RAB11A	psi-mi:MI:0006(anti bait coimmunoprecipitation)
Q7L804	P62491	RAB11FIP2	RAB11A	psi-mi:MI:0096(pull down)
O75154	P62491	RAB11FIP3	RAB11A	psi-mi:MI:0096(pull down)
O75154	P62491	RAB11FIP3	RAB11A	psi-mi:MI:0096(pull down)
O75154	P62491	RAB11FIP3	RAB11A	psi-mi:MI:0096(pull down)
O75154	P62491	RAB11FIP3	RAB11A	psi-mi:MI:0096(pull down)
O75154	P62491	RAB11FIP3	RAB11A	psi-mi:MI:0096(pull down)
O75154	P62491	RAB11FIP3	RAB11A	psi-mi:MI:0096(pull down)
O75154	P62491	RAB11FIP3	RAB11A	psi-mi:MI:0114(x-ray crystallography)
O75154	P62491	RAB11FIP3	RAB11A	psi-mi:MI:0114(x-ray crystallography)
O75154	P62491	RAB11FIP3	RAB11A	psi-mi:MI:0114(x-ray crystallography)
Q9BXF6	P62491	RAB11FIP5	RAB11A	psi-mi:MI:0096(pull down)
Q6IQ22	Q14964	RAB12	RAB39A	psi-mi:MI:0007(anti tag coimmunoprecipitation)
O14966	Q5S007	RAB29	LRRK2	psi-mi:MI:0007(anti tag coimmunoprecipitation)
O14966	Q5S007	RAB29	LRRK2	psi-mi:MI:0007(anti tag coimmunoprecipitation)
O14966	P11142	RAB29	HSPA8	psi-mi:MI:0007(anti tag coimmunoprecipitation)
O14966	O14976	RAB29	GAK	psi-mi:MI:0007(anti tag coimmunoprecipitation)
Q14964	Q14457	RAB39A	BECN1	psi-mi:MI:0006(anti bait coimmunoprecipitation)
Q96QF0	P62491	RAB3IP	RAB11A	psi-mi:MI:0096(pull down)
Q96QF0	P62491	RAB3IP	RAB11A	psi-mi:MI:0096(pull down)
Q96QF0	P62491	RAB3IP	RAB11A	psi-mi:MI:0096(pull down)
Q96QF0	P62491	RAB3IP	RAB11A	psi-mi:MI:0096(pull down)
Q96QF0	P62491	RAB3IP	RAB11A	psi-mi:MI:0096(pull down)
Q96QF0	P62491	RAB3IP	RAB11A	psi-mi:MI:0096(pull down)
Q96QF0	P62491	RAB3IP	RAB11A	psi-mi:MI:0114(x-ray crystallography)
P20340	P40337	RAB6A	VHL	psi-mi:MI:0006(anti bait coimmunoprecipitation)
P20340	P30480	RAB6A	HLA-B	psi-mi:MI:0006(anti bait coimmunoprecipitation)
P20340	Q01968	RAB6A	OCRL	psi-mi:MI:0096(pull down)
P20340	Q01968	RAB6A	OCRL	psi-mi:MI:0096(pull down)
P20340	Q14203	RAB6A	DCTN1	psi-mi:MI:0096(pull down)
P20340	Q01968	RAB6A	OCRL	psi-mi:MI:0411(enzyme linked immunosorbent assay)
P61006	P20340	RAB8A	RAB6A	psi-mi:MI:0007(anti tag coimmunoprecipitation)
P61006	Q14964	RAB8A	RAB39A	psi-mi:MI:0007(anti tag coimmunoprecipitation)
P61006	Q14964	RAB8A	RAB39A	psi-mi:MI:0007(anti tag coimmunoprecipitation)
Q6NUQ1	O43264	RINT1	ZW10	psi-mi:MI:0006(anti bait coimmunoprecipitation)
Q6NUQ1	O43264	RINT1	ZW10	psi-mi:MI:0006(anti bait coimmunoprecipitation)
Q6NUQ1	O43264	RINT1	ZW10	psi-mi:MI:0006(anti bait coimmunoprecipitation)
Q6NUQ1	O43264	RINT1	ZW10	psi-mi:MI:0006(anti bait coimmunoprecipitation)
Q6NUQ1	O43264	RINT1	ZW10	psi-mi:MI:0006(anti bait coimmunoprecipitation)
Q6NUQ1	O43264	RINT1	ZW10	psi-mi:MI:0006(anti bait coimmunoprecipitation)
Q6NUQ1	O43264	RINT1	ZW10	psi-mi:MI:0006(anti bait coimmunoprecipitation)
Q6NUQ1	O43264	RINT1	ZW10	psi-mi:MI:0006(anti bait coimmunoprecipitation)
Q6NUQ1	O43264	RINT1	ZW10	psi-mi:MI:0006(anti bait coimmunoprecipitation)
Q6NUQ1	O43264	RINT1	ZW10	psi-mi:MI:0006(anti bait coimmunoprecipitation)
Q6NUQ1	O43264	RINT1	ZW10	psi-mi:MI:0006(anti bait coimmunoprecipitation)
Q6NUQ1	O43264	RINT1	ZW10	psi-mi:MI:0006(anti bait coimmunoprecipitation)
Q6NUQ1	Q9P2Y5	RINT1	UVRAG	psi-mi:MI:0006(anti bait coimmunoprecipitation)
Q6NUQ1	Q9P2Y5	RINT1	UVRAG	psi-mi:MI:0006(anti bait coimmunoprecipitation)
Q6NUQ1	Q9P2Y5	RINT1	UVRAG	psi-mi:MI:0006(anti bait coimmunoprecipitation)
Q6NUQ1	Q9P2W9	RINT1	STX18	psi-mi:MI:0006(anti bait coimmunoprecipitation)
Q6NUQ1	A2RRP1	RINT1	NBAS	psi-mi:MI:0006(anti bait coimmunoprecipitation)
Q6NUQ1	A2RRP1	RINT1	NBAS	psi-mi:MI:0006(anti bait coimmunoprecipitation)
Q6NUQ1	A2RRP1	RINT1	NBAS	psi-mi:MI:0006(anti bait coimmunoprecipitation)
Q6NUQ1	A2RRP1	RINT1	NBAS	psi-mi:MI:0006(anti bait coimmunoprecipitation)
Q6NUQ1	A2RRP1	RINT1	NBAS	psi-mi:MI:0006(anti bait coimmunoprecipitation)
Q6NUQ1	A2RRP1	RINT1	NBAS	psi-mi:MI:0006(anti bait coimmunoprecipitation)
Q6NUQ1	P35606	RINT1	COPB2	psi-mi:MI:0006(anti bait coimmunoprecipitation)
Q6NUQ1	P35606	RINT1	COPB2	psi-mi:MI:0006(anti bait coimmunoprecipitation)
Q6NUQ1	P35606	RINT1	COPB2	psi-mi:MI:0006(anti bait coimmunoprecipitation)
Q6NUQ1	O43264	RINT1	ZW10	psi-mi:MI:0007(anti tag coimmunoprecipitation)
Q6NUQ1	O43264	RINT1	ZW10	psi-mi:MI:0007(anti tag coimmunoprecipitation)
Q6NUQ1	A2RRP1	RINT1	NBAS	psi-mi:MI:0007(anti tag coimmunoprecipitation)
Q8WVM8	P83436	SCFD1	COG7	psi-mi:MI:0007(anti tag coimmunoprecipitation)
Q8WVM8	Q9H9E3	SCFD1	COG4	psi-mi:MI:0007(anti tag coimmunoprecipitation)
Q8WVM8	Q9H9E3	SCFD1	COG4	psi-mi:MI:0007(anti tag coimmunoprecipitation)
Q8WVM8	Q96JB2	SCFD1	COG3	psi-mi:MI:0007(anti tag coimmunoprecipitation)
Q8WVM8	Q9H9E3	SCFD1	COG4	psi-mi:MI:0096(pull down)
Q8WVM8	Q9H9E3	SCFD1	COG4	psi-mi:MI:0096(pull down)
Q96NL6	Q6NUQ1	SCLT1	RINT1	psi-mi:MI:0007(anti tag coimmunoprecipitation)
O00400	O43264	SLC33A1	ZW10	psi-mi:MI:0007(anti tag coimmunoprecipitation)
P27105	O43264	STOM	ZW10	psi-mi:MI:0676(tandem affinity purification)
Q9P2W9	O43264	STX18	ZW10	psi-mi:MI:0006(anti bait coimmunoprecipitation)
Q9P2W9	O43264	STX18	ZW10	psi-mi:MI:0006(anti bait coimmunoprecipitation)
Q9P2W9	Q6NUQ1	STX18	RINT1	psi-mi:MI:0006(anti bait coimmunoprecipitation)
Q9P2W9	Q6NUQ1	STX18	RINT1	psi-mi:MI:0006(anti bait coimmunoprecipitation)
Q13190	Q9H9E3	STX5	COG4	psi-mi:MI:0096(pull down)
Q9NZ43	O43264	USE1	ZW10	psi-mi:MI:0006(anti bait coimmunoprecipitation)
Q9NZ43	O43264	USE1	ZW10	psi-mi:MI:0006(anti bait coimmunoprecipitation)
Q9NZ43	O43264	USE1	ZW10	psi-mi:MI:0006(anti bait coimmunoprecipitation)
Q9NZ43	Q6NUQ1	USE1	RINT1	psi-mi:MI:0006(anti bait coimmunoprecipitation)
Q9NZ43	Q6NUQ1	USE1	RINT1	psi-mi:MI:0006(anti bait coimmunoprecipitation)
Q9NZ43	Q6NUQ1	USE1	RINT1	psi-mi:MI:0006(anti bait coimmunoprecipitation)
Q9NZ43	O43264	USE1	ZW10	psi-mi:MI:0007(anti tag coimmunoprecipitation)
Q9NZ43	Q6NUQ1	USE1	RINT1	psi-mi:MI:0007(anti tag coimmunoprecipitation)
Q9NZ43	O43264	USE1	ZW10	psi-mi:MI:0096(pull down)
Q9NZ43	Q6NUQ1	USE1	RINT1	psi-mi:MI:0096(pull down)
Q9NZ43	Q6NUQ1	USE1	RINT1	psi-mi:MI:0096(pull down)
Q9P2Y5	O43264	UVRAG	ZW10	psi-mi:MI:0006(anti bait coimmunoprecipitation)
Q9P2Y5	O43264	UVRAG	ZW10	psi-mi:MI:0006(anti bait coimmunoprecipitation)
Q9P2Y5	O43264	UVRAG	ZW10	psi-mi:MI:0006(anti bait coimmunoprecipitation)
Q9P2Y5	O43264	UVRAG	ZW10	psi-mi:MI:0006(anti bait coimmunoprecipitation)
Q9P2Y5	O43264	UVRAG	ZW10	psi-mi:MI:0006(anti bait coimmunoprecipitation)
Q9P2Y5	O43264	UVRAG	ZW10	psi-mi:MI:0006(anti bait coimmunoprecipitation)
Q9P2Y5	Q6NUQ1	UVRAG	RINT1	psi-mi:MI:0006(anti bait coimmunoprecipitation)
Q9P2Y5	Q6NUQ1	UVRAG	RINT1	psi-mi:MI:0006(anti bait coimmunoprecipitation)
Q9P2Y5	Q6NUQ1	UVRAG	RINT1	psi-mi:MI:0006(anti bait coimmunoprecipitation)
Q9P2Y5	Q6NUQ1	UVRAG	RINT1	psi-mi:MI:0006(anti bait coimmunoprecipitation)
Q9P2Y5	Q6NUQ1	UVRAG	RINT1	psi-mi:MI:0006(anti bait coimmunoprecipitation)
Q9P2Y5	Q6NUQ1	UVRAG	RINT1	psi-mi:MI:0006(anti bait coimmunoprecipitation)
Q9P2Y5	Q6NUQ1	UVRAG	RINT1	psi-mi:MI:0006(anti bait coimmunoprecipitation)
Q9P2Y5	O43264	UVRAG	ZW10	psi-mi:MI:0007(anti tag coimmunoprecipitation)
Q9P2Y5	O43264	UVRAG	ZW10	psi-mi:MI:0007(anti tag coimmunoprecipitation)
Q9P2Y5	O43264	UVRAG	ZW10	psi-mi:MI:0007(anti tag coimmunoprecipitation)
Q9P2Y5	Q6NUQ1	UVRAG	RINT1	psi-mi:MI:0007(anti tag coimmunoprecipitation)
Q9P2Y5	Q6NUQ1	UVRAG	RINT1	psi-mi:MI:0007(anti tag coimmunoprecipitation)
Q9P2Y5	Q6NUQ1	UVRAG	RINT1	psi-mi:MI:0007(anti tag coimmunoprecipitation)
Q9P2Y5	Q6NUQ1	UVRAG	RINT1	psi-mi:MI:0007(anti tag coimmunoprecipitation)
Q9P2Y5	Q6NUQ1	UVRAG	RINT1	psi-mi:MI:0007(anti tag coimmunoprecipitation)
Q9P2Y5	Q6NUQ1	UVRAG	RINT1	psi-mi:MI:0007(anti tag coimmunoprecipitation)
Q9P2Y5	Q14964	UVRAG	RAB39A	psi-mi:MI:0007(anti tag coimmunoprecipitation)
Q9P2Y5	Q6NUQ1	UVRAG	RINT1	psi-mi:MI:0096(pull down)
O43542	O43264	XRCC3	ZW10	psi-mi:MI:0007(anti tag coimmunoprecipitation)
Q5T4F4	P62491	ZFYVE27	RAB11A	psi-mi:MI:0007(anti tag coimmunoprecipitation)
Q5T4F4	P62491	ZFYVE27	RAB11A	psi-mi:MI:0007(anti tag coimmunoprecipitation)
Q5T4F4	P62491	ZFYVE27	RAB11A	psi-mi:MI:0096(pull down)
O43264	Q9H900	ZW10	ZWILCH	psi-mi:MI:0006(anti bait coimmunoprecipitation)
O43264	Q9H900	ZW10	ZWILCH	psi-mi:MI:0006(anti bait coimmunoprecipitation)
O43264	Q9P2Y5	ZW10	UVRAG	psi-mi:MI:0006(anti bait coimmunoprecipitation)
O43264	Q9P2Y5	ZW10	UVRAG	psi-mi:MI:0006(anti bait coimmunoprecipitation)
O43264	Q9P2Y5	ZW10	UVRAG	psi-mi:MI:0006(anti bait coimmunoprecipitation)
O43264	Q15714	ZW10	TSC22D1	psi-mi:MI:0006(anti bait coimmunoprecipitation)
O43264	Q9P2W9	ZW10	STX18	psi-mi:MI:0006(anti bait coimmunoprecipitation)
O43264	Q6NUQ1	ZW10	RINT1	psi-mi:MI:0006(anti bait coimmunoprecipitation)
O43264	Q6NUQ1	ZW10	RINT1	psi-mi:MI:0006(anti bait coimmunoprecipitation)
O43264	Q6NUQ1	ZW10	RINT1	psi-mi:MI:0006(anti bait coimmunoprecipitation)
O43264	Q6NUQ1	ZW10	RINT1	psi-mi:MI:0006(anti bait coimmunoprecipitation)
O43264	Q6NUQ1	ZW10	RINT1	psi-mi:MI:0006(anti bait coimmunoprecipitation)
O43264	Q6NUQ1	ZW10	RINT1	psi-mi:MI:0006(anti bait coimmunoprecipitation)
O43264	Q6NUQ1	ZW10	RINT1	psi-mi:MI:0006(anti bait coimmunoprecipitation)
O43264	Q6NUQ1	ZW10	RINT1	psi-mi:MI:0006(anti bait coimmunoprecipitation)
O43264	O75365	ZW10	PTP4A3	psi-mi:MI:0006(anti bait coimmunoprecipitation)
O43264	Q9Y5J5	ZW10	PHLDA3	psi-mi:MI:0006(anti bait coimmunoprecipitation)
O43264	A2RRP1	ZW10	NBAS	psi-mi:MI:0006(anti bait coimmunoprecipitation)
O43264	A2RRP1	ZW10	NBAS	psi-mi:MI:0006(anti bait coimmunoprecipitation)
O43264	A2RRP1	ZW10	NBAS	psi-mi:MI:0006(anti bait coimmunoprecipitation)
O43264	A2RRP1	ZW10	NBAS	psi-mi:MI:0006(anti bait coimmunoprecipitation)
O43264	P50748	ZW10	KNTC1	psi-mi:MI:0006(anti bait coimmunoprecipitation)
O43264	Q9Y2Q3	ZW10	GSTK1	psi-mi:MI:0006(anti bait coimmunoprecipitation)
O43264	P35606	ZW10	COPB2	psi-mi:MI:0006(anti bait coimmunoprecipitation)
O43264	P35606	ZW10	COPB2	psi-mi:MI:0006(anti bait coimmunoprecipitation)
O43264	Q9HAW0	ZW10	BRF2	psi-mi:MI:0006(anti bait coimmunoprecipitation)
O43264	O95229	ZW10	ZWINT	psi-mi:MI:0007(anti tag coimmunoprecipitation)
O43264	Q9H900	ZW10	ZWILCH	psi-mi:MI:0007(anti tag coimmunoprecipitation)
O43264	Q6NUQ1	ZW10	RINT1	psi-mi:MI:0007(anti tag coimmunoprecipitation)
O43264	Q6NUQ1	ZW10	RINT1	psi-mi:MI:0007(anti tag coimmunoprecipitation)
O43264	A2RRP1	ZW10	NBAS	psi-mi:MI:0007(anti tag coimmunoprecipitation)
O43264	P50748	ZW10	KNTC1	psi-mi:MI:0007(anti tag coimmunoprecipitation)
O43264	O95229	ZW10	ZWINT	psi-mi:MI:0096(pull down)
O43264	Q6NUQ1	ZW10	RINT1	psi-mi:MI:0096(pull down)
O43264	Q6NUQ1	ZW10	RINT1	psi-mi:MI:0096(pull down)
O43264	O14777	ZW10	NDC80	psi-mi:MI:0096(pull down)
O43264	Q9H900	ZW10	ZWILCH	psi-mi:MI:0676(tandem affinity purification)
O43264	Q6NUQ1	ZW10	RINT1	psi-mi:MI:0676(tandem affinity purification)
O43264	Q6NUQ1	ZW10	RINT1	psi-mi:MI:0676(tandem affinity purification)
O43264	P50748	ZW10	KNTC1	psi-mi:MI:0676(tandem affinity purification)
O43264	Q9UFG5	ZW10	C19orf25	psi-mi:MI:0676(tandem affinity purification)
O95229	O43264	ZWINT	ZW10	psi-mi:MI:0096(pull down)

## Sheet: Network2
UniProtA	UniProtB	GeneA	GeneB	Interaction detection method
Q96NW4	Q12840	ANKRD27	KIF5A	psi-mi:MI:0006(anti bait coimmunoprecipitation)
Q96NW4	Q12840	ANKRD27	KIF5A	psi-mi:MI:0007(anti tag coimmunoprecipitation)
O00203	Q9Y496	AP3B1	KIF3A	psi-mi:MI:0096(pull down)
O00203	Q9Y496	AP3B1	KIF3A	psi-mi:MI:0096(pull down)
P49407	Q99661	ARRB1	KIF2C	psi-mi:MI:0007(anti tag coimmunoprecipitation)
P49407	Q9Y496	ARRB1	KIF3A	psi-mi:MI:0007(anti tag coimmunoprecipitation)
P07384	Q8WTW3	CAPN1	COG1	psi-mi:MI:0007(anti tag coimmunoprecipitation)
Q49A88	Q15058	CCDC14	KIF14	psi-mi:MI:0007(anti tag coimmunoprecipitation)
Q99459	Q99661	CDC5L	KIF2C	psi-mi:MI:0006(anti bait coimmunoprecipitation)
Q96L14	Q9BVG8	CEP170P1	KIFC3	psi-mi:MI:0676(tandem affinity purification)
O15078	Q2M1P5	CEP290	KIF7	psi-mi:MI:0007(anti tag coimmunoprecipitation)
Q14746	Q9H9E3	COG2	COG4	psi-mi:MI:0019(coimmunoprecipitation)
Q14746	Q9H9E3	COG2	COG4	psi-mi:MI:0019(coimmunoprecipitation)
Q96JB2	Q9H9E3	COG3	COG4	psi-mi:MI:0006(anti bait coimmunoprecipitation)
Q96JB2	Q9H9E3	COG3	COG4	psi-mi:MI:0006(anti bait coimmunoprecipitation)
Q96JB2	P83436	COG3	COG7	psi-mi:MI:0006(anti bait coimmunoprecipitation)
Q96JB2	P83436	COG3	COG7	psi-mi:MI:0006(anti bait coimmunoprecipitation)
Q96JB2	Q96MW5	COG3	COG8	psi-mi:MI:0006(anti bait coimmunoprecipitation)
Q96JB2	Q96MW5	COG3	COG8	psi-mi:MI:0006(anti bait coimmunoprecipitation)
Q96JB2	Q8WVM8	COG3	SCFD1	psi-mi:MI:0006(anti bait coimmunoprecipitation)
Q9H9E3	Q96JB2	COG4	COG3	psi-mi:MI:0006(anti bait coimmunoprecipitation)
Q9H9E3	Q96JB2	COG4	COG3	psi-mi:MI:0006(anti bait coimmunoprecipitation)
Q9H9E3	P83436	COG4	COG7	psi-mi:MI:0006(anti bait coimmunoprecipitation)
Q9H9E3	P83436	COG4	COG7	psi-mi:MI:0006(anti bait coimmunoprecipitation)
Q9H9E3	Q96MW5	COG4	COG8	psi-mi:MI:0006(anti bait coimmunoprecipitation)
Q9H9E3	Q96MW5	COG4	COG8	psi-mi:MI:0006(anti bait coimmunoprecipitation)
Q9H9E3	Q8WVM8	COG4	SCFD1	psi-mi:MI:0006(anti bait coimmunoprecipitation)
Q9H9E3	Q8WVM8	COG4	SCFD1	psi-mi:MI:0007(anti tag coimmunoprecipitation)
Q9H9E3	Q8WVM8	COG4	SCFD1	psi-mi:MI:0007(anti tag coimmunoprecipitation)
Q9H9E3	Q8WTW3	COG4	COG1	psi-mi:MI:0019(coimmunoprecipitation)
Q9H9E3	Q8WTW3	COG4	COG1	psi-mi:MI:0019(coimmunoprecipitation)
Q9H9E3	Q8WTW3	COG4	COG1	psi-mi:MI:0019(coimmunoprecipitation)
Q9H9E3	Q8WTW3	COG4	COG1	psi-mi:MI:0019(coimmunoprecipitation)
Q9H9E3	Q14746	COG4	COG2	psi-mi:MI:0019(coimmunoprecipitation)
Q9H9E3	Q14746	COG4	COG2	psi-mi:MI:0019(coimmunoprecipitation)
Q9H9E3	Q9UP83	COG4	COG5	psi-mi:MI:0019(coimmunoprecipitation)
Q9H9E3	Q9UP83	COG4	COG5	psi-mi:MI:0019(coimmunoprecipitation)
Q9H9E3	P83436	COG4	COG7	psi-mi:MI:0019(coimmunoprecipitation)
Q9H9E3	P83436	COG4	COG7	psi-mi:MI:0019(coimmunoprecipitation)
Q9H9E3	Q8WVM8	COG4	SCFD1	psi-mi:MI:0096(pull down)
Q9H9E3	Q8WVM8	COG4	SCFD1	psi-mi:MI:0096(pull down)
Q9H9E3	Q13190	COG4	STX5	psi-mi:MI:0096(pull down)
Q9UP83	Q9H9E3	COG5	COG4	psi-mi:MI:0019(coimmunoprecipitation)
Q9UP83	Q9H9E3	COG5	COG4	psi-mi:MI:0019(coimmunoprecipitation)
Q9UP83	P83436	COG5	COG7	psi-mi:MI:0019(coimmunoprecipitation)
Q9UP83	P83436	COG5	COG7	psi-mi:MI:0019(coimmunoprecipitation)
Q9Y2V7	Q9H9E3	COG6	COG4	psi-mi:MI:0006(anti bait coimmunoprecipitation)
P83436	Q96JB2	COG7	COG3	psi-mi:MI:0006(anti bait coimmunoprecipitation)
P83436	Q96JB2	COG7	COG3	psi-mi:MI:0006(anti bait coimmunoprecipitation)
P83436	Q9H9E3	COG7	COG4	psi-mi:MI:0006(anti bait coimmunoprecipitation)
P83436	Q9H9E3	COG7	COG4	psi-mi:MI:0006(anti bait coimmunoprecipitation)
P83436	Q96MW5	COG7	COG8	psi-mi:MI:0006(anti bait coimmunoprecipitation)
P83436	Q96MW5	COG7	COG8	psi-mi:MI:0006(anti bait coimmunoprecipitation)
P83436	Q8WVM8	COG7	SCFD1	psi-mi:MI:0006(anti bait coimmunoprecipitation)
P83436	Q9H9E3	COG7	COG4	psi-mi:MI:0019(coimmunoprecipitation)
P83436	Q9H9E3	COG7	COG4	psi-mi:MI:0019(coimmunoprecipitation)
P83436	Q9UP83	COG7	COG5	psi-mi:MI:0019(coimmunoprecipitation)
P83436	Q9UP83	COG7	COG5	psi-mi:MI:0019(coimmunoprecipitation)
Q8TF09	Q2M1P5	DYNLRB2	KIF7	psi-mi:MI:0676(tandem affinity purification)
Q9H6Z9	Q2M1P5	EGLN3	KIF7	psi-mi:MI:0007(anti tag coimmunoprecipitation)
Q92731	Q9Y2V7	ESR2	COG6	psi-mi:MI:0676(tandem affinity purification)
Q92731	Q12840	ESR2	KIF5A	psi-mi:MI:0676(tandem affinity purification)
Q99853	Q9UP83	FOXB1	COG5	psi-mi:MI:0676(tandem affinity purification)
Q12952	Q9UP83	FOXL1	COG5	psi-mi:MI:0676(tandem affinity purification)
Q12952	Q6NUQ1	FOXL1	RINT1	psi-mi:MI:0676(tandem affinity purification)
O14976	Q9Y496	GAK	KIF3A	psi-mi:MI:0007(anti tag coimmunoprecipitation)
P08151	Q2M1P5	GLI1	KIF7	psi-mi:MI:0676(tandem affinity purification)
Q13547	Q9H9E3	HDAC1	COG4	psi-mi:MI:0007(anti tag coimmunoprecipitation)
Q32P51	Q15058	HNRNPA1L2	KIF14	psi-mi:MI:0007(anti tag coimmunoprecipitation)
Q9ULD6	Q9Y496	INTU	KIF3A	psi-mi:MI:0676(tandem affinity purification)
Q13352	Q8WTW3	ITGB3BP	COG1	psi-mi:MI:0007(anti tag coimmunoprecipitation)
P05412	Q9Y2V7	JUN	COG6	psi-mi:MI:0006(anti bait coimmunoprecipitation)
P05412	Q12840	JUN	KIF5A	psi-mi:MI:0006(anti bait coimmunoprecipitation)
Q8IYT4	Q15058	KATNAL2	KIF14	psi-mi:MI:0676(tandem affinity purification)
Q15058	A0A0S2Z528	KIF14	PSTPIP1	psi-mi:MI:0006(anti bait coimmunoprecipitation)
Q15058	O43353	KIF14	RIPK2	psi-mi:MI:0006(anti bait coimmunoprecipitation)
Q15058	P56385	KIF14	ATP5ME	psi-mi:MI:0007(anti tag coimmunoprecipitation)
Q15058	Q96EK5	KIF14	KIF1BP	psi-mi:MI:0007(anti tag coimmunoprecipitation)
Q15058	Q9UM00	KIF14	TMCO1	psi-mi:MI:0007(anti tag coimmunoprecipitation)
Q15058	O60287	KIF14	URB1	psi-mi:MI:0007(anti tag coimmunoprecipitation)
O00139	Q99661	KIF2A	KIF2C	psi-mi:MI:0007(anti tag coimmunoprecipitation)
Q99661	Q13443	KIF2C	ADAM9	psi-mi:MI:0007(anti tag coimmunoprecipitation)
Q99661	Q9P287	KIF2C	BCCIP	psi-mi:MI:0007(anti tag coimmunoprecipitation)
Q99661	P55201	KIF2C	BRPF1	psi-mi:MI:0007(anti tag coimmunoprecipitation)
Q99661	Q53HL2	KIF2C	CDCA8	psi-mi:MI:0007(anti tag coimmunoprecipitation)
Q99661	P07199	KIF2C	CENPB	psi-mi:MI:0007(anti tag coimmunoprecipitation)
Q99661	Q5SW79	KIF2C	CEP170	psi-mi:MI:0007(anti tag coimmunoprecipitation)
Q99661	Q14674	KIF2C	ESPL1	psi-mi:MI:0007(anti tag coimmunoprecipitation)
Q99661	P35269	KIF2C	GTF2F1	psi-mi:MI:0007(anti tag coimmunoprecipitation)
Q99661	O00139	KIF2C	KIF2A	psi-mi:MI:0007(anti tag coimmunoprecipitation)
Q99661	Q5XKE5	KIF2C	KRT79	psi-mi:MI:0007(anti tag coimmunoprecipitation)
Q99661	Q9UIS9	KIF2C	MBD1	psi-mi:MI:0007(anti tag coimmunoprecipitation)
Q99661	Q86TS9	KIF2C	MRPL52	psi-mi:MI:0007(anti tag coimmunoprecipitation)
Q99661	Q5JR59	KIF2C	MTUS2	psi-mi:MI:0007(anti tag coimmunoprecipitation)
Q99661	Q86SE9	KIF2C	PCGF5	psi-mi:MI:0007(anti tag coimmunoprecipitation)
Q99661	Q99575	KIF2C	POP1	psi-mi:MI:0007(anti tag coimmunoprecipitation)
Q99661	P46777	KIF2C	RPL5	psi-mi:MI:0007(anti tag coimmunoprecipitation)
Q99661	P18124	KIF2C	RPL7	psi-mi:MI:0007(anti tag coimmunoprecipitation)
Q99661	P32969	KIF2C	RPL9	psi-mi:MI:0007(anti tag coimmunoprecipitation)
Q99661	P62851	KIF2C	RPS25	psi-mi:MI:0007(anti tag coimmunoprecipitation)
Q99661	Q5JTH9	KIF2C	RRP12	psi-mi:MI:0007(anti tag coimmunoprecipitation)
Q99661	Q9BRK5	KIF2C	SDF4	psi-mi:MI:0007(anti tag coimmunoprecipitation)
Q99661	Q8NHU3	KIF2C	SGMS2	psi-mi:MI:0007(anti tag coimmunoprecipitation)
Q99661	O43295	KIF2C	SRGAP3	psi-mi:MI:0007(anti tag coimmunoprecipitation)
Q99661	Q9P0N9	KIF2C	TBC1D7	psi-mi:MI:0007(anti tag coimmunoprecipitation)
Q99661	Q9NXF1	KIF2C	TEX10	psi-mi:MI:0007(anti tag coimmunoprecipitation)
Q99661	Q9BV38	KIF2C	WDR18	psi-mi:MI:0007(anti tag coimmunoprecipitation)
Q99661	O43379	KIF2C	WDR62	psi-mi:MI:0007(anti tag coimmunoprecipitation)
Q99661	Q96K58	KIF2C	ZNF668	psi-mi:MI:0007(anti tag coimmunoprecipitation)
Q99661	Q15691	KIF2C	MAPRE1	psi-mi:MI:0096(pull down)
Q99661	Q5JR59	KIF2C	MTUS2	psi-mi:MI:0096(pull down)
Q9Y496	Q92845	KIF3A	KIFAP3	psi-mi:MI:0006(anti bait coimmunoprecipitation)
Q9Y496	Q8WYA6	KIF3A	CTNNBL1	psi-mi:MI:0007(anti tag coimmunoprecipitation)
Q9Y496	Q14147	KIF3A	DHX34	psi-mi:MI:0007(anti tag coimmunoprecipitation)
Q9Y496	Q9GZU8	KIF3A	FAM192A	psi-mi:MI:0007(anti tag coimmunoprecipitation)
Q9Y496	O15066	KIF3A	KIF3B	psi-mi:MI:0007(anti tag coimmunoprecipitation)
Q9Y496	Q92845	KIF3A	KIFAP3	psi-mi:MI:0007(anti tag coimmunoprecipitation)
Q9Y496	P62826	KIF3A	RAN	psi-mi:MI:0007(anti tag coimmunoprecipitation)
Q9Y496	Q76I76	KIF3A	SSH2	psi-mi:MI:0007(anti tag coimmunoprecipitation)
Q9Y496	O00203	KIF3A	AP3B1	psi-mi:MI:0096(pull down)
Q9Y496	Q9BXF6	KIF3A	RAB11FIP5	psi-mi:MI:0096(pull down)
O15066	Q9Y496	KIF3B	KIF3A	psi-mi:MI:0676(tandem affinity purification)
O14782	Q9Y496	KIF3C	KIF3A	psi-mi:MI:0007(anti tag coimmunoprecipitation)
Q12840	Q96NW4	KIF5A	ANKRD27	psi-mi:MI:0007(anti tag coimmunoprecipitation)
Q12840	Q9UPV9	KIF5A	TRAK1	psi-mi:MI:0007(anti tag coimmunoprecipitation)
Q2M1P5	O96019	KIF7	ACTL6A	psi-mi:MI:0007(anti tag coimmunoprecipitation)
Q2M1P5	P25054	KIF7	APC	psi-mi:MI:0007(anti tag coimmunoprecipitation)
Q2M1P5	Q96RK4	KIF7	BBS4	psi-mi:MI:0007(anti tag coimmunoprecipitation)
Q2M1P5	Q5T9S5	KIF7	CCDC18	psi-mi:MI:0007(anti tag coimmunoprecipitation)
Q2M1P5	Q9Y6R9	KIF7	CCDC61	psi-mi:MI:0007(anti tag coimmunoprecipitation)
Q2M1P5	Q9BR77	KIF7	CCDC77	psi-mi:MI:0007(anti tag coimmunoprecipitation)
Q2M1P5	Q9UPN4	KIF7	CEP131	psi-mi:MI:0007(anti tag coimmunoprecipitation)
Q2M1P5	Q9P209	KIF7	CEP72	psi-mi:MI:0007(anti tag coimmunoprecipitation)
Q2M1P5	Q96HP0	KIF7	DOCK6	psi-mi:MI:0007(anti tag coimmunoprecipitation)
Q2M1P5	Q7Z589	KIF7	EMSY	psi-mi:MI:0007(anti tag coimmunoprecipitation)
Q2M1P5	Q9Y2J2	KIF7	EPB41L3	psi-mi:MI:0007(anti tag coimmunoprecipitation)
Q2M1P5	P49915	KIF7	GMPS	psi-mi:MI:0007(anti tag coimmunoprecipitation)
Q2M1P5	P98160	KIF7	HSPG2	psi-mi:MI:0007(anti tag coimmunoprecipitation)
Q2M1P5	Q9P2X3	KIF7	IMPACT	psi-mi:MI:0007(anti tag coimmunoprecipitation)
Q2M1P5	J3KNB8	KIF7	MAP3K4	psi-mi:MI:0007(anti tag coimmunoprecipitation)
Q2M1P5	O95297	KIF7	MPZL1	psi-mi:MI:0007(anti tag coimmunoprecipitation)
Q2M1P5	O15049	KIF7	N4BP3	psi-mi:MI:0007(anti tag coimmunoprecipitation)
Q2M1P5	O43847	KIF7	NRDC	psi-mi:MI:0007(anti tag coimmunoprecipitation)
Q2M1P5	Q15154	KIF7	PCM1	psi-mi:MI:0007(anti tag coimmunoprecipitation)
Q2M1P5	Q15154	KIF7	PCM1	psi-mi:MI:0007(anti tag coimmunoprecipitation)
Q2M1P5	Q86SQ0	KIF7	PHLDB2	psi-mi:MI:0007(anti tag coimmunoprecipitation)
Q2M1P5	Q8WXW3	KIF7	PIBF1	psi-mi:MI:0007(anti tag coimmunoprecipitation)
Q2M1P5	Q7L804	KIF7	RAB11FIP2	psi-mi:MI:0007(anti tag coimmunoprecipitation)
Q2M1P5	Q99708	KIF7	RBBP8	psi-mi:MI:0007(anti tag coimmunoprecipitation)
Q2M1P5	Q9ULF5	KIF7	SLC39A10	psi-mi:MI:0007(anti tag coimmunoprecipitation)
Q2M1P5	P53814	KIF7	SMTN	psi-mi:MI:0007(anti tag coimmunoprecipitation)
Q2M1P5	Q9Y2D8	KIF7	SSX2IP	psi-mi:MI:0007(anti tag coimmunoprecipitation)
Q2M1P5	O95630	KIF7	STAMBP	psi-mi:MI:0007(anti tag coimmunoprecipitation)
Q2M1P5	Q7Z7C8	KIF7	TAF8	psi-mi:MI:0007(anti tag coimmunoprecipitation)
Q2M1P5	E7ERK7	KIF7	TBC1D31	psi-mi:MI:0007(anti tag coimmunoprecipitation)
Q9HAQ2	A2RRP1	KIF9	NBAS	psi-mi:MI:0006(anti bait coimmunoprecipitation)
Q9HAQ2	Q96LA8	KIF9	PRMT6	psi-mi:MI:0007(anti tag coimmunoprecipitation)
Q92845	Q9Y496	KIFAP3	KIF3A	psi-mi:MI:0006(anti bait coimmunoprecipitation)
Q92845	Q9Y496	KIFAP3	KIF3A	psi-mi:MI:0007(anti tag coimmunoprecipitation)
Q92845	Q9Y496	KIFAP3	KIF3A	psi-mi:MI:0007(anti tag coimmunoprecipitation)
Q92845	Q9Y496	KIFAP3	KIF3A	psi-mi:MI:0676(tandem affinity purification)
Q9BVG8	H7C1U3	KIFC3	CC2D1B	psi-mi:MI:0007(anti tag coimmunoprecipitation)
Q9BVG8	Q5SW79	KIFC3	CEP170	psi-mi:MI:0007(anti tag coimmunoprecipitation)
Q9BVG8	Q5SW79	KIFC3	CEP170	psi-mi:MI:0007(anti tag coimmunoprecipitation)
Q9BVG8	Q14247	KIFC3	CTTN	psi-mi:MI:0007(anti tag coimmunoprecipitation)
Q9BVG8	Q9Y4B6	KIFC3	DCAF1	psi-mi:MI:0007(anti tag coimmunoprecipitation)
Q9BVG8	Q8IYD8	KIFC3	FANCM	psi-mi:MI:0007(anti tag coimmunoprecipitation)
Q9BVG8	O95714	KIFC3	HERC2	psi-mi:MI:0007(anti tag coimmunoprecipitation)
Q9BVG8	Q9P2N7	KIFC3	KLHL13	psi-mi:MI:0007(anti tag coimmunoprecipitation)
Q9BVG8	J3KRN4	KIFC3	MAP3K3	psi-mi:MI:0007(anti tag coimmunoprecipitation)
Q9BVG8	O60318	KIFC3	MCM3AP	psi-mi:MI:0007(anti tag coimmunoprecipitation)
Q9BVG8	Q6T4R5	KIFC3	NHS	psi-mi:MI:0007(anti tag coimmunoprecipitation)
Q9BVG8	Q9H0X9	KIFC3	OSBPL5	psi-mi:MI:0007(anti tag coimmunoprecipitation)
Q9BVG8	P83876	KIFC3	TXNL4A	psi-mi:MI:0007(anti tag coimmunoprecipitation)
Q9BVG8	O43379	KIFC3	WDR62	psi-mi:MI:0007(anti tag coimmunoprecipitation)
Q9BVG8	O15062	KIFC3	ZBTB5	psi-mi:MI:0007(anti tag coimmunoprecipitation)
Q9NSK0	Q15058	KLC4	KIF14	psi-mi:MI:0007(anti tag coimmunoprecipitation)
Q86WU2	O43264	LDHD	ZW10	psi-mi:MI:0007(anti tag coimmunoprecipitation)
Q15691	Q99661	MAPRE1	KIF2C	psi-mi:MI:0007(anti tag coimmunoprecipitation)
Q15691	Q99661	MAPRE1	KIF2C	psi-mi:MI:0096(pull down)
Q15691	Q99661	MAPRE1	KIF2C	psi-mi:MI:0096(pull down)
Q15691	Q99661	MAPRE1	KIF2C	psi-mi:MI:0096(pull down)
Q15691	Q99661	MAPRE1	KIF2C	psi-mi:MI:0676(tandem affinity purification)
P10636	O43264	MAPT	ZW10	psi-mi:MI:0006(anti bait coimmunoprecipitation)
P46013	O43264	MKI67	ZW10	psi-mi:MI:0007(anti tag coimmunoprecipitation)
Q5JR59	Q99661	MTUS2	KIF2C	psi-mi:MI:0096(pull down)
P01106	Q9UIL4	MYC	KIF25	psi-mi:MI:0676(tandem affinity purification)
A2RRP1	Q6NUQ1	NBAS	RINT1	psi-mi:MI:0006(anti bait coimmunoprecipitation)
A2RRP1	Q6NUQ1	NBAS	RINT1	psi-mi:MI:0006(anti bait coimmunoprecipitation)
A2RRP1	O43264	NBAS	ZW10	psi-mi:MI:0006(anti bait coimmunoprecipitation)
A2RRP1	O43264	NBAS	ZW10	psi-mi:MI:0006(anti bait coimmunoprecipitation)
A2RRP1	Q6NUQ1	NBAS	RINT1	psi-mi:MI:0007(anti tag coimmunoprecipitation)
A2RRP1	Q6NUQ1	NBAS	RINT1	psi-mi:MI:0007(anti tag coimmunoprecipitation)
A2RRP1	Q6NUQ1	NBAS	RINT1	psi-mi:MI:0007(anti tag coimmunoprecipitation)
A2RRP1	O43264	NBAS	ZW10	psi-mi:MI:0007(anti tag coimmunoprecipitation)
A2RRP1	O43264	NBAS	ZW10	psi-mi:MI:0007(anti tag coimmunoprecipitation)
A2RRP1	O43264	NBAS	ZW10	psi-mi:MI:0007(anti tag coimmunoprecipitation)
O14777	O43264	NDC80	ZW10	psi-mi:MI:0006(anti bait coimmunoprecipitation)
O14777	O43264	NDC80	ZW10	psi-mi:MI:0096(pull down)
P46531	Q9Y496	NOTCH1	KIF3A	psi-mi:MI:0676(tandem affinity purification)
Q9BZD4	Q9Y496	NUF2	KIF3A	psi-mi:MI:0007(anti tag coimmunoprecipitation)
O75665	Q9BVG8	OFD1	KIFC3	psi-mi:MI:0007(anti tag coimmunoprecipitation)
Q15154	Q2M1P5	PCM1	KIF7	psi-mi:MI:0007(anti tag coimmunoprecipitation)
Q9BXF6	Q9Y496	RAB11FIP5	KIF3A	psi-mi:MI:0096(pull down)
Q06330	Q99661	RBPJ	KIF2C	psi-mi:MI:0676(tandem affinity purification)
Q6NUQ1	P35606	RINT1	COPB2	psi-mi:MI:0006(anti bait coimmunoprecipitation)
Q6NUQ1	P35606	RINT1	COPB2	psi-mi:MI:0006(anti bait coimmunoprecipitation)
Q6NUQ1	P35606	RINT1	COPB2	psi-mi:MI:0006(anti bait coimmunoprecipitation)
Q6NUQ1	A2RRP1	RINT1	NBAS	psi-mi:MI:0006(anti bait coimmunoprecipitation)
Q6NUQ1	A2RRP1	RINT1	NBAS	psi-mi:MI:0006(anti bait coimmunoprecipitation)
Q6NUQ1	A2RRP1	RINT1	NBAS	psi-mi:MI:0006(anti bait coimmunoprecipitation)
Q6NUQ1	A2RRP1	RINT1	NBAS	psi-mi:MI:0006(anti bait coimmunoprecipitation)
Q6NUQ1	A2RRP1	RINT1	NBAS	psi-mi:MI:0006(anti bait coimmunoprecipitation)
Q6NUQ1	Q9P2W9	RINT1	STX18	psi-mi:MI:0006(anti bait coimmunoprecipitation)
Q6NUQ1	Q9P2Y5	RINT1	UVRAG	psi-mi:MI:0006(anti bait coimmunoprecipitation)
Q6NUQ1	Q9P2Y5	RINT1	UVRAG	psi-mi:MI:0006(anti bait coimmunoprecipitation)
Q6NUQ1	Q9P2Y5	RINT1	UVRAG	psi-mi:MI:0006(anti bait coimmunoprecipitation)
Q6NUQ1	O43264	RINT1	ZW10	psi-mi:MI:0006(anti bait coimmunoprecipitation)
Q6NUQ1	O43264	RINT1	ZW10	psi-mi:MI:0006(anti bait coimmunoprecipitation)
Q6NUQ1	A0A0S2Z6P0	RINT1	ZNF688	psi-mi:MI:0006(anti bait coimmunoprecipitation)
Q6NUQ1	O43264	RINT1	ZW10	psi-mi:MI:0006(anti bait coimmunoprecipitation)
Q6NUQ1	O43264	RINT1	ZW10	psi-mi:MI:0006(anti bait coimmunoprecipitation)
Q6NUQ1	O43264	RINT1	ZW10	psi-mi:MI:0006(anti bait coimmunoprecipitation)
Q6NUQ1	O43264	RINT1	ZW10	psi-mi:MI:0006(anti bait coimmunoprecipitation)
Q6NUQ1	O43264	RINT1	ZW10	psi-mi:MI:0006(anti bait coimmunoprecipitation)
Q6NUQ1	O43264	RINT1	ZW10	psi-mi:MI:0006(anti bait coimmunoprecipitation)
Q6NUQ1	O43264	RINT1	ZW10	psi-mi:MI:0006(anti bait coimmunoprecipitation)
Q6NUQ1	O43264	RINT1	ZW10	psi-mi:MI:0006(anti bait coimmunoprecipitation)
Q6NUQ1	O43264	RINT1	ZW10	psi-mi:MI:0006(anti bait coimmunoprecipitation)
Q6NUQ1	A2RRP1	RINT1	NBAS	psi-mi:MI:0007(anti tag coimmunoprecipitation)
Q6NUQ1	O43264	RINT1	ZW10	psi-mi:MI:0007(anti tag coimmunoprecipitation)
Q6NUQ1	O43264	RINT1	ZW10	psi-mi:MI:0007(anti tag coimmunoprecipitation)
P27694	Q9Y496	RPA1	KIF3A	psi-mi:MI:0007(anti tag coimmunoprecipitation)
Q8WVM8	Q96JB2	SCFD1	COG3	psi-mi:MI:0007(anti tag coimmunoprecipitation)
Q8WVM8	Q9H9E3	SCFD1	COG4	psi-mi:MI:0007(anti tag coimmunoprecipitation)
Q8WVM8	Q9H9E3	SCFD1	COG4	psi-mi:MI:0007(anti tag coimmunoprecipitation)
Q8WVM8	P83436	SCFD1	COG7	psi-mi:MI:0007(anti tag coimmunoprecipitation)
Q8WVM8	Q9H9E3	SCFD1	COG4	psi-mi:MI:0096(pull down)
Q8WVM8	Q9H9E3	SCFD1	COG4	psi-mi:MI:0096(pull down)
Q96NL6	Q6NUQ1	SCLT1	RINT1	psi-mi:MI:0007(anti tag coimmunoprecipitation)
Q5FBB7	Q99661	SGO1	KIF2C	psi-mi:MI:0007(anti tag coimmunoprecipitation)
Q562F6	Q99661	SGO2	KIF2C	psi-mi:MI:0006(anti bait coimmunoprecipitation)
O00400	O43264	SLC33A1	ZW10	psi-mi:MI:0007(anti tag coimmunoprecipitation)
Q13573	Q99661	SNW1	KIF2C	psi-mi:MI:0006(anti bait coimmunoprecipitation)
Q13188	Q99661	STK3	KIF2C	psi-mi:MI:0007(anti tag coimmunoprecipitation)
Q13043	Q99661	STK4	KIF2C	psi-mi:MI:0007(anti tag coimmunoprecipitation)
P27105	O43264	STOM	ZW10	psi-mi:MI:0676(tandem affinity purification)
Q9P2W9	Q6NUQ1	STX18	RINT1	psi-mi:MI:0006(anti bait coimmunoprecipitation)
Q9P2W9	Q6NUQ1	STX18	RINT1	psi-mi:MI:0006(anti bait coimmunoprecipitation)
Q9P2W9	O43264	STX18	ZW10	psi-mi:MI:0006(anti bait coimmunoprecipitation)
Q9P2W9	O43264	STX18	ZW10	psi-mi:MI:0006(anti bait coimmunoprecipitation)
Q13190	Q9H9E3	STX5	COG4	psi-mi:MI:0096(pull down)
Q92973	Q9P2E2	TNPO1	KIF17	psi-mi:MI:0007(anti tag coimmunoprecipitation)
Q71U36	Q15058	TUBA1A	KIF14	psi-mi:MI:0096(pull down)
Q71U36	Q15058	TUBA1A	KIF14	psi-mi:MI:0096(pull down)
Q9BQE3	Q15058	TUBA1C	KIF14	psi-mi:MI:0007(anti tag coimmunoprecipitation)
Q9NZ43	Q6NUQ1	USE1	RINT1	psi-mi:MI:0006(anti bait coimmunoprecipitation)
Q9NZ43	Q6NUQ1	USE1	RINT1	psi-mi:MI:0006(anti bait coimmunoprecipitation)
Q9NZ43	Q6NUQ1	USE1	RINT1	psi-mi:MI:0006(anti bait coimmunoprecipitation)
Q9NZ43	O43264	USE1	ZW10	psi-mi:MI:0006(anti bait coimmunoprecipitation)
Q9NZ43	O43264	USE1	ZW10	psi-mi:MI:0006(anti bait coimmunoprecipitation)
Q9NZ43	O43264	USE1	ZW10	psi-mi:MI:0006(anti bait coimmunoprecipitation)
Q9NZ43	Q6NUQ1	USE1	RINT1	psi-mi:MI:0007(anti tag coimmunoprecipitation)
Q9NZ43	O43264	USE1	ZW10	psi-mi:MI:0007(anti tag coimmunoprecipitation)
Q9NZ43	Q6NUQ1	USE1	RINT1	psi-mi:MI:0096(pull down)
Q9NZ43	Q6NUQ1	USE1	RINT1	psi-mi:MI:0096(pull down)
Q9NZ43	O43264	USE1	ZW10	psi-mi:MI:0096(pull down)
Q9UPT9	Q2M1P5	USP22	KIF7	psi-mi:MI:0007(anti tag coimmunoprecipitation)
Q9UPT9	Q2M1P5	USP22	KIF7	psi-mi:MI:0007(anti tag coimmunoprecipitation)
Q93009	Q9Y496	USP7	KIF3A	psi-mi:MI:0007(anti tag coimmunoprecipitation)
Q9P2Y5	Q6NUQ1	UVRAG	RINT1	psi-mi:MI:0006(anti bait coimmunoprecipitation)
Q9P2Y5	Q6NUQ1	UVRAG	RINT1	psi-mi:MI:0006(anti bait coimmunoprecipitation)
Q9P2Y5	Q6NUQ1	UVRAG	RINT1	psi-mi:MI:0006(anti bait coimmunoprecipitation)
Q9P2Y5	Q6NUQ1	UVRAG	RINT1	psi-mi:MI:0006(anti bait coimmunoprecipitation)
Q9P2Y5	Q6NUQ1	UVRAG	RINT1	psi-mi:MI:0006(anti bait coimmunoprecipitation)
Q9P2Y5	Q9HAQ2	UVRAG	KIF9	psi-mi:MI:0006(anti bait coimmunoprecipitation)
Q9P2Y5	Q6NUQ1	UVRAG	RINT1	psi-mi:MI:0006(anti bait coimmunoprecipitation)
Q9P2Y5	O43264	UVRAG	ZW10	psi-mi:MI:0006(anti bait coimmunoprecipitation)
Q9P2Y5	O43264	UVRAG	ZW10	psi-mi:MI:0006(anti bait coimmunoprecipitation)
Q9P2Y5	O43264	UVRAG	ZW10	psi-mi:MI:0006(anti bait coimmunoprecipitation)
Q9P2Y5	O43264	UVRAG	ZW10	psi-mi:MI:0006(anti bait coimmunoprecipitation)
Q9P2Y5	O43264	UVRAG	ZW10	psi-mi:MI:0006(anti bait coimmunoprecipitation)
Q9P2Y5	O43264	UVRAG	ZW10	psi-mi:MI:0006(anti bait coimmunoprecipitation)
Q9P2Y5	Q6NUQ1	UVRAG	RINT1	psi-mi:MI:0007(anti tag coimmunoprecipitation)
Q9P2Y5	Q6NUQ1	UVRAG	RINT1	psi-mi:MI:0007(anti tag coimmunoprecipitation)
Q9P2Y5	Q6NUQ1	UVRAG	RINT1	psi-mi:MI:0007(anti tag coimmunoprecipitation)
Q9P2Y5	Q6NUQ1	UVRAG	RINT1	psi-mi:MI:0007(anti tag coimmunoprecipitation)
Q9P2Y5	Q6NUQ1	UVRAG	RINT1	psi-mi:MI:0007(anti tag coimmunoprecipitation)
Q9P2Y5	Q6NUQ1	UVRAG	RINT1	psi-mi:MI:0007(anti tag coimmunoprecipitation)
Q9P2Y5	O43264	UVRAG	ZW10	psi-mi:MI:0007(anti tag coimmunoprecipitation)
Q9P2Y5	O43264	UVRAG	ZW10	psi-mi:MI:0007(anti tag coimmunoprecipitation)
Q9P2Y5	O43264	UVRAG	ZW10	psi-mi:MI:0007(anti tag coimmunoprecipitation)
Q9P2Y5	Q6NUQ1	UVRAG	RINT1	psi-mi:MI:0096(pull down)
Q4G0F5	Q12840	VPS26B	KIF5A	psi-mi:MI:0007(anti tag coimmunoprecipitation)
Q9UID3	Q9BVG8	VPS51	KIFC3	psi-mi:MI:0676(tandem affinity purification)
O43542	O43264	XRCC3	ZW10	psi-mi:MI:0007(anti tag coimmunoprecipitation)
A0A0S2Z6P0	O75365	ZNF688	PTP4A3	psi-mi:MI:0006(anti bait coimmunoprecipitation)
A0A0S2Z6P0	Q6NUQ1	ZNF688	RINT1	psi-mi:MI:0006(anti bait coimmunoprecipitation)
A0A0S2Z6P0	Q6NUQ1	ZNF688	RINT1	psi-mi:MI:0006(anti bait coimmunoprecipitation)
A0A0S2Z6P0	Q6NUQ1	ZNF688	RINT1	psi-mi:MI:0006(anti bait coimmunoprecipitation)
O43264	Q9HAW0	ZW10	BRF2	psi-mi:MI:0006(anti bait coimmunoprecipitation)
O43264	P35606	ZW10	COPB2	psi-mi:MI:0006(anti bait coimmunoprecipitation)
O43264	P35606	ZW10	COPB2	psi-mi:MI:0006(anti bait coimmunoprecipitation)
O43264	Q9Y2Q3	ZW10	GSTK1	psi-mi:MI:0006(anti bait coimmunoprecipitation)
O43264	P50748	ZW10	KNTC1	psi-mi:MI:0006(anti bait coimmunoprecipitation)
O43264	A2RRP1	ZW10	NBAS	psi-mi:MI:0006(anti bait coimmunoprecipitation)
O43264	A2RRP1	ZW10	NBAS	psi-mi:MI:0006(anti bait coimmunoprecipitation)
O43264	A2RRP1	ZW10	NBAS	psi-mi:MI:0006(anti bait coimmunoprecipitation)
O43264	A2RRP1	ZW10	NBAS	psi-mi:MI:0006(anti bait coimmunoprecipitation)
O43264	Q9Y5J5	ZW10	PHLDA3	psi-mi:MI:0006(anti bait coimmunoprecipitation)
O43264	Q9HAQ2	ZW10	KIF9	psi-mi:MI:0006(anti bait coimmunoprecipitation)
O43264	Q9HAQ2	ZW10	KIF9	psi-mi:MI:0006(anti bait coimmunoprecipitation)
O43264	Q9HAQ2	ZW10	KIF9	psi-mi:MI:0006(anti bait coimmunoprecipitation)
O43264	Q9HAQ2	ZW10	KIF9	psi-mi:MI:0006(anti bait coimmunoprecipitation)
O43264	Q9HAQ2	ZW10	KIF9	psi-mi:MI:0006(anti bait coimmunoprecipitation)
O43264	Q9P2W9	ZW10	STX18	psi-mi:MI:0006(anti bait coimmunoprecipitation)
O43264	Q15714	ZW10	TSC22D1	psi-mi:MI:0006(anti bait coimmunoprecipitation)
O43264	Q9P2Y5	ZW10	UVRAG	psi-mi:MI:0006(anti bait coimmunoprecipitation)
O43264	Q9P2Y5	ZW10	UVRAG	psi-mi:MI:0006(anti bait coimmunoprecipitation)
O43264	Q9P2Y5	ZW10	UVRAG	psi-mi:MI:0006(anti bait coimmunoprecipitation)
O43264	Q9H900	ZW10	ZWILCH	psi-mi:MI:0006(anti bait coimmunoprecipitation)
O43264	Q9H900	ZW10	ZWILCH	psi-mi:MI:0006(anti bait coimmunoprecipitation)
O43264	P50748	ZW10	KNTC1	psi-mi:MI:0007(anti tag coimmunoprecipitation)
O43264	A2RRP1	ZW10	NBAS	psi-mi:MI:0007(anti tag coimmunoprecipitation)
O43264	Q6NUQ1	ZW10	RINT1	psi-mi:MI:0007(anti tag coimmunoprecipitation)
O43264	Q6NUQ1	ZW10	RINT1	psi-mi:MI:0007(anti tag coimmunoprecipitation)
O43264	Q9H900	ZW10	ZWILCH	psi-mi:MI:0007(anti tag coimmunoprecipitation)
O43264	O95229	ZW10	ZWINT	psi-mi:MI:0007(anti tag coimmunoprecipitation)
O43264	O14777	ZW10	NDC80	psi-mi:MI:0096(pull down)
O43264	Q6NUQ1	ZW10	RINT1	psi-mi:MI:0096(pull down)
O43264	Q6NUQ1	ZW10	RINT1	psi-mi:MI:0096(pull down)
O43264	O95229	ZW10	ZWINT	psi-mi:MI:0096(pull down)
O43264	Q9UFG5	ZW10	C19orf25	psi-mi:MI:0676(tandem affinity purification)
O43264	P50748	ZW10	KNTC1	psi-mi:MI:0676(tandem affinity purification)
O43264	Q6NUQ1	ZW10	RINT1	psi-mi:MI:0676(tandem affinity purification)
O43264	Q6NUQ1	ZW10	RINT1	psi-mi:MI:0676(tandem affinity purification)
O43264	Q9H900	ZW10	ZWILCH	psi-mi:MI:0676(tandem affinity purification)
O95229	O43264	ZWINT	ZW10	psi-mi:MI:0096(pull down)

## Sheet: Network3
UniProtA	UniProtB	GeneA	GeneB	Interaction detection method
O95477	P52732	ABCA1	KIF11	psi-mi:MI:0007(anti tag coimmunoprecipitation)
O95477	P52732	ABCA1	KIF11	psi-mi:MI:0007(anti tag coimmunoprecipitation)
Q96NW4	Q12840	ANKRD27	KIF5A	psi-mi:MI:0006(anti bait coimmunoprecipitation)
Q96NW4	Q12840	ANKRD27	KIF5A	psi-mi:MI:0007(anti tag coimmunoprecipitation)
P62330	Q02241	ARF6	KIF23	psi-mi:MI:0096(pull down)
P62330	Q02241	ARF6	KIF23	psi-mi:MI:0096(pull down)
P62330	P62820	ARF6	RAB1A	psi-mi:MI:0114(x-ray crystallography)
Q9Y6D6	Q7Z4S6	ARFGEF1	KIF21A	psi-mi:MI:0006(anti bait coimmunoprecipitation)
Q9Y6D6	Q7Z4S6	ARFGEF1	KIF21A	psi-mi:MI:0006(anti bait coimmunoprecipitation)
Q9Y6D6	Q7Z4S6	ARFGEF1	KIF21A	psi-mi:MI:0006(anti bait coimmunoprecipitation)
P49407	P62820	ARRB1	RAB1A	psi-mi:MI:0007(anti tag coimmunoprecipitation)
P49407	Q9ULI4	ARRB1	KIF26A	psi-mi:MI:0007(anti tag coimmunoprecipitation)
P15336	P61019	ATF2	RAB2A	psi-mi:MI:0007(anti tag coimmunoprecipitation)
A0AUL9	P62820	ATG2A	RAB1A	psi-mi:MI:0007(anti tag coimmunoprecipitation)
Q6DD88	P62820	ATL3	RAB1A	psi-mi:MI:0007(anti tag coimmunoprecipitation)
Q9NR09	Q02241	BIRC6	KIF23	psi-mi:MI:0006(anti bait coimmunoprecipitation)
Q9NR09	Q02241	BIRC6	KIF23	psi-mi:MI:0007(anti tag coimmunoprecipitation)
O43683	Q2KJY2	BUB1	KIF26B	psi-mi:MI:0007(anti tag coimmunoprecipitation)
O60566	Q02224	BUB1B	CENPE	psi-mi:MI:0006(anti bait coimmunoprecipitation)
O60566	Q02224	BUB1B	CENPE	psi-mi:MI:0006(anti bait coimmunoprecipitation)
O60566	Q02224	BUB1B	CENPE	psi-mi:MI:0007(anti tag coimmunoprecipitation)
Q96LT7	P62820	C9orf72	RAB1A	psi-mi:MI:0007(anti tag coimmunoprecipitation)
Q96LT7	P62820	C9orf72	RAB1A	psi-mi:MI:0007(anti tag coimmunoprecipitation)
Q96LT7	P62820	C9orf72	RAB1A	psi-mi:MI:0096(pull down)
Q96LT7	P62820	C9orf72	RAB1A	psi-mi:MI:0096(pull down)
Q96LT7	P62820	C9orf72	RAB1A	psi-mi:MI:0096(pull down)
P07384	Q8WTW3	CAPN1	COG1	psi-mi:MI:0007(anti tag coimmunoprecipitation)
P47755	P62820	CAPZA2	RAB1A	psi-mi:MI:0007(anti tag coimmunoprecipitation)
Q14781	Q02224	CBX2	CENPE	psi-mi:MI:0676(tandem affinity purification)
Q49A88	Q15058	CCDC14	KIF14	psi-mi:MI:0007(anti tag coimmunoprecipitation)
Q99459	Q7Z4S6	CDC5L	KIF21A	psi-mi:MI:0006(anti bait coimmunoprecipitation)
Q99459	P52732	CDC5L	KIF11	psi-mi:MI:0006(anti bait coimmunoprecipitation)
Q02224	Q9BZD4	CENPE	NUF2	psi-mi:MI:0006(anti bait coimmunoprecipitation)
Q02224	Q9BZD4	CENPE	NUF2	psi-mi:MI:0006(anti bait coimmunoprecipitation)
Q02224	Q8N3V7	CENPE	SYNPO	psi-mi:MI:0007(anti tag coimmunoprecipitation)
Q02224	O95425	CENPE	SVIL	psi-mi:MI:0007(anti tag coimmunoprecipitation)
Q02224	Q13813	CENPE	SPTAN1	psi-mi:MI:0007(anti tag coimmunoprecipitation)
Q02224	Q15154	CENPE	PCM1	psi-mi:MI:0007(anti tag coimmunoprecipitation)
Q02224	O75665	CENPE	OFD1	psi-mi:MI:0007(anti tag coimmunoprecipitation)
Q02224	Q9BZD4	CENPE	NUF2	psi-mi:MI:0007(anti tag coimmunoprecipitation)
Q02224	Q96A35	CENPE	MRPL24	psi-mi:MI:0007(anti tag coimmunoprecipitation)
Q02224	Q8IVT2	CENPE	MISP	psi-mi:MI:0007(anti tag coimmunoprecipitation)
Q02224	O75122	CENPE	CLASP2	psi-mi:MI:0007(anti tag coimmunoprecipitation)
Q02224	Q9UPN4	CENPE	CEP131	psi-mi:MI:0007(anti tag coimmunoprecipitation)
Q02224	Q9NS39	CENPE	ADARB2	psi-mi:MI:0007(anti tag coimmunoprecipitation)
Q02224	Q9BZD4	CENPE	NUF2	psi-mi:MI:0096(pull down)
Q14746	Q9H9E3	COG2	COG4	psi-mi:MI:0019(coimmunoprecipitation)
Q14746	Q9H9E3	COG2	COG4	psi-mi:MI:0019(coimmunoprecipitation)
Q96JB2	Q8WVM8	COG3	SCFD1	psi-mi:MI:0006(anti bait coimmunoprecipitation)
Q96JB2	Q96MW5	COG3	COG8	psi-mi:MI:0006(anti bait coimmunoprecipitation)
Q96JB2	Q96MW5	COG3	COG8	psi-mi:MI:0006(anti bait coimmunoprecipitation)
Q96JB2	P83436	COG3	COG7	psi-mi:MI:0006(anti bait coimmunoprecipitation)
Q96JB2	P83436	COG3	COG7	psi-mi:MI:0006(anti bait coimmunoprecipitation)
Q96JB2	Q9H9E3	COG3	COG4	psi-mi:MI:0006(anti bait coimmunoprecipitation)
Q96JB2	Q9H9E3	COG3	COG4	psi-mi:MI:0006(anti bait coimmunoprecipitation)
Q9H9E3	Q8WVM8	COG4	SCFD1	psi-mi:MI:0006(anti bait coimmunoprecipitation)
Q9H9E3	Q96MW5	COG4	COG8	psi-mi:MI:0006(anti bait coimmunoprecipitation)
Q9H9E3	Q96MW5	COG4	COG8	psi-mi:MI:0006(anti bait coimmunoprecipitation)
Q9H9E3	P83436	COG4	COG7	psi-mi:MI:0006(anti bait coimmunoprecipitation)
Q9H9E3	P83436	COG4	COG7	psi-mi:MI:0006(anti bait coimmunoprecipitation)
Q9H9E3	Q96JB2	COG4	COG3	psi-mi:MI:0006(anti bait coimmunoprecipitation)
Q9H9E3	Q96JB2	COG4	COG3	psi-mi:MI:0006(anti bait coimmunoprecipitation)
Q9H9E3	Q8WVM8	COG4	SCFD1	psi-mi:MI:0007(anti tag coimmunoprecipitation)
Q9H9E3	Q8WVM8	COG4	SCFD1	psi-mi:MI:0007(anti tag coimmunoprecipitation)
Q9H9E3	P83436	COG4	COG7	psi-mi:MI:0019(coimmunoprecipitation)
Q9H9E3	P83436	COG4	COG7	psi-mi:MI:0019(coimmunoprecipitation)
Q9H9E3	Q9UP83	COG4	COG5	psi-mi:MI:0019(coimmunoprecipitation)
Q9H9E3	Q9UP83	COG4	COG5	psi-mi:MI:0019(coimmunoprecipitation)
Q9H9E3	Q14746	COG4	COG2	psi-mi:MI:0019(coimmunoprecipitation)
Q9H9E3	Q14746	COG4	COG2	psi-mi:MI:0019(coimmunoprecipitation)
Q9H9E3	Q8WTW3	COG4	COG1	psi-mi:MI:0019(coimmunoprecipitation)
Q9H9E3	Q8WTW3	COG4	COG1	psi-mi:MI:0019(coimmunoprecipitation)
Q9H9E3	Q8WTW3	COG4	COG1	psi-mi:MI:0019(coimmunoprecipitation)
Q9H9E3	Q8WTW3	COG4	COG1	psi-mi:MI:0019(coimmunoprecipitation)
Q9H9E3	Q13190	COG4	STX5	psi-mi:MI:0096(pull down)
Q9H9E3	Q8WVM8	COG4	SCFD1	psi-mi:MI:0096(pull down)
Q9H9E3	Q8WVM8	COG4	SCFD1	psi-mi:MI:0096(pull down)
Q9UP83	P83436	COG5	COG7	psi-mi:MI:0019(coimmunoprecipitation)
Q9UP83	P83436	COG5	COG7	psi-mi:MI:0019(coimmunoprecipitation)
Q9UP83	Q9H9E3	COG5	COG4	psi-mi:MI:0019(coimmunoprecipitation)
Q9UP83	Q9H9E3	COG5	COG4	psi-mi:MI:0019(coimmunoprecipitation)
Q9Y2V7	Q9H9E3	COG6	COG4	psi-mi:MI:0006(anti bait coimmunoprecipitation)
P83436	Q8WVM8	COG7	SCFD1	psi-mi:MI:0006(anti bait coimmunoprecipitation)
P83436	Q96MW5	COG7	COG8	psi-mi:MI:0006(anti bait coimmunoprecipitation)
P83436	Q96MW5	COG7	COG8	psi-mi:MI:0006(anti bait coimmunoprecipitation)
P83436	Q9H9E3	COG7	COG4	psi-mi:MI:0006(anti bait coimmunoprecipitation)
P83436	Q9H9E3	COG7	COG4	psi-mi:MI:0006(anti bait coimmunoprecipitation)
P83436	Q96JB2	COG7	COG3	psi-mi:MI:0006(anti bait coimmunoprecipitation)
P83436	Q96JB2	COG7	COG3	psi-mi:MI:0006(anti bait coimmunoprecipitation)
P83436	Q9UP83	COG7	COG5	psi-mi:MI:0019(coimmunoprecipitation)
P83436	Q9UP83	COG7	COG5	psi-mi:MI:0019(coimmunoprecipitation)
P83436	Q9H9E3	COG7	COG4	psi-mi:MI:0019(coimmunoprecipitation)
P83436	Q9H9E3	COG7	COG4	psi-mi:MI:0019(coimmunoprecipitation)
Q13620	Q9NS87	CUL4B	KIF15	psi-mi:MI:0007(anti tag coimmunoprecipitation)
Q16643	P62820	DBN1	RAB1A	psi-mi:MI:0007(anti tag coimmunoprecipitation)
Q8WYQ5	Q9NS87	DGCR8	KIF15	psi-mi:MI:0007(anti tag coimmunoprecipitation)
P63167	Q7Z4S6	DYNLL1	KIF21A	psi-mi:MI:0007(anti tag coimmunoprecipitation)
Q9H8V3	Q02241	ECT2	KIF23	psi-mi:MI:0006(anti bait coimmunoprecipitation)
Q92731	Q12840	ESR2	KIF5A	psi-mi:MI:0676(tandem affinity purification)
Q92731	Q9Y2V7	ESR2	COG6	psi-mi:MI:0676(tandem affinity purification)
Q99853	Q9UP83	FOXB1	COG5	psi-mi:MI:0676(tandem affinity purification)
Q12952	Q6NUQ1	FOXL1	RINT1	psi-mi:MI:0676(tandem affinity purification)
Q12952	Q9UP83	FOXL1	COG5	psi-mi:MI:0676(tandem affinity purification)
Q9H0R8	P62820	GABARAPL1	RAB1A	psi-mi:MI:0007(anti tag coimmunoprecipitation)
P23771	P52732	GATA3	KIF11	psi-mi:MI:0007(anti tag coimmunoprecipitation)
P31150	P62820	GDI1	RAB1A	psi-mi:MI:0007(anti tag coimmunoprecipitation)
P31150	P62820	GDI1	RAB1A	psi-mi:MI:0096(pull down)
P62993	Q9ULI4	GRB2	KIF26A	psi-mi:MI:0006(anti bait coimmunoprecipitation)
Q9NYZ3	P62820	GTSE1	RAB1A	psi-mi:MI:0007(anti tag coimmunoprecipitation)
Q13547	Q9H9E3	HDAC1	COG4	psi-mi:MI:0007(anti tag coimmunoprecipitation)
Q32P51	Q15058	HNRNPA1L2	KIF14	psi-mi:MI:0007(anti tag coimmunoprecipitation)
Q15051	P62820	IQCB1	RAB1A	psi-mi:MI:0007(anti tag coimmunoprecipitation)
Q13352	Q8WTW3	ITGB3BP	COG1	psi-mi:MI:0007(anti tag coimmunoprecipitation)
P05412	P62820	JUN	RAB1A	psi-mi:MI:0006(anti bait coimmunoprecipitation)
P05412	P62820	JUN	RAB1A	psi-mi:MI:0006(anti bait coimmunoprecipitation)
P05412	Q12840	JUN	KIF5A	psi-mi:MI:0006(anti bait coimmunoprecipitation)
P05412	Q9Y2V7	JUN	COG6	psi-mi:MI:0006(anti bait coimmunoprecipitation)
Q14678	Q7Z4S6	KANK1	KIF21A	psi-mi:MI:0006(anti bait coimmunoprecipitation)
Q14678	Q7Z4S6	KANK1	KIF21A	psi-mi:MI:0006(anti bait coimmunoprecipitation)
Q14678	Q7Z4S6	KANK1	KIF21A	psi-mi:MI:0007(anti tag coimmunoprecipitation)
Q8IYT4	Q2KJY2	KATNAL2	KIF26B	psi-mi:MI:0676(tandem affinity purification)
Q8IYT4	Q15058	KATNAL2	KIF14	psi-mi:MI:0676(tandem affinity purification)
Q8IYT4	P52732	KATNAL2	KIF11	psi-mi:MI:0676(tandem affinity purification)
P52732	Q15776	KIF11	ZKSCAN8	psi-mi:MI:0007(anti tag coimmunoprecipitation)
P52732	Q86YA3	KIF11	ZGRF1	psi-mi:MI:0007(anti tag coimmunoprecipitation)
P52732	Q15650	KIF11	TRIP4	psi-mi:MI:0007(anti tag coimmunoprecipitation)
P52732	H0Y2M0	KIF11	TMEM131L	psi-mi:MI:0007(anti tag coimmunoprecipitation)
P52732	Q9Y490	KIF11	TLN1	psi-mi:MI:0007(anti tag coimmunoprecipitation)
P52732	O43463	KIF11	SUV39H1	psi-mi:MI:0007(anti tag coimmunoprecipitation)
P52732	Q8WWL2	KIF11	SPIRE2	psi-mi:MI:0007(anti tag coimmunoprecipitation)
P52732	Q86XZ4	KIF11	SPATS2	psi-mi:MI:0007(anti tag coimmunoprecipitation)
P52732	P62318	KIF11	SNRPD3	psi-mi:MI:0007(anti tag coimmunoprecipitation)
P52732	P62753	KIF11	RPS6	psi-mi:MI:0007(anti tag coimmunoprecipitation)
P52732	P61247	KIF11	RPS3A	psi-mi:MI:0007(anti tag coimmunoprecipitation)
P52732	P62266	KIF11	RPS23	psi-mi:MI:0007(anti tag coimmunoprecipitation)
P52732	P61513	KIF11	RPL37A	psi-mi:MI:0007(anti tag coimmunoprecipitation)
P52732	Q969Q0	KIF11	RPL36AL	psi-mi:MI:0007(anti tag coimmunoprecipitation)
P52732	P62910	KIF11	RPL32	psi-mi:MI:0007(anti tag coimmunoprecipitation)
P52732	P46779	KIF11	RPL28	psi-mi:MI:0007(anti tag coimmunoprecipitation)
P52732	P62750	KIF11	RPL23A	psi-mi:MI:0007(anti tag coimmunoprecipitation)
P52732	Q8IUH3	KIF11	RBM45	psi-mi:MI:0007(anti tag coimmunoprecipitation)
P52732	Q9NW13	KIF11	RBM28	psi-mi:MI:0007(anti tag coimmunoprecipitation)
P52732	P79522	KIF11	PRR3	psi-mi:MI:0007(anti tag coimmunoprecipitation)
P52732	P17252	KIF11	PRKCA	psi-mi:MI:0007(anti tag coimmunoprecipitation)
P52732	Q9UL41	KIF11	PNMA3	psi-mi:MI:0007(anti tag coimmunoprecipitation)
P52732	Q9HAU0	KIF11	PLEKHA5	psi-mi:MI:0007(anti tag coimmunoprecipitation)
P52732	P08237	KIF11	PFKM	psi-mi:MI:0007(anti tag coimmunoprecipitation)
P52732	Q14432	KIF11	PDE3A	psi-mi:MI:0007(anti tag coimmunoprecipitation)
P52732	Q5JVF3	KIF11	PCID2	psi-mi:MI:0007(anti tag coimmunoprecipitation)
P52732	Q13416	KIF11	ORC2	psi-mi:MI:0007(anti tag coimmunoprecipitation)
P52732	Q86UY8	KIF11	NT5DC3	psi-mi:MI:0007(anti tag coimmunoprecipitation)
P52732	Q14978	KIF11	NOLC1	psi-mi:MI:0007(anti tag coimmunoprecipitation)
P52732	Q9UMY1	KIF11	NOL7	psi-mi:MI:0007(anti tag coimmunoprecipitation)
P52732	O00159	KIF11	MYO1C	psi-mi:MI:0007(anti tag coimmunoprecipitation)
P52732	Q9ULD2	KIF11	MTUS1	psi-mi:MI:0007(anti tag coimmunoprecipitation)
P52732	D6RAN8	KIF11	MRPL27	psi-mi:MI:0007(anti tag coimmunoprecipitation)
P52732	Q9BVC4	KIF11	MLST8	psi-mi:MI:0007(anti tag coimmunoprecipitation)
P52732	O60244	KIF11	MED14	psi-mi:MI:0007(anti tag coimmunoprecipitation)
P52732	O60244	KIF11	MED14	psi-mi:MI:0007(anti tag coimmunoprecipitation)
P52732	E7EVA0	KIF11	MAP4	psi-mi:MI:0007(anti tag coimmunoprecipitation)
P52732	Q86V48	KIF11	LUZP1	psi-mi:MI:0007(anti tag coimmunoprecipitation)
P52732	P00338	KIF11	LDHA	psi-mi:MI:0007(anti tag coimmunoprecipitation)
P52732	P07942	KIF11	LAMB1	psi-mi:MI:0007(anti tag coimmunoprecipitation)
P52732	Q03164	KIF11	KMT2A	psi-mi:MI:0007(anti tag coimmunoprecipitation)
P52732	Q9NWZ3	KIF11	IRAK4	psi-mi:MI:0007(anti tag coimmunoprecipitation)
P52732	A1L0T0	KIF11	ILVBL	psi-mi:MI:0007(anti tag coimmunoprecipitation)
P52732	Q9UJY1	KIF11	HSPB8	psi-mi:MI:0007(anti tag coimmunoprecipitation)
P52732	P68431	KIF11	HIST1H3A	psi-mi:MI:0007(anti tag coimmunoprecipitation)
P52732	P68431	KIF11	HIST1H3A	psi-mi:MI:0007(anti tag coimmunoprecipitation)
P52732	O60814	KIF11	HIST1H2BK	psi-mi:MI:0007(anti tag coimmunoprecipitation)
P52732	Q00341	KIF11	HDLBP	psi-mi:MI:0007(anti tag coimmunoprecipitation)
P52732	K7EK07	KIF11	H3F3B	psi-mi:MI:0007(anti tag coimmunoprecipitation)
P52732	K7EK07	KIF11	H3F3B	psi-mi:MI:0007(anti tag coimmunoprecipitation)
P52732	Q9BZE4	KIF11	GTPBP4	psi-mi:MI:0007(anti tag coimmunoprecipitation)
P52732	Q4VC44	KIF11	FLYWCH1	psi-mi:MI:0007(anti tag coimmunoprecipitation)
P52732	P49327	KIF11	FASN	psi-mi:MI:0007(anti tag coimmunoprecipitation)
P52732	P49327	KIF11	FASN	psi-mi:MI:0007(anti tag coimmunoprecipitation)
P52732	Q96E09	KIF11	FAM122A	psi-mi:MI:0007(anti tag coimmunoprecipitation)
P52732	Q13347	KIF11	EIF3I	psi-mi:MI:0007(anti tag coimmunoprecipitation)
P52732	Q14152	KIF11	EIF3A	psi-mi:MI:0007(anti tag coimmunoprecipitation)
P52732	Q6P2E9	KIF11	EDC4	psi-mi:MI:0007(anti tag coimmunoprecipitation)
P52732	Q9NP97	KIF11	DYNLRB1	psi-mi:MI:0007(anti tag coimmunoprecipitation)
P52732	O75319	KIF11	DUSP11	psi-mi:MI:0007(anti tag coimmunoprecipitation)
P52732	Q6UX07	KIF11	DHRS13	psi-mi:MI:0007(anti tag coimmunoprecipitation)
P52732	Q8WYQ5	KIF11	DGCR8	psi-mi:MI:0007(anti tag coimmunoprecipitation)
P52732	Q16698	KIF11	DECR1	psi-mi:MI:0007(anti tag coimmunoprecipitation)
P52732	Q8N8A6	KIF11	DDX51	psi-mi:MI:0007(anti tag coimmunoprecipitation)
P52732	P41208	KIF11	CETN2	psi-mi:MI:0007(anti tag coimmunoprecipitation)
P52732	Q5VT06	KIF11	CEP350	psi-mi:MI:0007(anti tag coimmunoprecipitation)
P52732	Q9C0D2	KIF11	CEP295	psi-mi:MI:0007(anti tag coimmunoprecipitation)
P52732	Q05682	KIF11	CALD1	psi-mi:MI:0007(anti tag coimmunoprecipitation)
P52732	Q8N8R5	KIF11	C2orf69	psi-mi:MI:0007(anti tag coimmunoprecipitation)
P52732	P55201	KIF11	BRPF1	psi-mi:MI:0007(anti tag coimmunoprecipitation)
P52732	Q4LE39	KIF11	ARID4B	psi-mi:MI:0007(anti tag coimmunoprecipitation)
P52732	Q9Y2T2	KIF11	AP3M1	psi-mi:MI:0007(anti tag coimmunoprecipitation)
P52732	O94973	KIF11	AP2A2	psi-mi:MI:0007(anti tag coimmunoprecipitation)
P52732	P04083	KIF11	ANXA1	psi-mi:MI:0007(anti tag coimmunoprecipitation)
P52732	Q68DC2	KIF11	ANKS6	psi-mi:MI:0007(anti tag coimmunoprecipitation)
P52732	Q86XL3	KIF11	ANKLE2	psi-mi:MI:0007(anti tag coimmunoprecipitation)
P52732	Q12955	KIF11	ANK3	psi-mi:MI:0007(anti tag coimmunoprecipitation)
P52732	Q9NS39	KIF11	ADARB2	psi-mi:MI:0007(anti tag coimmunoprecipitation)
P52732	Q9NZ32	KIF11	ACTR10	psi-mi:MI:0007(anti tag coimmunoprecipitation)
P52732	Q9ULC5	KIF11	ACSL5	psi-mi:MI:0007(anti tag coimmunoprecipitation)
P52732	O95573	KIF11	ACSL3	psi-mi:MI:0007(anti tag coimmunoprecipitation)
P52732	Q14164	KIF11	IKBKE	psi-mi:MI:0676(tandem affinity purification)
Q15058	O43353	KIF14	RIPK2	psi-mi:MI:0006(anti bait coimmunoprecipitation)
Q15058	A0A0S2Z528	KIF14	PSTPIP1	psi-mi:MI:0006(anti bait coimmunoprecipitation)
Q15058	O60287	KIF14	URB1	psi-mi:MI:0007(anti tag coimmunoprecipitation)
Q15058	Q9UM00	KIF14	TMCO1	psi-mi:MI:0007(anti tag coimmunoprecipitation)
Q15058	Q96EK5	KIF14	KIF1BP	psi-mi:MI:0007(anti tag coimmunoprecipitation)
Q15058	P56385	KIF14	ATP5ME	psi-mi:MI:0007(anti tag coimmunoprecipitation)
Q9NS87	Q9HAU5	KIF15	UPF2	psi-mi:MI:0007(anti tag coimmunoprecipitation)
Q9NS87	H0Y7P7	KIF15	PISD	psi-mi:MI:0007(anti tag coimmunoprecipitation)
Q9NS87	Q9H9J2	KIF15	MRPL44	psi-mi:MI:0007(anti tag coimmunoprecipitation)
Q9NS87	Q9BV20	KIF15	MRI1	psi-mi:MI:0007(anti tag coimmunoprecipitation)
Q9NS87	O75586	KIF15	MED6	psi-mi:MI:0007(anti tag coimmunoprecipitation)
Q9NS87	Q96EK5	KIF15	KIF1BP	psi-mi:MI:0007(anti tag coimmunoprecipitation)
Q9NS87	Q96EK5	KIF15	KIF1BP	psi-mi:MI:0007(anti tag coimmunoprecipitation)
Q9NS87	Q96AT1	KIF15	KIAA1143	psi-mi:MI:0007(anti tag coimmunoprecipitation)
Q9NS87	O15287	KIF15	FANCG	psi-mi:MI:0007(anti tag coimmunoprecipitation)
Q9NS87	Q96BJ8	KIF15	ELMO3	psi-mi:MI:0007(anti tag coimmunoprecipitation)
Q9NS87	E9PDN5	KIF15	DMD	psi-mi:MI:0007(anti tag coimmunoprecipitation)
Q9NS87	Q9Y5K6	KIF15	CD2AP	psi-mi:MI:0007(anti tag coimmunoprecipitation)
O95235	P55072	KIF20A	VCP	psi-mi:MI:0007(anti tag coimmunoprecipitation)
O95235	Q9H0U9	KIF20A	TSPYL1	psi-mi:MI:0007(anti tag coimmunoprecipitation)
O95235	O95271	KIF20A	TNKS	psi-mi:MI:0007(anti tag coimmunoprecipitation)
O95235	O60232	KIF20A	SSSCA1	psi-mi:MI:0007(anti tag coimmunoprecipitation)
O95235	Q9H0E3	KIF20A	SAP130	psi-mi:MI:0007(anti tag coimmunoprecipitation)
O95235	Q9H3S7	KIF20A	PTPN23	psi-mi:MI:0007(anti tag coimmunoprecipitation)
O95235	Q6P5Z2	KIF20A	PKN3	psi-mi:MI:0007(anti tag coimmunoprecipitation)
O95235	O43175	KIF20A	PHGDH	psi-mi:MI:0007(anti tag coimmunoprecipitation)
O95235	Q14980	KIF20A	NUMA1	psi-mi:MI:0007(anti tag coimmunoprecipitation)
O95235	I3L2W2	KIF20A	NEURL4	psi-mi:MI:0007(anti tag coimmunoprecipitation)
O95235	O95243	KIF20A	MBD4	psi-mi:MI:0007(anti tag coimmunoprecipitation)
O95235	Q9UIS9	KIF20A	MBD1	psi-mi:MI:0007(anti tag coimmunoprecipitation)
O95235	P32019	KIF20A	INPP5B	psi-mi:MI:0007(anti tag coimmunoprecipitation)
O95235	Q96MM7	KIF20A	HS6ST2	psi-mi:MI:0007(anti tag coimmunoprecipitation)
O95235	O95714	KIF20A	HERC2	psi-mi:MI:0007(anti tag coimmunoprecipitation)
O95235	P07199	KIF20A	CENPB	psi-mi:MI:0007(anti tag coimmunoprecipitation)
O95235	Q53HL2	KIF20A	CDCA8	psi-mi:MI:0007(anti tag coimmunoprecipitation)
O95235	Q9BWT7	KIF20A	CARD10	psi-mi:MI:0007(anti tag coimmunoprecipitation)
Q7Z4S6	Q9Y6D6	KIF21A	ARFGEF1	psi-mi:MI:0006(anti bait coimmunoprecipitation)
Q7Z4S6	Q96K58	KIF21A	ZNF668	psi-mi:MI:0007(anti tag coimmunoprecipitation)
Q7Z4S6	Q9H2Y7	KIF21A	ZNF106	psi-mi:MI:0007(anti tag coimmunoprecipitation)
Q7Z4S6	P11441	KIF21A	UBL4A	psi-mi:MI:0007(anti tag coimmunoprecipitation)
Q7Z4S6	Q8N5M4	KIF21A	TTC9C	psi-mi:MI:0007(anti tag coimmunoprecipitation)
Q7Z4S6	P17987	KIF21A	TCP1	psi-mi:MI:0007(anti tag coimmunoprecipitation)
Q7Z4S6	O15119	KIF21A	TBX3	psi-mi:MI:0007(anti tag coimmunoprecipitation)
Q7Z4S6	E9PBC6	KIF21A	TACC2	psi-mi:MI:0007(anti tag coimmunoprecipitation)
Q7Z4S6	Q5XPI4	KIF21A	RNF123	psi-mi:MI:0007(anti tag coimmunoprecipitation)
Q7Z4S6	Q9BWF3	KIF21A	RBM4	psi-mi:MI:0007(anti tag coimmunoprecipitation)
Q7Z4S6	Q06609	KIF21A	RAD51	psi-mi:MI:0007(anti tag coimmunoprecipitation)
Q7Z4S6	Q7L804	KIF21A	RAB11FIP2	psi-mi:MI:0007(anti tag coimmunoprecipitation)
Q7Z4S6	Q86W92	KIF21A	PPFIBP1	psi-mi:MI:0007(anti tag coimmunoprecipitation)
Q7Z4S6	P51805	KIF21A	PLXNA3	psi-mi:MI:0007(anti tag coimmunoprecipitation)
Q7Z4S6	E9PJ24	KIF21A	PHRF1	psi-mi:MI:0007(anti tag coimmunoprecipitation)
Q7Z4S6	Q9UHV9	KIF21A	PFDN2	psi-mi:MI:0007(anti tag coimmunoprecipitation)
Q7Z4S6	O60925	KIF21A	PFDN1	psi-mi:MI:0007(anti tag coimmunoprecipitation)
Q7Z4S6	O15381	KIF21A	NVL	psi-mi:MI:0007(anti tag coimmunoprecipitation)
Q7Z4S6	Q14978	KIF21A	NOLC1	psi-mi:MI:0007(anti tag coimmunoprecipitation)
Q7Z4S6	Q76FK4	KIF21A	NOL8	psi-mi:MI:0007(anti tag coimmunoprecipitation)
Q7Z4S6	B4DF87	KIF21A	NCOA4	psi-mi:MI:0007(anti tag coimmunoprecipitation)
Q7Z4S6	Q96DH6	KIF21A	MSI2	psi-mi:MI:0007(anti tag coimmunoprecipitation)
Q7Z4S6	J3KNB8	KIF21A	MAP3K4	psi-mi:MI:0007(anti tag coimmunoprecipitation)
Q7Z4S6	Q7Z4S6	KIF21A	KIF21A	psi-mi:MI:0007(anti tag coimmunoprecipitation)
Q7Z4S6	Q7Z4S6	KIF21A	KIF21A	psi-mi:MI:0007(anti tag coimmunoprecipitation)
Q7Z4S6	Q63ZY3	KIF21A	KANK2	psi-mi:MI:0007(anti tag coimmunoprecipitation)
Q7Z4S6	Q14678	KIF21A	KANK1	psi-mi:MI:0007(anti tag coimmunoprecipitation)
Q7Z4S6	Q14678	KIF21A	KANK1	psi-mi:MI:0007(anti tag coimmunoprecipitation)
Q7Z4S6	Q14678	KIF21A	KANK1	psi-mi:MI:0007(anti tag coimmunoprecipitation)
Q7Z4S6	Q14678	KIF21A	KANK1	psi-mi:MI:0007(anti tag coimmunoprecipitation)
Q7Z4S6	Q6UN15	KIF21A	FIP1L1	psi-mi:MI:0007(anti tag coimmunoprecipitation)
Q7Z4S6	O94919	KIF21A	ENDOD1	psi-mi:MI:0007(anti tag coimmunoprecipitation)
Q7Z4S6	Q86XP1	KIF21A	DGKH	psi-mi:MI:0007(anti tag coimmunoprecipitation)
Q7Z4S6	Q8TCZ2	KIF21A	CD99L2	psi-mi:MI:0007(anti tag coimmunoprecipitation)
Q7Z4S6	P50990	KIF21A	CCT8	psi-mi:MI:0007(anti tag coimmunoprecipitation)
Q7Z4S6	Q99832	KIF21A	CCT7	psi-mi:MI:0007(anti tag coimmunoprecipitation)
Q7Z4S6	P40227	KIF21A	CCT6A	psi-mi:MI:0007(anti tag coimmunoprecipitation)
Q7Z4S6	P48643	KIF21A	CCT5	psi-mi:MI:0007(anti tag coimmunoprecipitation)
Q7Z4S6	P50991	KIF21A	CCT4	psi-mi:MI:0007(anti tag coimmunoprecipitation)
Q7Z4S6	P49368	KIF21A	CCT3	psi-mi:MI:0007(anti tag coimmunoprecipitation)
Q7Z4S6	P78371	KIF21A	CCT2	psi-mi:MI:0007(anti tag coimmunoprecipitation)
Q7Z4S6	Q0P5T2	KIF21A	C6orf136	psi-mi:MI:0007(anti tag coimmunoprecipitation)
Q7Z4S6	Q9Y6D6	KIF21A	ARFGEF1	psi-mi:MI:0007(anti tag coimmunoprecipitation)
Q7Z4S6	Q14678	KIF21A	KANK1	psi-mi:MI:0096(pull down)
Q02241	P27348	KIF23	YWHAQ	psi-mi:MI:0006(anti bait coimmunoprecipitation)
Q02241	P61981	KIF23	YWHAG	psi-mi:MI:0006(anti bait coimmunoprecipitation)
Q02241	P31946	KIF23	YWHAB	psi-mi:MI:0006(anti bait coimmunoprecipitation)
Q02241	Q9H0H5	KIF23	RACGAP1	psi-mi:MI:0006(anti bait coimmunoprecipitation)
Q02241	Q9H0H5	KIF23	RACGAP1	psi-mi:MI:0006(anti bait coimmunoprecipitation)
Q02241	Q16537	KIF23	PPP2R5E	psi-mi:MI:0006(anti bait coimmunoprecipitation)
Q02241	P67775	KIF23	PPP2CA	psi-mi:MI:0006(anti bait coimmunoprecipitation)
Q02241	Q9H8V3	KIF23	ECT2	psi-mi:MI:0006(anti bait coimmunoprecipitation)
Q02241	Q04917	KIF23	YWHAH	psi-mi:MI:0007(anti tag coimmunoprecipitation)
Q02241	P61981	KIF23	YWHAG	psi-mi:MI:0007(anti tag coimmunoprecipitation)
Q02241	P31946	KIF23	YWHAB	psi-mi:MI:0007(anti tag coimmunoprecipitation)
Q02241	Q93009	KIF23	USP7	psi-mi:MI:0007(anti tag coimmunoprecipitation)
Q02241	Q8NEM2	KIF23	SHCBP1	psi-mi:MI:0007(anti tag coimmunoprecipitation)
Q02241	Q9H0H5	KIF23	RACGAP1	psi-mi:MI:0007(anti tag coimmunoprecipitation)
Q02241	Q86SQ0	KIF23	PHLDB2	psi-mi:MI:0007(anti tag coimmunoprecipitation)
Q02241	Q7RTP6	KIF23	MICAL3	psi-mi:MI:0007(anti tag coimmunoprecipitation)
Q02241	J3KNB8	KIF23	MAP3K4	psi-mi:MI:0007(anti tag coimmunoprecipitation)
Q02241	P42858	KIF23	HTT	psi-mi:MI:0007(anti tag coimmunoprecipitation)
Q02241	Q8IUD2	KIF23	ERC1	psi-mi:MI:0007(anti tag coimmunoprecipitation)
Q02241	Q53EZ4	KIF23	CEP55	psi-mi:MI:0007(anti tag coimmunoprecipitation)
Q02241	Q9Y5K6	KIF23	CD2AP	psi-mi:MI:0007(anti tag coimmunoprecipitation)
Q02241	Q9NR09	KIF23	BIRC6	psi-mi:MI:0007(anti tag coimmunoprecipitation)
Q02241	P16615	KIF23	ATP2A2	psi-mi:MI:0007(anti tag coimmunoprecipitation)
Q02241	P61981	KIF23	YWHAG	psi-mi:MI:0019(coimmunoprecipitation)
Q02241	P63104	KIF23	YWHAZ	psi-mi:MI:0096(pull down)
Q02241	P61981	KIF23	YWHAG	psi-mi:MI:0096(pull down)
Q02241	Q9H0H5	KIF23	RACGAP1	psi-mi:MI:0096(pull down)
Q02241	Q7RTP6	KIF23	MICAL3	psi-mi:MI:0096(pull down)
Q02241	Q7RTP6	KIF23	MICAL3	psi-mi:MI:0096(pull down)
Q02241	Q7RTP6	KIF23	MICAL3	psi-mi:MI:0096(pull down)
Q02241	Q7RTP6	KIF23	MICAL3	psi-mi:MI:0096(pull down)
Q02241	Q7RTP6	KIF23	MICAL3	psi-mi:MI:0096(pull down)
Q02241	Q7RTP6	KIF23	MICAL3	psi-mi:MI:0096(pull down)
Q02241	P62330	KIF23	ARF6	psi-mi:MI:0096(pull down)
Q02241	P62330	KIF23	ARF6	psi-mi:MI:0096(pull down)
Q02241	P62330	KIF23	ARF6	psi-mi:MI:0096(pull down)
Q02241	P62330	KIF23	ARF6	psi-mi:MI:0096(pull down)
Q02241	P62330	KIF23	ARF6	psi-mi:MI:0096(pull down)
Q02241	P62330	KIF23	ARF6	psi-mi:MI:0096(pull down)
Q02241	P62330	KIF23	ARF6	psi-mi:MI:0096(pull down)
Q02241	P62330	KIF23	ARF6	psi-mi:MI:0096(pull down)
Q02241	P31947	KIF23	SFN	psi-mi:MI:0676(tandem affinity purification)
Q9ULI4	P14618	KIF26A	PKM	psi-mi:MI:0424(protein kinase assay)
Q2KJY2	Q5T200	KIF26B	ZC3H13	psi-mi:MI:0007(anti tag coimmunoprecipitation)
Q2KJY2	Q9Y2W2	KIF26B	WBP11	psi-mi:MI:0007(anti tag coimmunoprecipitation)
Q2KJY2	Q5T2T1	KIF26B	MPP7	psi-mi:MI:0007(anti tag coimmunoprecipitation)
Q2KJY2	Q9NUP9	KIF26B	LIN7C	psi-mi:MI:0007(anti tag coimmunoprecipitation)
Q2KJY2	Q12959	KIF26B	DLG1	psi-mi:MI:0007(anti tag coimmunoprecipitation)
Q2KJY2	Q75N03	KIF26B	CBLL1	psi-mi:MI:0007(anti tag coimmunoprecipitation)
Q2KJY2	O14936	KIF26B	CASK	psi-mi:MI:0007(anti tag coimmunoprecipitation)
Q2KJY2	Q86XL3	KIF26B	ANKLE2	psi-mi:MI:0007(anti tag coimmunoprecipitation)
Q12840	Q9UPV9	KIF5A	TRAK1	psi-mi:MI:0007(anti tag coimmunoprecipitation)
Q12840	Q96NW4	KIF5A	ANKRD27	psi-mi:MI:0007(anti tag coimmunoprecipitation)
Q9NSK0	Q15058	KLC4	KIF14	psi-mi:MI:0007(anti tag coimmunoprecipitation)
Q8IVT5	Q2KJY2	KSR1	KIF26B	psi-mi:MI:0007(anti tag coimmunoprecipitation)
Q8IVT5	Q2KJY2	KSR1	KIF26B	psi-mi:MI:0007(anti tag coimmunoprecipitation)
Q8IVT5	Q2KJY2	KSR1	KIF26B	psi-mi:MI:0007(anti tag coimmunoprecipitation)
Q86WU2	O43264	LDHD	ZW10	psi-mi:MI:0007(anti tag coimmunoprecipitation)
Q9UHB6	P62820	LIMA1	RAB1A	psi-mi:MI:0007(anti tag coimmunoprecipitation)
Q9Y6D9	Q02224	MAD1L1	CENPE	psi-mi:MI:0006(anti bait coimmunoprecipitation)
Q13257	O95235	MAD2L1	KIF20A	psi-mi:MI:0007(anti tag coimmunoprecipitation)
P10636	O43264	MAPT	ZW10	psi-mi:MI:0006(anti bait coimmunoprecipitation)
Q7RTP6	Q02241	MICAL3	KIF23	psi-mi:MI:0096(pull down)
P46013	O43264	MKI67	ZW10	psi-mi:MI:0007(anti tag coimmunoprecipitation)
P46013	Q9NS87	MKI67	KIF15	psi-mi:MI:0096(pull down)
P46013	Q9NS87	MKI67	KIF15	psi-mi:MI:0096(pull down)
Q13330	P52732	MTA1	KIF11	psi-mi:MI:0007(anti tag coimmunoprecipitation)
P42345	P62820	MTOR	RAB1A	psi-mi:MI:0006(anti bait coimmunoprecipitation)
P01106	Q96FN5	MYC	KIF12	psi-mi:MI:0676(tandem affinity purification)
A2RRP1	O43264	NBAS	ZW10	psi-mi:MI:0006(anti bait coimmunoprecipitation)
A2RRP1	O43264	NBAS	ZW10	psi-mi:MI:0006(anti bait coimmunoprecipitation)
A2RRP1	Q6NUQ1	NBAS	RINT1	psi-mi:MI:0006(anti bait coimmunoprecipitation)
A2RRP1	Q6NUQ1	NBAS	RINT1	psi-mi:MI:0006(anti bait coimmunoprecipitation)
A2RRP1	O43264	NBAS	ZW10	psi-mi:MI:0007(anti tag coimmunoprecipitation)
A2RRP1	O43264	NBAS	ZW10	psi-mi:MI:0007(anti tag coimmunoprecipitation)
A2RRP1	O43264	NBAS	ZW10	psi-mi:MI:0007(anti tag coimmunoprecipitation)
A2RRP1	Q6NUQ1	NBAS	RINT1	psi-mi:MI:0007(anti tag coimmunoprecipitation)
A2RRP1	Q6NUQ1	NBAS	RINT1	psi-mi:MI:0007(anti tag coimmunoprecipitation)
A2RRP1	Q6NUQ1	NBAS	RINT1	psi-mi:MI:0007(anti tag coimmunoprecipitation)
Q53F19	Q02224	NCBP3	CENPE	psi-mi:MI:0096(pull down)
O14777	O43264	NDC80	ZW10	psi-mi:MI:0006(anti bait coimmunoprecipitation)
O14777	O43264	NDC80	ZW10	psi-mi:MI:0096(pull down)
P51957	Q9NS87	NEK4	KIF15	psi-mi:MI:0007(anti tag coimmunoprecipitation)
Q9BZD4	Q02224	NUF2	CENPE	psi-mi:MI:0096(pull down)
Q01968	P62820	OCRL	RAB1A	psi-mi:MI:0007(anti tag coimmunoprecipitation)
Q01968	P62820	OCRL	RAB1A	psi-mi:MI:0096(pull down)
Q01968	P62820	OCRL	RAB1A	psi-mi:MI:0096(pull down)
Q15154	O95235	PCM1	KIF20A	psi-mi:MI:0007(anti tag coimmunoprecipitation)
O75381	P52732	PEX14	KIF11	psi-mi:MI:0096(pull down)
O75381	P52732	PEX14	KIF11	psi-mi:MI:0096(pull down)
P62136	Q02224	PPP1CA	CENPE	psi-mi:MI:0096(pull down)
O75807	P52732	PPP1R15A	KIF11	psi-mi:MI:0007(anti tag coimmunoprecipitation)
O95758	P62820	PTBP3	RAB1A	psi-mi:MI:0006(anti bait coimmunoprecipitation)
O75154	Q02241	RAB11FIP3	KIF23	psi-mi:MI:0007(anti tag coimmunoprecipitation)
P62820	Q8N122	RAB1A	RPTOR	psi-mi:MI:0006(anti bait coimmunoprecipitation)
P62820	P42345	RAB1A	MTOR	psi-mi:MI:0006(anti bait coimmunoprecipitation)
P62820	Q8N122	RAB1A	RPTOR	psi-mi:MI:0007(anti tag coimmunoprecipitation)
P62820	P42345	RAB1A	MTOR	psi-mi:MI:0007(anti tag coimmunoprecipitation)
P62820	Q96LT7	RAB1A	C9orf72	psi-mi:MI:0007(anti tag coimmunoprecipitation)
P62820	Q96LT7	RAB1A	C9orf72	psi-mi:MI:0007(anti tag coimmunoprecipitation)
P62820	O60763	RAB1A	USO1	psi-mi:MI:0096(pull down)
P62820	O60763	RAB1A	USO1	psi-mi:MI:0096(pull down)
P62820	Q01968	RAB1A	OCRL	psi-mi:MI:0096(pull down)
P62820	Q01968	RAB1A	OCRL	psi-mi:MI:0096(pull down)
P62820	Q01968	RAB1A	OCRL	psi-mi:MI:0096(pull down)
P62820	Q14789	RAB1A	GOLGB1	psi-mi:MI:0096(pull down)
P62820	Q14789	RAB1A	GOLGB1	psi-mi:MI:0096(pull down)
P62820	Q08379	RAB1A	GOLGA2	psi-mi:MI:0096(pull down)
P62820	Q01968	RAB1A	OCRL	psi-mi:MI:0411(enzyme linked immunosorbent assay)
P62820	Q5S007	RAB1A	LRRK2	psi-mi:MI:0424(protein kinase assay)
P61019	P40337	RAB2A	VHL	psi-mi:MI:0006(anti bait coimmunoprecipitation)
P61019	P23508	RAB2A	MCC	psi-mi:MI:0006(anti bait coimmunoprecipitation)
P61019	P30480	RAB2A	HLA-B	psi-mi:MI:0006(anti bait coimmunoprecipitation)
P61019	P11171	RAB2A	EPB41	psi-mi:MI:0006(anti bait coimmunoprecipitation)
P61019	Q9BVC6	RAB2A	TMEM109	psi-mi:MI:0007(anti tag coimmunoprecipitation)
P61019	P35610	RAB2A	SOAT1	psi-mi:MI:0007(anti tag coimmunoprecipitation)
P61019	P51149	RAB2A	RAB7A	psi-mi:MI:0007(anti tag coimmunoprecipitation)
P61019	Q9UHX1	RAB2A	PUF60	psi-mi:MI:0007(anti tag coimmunoprecipitation)
P61019	Q99623	RAB2A	PHB2	psi-mi:MI:0007(anti tag coimmunoprecipitation)
P61019	P35232	RAB2A	PHB	psi-mi:MI:0007(anti tag coimmunoprecipitation)
P61019	Q14254	RAB2A	FLOT2	psi-mi:MI:0007(anti tag coimmunoprecipitation)
P61019	O75955	RAB2A	FLOT1	psi-mi:MI:0007(anti tag coimmunoprecipitation)
P61019	Q96HP0	RAB2A	DOCK6	psi-mi:MI:0007(anti tag coimmunoprecipitation)
P61019	P09669	RAB2A	COX6C	psi-mi:MI:0007(anti tag coimmunoprecipitation)
P61019	O43633	RAB2A	CHMP2A	psi-mi:MI:0007(anti tag coimmunoprecipitation)
P61019	Q9NX63	RAB2A	CHCHD3	psi-mi:MI:0007(anti tag coimmunoprecipitation)
P61019	Q6NZI2	RAB2A	CAVIN1	psi-mi:MI:0007(anti tag coimmunoprecipitation)
P61019	C9JKI3	RAB2A	CAV1	psi-mi:MI:0007(anti tag coimmunoprecipitation)
P61019	Q9UI12	RAB2A	ATP6V1H	psi-mi:MI:0007(anti tag coimmunoprecipitation)
P61019	P21281	RAB2A	ATP6V1B2	psi-mi:MI:0007(anti tag coimmunoprecipitation)
P61019	P61421	RAB2A	ATP6V0D1	psi-mi:MI:0007(anti tag coimmunoprecipitation)
P61019	P00966	RAB2A	ASS1	psi-mi:MI:0007(anti tag coimmunoprecipitation)
P61019	Q02952	RAB2A	AKAP12	psi-mi:MI:0007(anti tag coimmunoprecipitation)
P61019	P60709	RAB2A	ACTB	psi-mi:MI:0007(anti tag coimmunoprecipitation)
P61006	P62820	RAB8A	RAB1A	psi-mi:MI:0007(anti tag coimmunoprecipitation)
Q9H0H5	Q02241	RACGAP1	KIF23	psi-mi:MI:0006(anti bait coimmunoprecipitation)
Q9H0H5	Q02241	RACGAP1	KIF23	psi-mi:MI:0006(anti bait coimmunoprecipitation)
Q9H0H5	Q02241	RACGAP1	KIF23	psi-mi:MI:0006(anti bait coimmunoprecipitation)
Q9H0H5	Q02241	RACGAP1	KIF23	psi-mi:MI:0007(anti tag coimmunoprecipitation)
Q9H0H5	Q02241	RACGAP1	KIF23	psi-mi:MI:0096(pull down)
Q6R327	P62820	RICTOR	RAB1A	psi-mi:MI:0007(anti tag coimmunoprecipitation)
Q6NUQ1	O43264	RINT1	ZW10	psi-mi:MI:0006(anti bait coimmunoprecipitation)
Q6NUQ1	O43264	RINT1	ZW10	psi-mi:MI:0006(anti bait coimmunoprecipitation)
Q6NUQ1	O43264	RINT1	ZW10	psi-mi:MI:0006(anti bait coimmunoprecipitation)
Q6NUQ1	O43264	RINT1	ZW10	psi-mi:MI:0006(anti bait coimmunoprecipitation)
Q6NUQ1	O43264	RINT1	ZW10	psi-mi:MI:0006(anti bait coimmunoprecipitation)
Q6NUQ1	O43264	RINT1	ZW10	psi-mi:MI:0006(anti bait coimmunoprecipitation)
Q6NUQ1	O43264	RINT1	ZW10	psi-mi:MI:0006(anti bait coimmunoprecipitation)
Q6NUQ1	O43264	RINT1	ZW10	psi-mi:MI:0006(anti bait coimmunoprecipitation)
Q6NUQ1	O43264	RINT1	ZW10	psi-mi:MI:0006(anti bait coimmunoprecipitation)
Q6NUQ1	O43264	RINT1	ZW10	psi-mi:MI:0006(anti bait coimmunoprecipitation)
Q6NUQ1	O43264	RINT1	ZW10	psi-mi:MI:0006(anti bait coimmunoprecipitation)
Q6NUQ1	O43264	RINT1	ZW10	psi-mi:MI:0006(anti bait coimmunoprecipitation)
Q6NUQ1	Q9P2Y5	RINT1	UVRAG	psi-mi:MI:0006(anti bait coimmunoprecipitation)
Q6NUQ1	Q9P2Y5	RINT1	UVRAG	psi-mi:MI:0006(anti bait coimmunoprecipitation)
Q6NUQ1	Q9P2Y5	RINT1	UVRAG	psi-mi:MI:0006(anti bait coimmunoprecipitation)
Q6NUQ1	Q9P2W9	RINT1	STX18	psi-mi:MI:0006(anti bait coimmunoprecipitation)
Q6NUQ1	A2RRP1	RINT1	NBAS	psi-mi:MI:0006(anti bait coimmunoprecipitation)
Q6NUQ1	A2RRP1	RINT1	NBAS	psi-mi:MI:0006(anti bait coimmunoprecipitation)
Q6NUQ1	A2RRP1	RINT1	NBAS	psi-mi:MI:0006(anti bait coimmunoprecipitation)
Q6NUQ1	A2RRP1	RINT1	NBAS	psi-mi:MI:0006(anti bait coimmunoprecipitation)
Q6NUQ1	A2RRP1	RINT1	NBAS	psi-mi:MI:0006(anti bait coimmunoprecipitation)
Q6NUQ1	A2RRP1	RINT1	NBAS	psi-mi:MI:0006(anti bait coimmunoprecipitation)
Q6NUQ1	P35606	RINT1	COPB2	psi-mi:MI:0006(anti bait coimmunoprecipitation)
Q6NUQ1	P35606	RINT1	COPB2	psi-mi:MI:0006(anti bait coimmunoprecipitation)
Q6NUQ1	P35606	RINT1	COPB2	psi-mi:MI:0006(anti bait coimmunoprecipitation)
Q6NUQ1	O43264	RINT1	ZW10	psi-mi:MI:0007(anti tag coimmunoprecipitation)
Q6NUQ1	O43264	RINT1	ZW10	psi-mi:MI:0007(anti tag coimmunoprecipitation)
Q6NUQ1	A2RRP1	RINT1	NBAS	psi-mi:MI:0007(anti tag coimmunoprecipitation)
Q05823	Q02241	RNASEL	KIF23	psi-mi:MI:0006(anti bait coimmunoprecipitation)
Q15287	Q02241	RNPS1	KIF23	psi-mi:MI:0007(anti tag coimmunoprecipitation)
Q8N122	P62820	RPTOR	RAB1A	psi-mi:MI:0007(anti tag coimmunoprecipitation)
Q14684	Q02241	RRP1B	KIF23	psi-mi:MI:0007(anti tag coimmunoprecipitation)
Q8WVM8	P83436	SCFD1	COG7	psi-mi:MI:0007(anti tag coimmunoprecipitation)
Q8WVM8	Q9H9E3	SCFD1	COG4	psi-mi:MI:0007(anti tag coimmunoprecipitation)
Q8WVM8	Q9H9E3	SCFD1	COG4	psi-mi:MI:0007(anti tag coimmunoprecipitation)
Q8WVM8	Q96JB2	SCFD1	COG3	psi-mi:MI:0007(anti tag coimmunoprecipitation)
Q8WVM8	Q9H9E3	SCFD1	COG4	psi-mi:MI:0096(pull down)
Q8WVM8	Q9H9E3	SCFD1	COG4	psi-mi:MI:0096(pull down)
Q96NL6	Q6NUQ1	SCLT1	RINT1	psi-mi:MI:0007(anti tag coimmunoprecipitation)
Q96NL6	Q02241	SCLT1	KIF23	psi-mi:MI:0007(anti tag coimmunoprecipitation)
O00400	O43264	SLC33A1	ZW10	psi-mi:MI:0007(anti tag coimmunoprecipitation)
Q13573	Q7Z4S6	SNW1	KIF21A	psi-mi:MI:0006(anti bait coimmunoprecipitation)
Q13573	P52732	SNW1	KIF11	psi-mi:MI:0006(anti bait coimmunoprecipitation)
Q15831	Q02241	STK11	KIF23	psi-mi:MI:0007(anti tag coimmunoprecipitation)
P27105	O43264	STOM	ZW10	psi-mi:MI:0676(tandem affinity purification)
Q9P2W9	O43264	STX18	ZW10	psi-mi:MI:0006(anti bait coimmunoprecipitation)
Q9P2W9	O43264	STX18	ZW10	psi-mi:MI:0006(anti bait coimmunoprecipitation)
Q9P2W9	Q6NUQ1	STX18	RINT1	psi-mi:MI:0006(anti bait coimmunoprecipitation)
Q9P2W9	Q6NUQ1	STX18	RINT1	psi-mi:MI:0006(anti bait coimmunoprecipitation)
Q13190	Q9H9E3	STX5	COG4	psi-mi:MI:0096(pull down)
Q9Y6A5	P52732	TACC3	KIF11	psi-mi:MI:0007(anti tag coimmunoprecipitation)
Q96KP6	P52732	TNIP3	KIF11	psi-mi:MI:0007(anti tag coimmunoprecipitation)
Q9H3D4	Q02224	TP63	CENPE	psi-mi:MI:0007(anti tag coimmunoprecipitation)
Q71U36	Q15058	TUBA1A	KIF14	psi-mi:MI:0096(pull down)
Q71U36	Q15058	TUBA1A	KIF14	psi-mi:MI:0096(pull down)
Q9BQE3	Q15058	TUBA1C	KIF14	psi-mi:MI:0007(anti tag coimmunoprecipitation)
Q8IYT8	P52732	ULK2	KIF11	psi-mi:MI:0007(anti tag coimmunoprecipitation)
Q9NZ43	O43264	USE1	ZW10	psi-mi:MI:0006(anti bait coimmunoprecipitation)
Q9NZ43	O43264	USE1	ZW10	psi-mi:MI:0006(anti bait coimmunoprecipitation)
Q9NZ43	O43264	USE1	ZW10	psi-mi:MI:0006(anti bait coimmunoprecipitation)
Q9NZ43	Q6NUQ1	USE1	RINT1	psi-mi:MI:0006(anti bait coimmunoprecipitation)
Q9NZ43	Q6NUQ1	USE1	RINT1	psi-mi:MI:0006(anti bait coimmunoprecipitation)
Q9NZ43	Q6NUQ1	USE1	RINT1	psi-mi:MI:0006(anti bait coimmunoprecipitation)
Q9NZ43	O43264	USE1	ZW10	psi-mi:MI:0007(anti tag coimmunoprecipitation)
Q9NZ43	Q6NUQ1	USE1	RINT1	psi-mi:MI:0007(anti tag coimmunoprecipitation)
Q9NZ43	O43264	USE1	ZW10	psi-mi:MI:0096(pull down)
Q9NZ43	Q6NUQ1	USE1	RINT1	psi-mi:MI:0096(pull down)
Q9NZ43	Q6NUQ1	USE1	RINT1	psi-mi:MI:0096(pull down)
Q93009	Q02241	USP7	KIF23	psi-mi:MI:0007(anti tag coimmunoprecipitation)
Q9P2Y5	O43264	UVRAG	ZW10	psi-mi:MI:0006(anti bait coimmunoprecipitation)
Q9P2Y5	O43264	UVRAG	ZW10	psi-mi:MI:0006(anti bait coimmunoprecipitation)
Q9P2Y5	O43264	UVRAG	ZW10	psi-mi:MI:0006(anti bait coimmunoprecipitation)
Q9P2Y5	O43264	UVRAG	ZW10	psi-mi:MI:0006(anti bait coimmunoprecipitation)
Q9P2Y5	O43264	UVRAG	ZW10	psi-mi:MI:0006(anti bait coimmunoprecipitation)
Q9P2Y5	O43264	UVRAG	ZW10	psi-mi:MI:0006(anti bait coimmunoprecipitation)
Q9P2Y5	Q6NUQ1	UVRAG	RINT1	psi-mi:MI:0006(anti bait coimmunoprecipitation)
Q9P2Y5	Q6NUQ1	UVRAG	RINT1	psi-mi:MI:0006(anti bait coimmunoprecipitation)
Q9P2Y5	Q6NUQ1	UVRAG	RINT1	psi-mi:MI:0006(anti bait coimmunoprecipitation)
Q9P2Y5	Q6NUQ1	UVRAG	RINT1	psi-mi:MI:0006(anti bait coimmunoprecipitation)
Q9P2Y5	Q6NUQ1	UVRAG	RINT1	psi-mi:MI:0006(anti bait coimmunoprecipitation)
Q9P2Y5	Q6NUQ1	UVRAG	RINT1	psi-mi:MI:0006(anti bait coimmunoprecipitation)
Q9P2Y5	Q6NUQ1	UVRAG	RINT1	psi-mi:MI:0006(anti bait coimmunoprecipitation)
Q9P2Y5	O43264	UVRAG	ZW10	psi-mi:MI:0007(anti tag coimmunoprecipitation)
Q9P2Y5	O43264	UVRAG	ZW10	psi-mi:MI:0007(anti tag coimmunoprecipitation)
Q9P2Y5	O43264	UVRAG	ZW10	psi-mi:MI:0007(anti tag coimmunoprecipitation)
Q9P2Y5	Q6NUQ1	UVRAG	RINT1	psi-mi:MI:0007(anti tag coimmunoprecipitation)
Q9P2Y5	Q6NUQ1	UVRAG	RINT1	psi-mi:MI:0007(anti tag coimmunoprecipitation)
Q9P2Y5	Q6NUQ1	UVRAG	RINT1	psi-mi:MI:0007(anti tag coimmunoprecipitation)
Q9P2Y5	Q6NUQ1	UVRAG	RINT1	psi-mi:MI:0007(anti tag coimmunoprecipitation)
Q9P2Y5	Q6NUQ1	UVRAG	RINT1	psi-mi:MI:0007(anti tag coimmunoprecipitation)
Q9P2Y5	Q6NUQ1	UVRAG	RINT1	psi-mi:MI:0007(anti tag coimmunoprecipitation)
Q9P2Y5	Q6NUQ1	UVRAG	RINT1	psi-mi:MI:0096(pull down)
Q4G0F5	Q12840	VPS26B	KIF5A	psi-mi:MI:0007(anti tag coimmunoprecipitation)
O43379	Q02241	WDR62	KIF23	psi-mi:MI:0006(anti bait coimmunoprecipitation)
O43542	O43264	XRCC3	ZW10	psi-mi:MI:0007(anti tag coimmunoprecipitation)
P31946	Q02241	YWHAB	KIF23	psi-mi:MI:0019(coimmunoprecipitation)
Q04917	Q02241	YWHAH	KIF23	psi-mi:MI:0007(anti tag coimmunoprecipitation)
Q04917	Q02241	YWHAH	KIF23	psi-mi:MI:0676(tandem affinity purification)
P63104	Q02241	YWHAZ	KIF23	psi-mi:MI:0007(anti tag coimmunoprecipitation)
P63104	Q02241	YWHAZ	KIF23	psi-mi:MI:0096(pull down)
P63104	Q02241	YWHAZ	KIF23	psi-mi:MI:0096(pull down)
O43264	Q9H900	ZW10	ZWILCH	psi-mi:MI:0006(anti bait coimmunoprecipitation)
O43264	Q9H900	ZW10	ZWILCH	psi-mi:MI:0006(anti bait coimmunoprecipitation)
O43264	Q9P2Y5	ZW10	UVRAG	psi-mi:MI:0006(anti bait coimmunoprecipitation)
O43264	Q9P2Y5	ZW10	UVRAG	psi-mi:MI:0006(anti bait coimmunoprecipitation)
O43264	Q9P2Y5	ZW10	UVRAG	psi-mi:MI:0006(anti bait coimmunoprecipitation)
O43264	Q15714	ZW10	TSC22D1	psi-mi:MI:0006(anti bait coimmunoprecipitation)
O43264	Q9P2W9	ZW10	STX18	psi-mi:MI:0006(anti bait coimmunoprecipitation)
O43264	Q6NUQ1	ZW10	RINT1	psi-mi:MI:0006(anti bait coimmunoprecipitation)
O43264	Q6NUQ1	ZW10	RINT1	psi-mi:MI:0006(anti bait coimmunoprecipitation)
O43264	Q6NUQ1	ZW10	RINT1	psi-mi:MI:0006(anti bait coimmunoprecipitation)
O43264	Q6NUQ1	ZW10	RINT1	psi-mi:MI:0006(anti bait coimmunoprecipitation)
O43264	Q6NUQ1	ZW10	RINT1	psi-mi:MI:0006(anti bait coimmunoprecipitation)
O43264	Q6NUQ1	ZW10	RINT1	psi-mi:MI:0006(anti bait coimmunoprecipitation)
O43264	Q6NUQ1	ZW10	RINT1	psi-mi:MI:0006(anti bait coimmunoprecipitation)
O43264	Q6NUQ1	ZW10	RINT1	psi-mi:MI:0006(anti bait coimmunoprecipitation)
O43264	O75365	ZW10	PTP4A3	psi-mi:MI:0006(anti bait coimmunoprecipitation)
O43264	Q9Y5J5	ZW10	PHLDA3	psi-mi:MI:0006(anti bait coimmunoprecipitation)
O43264	A2RRP1	ZW10	NBAS	psi-mi:MI:0006(anti bait coimmunoprecipitation)
O43264	A2RRP1	ZW10	NBAS	psi-mi:MI:0006(anti bait coimmunoprecipitation)
O43264	A2RRP1	ZW10	NBAS	psi-mi:MI:0006(anti bait coimmunoprecipitation)
O43264	A2RRP1	ZW10	NBAS	psi-mi:MI:0006(anti bait coimmunoprecipitation)
O43264	P50748	ZW10	KNTC1	psi-mi:MI:0006(anti bait coimmunoprecipitation)
O43264	Q9Y2Q3	ZW10	GSTK1	psi-mi:MI:0006(anti bait coimmunoprecipitation)
O43264	P35606	ZW10	COPB2	psi-mi:MI:0006(anti bait coimmunoprecipitation)
O43264	P35606	ZW10	COPB2	psi-mi:MI:0006(anti bait coimmunoprecipitation)
O43264	Q9HAW0	ZW10	BRF2	psi-mi:MI:0006(anti bait coimmunoprecipitation)
O43264	O95229	ZW10	ZWINT	psi-mi:MI:0007(anti tag coimmunoprecipitation)
O43264	Q9H900	ZW10	ZWILCH	psi-mi:MI:0007(anti tag coimmunoprecipitation)
O43264	Q6NUQ1	ZW10	RINT1	psi-mi:MI:0007(anti tag coimmunoprecipitation)
O43264	Q6NUQ1	ZW10	RINT1	psi-mi:MI:0007(anti tag coimmunoprecipitation)
O43264	A2RRP1	ZW10	NBAS	psi-mi:MI:0007(anti tag coimmunoprecipitation)
O43264	P50748	ZW10	KNTC1	psi-mi:MI:0007(anti tag coimmunoprecipitation)
O43264	O95229	ZW10	ZWINT	psi-mi:MI:0096(pull down)
O43264	Q6NUQ1	ZW10	RINT1	psi-mi:MI:0096(pull down)
O43264	Q6NUQ1	ZW10	RINT1	psi-mi:MI:0096(pull down)
O43264	O14777	ZW10	NDC80	psi-mi:MI:0096(pull down)
O43264	Q9H900	ZW10	ZWILCH	psi-mi:MI:0676(tandem affinity purification)
O43264	Q6NUQ1	ZW10	RINT1	psi-mi:MI:0676(tandem affinity purification)
O43264	Q6NUQ1	ZW10	RINT1	psi-mi:MI:0676(tandem affinity purification)
O43264	P50748	ZW10	KNTC1	psi-mi:MI:0676(tandem affinity purification)
O43264	Q9UFG5	ZW10	C19orf25	psi-mi:MI:0676(tandem affinity purification)
O95229	O43264	ZWINT	ZW10	psi-mi:MI:0096(pull down)

## Sheet: Second_deg_network
UniProtA	UniProtB	GeneA	GeneB	Interaction detection method
Q9H3P7	Q9UBF8	ACBD3	PI4KB	psi-mi:MI:0007(anti tag coimmunoprecipitation)
Q9H3P7	Q9UBF8	ACBD3	PI4KB	psi-mi:MI:0007(anti tag coimmunoprecipitation)
P61163	P30480	ACTR1A	HLA-B	psi-mi:MI:0006(anti bait coimmunoprecipitation)
Q12904	P30480	AIMP1	HLA-B	psi-mi:MI:0006(anti bait coimmunoprecipitation)
O43488	P30480	AKR7A2	HLA-B	psi-mi:MI:0006(anti bait coimmunoprecipitation)
P31749	Q5S007	AKT1	LRRK2	psi-mi:MI:0096(pull down)
P31749	Q5S007	AKT1	LRRK2	psi-mi:MI:0424(protein kinase assay)
P31749	Q14457	AKT1	BECN1	psi-mi:MI:0007(anti tag coimmunoprecipitation)
Q9C0C7	Q14457	AMBRA1	BECN1	psi-mi:MI:0006(anti bait coimmunoprecipitation)
Q9C0C7	Q14457	AMBRA1	BECN1	psi-mi:MI:0006(anti bait coimmunoprecipitation)
P03950	P0DMV8	ANG	HSPA1A	psi-mi:MI:0006(anti bait coimmunoprecipitation)
P03950	P11142	ANG	HSPA8	psi-mi:MI:0006(anti bait coimmunoprecipitation)
P07355	P30480	ANXA2	HLA-B	psi-mi:MI:0006(anti bait coimmunoprecipitation)
P61966	P61026	AP1S1	RAB10	psi-mi:MI:0006(anti bait coimmunoprecipitation)
Q96CW1	P00533	AP2M1	EGFR	psi-mi:MI:0676(tandem affinity purification)
P05067	P11142	APP	HSPA8	psi-mi:MI:0006(anti bait coimmunoprecipitation)
P05067	P11142	APP	HSPA8	psi-mi:MI:0006(anti bait coimmunoprecipitation)
P62330	P30480	ARF6	HLA-B	psi-mi:MI:0006(anti bait coimmunoprecipitation)
Q8N6T3	Q5S007	ARFGAP1	LRRK2	psi-mi:MI:0007(anti tag coimmunoprecipitation)
Q8N6T3	Q5S007	ARFGAP1	LRRK2	psi-mi:MI:0424(protein kinase assay)
P40616	P30480	ARL1	HLA-B	psi-mi:MI:0006(anti bait coimmunoprecipitation)
P49407	P11142	ARRB1	HSPA8	psi-mi:MI:0007(anti tag coimmunoprecipitation)
P49407	P11142	ARRB1	HSPA8	psi-mi:MI:0007(anti tag coimmunoprecipitation)
P49407	P11142	ARRB1	HSPA8	psi-mi:MI:0007(anti tag coimmunoprecipitation)
P49407	P11142	ARRB1	HSPA8	psi-mi:MI:0007(anti tag coimmunoprecipitation)
P49407	Q9BXF6	ARRB1	RAB11FIP5	psi-mi:MI:0007(anti tag coimmunoprecipitation)
P32121	P11142	ARRB2	HSPA8	psi-mi:MI:0007(anti tag coimmunoprecipitation)
P32121	P11142	ARRB2	HSPA8	psi-mi:MI:0007(anti tag coimmunoprecipitation)
P32121	P11142	ARRB2	HSPA8	psi-mi:MI:0007(anti tag coimmunoprecipitation)
P32121	P11142	ARRB2	HSPA8	psi-mi:MI:0007(anti tag coimmunoprecipitation)
P32121	Q9BXF6	ARRB2	RAB11FIP5	psi-mi:MI:0007(anti tag coimmunoprecipitation)
P32121	Q9BXF6	ARRB2	RAB11FIP5	psi-mi:MI:0007(anti tag coimmunoprecipitation)
Q6ZNE5	Q8NEB9	ATG14	PIK3C3	psi-mi:MI:0006(anti bait coimmunoprecipitation)
Q6ZNE5	Q8NEB9	ATG14	PIK3C3	psi-mi:MI:0006(anti bait coimmunoprecipitation)
Q6ZNE5	Q8NEB9	ATG14	PIK3C3	psi-mi:MI:0006(anti bait coimmunoprecipitation)
Q6ZNE5	Q8NEB9	ATG14	PIK3C3	psi-mi:MI:0006(anti bait coimmunoprecipitation)
Q6ZNE5	Q8NEB9	ATG14	PIK3C3	psi-mi:MI:0007(anti tag coimmunoprecipitation)
Q6ZNE5	Q8NEB9	ATG14	PIK3C3	psi-mi:MI:0007(anti tag coimmunoprecipitation)
Q6ZNE5	Q8NEB9	ATG14	PIK3C3	psi-mi:MI:0007(anti tag coimmunoprecipitation)
Q6ZNE5	Q8NEB9	ATG14	PIK3C3	psi-mi:MI:0007(anti tag coimmunoprecipitation)
Q6ZNE5	Q8NEB9	ATG14	PIK3C3	psi-mi:MI:0007(anti tag coimmunoprecipitation)
Q6ZNE5	Q8NEB9	ATG14	PIK3C3	psi-mi:MI:0007(anti tag coimmunoprecipitation)
Q6ZNE5	Q8NEB9	ATG14	PIK3C3	psi-mi:MI:0007(anti tag coimmunoprecipitation)
Q6ZNE5	Q8NEB9	ATG14	PIK3C3	psi-mi:MI:0007(anti tag coimmunoprecipitation)
Q6ZNE5	Q8NEB9	ATG14	PIK3C3	psi-mi:MI:0007(anti tag coimmunoprecipitation)
Q6ZNE5	Q8NEB9	ATG14	PIK3C3	psi-mi:MI:0007(anti tag coimmunoprecipitation)
Q6ZNE5	Q8NEB9	ATG14	PIK3C3	psi-mi:MI:0007(anti tag coimmunoprecipitation)
Q6ZNE5	Q8NEB9	ATG14	PIK3C3	psi-mi:MI:0007(anti tag coimmunoprecipitation)
Q6ZNE5	Q8NEB9	ATG14	PIK3C3	psi-mi:MI:0096(pull down)
Q6ZNE5	Q8NEB9	ATG14	PIK3C3	psi-mi:MI:0096(pull down)
Q6ZNE5	Q8NEB9	ATG14	PIK3C3	psi-mi:MI:0841(phosphotransferase assay)
Q6ZNE5	Q8NEB9	ATG14	PIK3C3	psi-mi:MI:0841(phosphotransferase assay)
Q6ZNE5	Q6ZNE5	ATG14	ATG14	psi-mi:MI:0007(anti tag coimmunoprecipitation)
Q6ZNE5	Q6ZNE5	ATG14	ATG14	psi-mi:MI:0007(anti tag coimmunoprecipitation)
Q6ZNE5	Q99570	ATG14	PIK3R4	psi-mi:MI:0007(anti tag coimmunoprecipitation)
Q6ZNE5	Q99570	ATG14	PIK3R4	psi-mi:MI:0007(anti tag coimmunoprecipitation)
Q6ZNE5	Q99570	ATG14	PIK3R4	psi-mi:MI:0007(anti tag coimmunoprecipitation)
Q6ZNE5	Q99570	ATG14	PIK3R4	psi-mi:MI:0096(pull down)
Q6ZNE5	Q99570	ATG14	PIK3R4	psi-mi:MI:0841(phosphotransferase assay)
Q6ZNE5	Q96F24	ATG14	NRBF2	psi-mi:MI:0007(anti tag coimmunoprecipitation)
Q6ZNE5	Q14457	ATG14	BECN1	psi-mi:MI:0006(anti bait coimmunoprecipitation)
Q6ZNE5	Q14457	ATG14	BECN1	psi-mi:MI:0006(anti bait coimmunoprecipitation)
Q6ZNE5	Q14457	ATG14	BECN1	psi-mi:MI:0006(anti bait coimmunoprecipitation)
Q6ZNE5	Q14457	ATG14	BECN1	psi-mi:MI:0006(anti bait coimmunoprecipitation)
Q6ZNE5	Q14457	ATG14	BECN1	psi-mi:MI:0006(anti bait coimmunoprecipitation)
Q6ZNE5	Q14457	ATG14	BECN1	psi-mi:MI:0006(anti bait coimmunoprecipitation)
Q6ZNE5	Q14457	ATG14	BECN1	psi-mi:MI:0006(anti bait coimmunoprecipitation)
Q6ZNE5	Q14457	ATG14	BECN1	psi-mi:MI:0006(anti bait coimmunoprecipitation)
Q6ZNE5	Q14457	ATG14	BECN1	psi-mi:MI:0007(anti tag coimmunoprecipitation)
Q6ZNE5	Q14457	ATG14	BECN1	psi-mi:MI:0007(anti tag coimmunoprecipitation)
Q6ZNE5	Q14457	ATG14	BECN1	psi-mi:MI:0007(anti tag coimmunoprecipitation)
Q6ZNE5	Q14457	ATG14	BECN1	psi-mi:MI:0007(anti tag coimmunoprecipitation)
Q6ZNE5	Q14457	ATG14	BECN1	psi-mi:MI:0007(anti tag coimmunoprecipitation)
Q6ZNE5	Q14457	ATG14	BECN1	psi-mi:MI:0007(anti tag coimmunoprecipitation)
Q6ZNE5	Q14457	ATG14	BECN1	psi-mi:MI:0007(anti tag coimmunoprecipitation)
Q6ZNE5	Q14457	ATG14	BECN1	psi-mi:MI:0007(anti tag coimmunoprecipitation)
Q6ZNE5	Q14457	ATG14	BECN1	psi-mi:MI:0007(anti tag coimmunoprecipitation)
Q6ZNE5	Q14457	ATG14	BECN1	psi-mi:MI:0007(anti tag coimmunoprecipitation)
Q6ZNE5	Q14457	ATG14	BECN1	psi-mi:MI:0007(anti tag coimmunoprecipitation)
Q6ZNE5	Q14457	ATG14	BECN1	psi-mi:MI:0007(anti tag coimmunoprecipitation)
Q6ZNE5	Q14457	ATG14	BECN1	psi-mi:MI:0007(anti tag coimmunoprecipitation)
Q6ZNE5	Q14457	ATG14	BECN1	psi-mi:MI:0007(anti tag coimmunoprecipitation)
Q6ZNE5	Q14457	ATG14	BECN1	psi-mi:MI:0096(pull down)
Q6ZNE5	Q14457	ATG14	BECN1	psi-mi:MI:0096(pull down)
Q6ZNE5	Q14457	ATG14	BECN1	psi-mi:MI:0096(pull down)
Q6ZNE5	Q14457	ATG14	BECN1	psi-mi:MI:0096(pull down)
Q6ZNE5	Q14457	ATG14	BECN1	psi-mi:MI:0096(pull down)
Q6ZNE5	Q14457	ATG14	BECN1	psi-mi:MI:0096(pull down)
Q6ZNE5	Q14457	ATG14	BECN1	psi-mi:MI:0096(pull down)
Q6ZNE5	Q14457	ATG14	BECN1	psi-mi:MI:0096(pull down)
Q6ZNE5	Q14457	ATG14	BECN1	psi-mi:MI:0841(phosphotransferase assay)
Q6ZNE5	Q14457	ATG14	BECN1	psi-mi:MI:0841(phosphotransferase assay)
Q6ZNE5	Q14964	ATG14	RAB39A	psi-mi:MI:0007(anti tag coimmunoprecipitation)
Q6ZNE5	Q14964	ATG14	RAB39A	psi-mi:MI:0007(anti tag coimmunoprecipitation)
O14965	P00533	AURKA	EGFR	psi-mi:MI:0007(anti tag coimmunoprecipitation)
P51572	P13569	BCAP31	CFTR	psi-mi:MI:0006(anti bait coimmunoprecipitation)
P51572	P30480	BCAP31	HLA-B	psi-mi:MI:0006(anti bait coimmunoprecipitation)
Q07817	Q14457	BCL2L1	BECN1	psi-mi:MI:0007(anti tag coimmunoprecipitation)
Q07817	Q14457	BCL2L1	BECN1	psi-mi:MI:0007(anti tag coimmunoprecipitation)
Q07817	Q14457	BCL2L1	BECN1	psi-mi:MI:0007(anti tag coimmunoprecipitation)
Q14457	P09429	BECN1	HMGB1	psi-mi:MI:0006(anti bait coimmunoprecipitation)
Q14457	P09429	BECN1	HMGB1	psi-mi:MI:0006(anti bait coimmunoprecipitation)
Q14457	P00533	BECN1	EGFR	psi-mi:MI:0006(anti bait coimmunoprecipitation)
Q14457	P00533	BECN1	EGFR	psi-mi:MI:0006(anti bait coimmunoprecipitation)
Q14457	P00533	BECN1	EGFR	psi-mi:MI:0006(anti bait coimmunoprecipitation)
Q14457	P00533	BECN1	EGFR	psi-mi:MI:0006(anti bait coimmunoprecipitation)
Q14457	P00533	BECN1	EGFR	psi-mi:MI:0007(anti tag coimmunoprecipitation)
Q14457	P00533	BECN1	EGFR	psi-mi:MI:0007(anti tag coimmunoprecipitation)
Q14457	Q9H1Y0	BECN1	ATG5	psi-mi:MI:0007(anti tag coimmunoprecipitation)
Q14457	O94817	BECN1	ATG12	psi-mi:MI:0007(anti tag coimmunoprecipitation)
Q14457	Q8NEB9	BECN1	PIK3C3	psi-mi:MI:0006(anti bait coimmunoprecipitation)
Q14457	Q8NEB9	BECN1	PIK3C3	psi-mi:MI:0006(anti bait coimmunoprecipitation)
Q14457	Q8NEB9	BECN1	PIK3C3	psi-mi:MI:0006(anti bait coimmunoprecipitation)
Q14457	Q8NEB9	BECN1	PIK3C3	psi-mi:MI:0006(anti bait coimmunoprecipitation)
Q14457	Q8NEB9	BECN1	PIK3C3	psi-mi:MI:0006(anti bait coimmunoprecipitation)
Q14457	Q8NEB9	BECN1	PIK3C3	psi-mi:MI:0006(anti bait coimmunoprecipitation)
Q14457	Q8NEB9	BECN1	PIK3C3	psi-mi:MI:0006(anti bait coimmunoprecipitation)
Q14457	Q8NEB9	BECN1	PIK3C3	psi-mi:MI:0006(anti bait coimmunoprecipitation)
Q14457	Q8NEB9	BECN1	PIK3C3	psi-mi:MI:0006(anti bait coimmunoprecipitation)
Q14457	Q8NEB9	BECN1	PIK3C3	psi-mi:MI:0006(anti bait coimmunoprecipitation)
Q14457	Q8NEB9	BECN1	PIK3C3	psi-mi:MI:0006(anti bait coimmunoprecipitation)
Q14457	Q8NEB9	BECN1	PIK3C3	psi-mi:MI:0006(anti bait coimmunoprecipitation)
Q14457	Q8NEB9	BECN1	PIK3C3	psi-mi:MI:0006(anti bait coimmunoprecipitation)
Q14457	Q8NEB9	BECN1	PIK3C3	psi-mi:MI:0006(anti bait coimmunoprecipitation)
Q14457	Q8NEB9	BECN1	PIK3C3	psi-mi:MI:0007(anti tag coimmunoprecipitation)
Q14457	Q8NEB9	BECN1	PIK3C3	psi-mi:MI:0007(anti tag coimmunoprecipitation)
Q14457	Q8NEB9	BECN1	PIK3C3	psi-mi:MI:0007(anti tag coimmunoprecipitation)
Q14457	Q8NEB9	BECN1	PIK3C3	psi-mi:MI:0007(anti tag coimmunoprecipitation)
Q14457	Q8NEB9	BECN1	PIK3C3	psi-mi:MI:0007(anti tag coimmunoprecipitation)
Q14457	Q8NEB9	BECN1	PIK3C3	psi-mi:MI:0007(anti tag coimmunoprecipitation)
Q14457	Q8NEB9	BECN1	PIK3C3	psi-mi:MI:0007(anti tag coimmunoprecipitation)
Q14457	Q8NEB9	BECN1	PIK3C3	psi-mi:MI:0007(anti tag coimmunoprecipitation)
Q14457	Q8NEB9	BECN1	PIK3C3	psi-mi:MI:0007(anti tag coimmunoprecipitation)
Q14457	Q8NEB9	BECN1	PIK3C3	psi-mi:MI:0007(anti tag coimmunoprecipitation)
Q14457	Q8NEB9	BECN1	PIK3C3	psi-mi:MI:0007(anti tag coimmunoprecipitation)
Q14457	Q8NEB9	BECN1	PIK3C3	psi-mi:MI:0007(anti tag coimmunoprecipitation)
Q14457	Q8NEB9	BECN1	PIK3C3	psi-mi:MI:0007(anti tag coimmunoprecipitation)
Q14457	Q8NEB9	BECN1	PIK3C3	psi-mi:MI:0007(anti tag coimmunoprecipitation)
Q14457	Q8NEB9	BECN1	PIK3C3	psi-mi:MI:0007(anti tag coimmunoprecipitation)
Q14457	Q8NEB9	BECN1	PIK3C3	psi-mi:MI:0007(anti tag coimmunoprecipitation)
Q14457	Q8NEB9	BECN1	PIK3C3	psi-mi:MI:0007(anti tag coimmunoprecipitation)
Q14457	Q8NEB9	BECN1	PIK3C3	psi-mi:MI:0007(anti tag coimmunoprecipitation)
Q14457	Q8NEB9	BECN1	PIK3C3	psi-mi:MI:0007(anti tag coimmunoprecipitation)
Q14457	Q8NEB9	BECN1	PIK3C3	psi-mi:MI:0007(anti tag coimmunoprecipitation)
Q14457	Q8NEB9	BECN1	PIK3C3	psi-mi:MI:0007(anti tag coimmunoprecipitation)
Q14457	Q8NEB9	BECN1	PIK3C3	psi-mi:MI:0007(anti tag coimmunoprecipitation)
Q14457	Q8NEB9	BECN1	PIK3C3	psi-mi:MI:0007(anti tag coimmunoprecipitation)
Q14457	Q8NEB9	BECN1	PIK3C3	psi-mi:MI:0007(anti tag coimmunoprecipitation)
Q14457	Q8NEB9	BECN1	PIK3C3	psi-mi:MI:0007(anti tag coimmunoprecipitation)
Q14457	Q8NEB9	BECN1	PIK3C3	psi-mi:MI:0007(anti tag coimmunoprecipitation)
Q14457	Q8NEB9	BECN1	PIK3C3	psi-mi:MI:0007(anti tag coimmunoprecipitation)
Q14457	Q8NEB9	BECN1	PIK3C3	psi-mi:MI:0007(anti tag coimmunoprecipitation)
Q14457	Q6ZNE5	BECN1	ATG14	psi-mi:MI:0006(anti bait coimmunoprecipitation)
Q14457	Q6ZNE5	BECN1	ATG14	psi-mi:MI:0006(anti bait coimmunoprecipitation)
Q14457	Q6ZNE5	BECN1	ATG14	psi-mi:MI:0006(anti bait coimmunoprecipitation)
Q14457	Q6ZNE5	BECN1	ATG14	psi-mi:MI:0006(anti bait coimmunoprecipitation)
Q14457	Q6ZNE5	BECN1	ATG14	psi-mi:MI:0006(anti bait coimmunoprecipitation)
Q14457	Q6ZNE5	BECN1	ATG14	psi-mi:MI:0006(anti bait coimmunoprecipitation)
Q14457	Q6ZNE5	BECN1	ATG14	psi-mi:MI:0006(anti bait coimmunoprecipitation)
Q14457	Q6ZNE5	BECN1	ATG14	psi-mi:MI:0006(anti bait coimmunoprecipitation)
Q14457	Q6ZNE5	BECN1	ATG14	psi-mi:MI:0006(anti bait coimmunoprecipitation)
Q14457	Q6ZNE5	BECN1	ATG14	psi-mi:MI:0006(anti bait coimmunoprecipitation)
Q14457	Q6ZNE5	BECN1	ATG14	psi-mi:MI:0007(anti tag coimmunoprecipitation)
Q14457	Q6ZNE5	BECN1	ATG14	psi-mi:MI:0007(anti tag coimmunoprecipitation)
Q14457	Q6ZNE5	BECN1	ATG14	psi-mi:MI:0007(anti tag coimmunoprecipitation)
Q14457	Q6ZNE5	BECN1	ATG14	psi-mi:MI:0007(anti tag coimmunoprecipitation)
Q14457	Q6ZNE5	BECN1	ATG14	psi-mi:MI:0007(anti tag coimmunoprecipitation)
Q14457	Q6ZNE5	BECN1	ATG14	psi-mi:MI:0007(anti tag coimmunoprecipitation)
Q14457	Q6ZNE5	BECN1	ATG14	psi-mi:MI:0007(anti tag coimmunoprecipitation)
Q14457	Q6ZNE5	BECN1	ATG14	psi-mi:MI:0007(anti tag coimmunoprecipitation)
Q14457	Q6ZNE5	BECN1	ATG14	psi-mi:MI:0007(anti tag coimmunoprecipitation)
Q14457	Q6ZNE5	BECN1	ATG14	psi-mi:MI:0007(anti tag coimmunoprecipitation)
Q14457	Q6ZNE5	BECN1	ATG14	psi-mi:MI:0007(anti tag coimmunoprecipitation)
Q14457	Q6ZNE5	BECN1	ATG14	psi-mi:MI:0007(anti tag coimmunoprecipitation)
Q14457	Q6ZNE5	BECN1	ATG14	psi-mi:MI:0007(anti tag coimmunoprecipitation)
Q14457	Q6ZNE5	BECN1	ATG14	psi-mi:MI:0007(anti tag coimmunoprecipitation)
Q14457	Q6ZNE5	BECN1	ATG14	psi-mi:MI:0007(anti tag coimmunoprecipitation)
Q14457	Q6ZNE5	BECN1	ATG14	psi-mi:MI:0007(anti tag coimmunoprecipitation)
Q14457	Q6ZNE5	BECN1	ATG14	psi-mi:MI:0007(anti tag coimmunoprecipitation)
Q14457	Q6ZNE5	BECN1	ATG14	psi-mi:MI:0007(anti tag coimmunoprecipitation)
Q14457	Q6ZNE5	BECN1	ATG14	psi-mi:MI:0007(anti tag coimmunoprecipitation)
Q14457	Q6ZNE5	BECN1	ATG14	psi-mi:MI:0007(anti tag coimmunoprecipitation)
Q14457	Q6ZNE5	BECN1	ATG14	psi-mi:MI:0007(anti tag coimmunoprecipitation)
Q14457	Q6ZNE5	BECN1	ATG14	psi-mi:MI:0007(anti tag coimmunoprecipitation)
Q14457	Q6ZNE5	BECN1	ATG14	psi-mi:MI:0096(pull down)
Q14457	Q6ZNE5	BECN1	ATG14	psi-mi:MI:0096(pull down)
Q14457	Q6ZNE5	BECN1	ATG14	psi-mi:MI:0096(pull down)
Q14457	Q6ZNE5	BECN1	ATG14	psi-mi:MI:0096(pull down)
Q14457	P42858	BECN1	HTT	psi-mi:MI:0006(anti bait coimmunoprecipitation)
Q14457	P42858	BECN1	HTT	psi-mi:MI:0006(anti bait coimmunoprecipitation)
Q14457	P42858	BECN1	HTT	psi-mi:MI:0006(anti bait coimmunoprecipitation)
Q14457	P42858	BECN1	HTT	psi-mi:MI:0006(anti bait coimmunoprecipitation)
Q14457	Q9C0C7	BECN1	AMBRA1	psi-mi:MI:0006(anti bait coimmunoprecipitation)
Q14457	Q9C0C7	BECN1	AMBRA1	psi-mi:MI:0006(anti bait coimmunoprecipitation)
Q14457	Q9C0C7	BECN1	AMBRA1	psi-mi:MI:0006(anti bait coimmunoprecipitation)
Q14457	Q9C0C7	BECN1	AMBRA1	psi-mi:MI:0007(anti tag coimmunoprecipitation)
Q14457	Q9C0C7	BECN1	AMBRA1	psi-mi:MI:0007(anti tag coimmunoprecipitation)
Q14457	Q9C0C7	BECN1	AMBRA1	psi-mi:MI:0007(anti tag coimmunoprecipitation)
Q14457	Q9C0C7	BECN1	AMBRA1	psi-mi:MI:0007(anti tag coimmunoprecipitation)
Q14457	Q99570	BECN1	PIK3R4	psi-mi:MI:0007(anti tag coimmunoprecipitation)
Q14457	Q99570	BECN1	PIK3R4	psi-mi:MI:0007(anti tag coimmunoprecipitation)
Q14457	Q99570	BECN1	PIK3R4	psi-mi:MI:0007(anti tag coimmunoprecipitation)
Q14457	Q99570	BECN1	PIK3R4	psi-mi:MI:0007(anti tag coimmunoprecipitation)
Q14457	Q99570	BECN1	PIK3R4	psi-mi:MI:0007(anti tag coimmunoprecipitation)
Q14457	Q96F24	BECN1	NRBF2	psi-mi:MI:0007(anti tag coimmunoprecipitation)
Q14457	Q96F24	BECN1	NRBF2	psi-mi:MI:0007(anti tag coimmunoprecipitation)
Q14457	Q96F24	BECN1	NRBF2	psi-mi:MI:0007(anti tag coimmunoprecipitation)
Q14457	Q96F24	BECN1	NRBF2	psi-mi:MI:0007(anti tag coimmunoprecipitation)
Q14457	Q14457	BECN1	BECN1	psi-mi:MI:0007(anti tag coimmunoprecipitation)
Q14457	Q14457	BECN1	BECN1	psi-mi:MI:0007(anti tag coimmunoprecipitation)
Q14457	Q14457	BECN1	BECN1	psi-mi:MI:0007(anti tag coimmunoprecipitation)
Q14457	Q14457	BECN1	BECN1	psi-mi:MI:0007(anti tag coimmunoprecipitation)
Q14457	Q14457	BECN1	BECN1	psi-mi:MI:0007(anti tag coimmunoprecipitation)
Q14457	Q14457	BECN1	BECN1	psi-mi:MI:0007(anti tag coimmunoprecipitation)
Q14457	Q14457	BECN1	BECN1	psi-mi:MI:0007(anti tag coimmunoprecipitation)
Q14457	Q14457	BECN1	BECN1	psi-mi:MI:0007(anti tag coimmunoprecipitation)
Q14457	Q5MNZ9	BECN1	WIPI1	psi-mi:MI:0007(anti tag coimmunoprecipitation)
Q14457	Q9Y371	BECN1	SH3GLB1	psi-mi:MI:0007(anti tag coimmunoprecipitation)
Q14457	Q7Z6L1	BECN1	TECPR1	psi-mi:MI:0007(anti tag coimmunoprecipitation)
Q14457	Q96GC9	BECN1	VMP1	psi-mi:MI:0006(anti bait coimmunoprecipitation)
Q14457	Q96GC9	BECN1	VMP1	psi-mi:MI:0007(anti tag coimmunoprecipitation)
Q14457	P60660	BECN1	MYL6	psi-mi:MI:0007(anti tag coimmunoprecipitation)
Q14457	P08670	BECN1	VIM	psi-mi:MI:0007(anti tag coimmunoprecipitation)
Q14457	Q9P2Y5	BECN1	UVRAG	psi-mi:MI:0006(anti bait coimmunoprecipitation)
Q14457	Q9P2Y5	BECN1	UVRAG	psi-mi:MI:0006(anti bait coimmunoprecipitation)
Q14457	Q9P2Y5	BECN1	UVRAG	psi-mi:MI:0006(anti bait coimmunoprecipitation)
Q14457	Q9P2Y5	BECN1	UVRAG	psi-mi:MI:0006(anti bait coimmunoprecipitation)
Q14457	Q9P2Y5	BECN1	UVRAG	psi-mi:MI:0006(anti bait coimmunoprecipitation)
Q14457	Q9P2Y5	BECN1	UVRAG	psi-mi:MI:0006(anti bait coimmunoprecipitation)
Q14457	Q9P2Y5	BECN1	UVRAG	psi-mi:MI:0006(anti bait coimmunoprecipitation)
Q14457	Q9P2Y5	BECN1	UVRAG	psi-mi:MI:0006(anti bait coimmunoprecipitation)
Q14457	Q9P2Y5	BECN1	UVRAG	psi-mi:MI:0007(anti tag coimmunoprecipitation)
Q14457	Q9P2Y5	BECN1	UVRAG	psi-mi:MI:0007(anti tag coimmunoprecipitation)
Q14457	Q9P2Y5	BECN1	UVRAG	psi-mi:MI:0007(anti tag coimmunoprecipitation)
Q14457	Q9P2Y5	BECN1	UVRAG	psi-mi:MI:0007(anti tag coimmunoprecipitation)
Q14457	Q9P2Y5	BECN1	UVRAG	psi-mi:MI:0007(anti tag coimmunoprecipitation)
Q14457	Q9P2Y5	BECN1	UVRAG	psi-mi:MI:0007(anti tag coimmunoprecipitation)
Q14457	Q9P2Y5	BECN1	UVRAG	psi-mi:MI:0007(anti tag coimmunoprecipitation)
Q14457	Q9P2Y5	BECN1	UVRAG	psi-mi:MI:0007(anti tag coimmunoprecipitation)
Q14457	Q9P2Y5	BECN1	UVRAG	psi-mi:MI:0007(anti tag coimmunoprecipitation)
Q14457	Q9P2Y5	BECN1	UVRAG	psi-mi:MI:0007(anti tag coimmunoprecipitation)
Q14457	Q9P2Y5	BECN1	UVRAG	psi-mi:MI:0007(anti tag coimmunoprecipitation)
Q14457	Q9P2Y5	BECN1	UVRAG	psi-mi:MI:0007(anti tag coimmunoprecipitation)
Q14457	Q9P2Y5	BECN1	UVRAG	psi-mi:MI:0007(anti tag coimmunoprecipitation)
Q14457	Q9P2Y5	BECN1	UVRAG	psi-mi:MI:0007(anti tag coimmunoprecipitation)
Q14457	Q9P2Y5	BECN1	UVRAG	psi-mi:MI:0007(anti tag coimmunoprecipitation)
Q14457	Q9P2Y5	BECN1	UVRAG	psi-mi:MI:0007(anti tag coimmunoprecipitation)
Q14457	Q9P2Y5	BECN1	UVRAG	psi-mi:MI:0096(pull down)
Q14457	Q9P2Y5	BECN1	UVRAG	psi-mi:MI:0096(pull down)
Q14457	Q9P0N9	BECN1	TBC1D7	psi-mi:MI:0007(anti tag coimmunoprecipitation)
Q14457	P08709	BECN1	F7	psi-mi:MI:0007(anti tag coimmunoprecipitation)
Q14457	O95229	BECN1	ZWINT	psi-mi:MI:0007(anti tag coimmunoprecipitation)
Q14457	O95229	BECN1	ZWINT	psi-mi:MI:0007(anti tag coimmunoprecipitation)
Q14457	Q9H3D4	BECN1	TP63	psi-mi:MI:0007(anti tag coimmunoprecipitation)
Q14457	Q96DA2	BECN1	RAB39B	psi-mi:MI:0007(anti tag coimmunoprecipitation)
Q14457	P46459	BECN1	NSF	psi-mi:MI:0007(anti tag coimmunoprecipitation)
Q14457	Q14964	BECN1	RAB39A	psi-mi:MI:0007(anti tag coimmunoprecipitation)
Q14457	Q14964	BECN1	RAB39A	psi-mi:MI:0007(anti tag coimmunoprecipitation)
O15155	P0DMV8	BET1	HSPA1A	psi-mi:MI:0096(pull down)
O15155	Q8WVM8	BET1	SCFD1	psi-mi:MI:0096(pull down)
O15155	Q13190	BET1	STX5	psi-mi:MI:0096(pull down)
O43683	O95229	BUB1	ZWINT	psi-mi:MI:0676(tandem affinity purification)
P0DP25	P30480	CALM3	HLA-B	psi-mi:MI:0006(anti bait coimmunoprecipitation)
P07384	Q8WTW3	CAPN1	COG1	psi-mi:MI:0007(anti tag coimmunoprecipitation)
P07384	Q8WTW3	CAPN1	COG1	psi-mi:MI:0007(anti tag coimmunoprecipitation)
P22681	P00533	CBL	EGFR	psi-mi:MI:0006(anti bait coimmunoprecipitation)
P22681	P00533	CBL	EGFR	psi-mi:MI:0006(anti bait coimmunoprecipitation)
P22681	P00533	CBL	EGFR	psi-mi:MI:0006(anti bait coimmunoprecipitation)
P22681	P00533	CBL	EGFR	psi-mi:MI:0006(anti bait coimmunoprecipitation)
P22681	P00533	CBL	EGFR	psi-mi:MI:0007(anti tag coimmunoprecipitation)
P22681	P00533	CBL	EGFR	psi-mi:MI:0007(anti tag coimmunoprecipitation)
P22681	P00533	CBL	EGFR	psi-mi:MI:0096(pull down)
P22681	P00533	CBL	EGFR	psi-mi:MI:0096(pull down)
P16152	P30480	CBR1	HLA-B	psi-mi:MI:0006(anti bait coimmunoprecipitation)
P60033	P00533	CD81	EGFR	psi-mi:MI:0006(anti bait coimmunoprecipitation)
P60033	P00533	CD81	EGFR	psi-mi:MI:0006(anti bait coimmunoprecipitation)
P60033	P00533	CD81	EGFR	psi-mi:MI:0006(anti bait coimmunoprecipitation)
P60033	P00533	CD81	EGFR	psi-mi:MI:0007(anti tag coimmunoprecipitation)
P60033	P30480	CD81	HLA-B	psi-mi:MI:0006(anti bait coimmunoprecipitation)
P60953	Q5S007	CDC42	LRRK2	psi-mi:MI:0007(anti tag coimmunoprecipitation)
P13569	Q14254	CFTR	FLOT2	psi-mi:MI:0006(anti bait coimmunoprecipitation)
P13569	P17987	CFTR	TCP1	psi-mi:MI:0006(anti bait coimmunoprecipitation)
P13569	P20339	CFTR	RAB5A	psi-mi:MI:0006(anti bait coimmunoprecipitation)
P13569	P20339	CFTR	RAB5A	psi-mi:MI:0006(anti bait coimmunoprecipitation)
P13569	P12830	CFTR	CDH1	psi-mi:MI:0006(anti bait coimmunoprecipitation)
P13569	P12830	CFTR	CDH1	psi-mi:MI:0006(anti bait coimmunoprecipitation)
P13569	O14745	CFTR	SLC9A3R1	psi-mi:MI:0006(anti bait coimmunoprecipitation)
P13569	O14745	CFTR	SLC9A3R1	psi-mi:MI:0096(pull down)
P13569	O14745	CFTR	SLC9A3R1	psi-mi:MI:0107(surface plasmon resonance)
P13569	P60709	CFTR	ACTB	psi-mi:MI:0006(anti bait coimmunoprecipitation)
P13569	P60709	CFTR	ACTB	psi-mi:MI:0006(anti bait coimmunoprecipitation)
P13569	O00165	CFTR	HAX1	psi-mi:MI:0006(anti bait coimmunoprecipitation)
P13569	P13987	CFTR	CD59	psi-mi:MI:0006(anti bait coimmunoprecipitation)
P13569	P16615	CFTR	ATP2A2	psi-mi:MI:0006(anti bait coimmunoprecipitation)
P13569	P40145	CFTR	ADCY8	psi-mi:MI:0006(anti bait coimmunoprecipitation)
P13569	P13569	CFTR	CFTR	psi-mi:MI:0007(anti tag coimmunoprecipitation)
P13569	P13569	CFTR	CFTR	psi-mi:MI:0007(anti tag coimmunoprecipitation)
P13569	Q9H3R2	CFTR	MUC13	psi-mi:MI:0006(anti bait coimmunoprecipitation)
P13569	P51149	CFTR	RAB7A	psi-mi:MI:0006(anti bait coimmunoprecipitation)
P13569	P62491	CFTR	RAB11A	psi-mi:MI:0006(anti bait coimmunoprecipitation)
P13569	P62491	CFTR	RAB11A	psi-mi:MI:0006(anti bait coimmunoprecipitation)
P13569	P28799	CFTR	GRN	psi-mi:MI:0006(anti bait coimmunoprecipitation)
P13569	Q12929	CFTR	EPS8	psi-mi:MI:0006(anti bait coimmunoprecipitation)
P13569	Q92736	CFTR	RYR2	psi-mi:MI:0006(anti bait coimmunoprecipitation)
P13569	P04899	CFTR	GNAI2	psi-mi:MI:0006(anti bait coimmunoprecipitation)
P13569	Q9HD26	CFTR	GOPC	psi-mi:MI:0096(pull down)
P13569	P08670	CFTR	VIM	psi-mi:MI:0006(anti bait coimmunoprecipitation)
P13569	P08670	CFTR	VIM	psi-mi:MI:0006(anti bait coimmunoprecipitation)
P13569	P10809	CFTR	HSPD1	psi-mi:MI:0006(anti bait coimmunoprecipitation)
P13569	P10809	CFTR	HSPD1	psi-mi:MI:0006(anti bait coimmunoprecipitation)
P13569	P11021	CFTR	HSPA5	psi-mi:MI:0006(anti bait coimmunoprecipitation)
P13569	P11021	CFTR	HSPA5	psi-mi:MI:0006(anti bait coimmunoprecipitation)
P13569	P11021	CFTR	HSPA5	psi-mi:MI:0006(anti bait coimmunoprecipitation)
P13569	Q10567	CFTR	AP1B1	psi-mi:MI:0006(anti bait coimmunoprecipitation)
P13569	P09496	CFTR	CLTA	psi-mi:MI:0006(anti bait coimmunoprecipitation)
P13569	P53675	CFTR	CLTCL1	psi-mi:MI:0006(anti bait coimmunoprecipitation)
P13569	P98082	CFTR	DAB2	psi-mi:MI:0006(anti bait coimmunoprecipitation)
P13569	Q9Y5X1	CFTR	SNX9	psi-mi:MI:0006(anti bait coimmunoprecipitation)
P13569	P51572	CFTR	BCAP31	psi-mi:MI:0006(anti bait coimmunoprecipitation)
P13569	Q14677	CFTR	CLINT1	psi-mi:MI:0006(anti bait coimmunoprecipitation)
P13569	Q14677	CFTR	CLINT1	psi-mi:MI:0006(anti bait coimmunoprecipitation)
P13569	Q02817	CFTR	MUC2	psi-mi:MI:0006(anti bait coimmunoprecipitation)
P13569	P53618	CFTR	COPB1	psi-mi:MI:0006(anti bait coimmunoprecipitation)
P13569	P53618	CFTR	COPB1	psi-mi:MI:0006(anti bait coimmunoprecipitation)
P13569	O75340	CFTR	PDCD6	psi-mi:MI:0006(anti bait coimmunoprecipitation)
P13569	P0CG47	CFTR	UBB	psi-mi:MI:0006(anti bait coimmunoprecipitation)
P13569	Q92734	CFTR	TFG	psi-mi:MI:0006(anti bait coimmunoprecipitation)
P13569	Q92734	CFTR	TFG	psi-mi:MI:0006(anti bait coimmunoprecipitation)
P13569	P22061	CFTR	PCMT1	psi-mi:MI:0006(anti bait coimmunoprecipitation)
P13569	P22061	CFTR	PCMT1	psi-mi:MI:0006(anti bait coimmunoprecipitation)
P13569	P22061	CFTR	PCMT1	psi-mi:MI:0006(anti bait coimmunoprecipitation)
P13569	O76024	CFTR	WFS1	psi-mi:MI:0006(anti bait coimmunoprecipitation)
P13569	Q92673	CFTR	SORL1	psi-mi:MI:0006(anti bait coimmunoprecipitation)
P13569	O43852	CFTR	CALU	psi-mi:MI:0006(anti bait coimmunoprecipitation)
P13569	Q6UX72	CFTR	B3GNT9	psi-mi:MI:0006(anti bait coimmunoprecipitation)
P13569	Q9BTV4	CFTR	TMEM43	psi-mi:MI:0006(anti bait coimmunoprecipitation)
P13569	Q9BTV4	CFTR	TMEM43	psi-mi:MI:0006(anti bait coimmunoprecipitation)
P13569	Q9H8Y8	CFTR	GORASP2	psi-mi:MI:0096(pull down)
P13569	O14939	CFTR	PLD2	psi-mi:MI:0006(anti bait coimmunoprecipitation)
P13569	O15554	CFTR	KCNN4	psi-mi:MI:0006(anti bait coimmunoprecipitation)
P13569	O15554	CFTR	KCNN4	psi-mi:MI:0006(anti bait coimmunoprecipitation)
Q14677	Q9H0R8	CLINT1	GABARAPL1	psi-mi:MI:0096(pull down)
P09497	O14976	CLTB	GAK	psi-mi:MI:0007(anti tag coimmunoprecipitation)
Q00610	P0DMV8	CLTC	HSPA1A	psi-mi:MI:0007(anti tag coimmunoprecipitation)
Q00610	Q01968	CLTC	OCRL	psi-mi:MI:0007(anti tag coimmunoprecipitation)
Q00610	Q01968	CLTC	OCRL	psi-mi:MI:0007(anti tag coimmunoprecipitation)
Q00610	Q01968	CLTC	OCRL	psi-mi:MI:0096(pull down)
Q00610	O14976	CLTC	GAK	psi-mi:MI:0007(anti tag coimmunoprecipitation)
Q14746	Q9H9E3	COG2	COG4	psi-mi:MI:0019(coimmunoprecipitation)
Q14746	Q9H9E3	COG2	COG4	psi-mi:MI:0019(coimmunoprecipitation)
Q96JB2	Q8WVM8	COG3	SCFD1	psi-mi:MI:0006(anti bait coimmunoprecipitation)
Q96JB2	Q8WVM8	COG3	SCFD1	psi-mi:MI:0006(anti bait coimmunoprecipitation)
Q96JB2	Q96MW5	COG3	COG8	psi-mi:MI:0006(anti bait coimmunoprecipitation)
Q96JB2	Q96MW5	COG3	COG8	psi-mi:MI:0006(anti bait coimmunoprecipitation)
Q96JB2	P83436	COG3	COG7	psi-mi:MI:0006(anti bait coimmunoprecipitation)
Q96JB2	P83436	COG3	COG7	psi-mi:MI:0006(anti bait coimmunoprecipitation)
Q96JB2	Q9H9E3	COG3	COG4	psi-mi:MI:0006(anti bait coimmunoprecipitation)
Q96JB2	Q9H9E3	COG3	COG4	psi-mi:MI:0006(anti bait coimmunoprecipitation)
Q9H9E3	Q8WVM8	COG4	SCFD1	psi-mi:MI:0006(anti bait coimmunoprecipitation)
Q9H9E3	Q8WVM8	COG4	SCFD1	psi-mi:MI:0006(anti bait coimmunoprecipitation)
Q9H9E3	Q8WVM8	COG4	SCFD1	psi-mi:MI:0007(anti tag coimmunoprecipitation)
Q9H9E3	Q8WVM8	COG4	SCFD1	psi-mi:MI:0007(anti tag coimmunoprecipitation)
Q9H9E3	Q8WVM8	COG4	SCFD1	psi-mi:MI:0007(anti tag coimmunoprecipitation)
Q9H9E3	Q8WVM8	COG4	SCFD1	psi-mi:MI:0007(anti tag coimmunoprecipitation)
Q9H9E3	Q8WVM8	COG4	SCFD1	psi-mi:MI:0096(pull down)
Q9H9E3	Q8WVM8	COG4	SCFD1	psi-mi:MI:0096(pull down)
Q9H9E3	Q8WVM8	COG4	SCFD1	psi-mi:MI:0096(pull down)
Q9H9E3	Q8WVM8	COG4	SCFD1	psi-mi:MI:0096(pull down)
Q9H9E3	Q96JB2	COG4	COG3	psi-mi:MI:0006(anti bait coimmunoprecipitation)
Q9H9E3	Q96JB2	COG4	COG3	psi-mi:MI:0006(anti bait coimmunoprecipitation)
Q9H9E3	Q13190	COG4	STX5	psi-mi:MI:0096(pull down)
Q9H9E3	Q13190	COG4	STX5	psi-mi:MI:0096(pull down)
Q9H9E3	Q9UP83	COG4	COG5	psi-mi:MI:0019(coimmunoprecipitation)
Q9H9E3	Q9UP83	COG4	COG5	psi-mi:MI:0019(coimmunoprecipitation)
Q9H9E3	Q14746	COG4	COG2	psi-mi:MI:0019(coimmunoprecipitation)
Q9H9E3	Q14746	COG4	COG2	psi-mi:MI:0019(coimmunoprecipitation)
Q9H9E3	Q96MW5	COG4	COG8	psi-mi:MI:0006(anti bait coimmunoprecipitation)
Q9H9E3	Q96MW5	COG4	COG8	psi-mi:MI:0006(anti bait coimmunoprecipitation)
Q9H9E3	P83436	COG4	COG7	psi-mi:MI:0006(anti bait coimmunoprecipitation)
Q9H9E3	P83436	COG4	COG7	psi-mi:MI:0006(anti bait coimmunoprecipitation)
Q9H9E3	P83436	COG4	COG7	psi-mi:MI:0019(coimmunoprecipitation)
Q9H9E3	P83436	COG4	COG7	psi-mi:MI:0019(coimmunoprecipitation)
Q9H9E3	Q8WTW3	COG4	COG1	psi-mi:MI:0019(coimmunoprecipitation)
Q9H9E3	Q8WTW3	COG4	COG1	psi-mi:MI:0019(coimmunoprecipitation)
Q9H9E3	Q8WTW3	COG4	COG1	psi-mi:MI:0019(coimmunoprecipitation)
Q9H9E3	Q8WTW3	COG4	COG1	psi-mi:MI:0019(coimmunoprecipitation)
Q9UP83	P83436	COG5	COG7	psi-mi:MI:0019(coimmunoprecipitation)
Q9UP83	P83436	COG5	COG7	psi-mi:MI:0019(coimmunoprecipitation)
Q9UP83	Q9H9E3	COG5	COG4	psi-mi:MI:0019(coimmunoprecipitation)
Q9UP83	Q9H9E3	COG5	COG4	psi-mi:MI:0019(coimmunoprecipitation)
Q9Y2V7	Q9H9E3	COG6	COG4	psi-mi:MI:0006(anti bait coimmunoprecipitation)
P83436	Q8WVM8	COG7	SCFD1	psi-mi:MI:0006(anti bait coimmunoprecipitation)
P83436	Q8WVM8	COG7	SCFD1	psi-mi:MI:0006(anti bait coimmunoprecipitation)
P83436	Q96JB2	COG7	COG3	psi-mi:MI:0006(anti bait coimmunoprecipitation)
P83436	Q96JB2	COG7	COG3	psi-mi:MI:0006(anti bait coimmunoprecipitation)
P83436	Q9UP83	COG7	COG5	psi-mi:MI:0019(coimmunoprecipitation)
P83436	Q9UP83	COG7	COG5	psi-mi:MI:0019(coimmunoprecipitation)
P83436	Q96MW5	COG7	COG8	psi-mi:MI:0006(anti bait coimmunoprecipitation)
P83436	Q96MW5	COG7	COG8	psi-mi:MI:0006(anti bait coimmunoprecipitation)
P83436	Q9H9E3	COG7	COG4	psi-mi:MI:0006(anti bait coimmunoprecipitation)
P83436	Q9H9E3	COG7	COG4	psi-mi:MI:0006(anti bait coimmunoprecipitation)
P83436	Q9H9E3	COG7	COG4	psi-mi:MI:0019(coimmunoprecipitation)
P83436	Q9H9E3	COG7	COG4	psi-mi:MI:0019(coimmunoprecipitation)
P35606	O14908	COPB2	GIPC1	psi-mi:MI:0006(anti bait coimmunoprecipitation)
Q9Y678	P30480	COPG1	HLA-B	psi-mi:MI:0006(anti bait coimmunoprecipitation)
O75534	P30480	CSDE1	HLA-B	psi-mi:MI:0006(anti bait coimmunoprecipitation)
Q14247	P00533	CTTN	EGFR	psi-mi:MI:0007(anti tag coimmunoprecipitation)
Q05193	Q5S007	DNM1	LRRK2	psi-mi:MI:0007(anti tag coimmunoprecipitation)
Q05193	Q5S007	DNM1	LRRK2	psi-mi:MI:0007(anti tag coimmunoprecipitation)
O00429	Q5S007	DNM1L	LRRK2	psi-mi:MI:0006(anti bait coimmunoprecipitation)
O00429	Q5S007	DNM1L	LRRK2	psi-mi:MI:0007(anti tag coimmunoprecipitation)
O00429	Q5S007	DNM1L	LRRK2	psi-mi:MI:0007(anti tag coimmunoprecipitation)
O00429	Q5S007	DNM1L	LRRK2	psi-mi:MI:0424(protein kinase assay)
Q9H410	O95229	DSN1	ZWINT	psi-mi:MI:0007(anti tag coimmunoprecipitation)
Q9H410	O95229	DSN1	ZWINT	psi-mi:MI:0676(tandem affinity purification)
O14640	Q5S007	DVL1	LRRK2	psi-mi:MI:0007(anti tag coimmunoprecipitation)
P01133	P00533	EGF	EGFR	psi-mi:MI:0006(anti bait coimmunoprecipitation)
P01133	P00533	EGF	EGFR	psi-mi:MI:0107(surface plasmon resonance)
P01133	P00533	EGF	EGFR	psi-mi:MI:0107(surface plasmon resonance)
P01133	P00533	EGF	EGFR	psi-mi:MI:0107(surface plasmon resonance)
P01133	P00533	EGF	EGFR	psi-mi:MI:0826(x ray scattering)
P00533	Q03135	EGFR	CAV1	psi-mi:MI:0006(anti bait coimmunoprecipitation)
P00533	Q03135	EGFR	CAV1	psi-mi:MI:0006(anti bait coimmunoprecipitation)
P00533	Q03135	EGFR	CAV1	psi-mi:MI:0006(anti bait coimmunoprecipitation)
P00533	Q03135	EGFR	CAV1	psi-mi:MI:0006(anti bait coimmunoprecipitation)
P00533	Q03135	EGFR	CAV1	psi-mi:MI:0006(anti bait coimmunoprecipitation)
P00533	P51636	EGFR	CAV2	psi-mi:MI:0006(anti bait coimmunoprecipitation)
P00533	P35221	EGFR	CTNNA1	psi-mi:MI:0006(anti bait coimmunoprecipitation)
P00533	P35221	EGFR	CTNNA1	psi-mi:MI:0006(anti bait coimmunoprecipitation)
P00533	P35221	EGFR	CTNNA1	psi-mi:MI:0676(tandem affinity purification)
P00533	P12830	EGFR	CDH1	psi-mi:MI:0676(tandem affinity purification)
P00533	Q09666	EGFR	AHNAK	psi-mi:MI:0676(tandem affinity purification)
P00533	Q09666	EGFR	AHNAK	psi-mi:MI:0676(tandem affinity purification)
P00533	P07947	EGFR	YES1	psi-mi:MI:0006(anti bait coimmunoprecipitation)
P00533	P07947	EGFR	YES1	psi-mi:MI:0006(anti bait coimmunoprecipitation)
P00533	P07947	EGFR	YES1	psi-mi:MI:0006(anti bait coimmunoprecipitation)
P00533	Q8WUM4	EGFR	PDCD6IP	psi-mi:MI:0006(anti bait coimmunoprecipitation)
P00533	Q8WUM4	EGFR	PDCD6IP	psi-mi:MI:0006(anti bait coimmunoprecipitation)
P00533	Q07912	EGFR	TNK2	psi-mi:MI:0006(anti bait coimmunoprecipitation)
P00533	Q07912	EGFR	TNK2	psi-mi:MI:0006(anti bait coimmunoprecipitation)
P00533	Q12933	EGFR	TRAF2	psi-mi:MI:0007(anti tag coimmunoprecipitation)
P00533	P13987	EGFR	CD59	psi-mi:MI:0055(fluorescent resonance energy transfer)
P00533	O95782	EGFR	AP2A1	psi-mi:MI:0006(anti bait coimmunoprecipitation)
P00533	O95782	EGFR	AP2A1	psi-mi:MI:0676(tandem affinity purification)
P00533	O95782	EGFR	AP2A1	psi-mi:MI:0676(tandem affinity purification)
P00533	O95782	EGFR	AP2A1	psi-mi:MI:0676(tandem affinity purification)
P00533	O94973	EGFR	AP2A2	psi-mi:MI:0676(tandem affinity purification)
P00533	O94973	EGFR	AP2A2	psi-mi:MI:0676(tandem affinity purification)
P00533	Q96CW1	EGFR	AP2M1	psi-mi:MI:0676(tandem affinity purification)
P00533	Q96CW1	EGFR	AP2M1	psi-mi:MI:0676(tandem affinity purification)
P00533	P63010	EGFR	AP2B1	psi-mi:MI:0676(tandem affinity purification)
P00533	P63010	EGFR	AP2B1	psi-mi:MI:0676(tandem affinity purification)
P00533	P63010	EGFR	AP2B1	psi-mi:MI:0676(tandem affinity purification)
P00533	P53680	EGFR	AP2S1	psi-mi:MI:0676(tandem affinity purification)
P00533	P16615	EGFR	ATP2A2	psi-mi:MI:0006(anti bait coimmunoprecipitation)
P00533	P16615	EGFR	ATP2A2	psi-mi:MI:0676(tandem affinity purification)
P00533	P00533	EGFR	EGFR	psi-mi:MI:0007(anti tag coimmunoprecipitation)
P00533	P00533	EGFR	EGFR	psi-mi:MI:0007(anti tag coimmunoprecipitation)
P00533	P00533	EGFR	EGFR	psi-mi:MI:0055(fluorescent resonance energy transfer)
P00533	P00533	EGFR	EGFR	psi-mi:MI:0055(fluorescent resonance energy transfer)
P00533	P00533	EGFR	EGFR	psi-mi:MI:0055(fluorescent resonance energy transfer)
P00533	P00533	EGFR	EGFR	psi-mi:MI:0055(fluorescent resonance energy transfer)
P00533	P00533	EGFR	EGFR	psi-mi:MI:0077(nuclear magnetic resonance)
P00533	P00533	EGFR	EGFR	psi-mi:MI:0077(nuclear magnetic resonance)
P00533	P00533	EGFR	EGFR	psi-mi:MI:0114(x-ray crystallography)
P00533	P00533	EGFR	EGFR	psi-mi:MI:0114(x-ray crystallography)
P00533	P00533	EGFR	EGFR	psi-mi:MI:0114(x-ray crystallography)
P00533	P00533	EGFR	EGFR	psi-mi:MI:0114(x-ray crystallography)
P00533	P00533	EGFR	EGFR	psi-mi:MI:0424(protein kinase assay)
P00533	P00533	EGFR	EGFR	psi-mi:MI:0424(protein kinase assay)
P00533	P00533	EGFR	EGFR	psi-mi:MI:0424(protein kinase assay)
P00533	P00533	EGFR	EGFR	psi-mi:MI:0424(protein kinase assay)
P00533	P00533	EGFR	EGFR	psi-mi:MI:0424(protein kinase assay)
P00533	P00533	EGFR	EGFR	psi-mi:MI:0424(protein kinase assay)
P00533	P00533	EGFR	EGFR	psi-mi:MI:0841(phosphotransferase assay)
P00533	P00533	EGFR	EGFR	psi-mi:MI:0841(phosphotransferase assay)
P00533	P05023	EGFR	ATP1A1	psi-mi:MI:0006(anti bait coimmunoprecipitation)
P00533	P05026	EGFR	ATP1B1	psi-mi:MI:0006(anti bait coimmunoprecipitation)
P00533	P04083	EGFR	ANXA1	psi-mi:MI:0007(anti tag coimmunoprecipitation)
P00533	P04083	EGFR	ANXA1	psi-mi:MI:0676(tandem affinity purification)
P00533	P15941	EGFR	MUC1	psi-mi:MI:0006(anti bait coimmunoprecipitation)
P00533	P11142	EGFR	HSPA8	psi-mi:MI:0006(anti bait coimmunoprecipitation)
P00533	P11142	EGFR	HSPA8	psi-mi:MI:0006(anti bait coimmunoprecipitation)
P00533	P11142	EGFR	HSPA8	psi-mi:MI:0676(tandem affinity purification)
P00533	P11142	EGFR	HSPA8	psi-mi:MI:0676(tandem affinity purification)
P00533	P11142	EGFR	HSPA8	psi-mi:MI:0676(tandem affinity purification)
P00533	P11142	EGFR	HSPA8	psi-mi:MI:0676(tandem affinity purification)
P00533	Q14457	EGFR	BECN1	psi-mi:MI:0006(anti bait coimmunoprecipitation)
P00533	Q14457	EGFR	BECN1	psi-mi:MI:0006(anti bait coimmunoprecipitation)
P00533	Q14457	EGFR	BECN1	psi-mi:MI:0006(anti bait coimmunoprecipitation)
P00533	Q14457	EGFR	BECN1	psi-mi:MI:0006(anti bait coimmunoprecipitation)
P00533	Q14457	EGFR	BECN1	psi-mi:MI:0007(anti tag coimmunoprecipitation)
P00533	Q14457	EGFR	BECN1	psi-mi:MI:0007(anti tag coimmunoprecipitation)
P00533	P51149	EGFR	RAB7A	psi-mi:MI:0006(anti bait coimmunoprecipitation)
P00533	P07900	EGFR	HSP90AA1	psi-mi:MI:0676(tandem affinity purification)
P00533	P07900	EGFR	HSP90AA1	psi-mi:MI:0676(tandem affinity purification)
P00533	P07355	EGFR	ANXA2	psi-mi:MI:0006(anti bait coimmunoprecipitation)
P00533	Q9P0L0	EGFR	VAPA	psi-mi:MI:0007(anti tag coimmunoprecipitation)
P00533	Q99962	EGFR	SH3GL2	psi-mi:MI:0006(anti bait coimmunoprecipitation)
P00533	P01135	EGFR	TGFA	psi-mi:MI:0114(x-ray crystallography)
P00533	P63104	EGFR	YWHAZ	psi-mi:MI:0006(anti bait coimmunoprecipitation)
P00533	P63104	EGFR	YWHAZ	psi-mi:MI:0006(anti bait coimmunoprecipitation)
P00533	P0DP25	EGFR	CALM3	psi-mi:MI:0006(anti bait coimmunoprecipitation)
P00533	P0DP25	EGFR	CALM3	psi-mi:MI:0006(anti bait coimmunoprecipitation)
P00533	Q14247	EGFR	CTTN	psi-mi:MI:0007(anti tag coimmunoprecipitation)
P00533	P16234	EGFR	PDGFRA	psi-mi:MI:0007(anti tag coimmunoprecipitation)
P00533	Q86VI4	EGFR	LAPTM4B	psi-mi:MI:0006(anti bait coimmunoprecipitation)
P00533	Q86VI4	EGFR	LAPTM4B	psi-mi:MI:0006(anti bait coimmunoprecipitation)
P00533	Q86VI4	EGFR	LAPTM4B	psi-mi:MI:0007(anti tag coimmunoprecipitation)
P00533	Q86VI4	EGFR	LAPTM4B	psi-mi:MI:0007(anti tag coimmunoprecipitation)
P00533	P10809	EGFR	HSPD1	psi-mi:MI:0006(anti bait coimmunoprecipitation)
P00533	P11021	EGFR	HSPA5	psi-mi:MI:0006(anti bait coimmunoprecipitation)
P00533	P11021	EGFR	HSPA5	psi-mi:MI:0676(tandem affinity purification)
P00533	P11021	EGFR	HSPA5	psi-mi:MI:0676(tandem affinity purification)
P00533	P11021	EGFR	HSPA5	psi-mi:MI:0676(tandem affinity purification)
P00533	P11021	EGFR	HSPA5	psi-mi:MI:0676(tandem affinity purification)
P00533	P14174	EGFR	MIF	psi-mi:MI:0006(anti bait coimmunoprecipitation)
P00533	P14174	EGFR	MIF	psi-mi:MI:0007(anti tag coimmunoprecipitation)
P00533	P14174	EGFR	MIF	psi-mi:MI:0096(pull down)
P00533	P01892	EGFR	HLA-A	psi-mi:MI:0676(tandem affinity purification)
P00533	P07948	EGFR	LYN	psi-mi:MI:0006(anti bait coimmunoprecipitation)
P00533	P07948	EGFR	LYN	psi-mi:MI:0006(anti bait coimmunoprecipitation)
P00533	P07948	EGFR	LYN	psi-mi:MI:0006(anti bait coimmunoprecipitation)
P00533	P07948	EGFR	LYN	psi-mi:MI:0006(anti bait coimmunoprecipitation)
P00533	P07948	EGFR	LYN	psi-mi:MI:0006(anti bait coimmunoprecipitation)
P00533	P07948	EGFR	LYN	psi-mi:MI:0006(anti bait coimmunoprecipitation)
P00533	P07948	EGFR	LYN	psi-mi:MI:0424(protein kinase assay)
P00533	P62993	EGFR	GRB2	psi-mi:MI:0006(anti bait coimmunoprecipitation)
P00533	P62993	EGFR	GRB2	psi-mi:MI:0006(anti bait coimmunoprecipitation)
P00533	P62993	EGFR	GRB2	psi-mi:MI:0006(anti bait coimmunoprecipitation)
P00533	P62993	EGFR	GRB2	psi-mi:MI:0006(anti bait coimmunoprecipitation)
P00533	P62993	EGFR	GRB2	psi-mi:MI:0006(anti bait coimmunoprecipitation)
P00533	P62993	EGFR	GRB2	psi-mi:MI:0006(anti bait coimmunoprecipitation)
P00533	P62993	EGFR	GRB2	psi-mi:MI:0006(anti bait coimmunoprecipitation)
P00533	P62993	EGFR	GRB2	psi-mi:MI:0006(anti bait coimmunoprecipitation)
P00533	P62993	EGFR	GRB2	psi-mi:MI:0006(anti bait coimmunoprecipitation)
P00533	P62993	EGFR	GRB2	psi-mi:MI:0019(coimmunoprecipitation)
P00533	P62993	EGFR	GRB2	psi-mi:MI:0019(coimmunoprecipitation)
P00533	P62993	EGFR	GRB2	psi-mi:MI:0019(coimmunoprecipitation)
P00533	P62993	EGFR	GRB2	psi-mi:MI:0019(coimmunoprecipitation)
P00533	P62993	EGFR	GRB2	psi-mi:MI:0096(pull down)
P00533	P62993	EGFR	GRB2	psi-mi:MI:0096(pull down)
P00533	P62993	EGFR	GRB2	psi-mi:MI:0096(pull down)
P00533	P62993	EGFR	GRB2	psi-mi:MI:0096(pull down)
P00533	P62993	EGFR	GRB2	psi-mi:MI:0096(pull down)
P00533	P62993	EGFR	GRB2	psi-mi:MI:0096(pull down)
P00533	P62993	EGFR	GRB2	psi-mi:MI:0096(pull down)
P00533	P62993	EGFR	GRB2	psi-mi:MI:0676(tandem affinity purification)
P00533	P62993	EGFR	GRB2	psi-mi:MI:0676(tandem affinity purification)
P00533	P62993	EGFR	GRB2	psi-mi:MI:0676(tandem affinity purification)
P00533	P16333	EGFR	NCK1	psi-mi:MI:0019(coimmunoprecipitation)
P00533	P31948	EGFR	STIP1	psi-mi:MI:0007(anti tag coimmunoprecipitation)
P00533	P04114	EGFR	APOB	psi-mi:MI:0676(tandem affinity purification)
P00533	P14618	EGFR	PKM	psi-mi:MI:0424(protein kinase assay)
P00533	P22681	EGFR	CBL	psi-mi:MI:0006(anti bait coimmunoprecipitation)
P00533	P22681	EGFR	CBL	psi-mi:MI:0006(anti bait coimmunoprecipitation)
P00533	P22681	EGFR	CBL	psi-mi:MI:0006(anti bait coimmunoprecipitation)
P00533	P22681	EGFR	CBL	psi-mi:MI:0006(anti bait coimmunoprecipitation)
P00533	P22681	EGFR	CBL	psi-mi:MI:0006(anti bait coimmunoprecipitation)
P00533	P22681	EGFR	CBL	psi-mi:MI:0006(anti bait coimmunoprecipitation)
P00533	P22681	EGFR	CBL	psi-mi:MI:0006(anti bait coimmunoprecipitation)
P00533	P22681	EGFR	CBL	psi-mi:MI:0006(anti bait coimmunoprecipitation)
P00533	P22681	EGFR	CBL	psi-mi:MI:0006(anti bait coimmunoprecipitation)
P00533	P22681	EGFR	CBL	psi-mi:MI:0019(coimmunoprecipitation)
P00533	P22681	EGFR	CBL	psi-mi:MI:0096(pull down)
P00533	P22681	EGFR	CBL	psi-mi:MI:0096(pull down)
P00533	P22681	EGFR	CBL	psi-mi:MI:0114(x-ray crystallography)
P00533	Q10567	EGFR	AP1B1	psi-mi:MI:0676(tandem affinity purification)
P00533	P09496	EGFR	CLTA	psi-mi:MI:0006(anti bait coimmunoprecipitation)
P00533	P09496	EGFR	CLTA	psi-mi:MI:0006(anti bait coimmunoprecipitation)
P00533	P53675	EGFR	CLTCL1	psi-mi:MI:0006(anti bait coimmunoprecipitation)
P00533	O00443	EGFR	PIK3C2A	psi-mi:MI:0006(anti bait coimmunoprecipitation)
P00533	P01133	EGFR	EGF	psi-mi:MI:0107(surface plasmon resonance)
P00533	P01133	EGFR	EGF	psi-mi:MI:0114(x-ray crystallography)
P00533	P01133	EGFR	EGF	psi-mi:MI:0114(x-ray crystallography)
P00533	P55735	EGFR	SEC13	psi-mi:MI:0006(anti bait coimmunoprecipitation)
P00533	O00750	EGFR	PIK3C2B	psi-mi:MI:0006(anti bait coimmunoprecipitation)
P00533	O00750	EGFR	PIK3C2B	psi-mi:MI:0006(anti bait coimmunoprecipitation)
P00533	O00750	EGFR	PIK3C2B	psi-mi:MI:0006(anti bait coimmunoprecipitation)
P00533	P0CG47	EGFR	UBB	psi-mi:MI:0006(anti bait coimmunoprecipitation)
P00533	O75674	EGFR	TOM1L1	psi-mi:MI:0006(anti bait coimmunoprecipitation)
P00533	O75674	EGFR	TOM1L1	psi-mi:MI:0006(anti bait coimmunoprecipitation)
P00533	O75674	EGFR	TOM1L1	psi-mi:MI:0006(anti bait coimmunoprecipitation)
P00533	P04406	EGFR	GAPDH	psi-mi:MI:0006(anti bait coimmunoprecipitation)
P00533	P04406	EGFR	GAPDH	psi-mi:MI:0006(anti bait coimmunoprecipitation)
P00533	P04406	EGFR	GAPDH	psi-mi:MI:0007(anti tag coimmunoprecipitation)
P00533	P03372	EGFR	ESR1	psi-mi:MI:0006(anti bait coimmunoprecipitation)
P00533	P03372	EGFR	ESR1	psi-mi:MI:0006(anti bait coimmunoprecipitation)
P00533	P03372	EGFR	ESR1	psi-mi:MI:0006(anti bait coimmunoprecipitation)
P00533	P03372	EGFR	ESR1	psi-mi:MI:0006(anti bait coimmunoprecipitation)
P00533	P03372	EGFR	ESR1	psi-mi:MI:0007(anti tag coimmunoprecipitation)
P00533	P50281	EGFR	MMP14	psi-mi:MI:0676(tandem affinity purification)
P00533	Q8WV24	EGFR	PHLDA1	psi-mi:MI:0676(tandem affinity purification)
P00533	O95573	EGFR	ACSL3	psi-mi:MI:0676(tandem affinity purification)
P00533	Q8NBJ4	EGFR	GOLM1	psi-mi:MI:0006(anti bait coimmunoprecipitation)
P00533	Q8NBJ4	EGFR	GOLM1	psi-mi:MI:0006(anti bait coimmunoprecipitation)
P00533	Q8NBJ4	EGFR	GOLM1	psi-mi:MI:0006(anti bait coimmunoprecipitation)
P00533	Q8NBJ4	EGFR	GOLM1	psi-mi:MI:0006(anti bait coimmunoprecipitation)
P00533	Q8NBJ4	EGFR	GOLM1	psi-mi:MI:0007(anti tag coimmunoprecipitation)
P00533	Q8NBJ4	EGFR	GOLM1	psi-mi:MI:0007(anti tag coimmunoprecipitation)
P00533	Q8NBJ4	EGFR	GOLM1	psi-mi:MI:0007(anti tag coimmunoprecipitation)
P00533	Q8NBJ4	EGFR	GOLM1	psi-mi:MI:0007(anti tag coimmunoprecipitation)
P00533	Q8NBJ4	EGFR	GOLM1	psi-mi:MI:0007(anti tag coimmunoprecipitation)
P00533	Q8NBJ4	EGFR	GOLM1	psi-mi:MI:0007(anti tag coimmunoprecipitation)
P00533	Q8NBJ4	EGFR	GOLM1	psi-mi:MI:0007(anti tag coimmunoprecipitation)
P00533	Q8NBJ4	EGFR	GOLM1	psi-mi:MI:0007(anti tag coimmunoprecipitation)
P00533	Q8NBJ4	EGFR	GOLM1	psi-mi:MI:0096(pull down)
P00533	Q8NBJ4	EGFR	GOLM1	psi-mi:MI:0096(pull down)
P00533	Q75V66	EGFR	ANO5	psi-mi:MI:0676(tandem affinity purification)
P00533	Q75V66	EGFR	ANO5	psi-mi:MI:0676(tandem affinity purification)
Q12929	P00533	EPS8	EGFR	psi-mi:MI:0007(anti tag coimmunoprecipitation)
P30040	P30480	ERP29	HLA-B	psi-mi:MI:0006(anti bait coimmunoprecipitation)
P10768	P30480	ESD	HLA-B	psi-mi:MI:0006(anti bait coimmunoprecipitation)
P03372	P00533	ESR1	EGFR	psi-mi:MI:0007(anti tag coimmunoprecipitation)
Q92731	Q9Y2V7	ESR2	COG6	psi-mi:MI:0676(tandem affinity purification)
Q92731	Q9Y2V7	ESR2	COG6	psi-mi:MI:0676(tandem affinity purification)
O60645	P00533	EXOC3	EGFR	psi-mi:MI:0006(anti bait coimmunoprecipitation)
P15311	P0DMV8	EZR	HSPA1A	psi-mi:MI:0096(pull down)
P15311	P30480	EZR	HLA-B	psi-mi:MI:0006(anti bait coimmunoprecipitation)
Q8IXL6	Q8NBJ4	FAM20C	GOLM1	psi-mi:MI:0424(protein kinase assay)
P02751	P00533	FN1	EGFR	psi-mi:MI:0007(anti tag coimmunoprecipitation)
Q96RU3	Q9H0R8	FNBP1	GABARAPL1	psi-mi:MI:0096(pull down)
Q99853	Q9UP83	FOXB1	COG5	psi-mi:MI:0676(tandem affinity purification)
Q99853	Q9UP83	FOXB1	COG5	psi-mi:MI:0676(tandem affinity purification)
Q12952	Q9UP83	FOXL1	COG5	psi-mi:MI:0676(tandem affinity purification)
Q12952	Q9UP83	FOXL1	COG5	psi-mi:MI:0676(tandem affinity purification)
Q9BQS8	Q9H0R8	FYCO1	GABARAPL1	psi-mi:MI:0096(pull down)
O95166	P11142	GABARAP	HSPA8	psi-mi:MI:0007(anti tag coimmunoprecipitation)
Q9H0R8	P17987	GABARAPL1	TCP1	psi-mi:MI:0007(anti tag coimmunoprecipitation)
Q9H0R8	P27797	GABARAPL1	CALR	psi-mi:MI:0007(anti tag coimmunoprecipitation)
Q9H0R8	P36639	GABARAPL1	NUDT1	psi-mi:MI:0007(anti tag coimmunoprecipitation)
Q9H0R8	P45880	GABARAPL1	VDAC2	psi-mi:MI:0007(anti tag coimmunoprecipitation)
Q9H0R8	P06396	GABARAPL1	GSN	psi-mi:MI:0007(anti tag coimmunoprecipitation)
Q9H0R8	P15311	GABARAPL1	EZR	psi-mi:MI:0007(anti tag coimmunoprecipitation)
Q9H0R8	O95166	GABARAPL1	GABARAP	psi-mi:MI:0007(anti tag coimmunoprecipitation)
Q9H0R8	O95166	GABARAPL1	GABARAP	psi-mi:MI:0007(anti tag coimmunoprecipitation)
Q9H0R8	O95166	GABARAPL1	GABARAP	psi-mi:MI:0007(anti tag coimmunoprecipitation)
Q9H0R8	O95166	GABARAPL1	GABARAP	psi-mi:MI:0007(anti tag coimmunoprecipitation)
Q9H0R8	O95166	GABARAPL1	GABARAP	psi-mi:MI:0007(anti tag coimmunoprecipitation)
Q9H0R8	P60709	GABARAPL1	ACTB	psi-mi:MI:0007(anti tag coimmunoprecipitation)
Q9H0R8	O75369	GABARAPL1	FLNB	psi-mi:MI:0007(anti tag coimmunoprecipitation)
Q9H0R8	Q09666	GABARAPL1	AHNAK	psi-mi:MI:0007(anti tag coimmunoprecipitation)
Q9H0R8	P04004	GABARAPL1	VTN	psi-mi:MI:0007(anti tag coimmunoprecipitation)
Q9H0R8	Q9Y625	GABARAPL1	GPC6	psi-mi:MI:0007(anti tag coimmunoprecipitation)
Q9H0R8	P02787	GABARAPL1	TF	psi-mi:MI:0007(anti tag coimmunoprecipitation)
Q9H0R8	P04083	GABARAPL1	ANXA1	psi-mi:MI:0007(anti tag coimmunoprecipitation)
Q9H0R8	P41743	GABARAPL1	PRKCI	psi-mi:MI:0007(anti tag coimmunoprecipitation)
Q9H0R8	P41743	GABARAPL1	PRKCI	psi-mi:MI:0007(anti tag coimmunoprecipitation)
Q9H0R8	P46934	GABARAPL1	NEDD4	psi-mi:MI:0007(anti tag coimmunoprecipitation)
Q9H0R8	P46934	GABARAPL1	NEDD4	psi-mi:MI:0007(anti tag coimmunoprecipitation)
Q9H0R8	P46934	GABARAPL1	NEDD4	psi-mi:MI:0007(anti tag coimmunoprecipitation)
Q9H0R8	P46934	GABARAPL1	NEDD4	psi-mi:MI:0007(anti tag coimmunoprecipitation)
Q9H0R8	P46934	GABARAPL1	NEDD4	psi-mi:MI:0007(anti tag coimmunoprecipitation)
Q9H0R8	Q9H1Y0	GABARAPL1	ATG5	psi-mi:MI:0096(pull down)
Q9H0R8	Q9H0R8	GABARAPL1	GABARAPL1	psi-mi:MI:0007(anti tag coimmunoprecipitation)
Q9H0R8	Q9H0R8	GABARAPL1	GABARAPL1	psi-mi:MI:0007(anti tag coimmunoprecipitation)
Q9H0R8	Q9H0R8	GABARAPL1	GABARAPL1	psi-mi:MI:0007(anti tag coimmunoprecipitation)
Q9H0R8	Q9H0R8	GABARAPL1	GABARAPL1	psi-mi:MI:0007(anti tag coimmunoprecipitation)
Q9H0R8	Q9H0R8	GABARAPL1	GABARAPL1	psi-mi:MI:0007(anti tag coimmunoprecipitation)
Q9H0R8	Q9H0R8	GABARAPL1	GABARAPL1	psi-mi:MI:0007(anti tag coimmunoprecipitation)
Q9H0R8	Q9H0R8	GABARAPL1	GABARAPL1	psi-mi:MI:0007(anti tag coimmunoprecipitation)
Q9H0R8	Q9H0R8	GABARAPL1	GABARAPL1	psi-mi:MI:0007(anti tag coimmunoprecipitation)
Q9H0R8	P60520	GABARAPL1	GABARAPL2	psi-mi:MI:0007(anti tag coimmunoprecipitation)
Q9H0R8	P60520	GABARAPL1	GABARAPL2	psi-mi:MI:0007(anti tag coimmunoprecipitation)
Q9H0R8	P60520	GABARAPL1	GABARAPL2	psi-mi:MI:0007(anti tag coimmunoprecipitation)
Q9H0R8	P60520	GABARAPL1	GABARAPL2	psi-mi:MI:0007(anti tag coimmunoprecipitation)
Q9H0R8	P60520	GABARAPL1	GABARAPL2	psi-mi:MI:0007(anti tag coimmunoprecipitation)
Q9H0R8	P11142	GABARAPL1	HSPA8	psi-mi:MI:0007(anti tag coimmunoprecipitation)
Q9H0R8	P11142	GABARAPL1	HSPA8	psi-mi:MI:0007(anti tag coimmunoprecipitation)
Q9H0R8	P19474	GABARAPL1	TRIM21	psi-mi:MI:0007(anti tag coimmunoprecipitation)
Q9H0R8	Q9BQS8	GABARAPL1	FYCO1	psi-mi:MI:0096(pull down)
Q9H0R8	P51149	GABARAPL1	RAB7A	psi-mi:MI:0007(anti tag coimmunoprecipitation)
Q9H0R8	Q15334	GABARAPL1	LLGL1	psi-mi:MI:0007(anti tag coimmunoprecipitation)
Q9H0R8	P41145	GABARAPL1	OPRK1	psi-mi:MI:0007(anti tag coimmunoprecipitation)
Q9H0R8	P41145	GABARAPL1	OPRK1	psi-mi:MI:0096(pull down)
Q9H0R8	P07900	GABARAPL1	HSP90AA1	psi-mi:MI:0007(anti tag coimmunoprecipitation)
Q9H0R8	Q9BZH6	GABARAPL1	WDR11	psi-mi:MI:0007(anti tag coimmunoprecipitation)
Q9H0R8	Q9BZH6	GABARAPL1	WDR11	psi-mi:MI:0007(anti tag coimmunoprecipitation)
Q9H0R8	Q9BZH6	GABARAPL1	WDR11	psi-mi:MI:0007(anti tag coimmunoprecipitation)
Q9H0R8	P07355	GABARAPL1	ANXA2	psi-mi:MI:0007(anti tag coimmunoprecipitation)
Q9H0R8	P29508	GABARAPL1	SERPINB3	psi-mi:MI:0007(anti tag coimmunoprecipitation)
Q9H0R8	P68371	GABARAPL1	TUBB4B	psi-mi:MI:0007(anti tag coimmunoprecipitation)
Q9H0R8	A6NMY6	GABARAPL1	ANXA2P2	psi-mi:MI:0007(anti tag coimmunoprecipitation)
Q9H0R8	O00299	GABARAPL1	CLIC1	psi-mi:MI:0007(anti tag coimmunoprecipitation)
Q9H0R8	P63104	GABARAPL1	YWHAZ	psi-mi:MI:0007(anti tag coimmunoprecipitation)
Q9H0R8	P02768	GABARAPL1	ALB	psi-mi:MI:0007(anti tag coimmunoprecipitation)
Q9H0R8	P60660	GABARAPL1	MYL6	psi-mi:MI:0007(anti tag coimmunoprecipitation)
Q9H0R8	P84077	GABARAPL1	ARF1	psi-mi:MI:0007(anti tag coimmunoprecipitation)
Q9H0R8	P08670	GABARAPL1	VIM	psi-mi:MI:0007(anti tag coimmunoprecipitation)
Q9H0R8	P10809	GABARAPL1	HSPD1	psi-mi:MI:0007(anti tag coimmunoprecipitation)
Q9H0R8	P09525	GABARAPL1	ANXA4	psi-mi:MI:0007(anti tag coimmunoprecipitation)
Q9H0R8	P11021	GABARAPL1	HSPA5	psi-mi:MI:0007(anti tag coimmunoprecipitation)
Q9H0R8	P14174	GABARAPL1	MIF	psi-mi:MI:0007(anti tag coimmunoprecipitation)
Q9H0R8	P30101	GABARAPL1	PDIA3	psi-mi:MI:0007(anti tag coimmunoprecipitation)
Q9H0R8	Q02487	GABARAPL1	DSC2	psi-mi:MI:0007(anti tag coimmunoprecipitation)
Q9H0R8	P23528	GABARAPL1	CFL1	psi-mi:MI:0007(anti tag coimmunoprecipitation)
Q9H0R8	Q13610	GABARAPL1	PWP1	psi-mi:MI:0007(anti tag coimmunoprecipitation)
Q9H0R8	P14618	GABARAPL1	PKM	psi-mi:MI:0007(anti tag coimmunoprecipitation)
Q9H0R8	P59190	GABARAPL1	RAB15	psi-mi:MI:0007(anti tag coimmunoprecipitation)
Q9H0R8	P49755	GABARAPL1	TMED10	psi-mi:MI:0007(anti tag coimmunoprecipitation)
Q9H0R8	Q9H6L5	GABARAPL1	RETREG1	psi-mi:MI:0096(pull down)
Q9H0R8	Q00610	GABARAPL1	CLTC	psi-mi:MI:0007(anti tag coimmunoprecipitation)
Q9H0R8	P53675	GABARAPL1	CLTCL1	psi-mi:MI:0007(anti tag coimmunoprecipitation)
Q9H0R8	Q14677	GABARAPL1	CLINT1	psi-mi:MI:0007(anti tag coimmunoprecipitation)
Q9H0R8	P14625	GABARAPL1	HSP90B1	psi-mi:MI:0007(anti tag coimmunoprecipitation)
Q9H0R8	O60568	GABARAPL1	PLOD3	psi-mi:MI:0007(anti tag coimmunoprecipitation)
Q9H0R8	P08709	GABARAPL1	F7	psi-mi:MI:0007(anti tag coimmunoprecipitation)
Q9H0R8	Q15436	GABARAPL1	SEC23A	psi-mi:MI:0007(anti tag coimmunoprecipitation)
Q9H0R8	P53992	GABARAPL1	SEC24C	psi-mi:MI:0007(anti tag coimmunoprecipitation)
Q9H0R8	O95487	GABARAPL1	SEC24B	psi-mi:MI:0007(anti tag coimmunoprecipitation)
Q9H0R8	O95486	GABARAPL1	SEC24A	psi-mi:MI:0007(anti tag coimmunoprecipitation)
Q9H0R8	Q13618	GABARAPL1	CUL3	psi-mi:MI:0007(anti tag coimmunoprecipitation)
Q9H0R8	Q13618	GABARAPL1	CUL3	psi-mi:MI:0007(anti tag coimmunoprecipitation)
Q9H0R8	P62979	GABARAPL1	RPS27A	psi-mi:MI:0007(anti tag coimmunoprecipitation)
Q9H0R8	Q92598	GABARAPL1	HSPH1	psi-mi:MI:0007(anti tag coimmunoprecipitation)
Q9H0R8	Q92734	GABARAPL1	TFG	psi-mi:MI:0007(anti tag coimmunoprecipitation)
Q9H0R8	P09211	GABARAPL1	GSTP1	psi-mi:MI:0007(anti tag coimmunoprecipitation)
Q9H0R8	P04406	GABARAPL1	GAPDH	psi-mi:MI:0007(anti tag coimmunoprecipitation)
Q9H0R8	O14744	GABARAPL1	PRMT5	psi-mi:MI:0007(anti tag coimmunoprecipitation)
Q9H0R8	Q9GZZ9	GABARAPL1	UBA5	psi-mi:MI:0096(pull down)
Q9H0R8	Q9BQA1	GABARAPL1	WDR77	psi-mi:MI:0007(anti tag coimmunoprecipitation)
Q9H0R8	Q9BQE3	GABARAPL1	TUBA1C	psi-mi:MI:0007(anti tag coimmunoprecipitation)
Q9H0R8	Q658Y4	GABARAPL1	FAM91A1	psi-mi:MI:0007(anti tag coimmunoprecipitation)
Q9H0R8	P62820	GABARAPL1	RAB1A	psi-mi:MI:0007(anti tag coimmunoprecipitation)
Q9H0R8	Q15084	GABARAPL1	PDIA6	psi-mi:MI:0007(anti tag coimmunoprecipitation)
Q9H0R8	P04040	GABARAPL1	CAT	psi-mi:MI:0007(anti tag coimmunoprecipitation)
Q9H0R8	P62937	GABARAPL1	PPIA	psi-mi:MI:0007(anti tag coimmunoprecipitation)
Q9H0R8	Q13813	GABARAPL1	SPTAN1	psi-mi:MI:0007(anti tag coimmunoprecipitation)
Q9H0R8	P37802	GABARAPL1	TAGLN2	psi-mi:MI:0007(anti tag coimmunoprecipitation)
Q9H0R8	P49327	GABARAPL1	FASN	psi-mi:MI:0007(anti tag coimmunoprecipitation)
Q9H0R8	Q14964	GABARAPL1	RAB39A	psi-mi:MI:0007(anti tag coimmunoprecipitation)
Q9H0R8	Q14964	GABARAPL1	RAB39A	psi-mi:MI:0007(anti tag coimmunoprecipitation)
Q9H0R8	Q9H082	GABARAPL1	RAB33B	psi-mi:MI:0007(anti tag coimmunoprecipitation)
Q9H0R8	Q9H082	GABARAPL1	RAB33B	psi-mi:MI:0007(anti tag coimmunoprecipitation)
P60520	P00533	GABARAPL2	EGFR	psi-mi:MI:0096(pull down)
P60520	P11142	GABARAPL2	HSPA8	psi-mi:MI:0007(anti tag coimmunoprecipitation)
P60520	Q9BXF6	GABARAPL2	RAB11FIP5	psi-mi:MI:0007(anti tag coimmunoprecipitation)
O14976	O75146	GAK	HIP1R	psi-mi:MI:0007(anti tag coimmunoprecipitation)
O14976	O00291	GAK	HIP1	psi-mi:MI:0007(anti tag coimmunoprecipitation)
O14976	Q9UM54	GAK	MYO6	psi-mi:MI:0007(anti tag coimmunoprecipitation)
O14976	Q07912	GAK	TNK2	psi-mi:MI:0007(anti tag coimmunoprecipitation)
O14976	Q5S007	GAK	LRRK2	psi-mi:MI:0007(anti tag coimmunoprecipitation)
O14976	Q5S007	GAK	LRRK2	psi-mi:MI:0007(anti tag coimmunoprecipitation)
O14976	Q5S007	GAK	LRRK2	psi-mi:MI:0007(anti tag coimmunoprecipitation)
O14976	Q5S007	GAK	LRRK2	psi-mi:MI:0007(anti tag coimmunoprecipitation)
O14976	Q5S007	GAK	LRRK2	psi-mi:MI:0007(anti tag coimmunoprecipitation)
O14976	Q5S007	GAK	LRRK2	psi-mi:MI:0007(anti tag coimmunoprecipitation)
O14976	Q5S007	GAK	LRRK2	psi-mi:MI:0007(anti tag coimmunoprecipitation)
O14976	Q5S007	GAK	LRRK2	psi-mi:MI:0007(anti tag coimmunoprecipitation)
O14976	Q5S007	GAK	LRRK2	psi-mi:MI:0007(anti tag coimmunoprecipitation)
O14976	Q5S007	GAK	LRRK2	psi-mi:MI:0007(anti tag coimmunoprecipitation)
O14976	O95782	GAK	AP2A1	psi-mi:MI:0007(anti tag coimmunoprecipitation)
O14976	O94973	GAK	AP2A2	psi-mi:MI:0007(anti tag coimmunoprecipitation)
O14976	Q96CW1	GAK	AP2M1	psi-mi:MI:0007(anti tag coimmunoprecipitation)
O14976	P63010	GAK	AP2B1	psi-mi:MI:0007(anti tag coimmunoprecipitation)
O14976	P49757	GAK	NUMB	psi-mi:MI:0007(anti tag coimmunoprecipitation)
O14976	P11142	GAK	HSPA8	psi-mi:MI:0007(anti tag coimmunoprecipitation)
O14976	P11142	GAK	HSPA8	psi-mi:MI:0007(anti tag coimmunoprecipitation)
O14976	P11142	GAK	HSPA8	psi-mi:MI:0007(anti tag coimmunoprecipitation)
O14976	P11142	GAK	HSPA8	psi-mi:MI:0007(anti tag coimmunoprecipitation)
O14976	P11142	GAK	HSPA8	psi-mi:MI:0007(anti tag coimmunoprecipitation)
O14976	P11142	GAK	HSPA8	psi-mi:MI:0007(anti tag coimmunoprecipitation)
O14976	P11142	GAK	HSPA8	psi-mi:MI:0007(anti tag coimmunoprecipitation)
O14976	P11142	GAK	HSPA8	psi-mi:MI:0007(anti tag coimmunoprecipitation)
O14976	P11142	GAK	HSPA8	psi-mi:MI:0007(anti tag coimmunoprecipitation)
O14976	P11142	GAK	HSPA8	psi-mi:MI:0007(anti tag coimmunoprecipitation)
O14976	Q9NQ11	GAK	ATP13A2	psi-mi:MI:0007(anti tag coimmunoprecipitation)
O14976	O00159	GAK	MYO1C	psi-mi:MI:0007(anti tag coimmunoprecipitation)
O14976	P0DP25	GAK	CALM3	psi-mi:MI:0007(anti tag coimmunoprecipitation)
O14976	Q8TEH3	GAK	DENND1A	psi-mi:MI:0007(anti tag coimmunoprecipitation)
O14976	Q8WXE9	GAK	STON2	psi-mi:MI:0007(anti tag coimmunoprecipitation)
O14976	Q2M2I8	GAK	AAK1	psi-mi:MI:0007(anti tag coimmunoprecipitation)
O14976	Q13492	GAK	PICALM	psi-mi:MI:0007(anti tag coimmunoprecipitation)
O14976	P09497	GAK	CLTB	psi-mi:MI:0007(anti tag coimmunoprecipitation)
O14976	Q14789	GAK	GOLGB1	psi-mi:MI:0007(anti tag coimmunoprecipitation)
O14976	P09496	GAK	CLTA	psi-mi:MI:0007(anti tag coimmunoprecipitation)
O14976	Q00610	GAK	CLTC	psi-mi:MI:0007(anti tag coimmunoprecipitation)
O14976	P53675	GAK	CLTCL1	psi-mi:MI:0007(anti tag coimmunoprecipitation)
O14976	P98082	GAK	DAB2	psi-mi:MI:0007(anti tag coimmunoprecipitation)
O14976	O00443	GAK	PIK3C2A	psi-mi:MI:0007(anti tag coimmunoprecipitation)
O14976	Q14677	GAK	CLINT1	psi-mi:MI:0007(anti tag coimmunoprecipitation)
O14976	Q14677	GAK	CLINT1	psi-mi:MI:0007(anti tag coimmunoprecipitation)
O14976	H0YEF7	GAK	PICALM	psi-mi:MI:0007(anti tag coimmunoprecipitation)
O14976	P55735	GAK	SEC13	psi-mi:MI:0007(anti tag coimmunoprecipitation)
O14976	P53992	GAK	SEC24C	psi-mi:MI:0007(anti tag coimmunoprecipitation)
O14976	Q9BY43	GAK	CHMP4A	psi-mi:MI:0007(anti tag coimmunoprecipitation)
O14976	O15027	GAK	SEC16A	psi-mi:MI:0007(anti tag coimmunoprecipitation)
O14976	Q13813	GAK	SPTAN1	psi-mi:MI:0007(anti tag coimmunoprecipitation)
Q14697	P30480	GANAB	HLA-B	psi-mi:MI:0006(anti bait coimmunoprecipitation)
Q8IWJ2	P40616	GCC2	ARL1	psi-mi:MI:0004(affinity chromatography technology)
Q8IWJ2	P20340	GCC2	RAB6A	psi-mi:MI:0004(affinity chromatography technology)
Q8IWJ2	P20340	GCC2	RAB6A	psi-mi:MI:0004(affinity chromatography technology)
Q8IWJ2	P20340	GCC2	RAB6A	psi-mi:MI:0004(affinity chromatography technology)
Q8IWJ2	P20340	GCC2	RAB6A	psi-mi:MI:0004(affinity chromatography technology)
Q8IWJ2	P20340	GCC2	RAB6A	psi-mi:MI:0114(x-ray crystallography)
Q8IWJ2	P20340	GCC2	RAB6A	psi-mi:MI:0114(x-ray crystallography)
P31150	Q6IQ22	GDI1	RAB12	psi-mi:MI:0007(anti tag coimmunoprecipitation)
P31150	P30480	GDI1	HLA-B	psi-mi:MI:0006(anti bait coimmunoprecipitation)
P31150	P61026	GDI1	RAB10	psi-mi:MI:0007(anti tag coimmunoprecipitation)
P31150	P61006	GDI1	RAB8A	psi-mi:MI:0007(anti tag coimmunoprecipitation)
P50395	P61006	GDI2	RAB8A	psi-mi:MI:0096(pull down)
Q9H4G4	Q14457	GLIPR2	BECN1	psi-mi:MI:0007(anti tag coimmunoprecipitation)
Q8NBJ4	Q9ULW5	GOLM1	RAB26	psi-mi:MI:0007(anti tag coimmunoprecipitation)
Q8NBJ4	O95782	GOLM1	AP2A1	psi-mi:MI:0007(anti tag coimmunoprecipitation)
Q8NBJ4	Q92572	GOLM1	AP3S1	psi-mi:MI:0007(anti tag coimmunoprecipitation)
Q8NBJ4	P00533	GOLM1	EGFR	psi-mi:MI:0006(anti bait coimmunoprecipitation)
Q8NBJ4	P00533	GOLM1	EGFR	psi-mi:MI:0006(anti bait coimmunoprecipitation)
Q8NBJ4	P00533	GOLM1	EGFR	psi-mi:MI:0007(anti tag coimmunoprecipitation)
Q8NBJ4	P00533	GOLM1	EGFR	psi-mi:MI:0007(anti tag coimmunoprecipitation)
Q8NBJ4	P00533	GOLM1	EGFR	psi-mi:MI:0007(anti tag coimmunoprecipitation)
Q8NBJ4	P00533	GOLM1	EGFR	psi-mi:MI:0007(anti tag coimmunoprecipitation)
Q8NBJ4	P31150	GOLM1	GDI1	psi-mi:MI:0007(anti tag coimmunoprecipitation)
Q8NBJ4	P31150	GOLM1	GDI1	psi-mi:MI:0007(anti tag coimmunoprecipitation)
Q8NBJ4	P56539	GOLM1	CAV3	psi-mi:MI:0007(anti tag coimmunoprecipitation)
Q8NBJ4	P56539	GOLM1	CAV3	psi-mi:MI:0007(anti tag coimmunoprecipitation)
Q8NBJ4	Q04721	GOLM1	NOTCH2	psi-mi:MI:0007(anti tag coimmunoprecipitation)
Q8NBJ4	P22681	GOLM1	CBL	psi-mi:MI:0007(anti tag coimmunoprecipitation)
Q8NBJ4	P22681	GOLM1	CBL	psi-mi:MI:0007(anti tag coimmunoprecipitation)
Q8NBJ4	Q86SZ2	GOLM1	TRAPPC6B	psi-mi:MI:0007(anti tag coimmunoprecipitation)
Q8NBJ4	Q5T215	GOLM1	TRAPPC3L	psi-mi:MI:0007(anti tag coimmunoprecipitation)
Q8NBJ4	Q96M96	GOLM1	FGD4	psi-mi:MI:0007(anti tag coimmunoprecipitation)
Q8NBJ4	O14653	GOLM1	GOSR2	psi-mi:MI:0007(anti tag coimmunoprecipitation)
Q8NBJ4	Q8N6H7	GOLM1	ARFGAP2	psi-mi:MI:0007(anti tag coimmunoprecipitation)
Q8NBJ4	A4D1S5	GOLM1	RAB19	psi-mi:MI:0007(anti tag coimmunoprecipitation)
Q9Y3E0	P61006	GOLT1B	RAB8A	psi-mi:MI:0007(anti tag coimmunoprecipitation)
Q9Y3E0	Q9BTV4	GOLT1B	TMEM43	psi-mi:MI:0007(anti tag coimmunoprecipitation)
Q9H8Y8	P13569	GORASP2	CFTR	psi-mi:MI:0007(anti tag coimmunoprecipitation)
Q9H8Y8	P13569	GORASP2	CFTR	psi-mi:MI:0007(anti tag coimmunoprecipitation)
O95249	Q8WVM8	GOSR1	SCFD1	psi-mi:MI:0007(anti tag coimmunoprecipitation)
P62993	P00533	GRB2	EGFR	psi-mi:MI:0006(anti bait coimmunoprecipitation)
P62993	P00533	GRB2	EGFR	psi-mi:MI:0006(anti bait coimmunoprecipitation)
P62993	P00533	GRB2	EGFR	psi-mi:MI:0006(anti bait coimmunoprecipitation)
P62993	P00533	GRB2	EGFR	psi-mi:MI:0006(anti bait coimmunoprecipitation)
P62993	P00533	GRB2	EGFR	psi-mi:MI:0006(anti bait coimmunoprecipitation)
P62993	P00533	GRB2	EGFR	psi-mi:MI:0006(anti bait coimmunoprecipitation)
P62993	P00533	GRB2	EGFR	psi-mi:MI:0006(anti bait coimmunoprecipitation)
P62993	P00533	GRB2	EGFR	psi-mi:MI:0007(anti tag coimmunoprecipitation)
P62993	P00533	GRB2	EGFR	psi-mi:MI:0007(anti tag coimmunoprecipitation)
P62993	P00533	GRB2	EGFR	psi-mi:MI:0007(anti tag coimmunoprecipitation)
P62993	P00533	GRB2	EGFR	psi-mi:MI:0019(coimmunoprecipitation)
P62993	P00533	GRB2	EGFR	psi-mi:MI:0019(coimmunoprecipitation)
P62993	P00533	GRB2	EGFR	psi-mi:MI:0019(coimmunoprecipitation)
P62993	P00533	GRB2	EGFR	psi-mi:MI:0096(pull down)
P62993	P00533	GRB2	EGFR	psi-mi:MI:0096(pull down)
P62993	P00533	GRB2	EGFR	psi-mi:MI:0096(pull down)
P62993	P00533	GRB2	EGFR	psi-mi:MI:0107(surface plasmon resonance)
P62993	P00533	GRB2	EGFR	psi-mi:MI:0676(tandem affinity purification)
P62993	P00533	GRB2	EGFR	psi-mi:MI:0676(tandem affinity purification)
P62993	P11142	GRB2	HSPA8	psi-mi:MI:0096(pull down)
P62993	Q5JSH3	GRB2	WDR44	psi-mi:MI:0007(anti tag coimmunoprecipitation)
P54257	P42858	HAP1	HTT	psi-mi:MI:0006(anti bait coimmunoprecipitation)
P54257	P42858	HAP1	HTT	psi-mi:MI:0096(pull down)
P69905	P30480	HBA1	HLA-B	psi-mi:MI:0006(anti bait coimmunoprecipitation)
Q13547	Q9H9E3	HDAC1	COG4	psi-mi:MI:0007(anti tag coimmunoprecipitation)
Q13547	Q9H9E3	HDAC1	COG4	psi-mi:MI:0007(anti tag coimmunoprecipitation)
P30480	O00299	HLA-B	CLIC1	psi-mi:MI:0006(anti bait coimmunoprecipitation)
P30480	P54578	HLA-B	USP14	psi-mi:MI:0006(anti bait coimmunoprecipitation)
P01893	P11142	HLA-H	HSPA8	psi-mi:MI:0077(nuclear magnetic resonance)
P07900	P11142	HSP90AA1	HSPA8	psi-mi:MI:0007(anti tag coimmunoprecipitation)
P07900	P11142	HSP90AA1	HSPA8	psi-mi:MI:0676(tandem affinity purification)
P0DMV8	P69905	HSPA1A	HBA1	psi-mi:MI:0006(anti bait coimmunoprecipitation)
P11142	Q12933	HSPA8	TRAF2	psi-mi:MI:0676(tandem affinity purification)
P11142	P11142	HSPA8	HSPA8	psi-mi:MI:0096(pull down)
P11142	P11142	HSPA8	HSPA8	psi-mi:MI:0096(pull down)
P11142	Q9NQ11	HSPA8	ATP13A2	psi-mi:MI:0007(anti tag coimmunoprecipitation)
P11142	P63104	HSPA8	YWHAZ	psi-mi:MI:0096(pull down)
P11142	P09497	HSPA8	CLTB	psi-mi:MI:0096(pull down)
P11142	P09496	HSPA8	CLTA	psi-mi:MI:0096(pull down)
P11142	Q00610	HSPA8	CLTC	psi-mi:MI:0096(pull down)
P11142	O43353	HSPA8	RIPK2	psi-mi:MI:0676(tandem affinity purification)
P11142	Q92598	HSPA8	HSPH1	psi-mi:MI:0096(pull down)
P42858	Q99963	HTT	SH3GL3	psi-mi:MI:0077(nuclear magnetic resonance)
P42858	Q99963	HTT	SH3GL3	psi-mi:MI:0096(pull down)
P42858	P45880	HTT	VDAC2	psi-mi:MI:0096(pull down)
P42858	O00291	HTT	HIP1	psi-mi:MI:0007(anti tag coimmunoprecipitation)
P42858	P54257	HTT	HAP1	psi-mi:MI:0007(anti tag coimmunoprecipitation)
P42858	P54257	HTT	HAP1	psi-mi:MI:0096(pull down)
P42858	Q16623	HTT	STX1A	psi-mi:MI:0096(pull down)
P42858	Q8IUH5	HTT	ZDHHC17	psi-mi:MI:0415(enzymatic study)
P42858	P09429	HTT	HMGB1	psi-mi:MI:0007(anti tag coimmunoprecipitation)
P42858	P09429	HTT	HMGB1	psi-mi:MI:0007(anti tag coimmunoprecipitation)
P42858	P09429	HTT	HMGB1	psi-mi:MI:0007(anti tag coimmunoprecipitation)
P42858	P09429	HTT	HMGB1	psi-mi:MI:0007(anti tag coimmunoprecipitation)
P42858	P22748	HTT	CA4	psi-mi:MI:0096(pull down)
P42858	P04156	HTT	PRNP	psi-mi:MI:0096(pull down)
P42858	P13987	HTT	CD59	psi-mi:MI:0096(pull down)
P42858	Q9H1Y0	HTT	ATG5	psi-mi:MI:0007(anti tag coimmunoprecipitation)
P42858	Q9H1Y0	HTT	ATG5	psi-mi:MI:0007(anti tag coimmunoprecipitation)
P42858	Q9H1Y0	HTT	ATG5	psi-mi:MI:0007(anti tag coimmunoprecipitation)
P42858	O94817	HTT	ATG12	psi-mi:MI:0007(anti tag coimmunoprecipitation)
P42858	Q9GZQ8	HTT	MAP1LC3B	psi-mi:MI:0007(anti tag coimmunoprecipitation)
P42858	Q9GZQ8	HTT	MAP1LC3B	psi-mi:MI:0007(anti tag coimmunoprecipitation)
P42858	Q9GZQ8	HTT	MAP1LC3B	psi-mi:MI:0007(anti tag coimmunoprecipitation)
P42858	P42858	HTT	HTT	psi-mi:MI:0007(anti tag coimmunoprecipitation)
P42858	P42858	HTT	HTT	psi-mi:MI:0007(anti tag coimmunoprecipitation)
P42858	P42858	HTT	HTT	psi-mi:MI:0007(anti tag coimmunoprecipitation)
P42858	P42858	HTT	HTT	psi-mi:MI:0007(anti tag coimmunoprecipitation)
P42858	Q8N9I0	HTT	SYT2	psi-mi:MI:0096(pull down)
P42858	P61266	HTT	STX1B	psi-mi:MI:0096(pull down)
P42858	P62491	HTT	RAB11A	psi-mi:MI:0006(anti bait coimmunoprecipitation)
P42858	P62491	HTT	RAB11A	psi-mi:MI:0006(anti bait coimmunoprecipitation)
P42858	P61764	HTT	STXBP1	psi-mi:MI:0096(pull down)
P42858	Q99689	HTT	FEZ1	psi-mi:MI:0096(pull down)
P42858	Q9BY11	HTT	PACSIN1	psi-mi:MI:0096(pull down)
P42858	P51674	HTT	GPM6A	psi-mi:MI:0096(pull down)
P42858	P62873	HTT	GNB1	psi-mi:MI:0096(pull down)
P42858	P62879	HTT	GNB2	psi-mi:MI:0096(pull down)
P42858	P60880	HTT	SNAP25	psi-mi:MI:0096(pull down)
P42858	P80723	HTT	BASP1	psi-mi:MI:0096(pull down)
P42858	P80723	HTT	BASP1	psi-mi:MI:0096(pull down)
P42858	P08247	HTT	SYP	psi-mi:MI:0096(pull down)
P42858	P63000	HTT	RAC1	psi-mi:MI:0096(pull down)
P42858	P31948	HTT	STIP1	psi-mi:MI:0096(pull down)
P42858	Q00610	HTT	CLTC	psi-mi:MI:0096(pull down)
P42858	Q00610	HTT	CLTC	psi-mi:MI:0096(pull down)
P42858	P51572	HTT	BCAP31	psi-mi:MI:0096(pull down)
Q13352	Q8WTW3	ITGB3BP	COG1	psi-mi:MI:0007(anti tag coimmunoprecipitation)
Q13352	Q8WTW3	ITGB3BP	COG1	psi-mi:MI:0007(anti tag coimmunoprecipitation)
P05412	Q9Y2V7	JUN	COG6	psi-mi:MI:0006(anti bait coimmunoprecipitation)
P05412	Q9Y2V7	JUN	COG6	psi-mi:MI:0006(anti bait coimmunoprecipitation)
Q92845	Q8IWJ2	KIFAP3	GCC2	psi-mi:MI:0007(anti tag coimmunoprecipitation)
Q07866	Q7L804	KLC1	RAB11FIP2	psi-mi:MI:0007(anti tag coimmunoprecipitation)
Q07866	Q6WKZ4	KLC1	RAB11FIP1	psi-mi:MI:0007(anti tag coimmunoprecipitation)
Q8NG31	O95229	KNL1	ZWINT	psi-mi:MI:0007(anti tag coimmunoprecipitation)
P13473	Q5S007	LAMP2	LRRK2	psi-mi:MI:0007(anti tag coimmunoprecipitation)
Q86WU2	O43264	LDHD	ZW10	psi-mi:MI:0007(anti tag coimmunoprecipitation)
Q86WU2	O43264	LDHD	ZW10	psi-mi:MI:0007(anti tag coimmunoprecipitation)
Q15334	P42858	LLGL1	HTT	psi-mi:MI:0007(anti tag coimmunoprecipitation)
Q5S007	P63261	LRRK2	ACTG1	psi-mi:MI:0676(tandem affinity purification)
Q5S007	O14641	LRRK2	DVL2	psi-mi:MI:0007(anti tag coimmunoprecipitation)
Q5S007	O60260	LRRK2	PRKN	psi-mi:MI:0007(anti tag coimmunoprecipitation)
Q5S007	Q5S007	LRRK2	LRRK2	psi-mi:MI:0004(affinity chromatography technology)
Q5S007	Q5S007	LRRK2	LRRK2	psi-mi:MI:0004(affinity chromatography technology)
Q5S007	Q5S007	LRRK2	LRRK2	psi-mi:MI:0007(anti tag coimmunoprecipitation)
Q5S007	Q5S007	LRRK2	LRRK2	psi-mi:MI:0007(anti tag coimmunoprecipitation)
Q5S007	Q5S007	LRRK2	LRRK2	psi-mi:MI:0007(anti tag coimmunoprecipitation)
Q5S007	Q5S007	LRRK2	LRRK2	psi-mi:MI:0007(anti tag coimmunoprecipitation)
Q5S007	Q5S007	LRRK2	LRRK2	psi-mi:MI:0007(anti tag coimmunoprecipitation)
Q5S007	Q5S007	LRRK2	LRRK2	psi-mi:MI:0007(anti tag coimmunoprecipitation)
Q5S007	Q5S007	LRRK2	LRRK2	psi-mi:MI:0007(anti tag coimmunoprecipitation)
Q5S007	Q5S007	LRRK2	LRRK2	psi-mi:MI:0007(anti tag coimmunoprecipitation)
Q5S007	Q5S007	LRRK2	LRRK2	psi-mi:MI:0007(anti tag coimmunoprecipitation)
Q5S007	Q5S007	LRRK2	LRRK2	psi-mi:MI:0007(anti tag coimmunoprecipitation)
Q5S007	Q5S007	LRRK2	LRRK2	psi-mi:MI:0007(anti tag coimmunoprecipitation)
Q5S007	Q5S007	LRRK2	LRRK2	psi-mi:MI:0007(anti tag coimmunoprecipitation)
Q5S007	Q5S007	LRRK2	LRRK2	psi-mi:MI:0007(anti tag coimmunoprecipitation)
Q5S007	Q5S007	LRRK2	LRRK2	psi-mi:MI:0007(anti tag coimmunoprecipitation)
Q5S007	Q5S007	LRRK2	LRRK2	psi-mi:MI:0007(anti tag coimmunoprecipitation)
Q5S007	Q5S007	LRRK2	LRRK2	psi-mi:MI:0007(anti tag coimmunoprecipitation)
Q5S007	Q5S007	LRRK2	LRRK2	psi-mi:MI:0007(anti tag coimmunoprecipitation)
Q5S007	Q5S007	LRRK2	LRRK2	psi-mi:MI:0007(anti tag coimmunoprecipitation)
Q5S007	Q5S007	LRRK2	LRRK2	psi-mi:MI:0007(anti tag coimmunoprecipitation)
Q5S007	Q5S007	LRRK2	LRRK2	psi-mi:MI:0007(anti tag coimmunoprecipitation)
Q5S007	Q5S007	LRRK2	LRRK2	psi-mi:MI:0007(anti tag coimmunoprecipitation)
Q5S007	Q5S007	LRRK2	LRRK2	psi-mi:MI:0007(anti tag coimmunoprecipitation)
Q5S007	Q5S007	LRRK2	LRRK2	psi-mi:MI:0007(anti tag coimmunoprecipitation)
Q5S007	Q5S007	LRRK2	LRRK2	psi-mi:MI:0007(anti tag coimmunoprecipitation)
Q5S007	Q5S007	LRRK2	LRRK2	psi-mi:MI:0007(anti tag coimmunoprecipitation)
Q5S007	Q5S007	LRRK2	LRRK2	psi-mi:MI:0007(anti tag coimmunoprecipitation)
Q5S007	Q5S007	LRRK2	LRRK2	psi-mi:MI:0007(anti tag coimmunoprecipitation)
Q5S007	Q5S007	LRRK2	LRRK2	psi-mi:MI:0007(anti tag coimmunoprecipitation)
Q5S007	Q5S007	LRRK2	LRRK2	psi-mi:MI:0007(anti tag coimmunoprecipitation)
Q5S007	Q5S007	LRRK2	LRRK2	psi-mi:MI:0007(anti tag coimmunoprecipitation)
Q5S007	Q5S007	LRRK2	LRRK2	psi-mi:MI:0007(anti tag coimmunoprecipitation)
Q5S007	Q5S007	LRRK2	LRRK2	psi-mi:MI:0007(anti tag coimmunoprecipitation)
Q5S007	Q5S007	LRRK2	LRRK2	psi-mi:MI:0096(pull down)
Q5S007	Q5S007	LRRK2	LRRK2	psi-mi:MI:0096(pull down)
Q5S007	Q5S007	LRRK2	LRRK2	psi-mi:MI:0096(pull down)
Q5S007	Q5S007	LRRK2	LRRK2	psi-mi:MI:0096(pull down)
Q5S007	Q5S007	LRRK2	LRRK2	psi-mi:MI:0096(pull down)
Q5S007	Q5S007	LRRK2	LRRK2	psi-mi:MI:0096(pull down)
Q5S007	Q5S007	LRRK2	LRRK2	psi-mi:MI:0096(pull down)
Q5S007	Q5S007	LRRK2	LRRK2	psi-mi:MI:0096(pull down)
Q5S007	Q5S007	LRRK2	LRRK2	psi-mi:MI:0096(pull down)
Q5S007	Q5S007	LRRK2	LRRK2	psi-mi:MI:0096(pull down)
Q5S007	Q5S007	LRRK2	LRRK2	psi-mi:MI:0096(pull down)
Q5S007	Q5S007	LRRK2	LRRK2	psi-mi:MI:0096(pull down)
Q5S007	Q5S007	LRRK2	LRRK2	psi-mi:MI:0114(x-ray crystallography)
Q5S007	Q5S007	LRRK2	LRRK2	psi-mi:MI:0114(x-ray crystallography)
Q5S007	Q5S007	LRRK2	LRRK2	psi-mi:MI:0424(protein kinase assay)
Q5S007	Q5S007	LRRK2	LRRK2	psi-mi:MI:0424(protein kinase assay)
Q5S007	Q5S007	LRRK2	LRRK2	psi-mi:MI:0424(protein kinase assay)
Q5S007	Q5S007	LRRK2	LRRK2	psi-mi:MI:0424(protein kinase assay)
Q5S007	Q5S007	LRRK2	LRRK2	psi-mi:MI:0424(protein kinase assay)
Q5S007	Q5S007	LRRK2	LRRK2	psi-mi:MI:0424(protein kinase assay)
Q5S007	Q5S007	LRRK2	LRRK2	psi-mi:MI:0424(protein kinase assay)
Q5S007	Q5S007	LRRK2	LRRK2	psi-mi:MI:0424(protein kinase assay)
Q5S007	Q5S007	LRRK2	LRRK2	psi-mi:MI:0424(protein kinase assay)
Q5S007	Q5S007	LRRK2	LRRK2	psi-mi:MI:0424(protein kinase assay)
Q5S007	Q5S007	LRRK2	LRRK2	psi-mi:MI:0424(protein kinase assay)
Q5S007	Q5S007	LRRK2	LRRK2	psi-mi:MI:0424(protein kinase assay)
Q5S007	Q5S007	LRRK2	LRRK2	psi-mi:MI:0424(protein kinase assay)
Q5S007	Q5S007	LRRK2	LRRK2	psi-mi:MI:0424(protein kinase assay)
Q5S007	Q5S007	LRRK2	LRRK2	psi-mi:MI:0424(protein kinase assay)
Q5S007	Q5S007	LRRK2	LRRK2	psi-mi:MI:0424(protein kinase assay)
Q5S007	P61020	LRRK2	RAB5B	psi-mi:MI:0006(anti bait coimmunoprecipitation)
Q5S007	P61020	LRRK2	RAB5B	psi-mi:MI:0424(protein kinase assay)
Q5S007	O75843	LRRK2	AP1G2	psi-mi:MI:0676(tandem affinity purification)
Q5S007	Q96CW1	LRRK2	AP2M1	psi-mi:MI:0676(tandem affinity purification)
Q5S007	O00203	LRRK2	AP3B1	psi-mi:MI:0676(tandem affinity purification)
Q5S007	O94832	LRRK2	MYO1D	psi-mi:MI:0676(tandem affinity purification)
Q5S007	P16615	LRRK2	ATP2A2	psi-mi:MI:0676(tandem affinity purification)
Q5S007	P61586	LRRK2	RHOA	psi-mi:MI:0007(anti tag coimmunoprecipitation)
Q5S007	P26038	LRRK2	MSN	psi-mi:MI:0424(protein kinase assay)
Q5S007	P26038	LRRK2	MSN	psi-mi:MI:0424(protein kinase assay)
Q5S007	P26038	LRRK2	MSN	psi-mi:MI:0424(protein kinase assay)
Q5S007	P26038	LRRK2	MSN	psi-mi:MI:0424(protein kinase assay)
Q5S007	P26038	LRRK2	MSN	psi-mi:MI:0424(protein kinase assay)
Q5S007	P26038	LRRK2	MSN	psi-mi:MI:0424(protein kinase assay)
Q5S007	P26038	LRRK2	MSN	psi-mi:MI:0424(protein kinase assay)
Q5S007	P26038	LRRK2	MSN	psi-mi:MI:0424(protein kinase assay)
Q5S007	P26038	LRRK2	MSN	psi-mi:MI:0424(protein kinase assay)
Q5S007	P11142	LRRK2	HSPA8	psi-mi:MI:0007(anti tag coimmunoprecipitation)
Q5S007	P11142	LRRK2	HSPA8	psi-mi:MI:0007(anti tag coimmunoprecipitation)
Q5S007	P11142	LRRK2	HSPA8	psi-mi:MI:0007(anti tag coimmunoprecipitation)
Q5S007	P11142	LRRK2	HSPA8	psi-mi:MI:0007(anti tag coimmunoprecipitation)
Q5S007	P11142	LRRK2	HSPA8	psi-mi:MI:0007(anti tag coimmunoprecipitation)
Q5S007	P11142	LRRK2	HSPA8	psi-mi:MI:0007(anti tag coimmunoprecipitation)
Q5S007	P11142	LRRK2	HSPA8	psi-mi:MI:0007(anti tag coimmunoprecipitation)
Q5S007	P11142	LRRK2	HSPA8	psi-mi:MI:0007(anti tag coimmunoprecipitation)
Q5S007	P11142	LRRK2	HSPA8	psi-mi:MI:0007(anti tag coimmunoprecipitation)
Q5S007	P11142	LRRK2	HSPA8	psi-mi:MI:0007(anti tag coimmunoprecipitation)
Q5S007	Q6IQ22	LRRK2	RAB12	psi-mi:MI:0007(anti tag coimmunoprecipitation)
Q5S007	Q6IQ22	LRRK2	RAB12	psi-mi:MI:0007(anti tag coimmunoprecipitation)
Q5S007	O95295	LRRK2	SNAPIN	psi-mi:MI:0096(pull down)
Q5S007	P07900	LRRK2	HSP90AA1	psi-mi:MI:0007(anti tag coimmunoprecipitation)
Q5S007	P07900	LRRK2	HSP90AA1	psi-mi:MI:0007(anti tag coimmunoprecipitation)
Q5S007	P07900	LRRK2	HSP90AA1	psi-mi:MI:0007(anti tag coimmunoprecipitation)
Q5S007	P07900	LRRK2	HSP90AA1	psi-mi:MI:0007(anti tag coimmunoprecipitation)
Q5S007	P07900	LRRK2	HSP90AA1	psi-mi:MI:0007(anti tag coimmunoprecipitation)
Q5S007	Q99962	LRRK2	SH3GL2	psi-mi:MI:0424(protein kinase assay)
Q5S007	O00159	LRRK2	MYO1C	psi-mi:MI:0676(tandem affinity purification)
Q5S007	P63104	LRRK2	YWHAZ	psi-mi:MI:0007(anti tag coimmunoprecipitation)
Q5S007	P63104	LRRK2	YWHAZ	psi-mi:MI:0007(anti tag coimmunoprecipitation)
Q5S007	P63104	LRRK2	YWHAZ	psi-mi:MI:0007(anti tag coimmunoprecipitation)
Q5S007	P63104	LRRK2	YWHAZ	psi-mi:MI:0107(surface plasmon resonance)
Q5S007	O00429	LRRK2	DNM1L	psi-mi:MI:0006(anti bait coimmunoprecipitation)
Q5S007	O00429	LRRK2	DNM1L	psi-mi:MI:0006(anti bait coimmunoprecipitation)
Q5S007	O00429	LRRK2	DNM1L	psi-mi:MI:0006(anti bait coimmunoprecipitation)
Q5S007	O00429	LRRK2	DNM1L	psi-mi:MI:0006(anti bait coimmunoprecipitation)
Q5S007	O00429	LRRK2	DNM1L	psi-mi:MI:0007(anti tag coimmunoprecipitation)
Q5S007	O00429	LRRK2	DNM1L	psi-mi:MI:0424(protein kinase assay)
Q5S007	P60660	LRRK2	MYL6	psi-mi:MI:0676(tandem affinity purification)
Q5S007	O75581	LRRK2	LRP6	psi-mi:MI:0007(anti tag coimmunoprecipitation)
Q5S007	Q14980	LRRK2	NUMA1	psi-mi:MI:0007(anti tag coimmunoprecipitation)
Q5S007	P60953	LRRK2	CDC42	psi-mi:MI:0007(anti tag coimmunoprecipitation)
Q5S007	P08670	LRRK2	VIM	psi-mi:MI:0007(anti tag coimmunoprecipitation)
Q5S007	P61026	LRRK2	RAB10	psi-mi:MI:0007(anti tag coimmunoprecipitation)
Q5S007	P61026	LRRK2	RAB10	psi-mi:MI:0007(anti tag coimmunoprecipitation)
Q5S007	P31749	LRRK2	AKT1	psi-mi:MI:0096(pull down)
Q5S007	P31749	LRRK2	AKT1	psi-mi:MI:0096(pull down)
Q5S007	P31749	LRRK2	AKT1	psi-mi:MI:0424(protein kinase assay)
Q5S007	P31749	LRRK2	AKT1	psi-mi:MI:0424(protein kinase assay)
Q5S007	P48730	LRRK2	CSNK1D	psi-mi:MI:0424(protein kinase assay)
Q5S007	P14618	LRRK2	PKM	psi-mi:MI:0676(tandem affinity purification)
Q5S007	O14966	LRRK2	RAB29	psi-mi:MI:0007(anti tag coimmunoprecipitation)
Q5S007	O14966	LRRK2	RAB29	psi-mi:MI:0007(anti tag coimmunoprecipitation)
Q5S007	O14966	LRRK2	RAB29	psi-mi:MI:0007(anti tag coimmunoprecipitation)
Q5S007	O14966	LRRK2	RAB29	psi-mi:MI:0007(anti tag coimmunoprecipitation)
Q5S007	Q8WVM8	LRRK2	SCFD1	psi-mi:MI:0007(anti tag coimmunoprecipitation)
Q5S007	Q8WVM8	LRRK2	SCFD1	psi-mi:MI:0007(anti tag coimmunoprecipitation)
Q5S007	Q00610	LRRK2	CLTC	psi-mi:MI:0007(anti tag coimmunoprecipitation)
Q5S007	O43823	LRRK2	AKAP8	psi-mi:MI:0007(anti tag coimmunoprecipitation)
Q5S007	Q9UBF2	LRRK2	COPG2	psi-mi:MI:0676(tandem affinity purification)
Q5S007	O14579	LRRK2	COPE	psi-mi:MI:0676(tandem affinity purification)
Q5S007	Q13555	LRRK2	CAMK2G	psi-mi:MI:0676(tandem affinity purification)
Q5S007	O14976	LRRK2	GAK	psi-mi:MI:0007(anti tag coimmunoprecipitation)
Q5S007	O14976	LRRK2	GAK	psi-mi:MI:0007(anti tag coimmunoprecipitation)
Q5S007	Q9BQE3	LRRK2	TUBA1C	psi-mi:MI:0096(pull down)
Q5S007	O15240	LRRK2	VGF	psi-mi:MI:0007(anti tag coimmunoprecipitation)
Q5S007	Q13637	LRRK2	RAB32	psi-mi:MI:0006(anti bait coimmunoprecipitation)
Q5S007	O15027	LRRK2	SEC16A	psi-mi:MI:0007(anti tag coimmunoprecipitation)
Q5S007	Q8N6T3	LRRK2	ARFGAP1	psi-mi:MI:0424(protein kinase assay)
Q5S007	Q8N6T3	LRRK2	ARFGAP1	psi-mi:MI:0424(protein kinase assay)
Q5S007	Q8N6T3	LRRK2	ARFGAP1	psi-mi:MI:0424(protein kinase assay)
Q5S007	Q8N6T3	LRRK2	ARFGAP1	psi-mi:MI:0424(protein kinase assay)
Q5S007	Q9NXS2	LRRK2	QPCTL	psi-mi:MI:0007(anti tag coimmunoprecipitation)
P07948	P00533	LYN	EGFR	psi-mi:MI:0006(anti bait coimmunoprecipitation)
Q9GZQ8	P11142	MAP1LC3B	HSPA8	psi-mi:MI:0007(anti tag coimmunoprecipitation)
Q9BXW4	Q8NEB9	MAP1LC3C	PIK3C3	psi-mi:MI:0007(anti tag coimmunoprecipitation)
Q02750	P30480	MAP2K1	HLA-B	psi-mi:MI:0006(anti bait coimmunoprecipitation)
P28482	P30480	MAPK1	HLA-B	psi-mi:MI:0006(anti bait coimmunoprecipitation)
P27361	P42858	MAPK3	HTT	psi-mi:MI:0007(anti tag coimmunoprecipitation)
Q15691	P30480	MAPRE1	HLA-B	psi-mi:MI:0006(anti bait coimmunoprecipitation)
P10636	O43264	MAPT	ZW10	psi-mi:MI:0006(anti bait coimmunoprecipitation)
P10636	O43264	MAPT	ZW10	psi-mi:MI:0006(anti bait coimmunoprecipitation)
P14174	P30480	MIF	HLA-B	psi-mi:MI:0006(anti bait coimmunoprecipitation)
Q9H081	O95229	MIS12	ZWINT	psi-mi:MI:0007(anti tag coimmunoprecipitation)
Q9H081	O95229	MIS12	ZWINT	psi-mi:MI:0676(tandem affinity purification)
Q9H081	O95229	MIS12	ZWINT	psi-mi:MI:0676(tandem affinity purification)
P46013	O43264	MKI67	ZW10	psi-mi:MI:0007(anti tag coimmunoprecipitation)
P46013	O43264	MKI67	ZW10	psi-mi:MI:0007(anti tag coimmunoprecipitation)
P08473	P11142	MME	HSPA8	psi-mi:MI:0006(anti bait coimmunoprecipitation)
Q8N4V1	Q9BTV4	MMGT1	TMEM43	psi-mi:MI:0007(anti tag coimmunoprecipitation)
P26038	Q5S007	MSN	LRRK2	psi-mi:MI:0424(protein kinase assay)
P26038	Q5S007	MSN	LRRK2	psi-mi:MI:0424(protein kinase assay)
P26038	Q5S007	MSN	LRRK2	psi-mi:MI:0424(protein kinase assay)
P26038	Q5S007	MSN	LRRK2	psi-mi:MI:0424(protein kinase assay)
P26038	Q5S007	MSN	LRRK2	psi-mi:MI:0424(protein kinase assay)
P26038	Q5S007	MSN	LRRK2	psi-mi:MI:0424(protein kinase assay)
P26038	Q5S007	MSN	LRRK2	psi-mi:MI:0424(protein kinase assay)
P26038	Q5S007	MSN	LRRK2	psi-mi:MI:0424(protein kinase assay)
P26038	P30480	MSN	HLA-B	psi-mi:MI:0006(anti bait coimmunoprecipitation)
P15941	P00533	MUC1	EGFR	psi-mi:MI:0019(coimmunoprecipitation)
P60660	P30480	MYL6	HLA-B	psi-mi:MI:0006(anti bait coimmunoprecipitation)
A2RRP1	O43264	NBAS	ZW10	psi-mi:MI:0006(anti bait coimmunoprecipitation)
A2RRP1	O43264	NBAS	ZW10	psi-mi:MI:0006(anti bait coimmunoprecipitation)
A2RRP1	O43264	NBAS	ZW10	psi-mi:MI:0006(anti bait coimmunoprecipitation)
A2RRP1	O43264	NBAS	ZW10	psi-mi:MI:0006(anti bait coimmunoprecipitation)
A2RRP1	O43264	NBAS	ZW10	psi-mi:MI:0007(anti tag coimmunoprecipitation)
A2RRP1	O43264	NBAS	ZW10	psi-mi:MI:0007(anti tag coimmunoprecipitation)
A2RRP1	O43264	NBAS	ZW10	psi-mi:MI:0007(anti tag coimmunoprecipitation)
A2RRP1	O43264	NBAS	ZW10	psi-mi:MI:0007(anti tag coimmunoprecipitation)
A2RRP1	O43264	NBAS	ZW10	psi-mi:MI:0007(anti tag coimmunoprecipitation)
A2RRP1	O43264	NBAS	ZW10	psi-mi:MI:0007(anti tag coimmunoprecipitation)
P19878	P11142	NCF2	HSPA8	psi-mi:MI:0007(anti tag coimmunoprecipitation)
O14777	O95229	NDC80	ZWINT	psi-mi:MI:0006(anti bait coimmunoprecipitation)
O14777	O95229	NDC80	ZWINT	psi-mi:MI:0006(anti bait coimmunoprecipitation)
O14777	O95229	NDC80	ZWINT	psi-mi:MI:0096(pull down)
O14777	O95229	NDC80	ZWINT	psi-mi:MI:0096(pull down)
O14777	O43264	NDC80	ZW10	psi-mi:MI:0006(anti bait coimmunoprecipitation)
O14777	O43264	NDC80	ZW10	psi-mi:MI:0006(anti bait coimmunoprecipitation)
O14777	O43264	NDC80	ZW10	psi-mi:MI:0096(pull down)
O14777	O43264	NDC80	ZW10	psi-mi:MI:0096(pull down)
P46934	P00533	NEDD4	EGFR	psi-mi:MI:0006(anti bait coimmunoprecipitation)
P46934	P00533	NEDD4	EGFR	psi-mi:MI:0006(anti bait coimmunoprecipitation)
P46934	Q9H0R8	NEDD4	GABARAPL1	psi-mi:MI:0096(pull down)
Q96F24	Q8NEB9	NRBF2	PIK3C3	psi-mi:MI:0006(anti bait coimmunoprecipitation)
Q96F24	Q8NEB9	NRBF2	PIK3C3	psi-mi:MI:0007(anti tag coimmunoprecipitation)
Q96F24	Q8NEB9	NRBF2	PIK3C3	psi-mi:MI:0007(anti tag coimmunoprecipitation)
Q96F24	Q8NEB9	NRBF2	PIK3C3	psi-mi:MI:0096(pull down)
Q96F24	Q6ZNE5	NRBF2	ATG14	psi-mi:MI:0006(anti bait coimmunoprecipitation)
Q96F24	Q6ZNE5	NRBF2	ATG14	psi-mi:MI:0007(anti tag coimmunoprecipitation)
Q96F24	Q6ZNE5	NRBF2	ATG14	psi-mi:MI:0096(pull down)
Q96F24	Q14457	NRBF2	BECN1	psi-mi:MI:0006(anti bait coimmunoprecipitation)
Q96F24	Q14457	NRBF2	BECN1	psi-mi:MI:0007(anti tag coimmunoprecipitation)
Q96F24	Q14457	NRBF2	BECN1	psi-mi:MI:0096(pull down)
P46459	Q8WVM8	NSF	SCFD1	psi-mi:MI:0007(anti tag coimmunoprecipitation)
Q9BZD4	O95229	NUF2	ZWINT	psi-mi:MI:0007(anti tag coimmunoprecipitation)
Q01968	Q12965	OCRL	MYO1E	psi-mi:MI:0007(anti tag coimmunoprecipitation)
Q01968	P20339	OCRL	RAB5A	psi-mi:MI:0007(anti tag coimmunoprecipitation)
Q01968	P20339	OCRL	RAB5A	psi-mi:MI:0096(pull down)
Q01968	P20339	OCRL	RAB5A	psi-mi:MI:0096(pull down)
Q01968	P20339	OCRL	RAB5A	psi-mi:MI:0096(pull down)
Q01968	P20339	OCRL	RAB5A	psi-mi:MI:0411(enzyme linked immunosorbent assay)
Q01968	P60709	OCRL	ACTB	psi-mi:MI:0007(anti tag coimmunoprecipitation)
Q01968	P63261	OCRL	ACTG1	psi-mi:MI:0007(anti tag coimmunoprecipitation)
Q01968	P07947	OCRL	YES1	psi-mi:MI:0007(anti tag coimmunoprecipitation)
Q01968	Q07912	OCRL	TNK2	psi-mi:MI:0007(anti tag coimmunoprecipitation)
Q01968	P51148	OCRL	RAB5C	psi-mi:MI:0007(anti tag coimmunoprecipitation)
Q01968	P51148	OCRL	RAB5C	psi-mi:MI:0007(anti tag coimmunoprecipitation)
Q01968	P61020	OCRL	RAB5B	psi-mi:MI:0007(anti tag coimmunoprecipitation)
Q01968	O43747	OCRL	AP1G1	psi-mi:MI:0007(anti tag coimmunoprecipitation)
Q01968	O95782	OCRL	AP2A1	psi-mi:MI:0007(anti tag coimmunoprecipitation)
Q01968	O95782	OCRL	AP2A1	psi-mi:MI:0007(anti tag coimmunoprecipitation)
Q01968	O94973	OCRL	AP2A2	psi-mi:MI:0007(anti tag coimmunoprecipitation)
Q01968	Q96CW1	OCRL	AP2M1	psi-mi:MI:0007(anti tag coimmunoprecipitation)
Q01968	Q96CW1	OCRL	AP2M1	psi-mi:MI:0007(anti tag coimmunoprecipitation)
Q01968	P63010	OCRL	AP2B1	psi-mi:MI:0007(anti tag coimmunoprecipitation)
Q01968	P49757	OCRL	NUMB	psi-mi:MI:0007(anti tag coimmunoprecipitation)
Q01968	Q7Z3C6	OCRL	ATG9A	psi-mi:MI:0007(anti tag coimmunoprecipitation)
Q01968	P51149	OCRL	RAB7A	psi-mi:MI:0007(anti tag coimmunoprecipitation)
Q01968	P62491	OCRL	RAB11A	psi-mi:MI:0007(anti tag coimmunoprecipitation)
Q01968	P62491	OCRL	RAB11A	psi-mi:MI:0007(anti tag coimmunoprecipitation)
Q01968	P07900	OCRL	HSP90AA1	psi-mi:MI:0007(anti tag coimmunoprecipitation)
Q01968	P15291	OCRL	B4GALT1	psi-mi:MI:0007(anti tag coimmunoprecipitation)
Q01968	O15260	OCRL	SURF4	psi-mi:MI:0007(anti tag coimmunoprecipitation)
Q01968	O00159	OCRL	MYO1C	psi-mi:MI:0007(anti tag coimmunoprecipitation)
Q01968	P02786	OCRL	TFRC	psi-mi:MI:0007(anti tag coimmunoprecipitation)
Q01968	O75955	OCRL	FLOT1	psi-mi:MI:0007(anti tag coimmunoprecipitation)
Q01968	P60660	OCRL	MYL6	psi-mi:MI:0007(anti tag coimmunoprecipitation)
Q01968	P0DP25	OCRL	CALM3	psi-mi:MI:0007(anti tag coimmunoprecipitation)
Q01968	P04899	OCRL	GNAI2	psi-mi:MI:0007(anti tag coimmunoprecipitation)
Q01968	P08670	OCRL	VIM	psi-mi:MI:0007(anti tag coimmunoprecipitation)
Q01968	P63000	OCRL	RAC1	psi-mi:MI:0006(anti bait coimmunoprecipitation)
Q01968	P11717	OCRL	IGF2R	psi-mi:MI:0007(anti tag coimmunoprecipitation)
Q01968	P11717	OCRL	IGF2R	psi-mi:MI:0007(anti tag coimmunoprecipitation)
Q01968	P11717	OCRL	IGF2R	psi-mi:MI:0007(anti tag coimmunoprecipitation)
Q01968	Q13492	OCRL	PICALM	psi-mi:MI:0007(anti tag coimmunoprecipitation)
Q01968	P10809	OCRL	HSPD1	psi-mi:MI:0007(anti tag coimmunoprecipitation)
Q01968	P23528	OCRL	CFL1	psi-mi:MI:0007(anti tag coimmunoprecipitation)
Q01968	P61006	OCRL	RAB8A	psi-mi:MI:0096(pull down)
Q01968	P61006	OCRL	RAB8A	psi-mi:MI:0096(pull down)
Q01968	P61006	OCRL	RAB8A	psi-mi:MI:0114(x-ray crystallography)
Q01968	P61006	OCRL	RAB8A	psi-mi:MI:0114(x-ray crystallography)
Q01968	P61006	OCRL	RAB8A	psi-mi:MI:0411(enzyme linked immunosorbent assay)
Q01968	P61006	OCRL	RAB8A	psi-mi:MI:0411(enzyme linked immunosorbent assay)
Q01968	P08754	OCRL	GNAI3	psi-mi:MI:0007(anti tag coimmunoprecipitation)
Q01968	P09497	OCRL	CLTB	psi-mi:MI:0007(anti tag coimmunoprecipitation)
Q01968	P09497	OCRL	CLTB	psi-mi:MI:0007(anti tag coimmunoprecipitation)
Q01968	P14618	OCRL	PKM	psi-mi:MI:0007(anti tag coimmunoprecipitation)
Q01968	P14618	OCRL	PKM	psi-mi:MI:0007(anti tag coimmunoprecipitation)
Q01968	P49755	OCRL	TMED10	psi-mi:MI:0007(anti tag coimmunoprecipitation)
Q01968	Q08379	OCRL	GOLGA2	psi-mi:MI:0007(anti tag coimmunoprecipitation)
Q01968	Q8WVM8	OCRL	SCFD1	psi-mi:MI:0007(anti tag coimmunoprecipitation)
Q01968	Q8WVM8	OCRL	SCFD1	psi-mi:MI:0007(anti tag coimmunoprecipitation)
Q01968	O95249	OCRL	GOSR1	psi-mi:MI:0007(anti tag coimmunoprecipitation)
Q01968	O00461	OCRL	GOLIM4	psi-mi:MI:0007(anti tag coimmunoprecipitation)
Q01968	Q14789	OCRL	GOLGB1	psi-mi:MI:0007(anti tag coimmunoprecipitation)
Q01968	Q10567	OCRL	AP1B1	psi-mi:MI:0007(anti tag coimmunoprecipitation)
Q01968	P09496	OCRL	CLTA	psi-mi:MI:0007(anti tag coimmunoprecipitation)
Q01968	P09496	OCRL	CLTA	psi-mi:MI:0007(anti tag coimmunoprecipitation)
Q01968	Q00610	OCRL	CLTC	psi-mi:MI:0007(anti tag coimmunoprecipitation)
Q01968	Q00610	OCRL	CLTC	psi-mi:MI:0007(anti tag coimmunoprecipitation)
Q01968	Q00610	OCRL	CLTC	psi-mi:MI:0007(anti tag coimmunoprecipitation)
Q01968	Q00610	OCRL	CLTC	psi-mi:MI:0007(anti tag coimmunoprecipitation)
Q01968	Q00610	OCRL	CLTC	psi-mi:MI:0096(pull down)
Q01968	Q00610	OCRL	CLTC	psi-mi:MI:0096(pull down)
Q01968	Q00610	OCRL	CLTC	psi-mi:MI:0107(surface plasmon resonance)
Q01968	P53675	OCRL	CLTCL1	psi-mi:MI:0007(anti tag coimmunoprecipitation)
Q01968	Q9Y5X1	OCRL	SNX9	psi-mi:MI:0007(anti tag coimmunoprecipitation)
Q01968	Q9Y5X1	OCRL	SNX9	psi-mi:MI:0007(anti tag coimmunoprecipitation)
Q01968	Q9Y5X1	OCRL	SNX9	psi-mi:MI:0007(anti tag coimmunoprecipitation)
Q01968	Q9Y5X1	OCRL	SNX9	psi-mi:MI:0007(anti tag coimmunoprecipitation)
Q01968	O00443	OCRL	PIK3C2A	psi-mi:MI:0007(anti tag coimmunoprecipitation)
Q01968	O00443	OCRL	PIK3C2A	psi-mi:MI:0007(anti tag coimmunoprecipitation)
Q01968	O00443	OCRL	PIK3C2A	psi-mi:MI:0007(anti tag coimmunoprecipitation)
Q01968	Q6ICB4	OCRL	PHETA2	psi-mi:MI:0007(anti tag coimmunoprecipitation)
Q01968	Q6ICB4	OCRL	PHETA2	psi-mi:MI:0007(anti tag coimmunoprecipitation)
Q01968	Q8N4B1	OCRL	PHETA1	psi-mi:MI:0007(anti tag coimmunoprecipitation)
Q01968	Q8N4B1	OCRL	PHETA1	psi-mi:MI:0007(anti tag coimmunoprecipitation)
Q01968	Q14677	OCRL	CLINT1	psi-mi:MI:0007(anti tag coimmunoprecipitation)
Q01968	Q14677	OCRL	CLINT1	psi-mi:MI:0007(anti tag coimmunoprecipitation)
Q01968	Q14677	OCRL	CLINT1	psi-mi:MI:0007(anti tag coimmunoprecipitation)
Q01968	Q14677	OCRL	CLINT1	psi-mi:MI:0007(anti tag coimmunoprecipitation)
Q01968	Q14677	OCRL	CLINT1	psi-mi:MI:0007(anti tag coimmunoprecipitation)
Q01968	Q14677	OCRL	CLINT1	psi-mi:MI:0007(anti tag coimmunoprecipitation)
Q01968	P55735	OCRL	SEC13	psi-mi:MI:0007(anti tag coimmunoprecipitation)
Q01968	Q9Y3B3	OCRL	TMED7	psi-mi:MI:0007(anti tag coimmunoprecipitation)
Q01968	Q9BVK6	OCRL	TMED9	psi-mi:MI:0007(anti tag coimmunoprecipitation)
Q01968	Q9UKG1	OCRL	APPL1	psi-mi:MI:0096(pull down)
Q01968	O14662	OCRL	STX16	psi-mi:MI:0007(anti tag coimmunoprecipitation)
Q01968	O14976	OCRL	GAK	psi-mi:MI:0007(anti tag coimmunoprecipitation)
Q01968	O14976	OCRL	GAK	psi-mi:MI:0007(anti tag coimmunoprecipitation)
Q01968	Q8IUD2	OCRL	ERC1	psi-mi:MI:0007(anti tag coimmunoprecipitation)
Q01968	Q8IUD2	OCRL	ERC1	psi-mi:MI:0007(anti tag coimmunoprecipitation)
Q01968	P20340	OCRL	RAB6A	psi-mi:MI:0007(anti tag coimmunoprecipitation)
Q01968	P20340	OCRL	RAB6A	psi-mi:MI:0007(anti tag coimmunoprecipitation)
Q01968	P20340	OCRL	RAB6A	psi-mi:MI:0096(pull down)
Q01968	P20340	OCRL	RAB6A	psi-mi:MI:0096(pull down)
Q01968	P20340	OCRL	RAB6A	psi-mi:MI:0096(pull down)
Q01968	P20340	OCRL	RAB6A	psi-mi:MI:0096(pull down)
Q01968	P20340	OCRL	RAB6A	psi-mi:MI:0096(pull down)
Q01968	P20340	OCRL	RAB6A	psi-mi:MI:0096(pull down)
Q01968	P20340	OCRL	RAB6A	psi-mi:MI:0096(pull down)
Q01968	P20340	OCRL	RAB6A	psi-mi:MI:0096(pull down)
Q01968	P20340	OCRL	RAB6A	psi-mi:MI:0096(pull down)
Q01968	P20340	OCRL	RAB6A	psi-mi:MI:0096(pull down)
Q01968	P20340	OCRL	RAB6A	psi-mi:MI:0676(tandem affinity purification)
Q01968	P46459	OCRL	NSF	psi-mi:MI:0007(anti tag coimmunoprecipitation)
Q01968	P61106	OCRL	RAB14	psi-mi:MI:0411(enzyme linked immunosorbent assay)
Q01968	Q9UNK0	OCRL	STX8	psi-mi:MI:0007(anti tag coimmunoprecipitation)
Q01968	P62820	OCRL	RAB1A	psi-mi:MI:0007(anti tag coimmunoprecipitation)
Q01968	P62820	OCRL	RAB1A	psi-mi:MI:0096(pull down)
Q01968	P62820	OCRL	RAB1A	psi-mi:MI:0096(pull down)
Q01968	Q9NW61	OCRL	PLEKHJ1	psi-mi:MI:0007(anti tag coimmunoprecipitation)
Q01968	Q9NW61	OCRL	PLEKHJ1	psi-mi:MI:0007(anti tag coimmunoprecipitation)
Q01968	Q9UEU0	OCRL	VTI1B	psi-mi:MI:0007(anti tag coimmunoprecipitation)
Q01968	O60499	OCRL	STX10	psi-mi:MI:0007(anti tag coimmunoprecipitation)
Q01968	O15027	OCRL	SEC16A	psi-mi:MI:0007(anti tag coimmunoprecipitation)
Q01968	O14653	OCRL	GOSR2	psi-mi:MI:0007(anti tag coimmunoprecipitation)
Q01968	Q9H0U4	OCRL	RAB1B	psi-mi:MI:0007(anti tag coimmunoprecipitation)
Q01968	Q13813	OCRL	SPTAN1	psi-mi:MI:0007(anti tag coimmunoprecipitation)
Q01968	P54920	OCRL	NAPA	psi-mi:MI:0007(anti tag coimmunoprecipitation)
Q01968	O75396	OCRL	SEC22B	psi-mi:MI:0007(anti tag coimmunoprecipitation)
Q01968	Q9Y3E0	OCRL	GOLT1B	psi-mi:MI:0007(anti tag coimmunoprecipitation)
Q01968	Q8NBJ4	OCRL	GOLM1	psi-mi:MI:0007(anti tag coimmunoprecipitation)
Q01968	Q8NBJ4	OCRL	GOLM1	psi-mi:MI:0007(anti tag coimmunoprecipitation)
Q01968	Q10471	OCRL	GALNT2	psi-mi:MI:0007(anti tag coimmunoprecipitation)
Q01968	Q8WUD6	OCRL	CHPT1	psi-mi:MI:0007(anti tag coimmunoprecipitation)
Q01968	Q9NRW7	OCRL	VPS45	psi-mi:MI:0007(anti tag coimmunoprecipitation)
Q01968	Q92896	OCRL	GLG1	psi-mi:MI:0007(anti tag coimmunoprecipitation)
Q01968	P98194	OCRL	ATP2C1	psi-mi:MI:0007(anti tag coimmunoprecipitation)
P41145	Q9H0R8	OPRK1	GABARAPL1	psi-mi:MI:0096(pull down)
Q96CV9	P42858	OPTN	HTT	psi-mi:MI:0096(pull down)
P22061	P30480	PCMT1	HLA-B	psi-mi:MI:0006(anti bait coimmunoprecipitation)
Q8WUM4	Q9H0R8	PDCD6IP	GABARAPL1	psi-mi:MI:0096(pull down)
Q8WUM4	P30480	PDCD6IP	HLA-B	psi-mi:MI:0006(anti bait coimmunoprecipitation)
P16234	Q8WVM8	PDGFRA	SCFD1	psi-mi:MI:0007(anti tag coimmunoprecipitation)
P30086	P30480	PEBP1	HLA-B	psi-mi:MI:0006(anti bait coimmunoprecipitation)
Q13492	O14976	PICALM	GAK	psi-mi:MI:0007(anti tag coimmunoprecipitation)
O00750	P00533	PIK3C2B	EGFR	psi-mi:MI:0007(anti tag coimmunoprecipitation)
O00750	P00533	PIK3C2B	EGFR	psi-mi:MI:0096(pull down)
Q8NEB9	Q8NEB9	PIK3C3	PIK3C3	psi-mi:MI:0007(anti tag coimmunoprecipitation)
Q8NEB9	Q8NEB9	PIK3C3	PIK3C3	psi-mi:MI:0007(anti tag coimmunoprecipitation)
Q8NEB9	Q6ZNE5	PIK3C3	ATG14	psi-mi:MI:0006(anti bait coimmunoprecipitation)
Q8NEB9	Q6ZNE5	PIK3C3	ATG14	psi-mi:MI:0006(anti bait coimmunoprecipitation)
Q8NEB9	Q6ZNE5	PIK3C3	ATG14	psi-mi:MI:0006(anti bait coimmunoprecipitation)
Q8NEB9	Q6ZNE5	PIK3C3	ATG14	psi-mi:MI:0006(anti bait coimmunoprecipitation)
Q8NEB9	Q6ZNE5	PIK3C3	ATG14	psi-mi:MI:0007(anti tag coimmunoprecipitation)
Q8NEB9	Q6ZNE5	PIK3C3	ATG14	psi-mi:MI:0007(anti tag coimmunoprecipitation)
Q8NEB9	Q6ZNE5	PIK3C3	ATG14	psi-mi:MI:0007(anti tag coimmunoprecipitation)
Q8NEB9	Q6ZNE5	PIK3C3	ATG14	psi-mi:MI:0007(anti tag coimmunoprecipitation)
Q8NEB9	Q6ZNE5	PIK3C3	ATG14	psi-mi:MI:0007(anti tag coimmunoprecipitation)
Q8NEB9	Q6ZNE5	PIK3C3	ATG14	psi-mi:MI:0007(anti tag coimmunoprecipitation)
Q8NEB9	Q6ZNE5	PIK3C3	ATG14	psi-mi:MI:0007(anti tag coimmunoprecipitation)
Q8NEB9	Q6ZNE5	PIK3C3	ATG14	psi-mi:MI:0007(anti tag coimmunoprecipitation)
Q8NEB9	Q6ZNE5	PIK3C3	ATG14	psi-mi:MI:0007(anti tag coimmunoprecipitation)
Q8NEB9	Q6ZNE5	PIK3C3	ATG14	psi-mi:MI:0007(anti tag coimmunoprecipitation)
Q8NEB9	Q99570	PIK3C3	PIK3R4	psi-mi:MI:0007(anti tag coimmunoprecipitation)
Q8NEB9	Q99570	PIK3C3	PIK3R4	psi-mi:MI:0007(anti tag coimmunoprecipitation)
Q8NEB9	Q99570	PIK3C3	PIK3R4	psi-mi:MI:0007(anti tag coimmunoprecipitation)
Q8NEB9	Q99570	PIK3C3	PIK3R4	psi-mi:MI:0007(anti tag coimmunoprecipitation)
Q8NEB9	Q96F24	PIK3C3	NRBF2	psi-mi:MI:0006(anti bait coimmunoprecipitation)
Q8NEB9	Q96F24	PIK3C3	NRBF2	psi-mi:MI:0006(anti bait coimmunoprecipitation)
Q8NEB9	Q96F24	PIK3C3	NRBF2	psi-mi:MI:0006(anti bait coimmunoprecipitation)
Q8NEB9	Q96F24	PIK3C3	NRBF2	psi-mi:MI:0006(anti bait coimmunoprecipitation)
Q8NEB9	Q96F24	PIK3C3	NRBF2	psi-mi:MI:0007(anti tag coimmunoprecipitation)
Q8NEB9	Q96F24	PIK3C3	NRBF2	psi-mi:MI:0007(anti tag coimmunoprecipitation)
Q8NEB9	Q96F24	PIK3C3	NRBF2	psi-mi:MI:0007(anti tag coimmunoprecipitation)
Q8NEB9	Q14457	PIK3C3	BECN1	psi-mi:MI:0006(anti bait coimmunoprecipitation)
Q8NEB9	Q14457	PIK3C3	BECN1	psi-mi:MI:0006(anti bait coimmunoprecipitation)
Q8NEB9	Q14457	PIK3C3	BECN1	psi-mi:MI:0006(anti bait coimmunoprecipitation)
Q8NEB9	Q14457	PIK3C3	BECN1	psi-mi:MI:0006(anti bait coimmunoprecipitation)
Q8NEB9	Q14457	PIK3C3	BECN1	psi-mi:MI:0006(anti bait coimmunoprecipitation)
Q8NEB9	Q14457	PIK3C3	BECN1	psi-mi:MI:0006(anti bait coimmunoprecipitation)
Q8NEB9	Q14457	PIK3C3	BECN1	psi-mi:MI:0006(anti bait coimmunoprecipitation)
Q8NEB9	Q14457	PIK3C3	BECN1	psi-mi:MI:0006(anti bait coimmunoprecipitation)
Q8NEB9	Q14457	PIK3C3	BECN1	psi-mi:MI:0007(anti tag coimmunoprecipitation)
Q8NEB9	Q14457	PIK3C3	BECN1	psi-mi:MI:0007(anti tag coimmunoprecipitation)
Q8NEB9	Q14457	PIK3C3	BECN1	psi-mi:MI:0007(anti tag coimmunoprecipitation)
Q8NEB9	Q14457	PIK3C3	BECN1	psi-mi:MI:0007(anti tag coimmunoprecipitation)
Q8NEB9	Q14457	PIK3C3	BECN1	psi-mi:MI:0007(anti tag coimmunoprecipitation)
Q8NEB9	Q14457	PIK3C3	BECN1	psi-mi:MI:0007(anti tag coimmunoprecipitation)
Q8NEB9	Q14457	PIK3C3	BECN1	psi-mi:MI:0007(anti tag coimmunoprecipitation)
Q8NEB9	Q14457	PIK3C3	BECN1	psi-mi:MI:0007(anti tag coimmunoprecipitation)
Q8NEB9	Q9Y371	PIK3C3	SH3GLB1	psi-mi:MI:0006(anti bait coimmunoprecipitation)
Q8NEB9	Q9P2Y5	PIK3C3	UVRAG	psi-mi:MI:0006(anti bait coimmunoprecipitation)
Q8NEB9	Q9P2Y5	PIK3C3	UVRAG	psi-mi:MI:0006(anti bait coimmunoprecipitation)
Q8NEB9	Q9P2Y5	PIK3C3	UVRAG	psi-mi:MI:0006(anti bait coimmunoprecipitation)
Q8NEB9	Q9P2Y5	PIK3C3	UVRAG	psi-mi:MI:0006(anti bait coimmunoprecipitation)
Q8NEB9	Q9P2Y5	PIK3C3	UVRAG	psi-mi:MI:0006(anti bait coimmunoprecipitation)
Q8NEB9	Q9P2Y5	PIK3C3	UVRAG	psi-mi:MI:0006(anti bait coimmunoprecipitation)
Q8NEB9	Q9P2Y5	PIK3C3	UVRAG	psi-mi:MI:0007(anti tag coimmunoprecipitation)
Q8NEB9	Q9P2Y5	PIK3C3	UVRAG	psi-mi:MI:0007(anti tag coimmunoprecipitation)
Q8NEB9	Q9P2Y5	PIK3C3	UVRAG	psi-mi:MI:0007(anti tag coimmunoprecipitation)
Q8NEB9	Q9P2Y5	PIK3C3	UVRAG	psi-mi:MI:0007(anti tag coimmunoprecipitation)
Q8NEB9	Q9P2Y5	PIK3C3	UVRAG	psi-mi:MI:0007(anti tag coimmunoprecipitation)
Q8NEB9	Q9P2Y5	PIK3C3	UVRAG	psi-mi:MI:0007(anti tag coimmunoprecipitation)
Q8NEB9	Q14964	PIK3C3	RAB39A	psi-mi:MI:0007(anti tag coimmunoprecipitation)
Q8NEB9	Q14964	PIK3C3	RAB39A	psi-mi:MI:0007(anti tag coimmunoprecipitation)
P27986	P00533	PIK3R1	EGFR	psi-mi:MI:0019(coimmunoprecipitation)
Q99570	Q8NEB9	PIK3R4	PIK3C3	psi-mi:MI:0007(anti tag coimmunoprecipitation)
P17612	Q5S007	PRKACA	LRRK2	psi-mi:MI:0006(anti bait coimmunoprecipitation)
P17612	Q5S007	PRKACA	LRRK2	psi-mi:MI:0424(protein kinase assay)
P17612	Q5S007	PRKACA	LRRK2	psi-mi:MI:0424(protein kinase assay)
P17612	Q5S007	PRKACA	LRRK2	psi-mi:MI:0424(protein kinase assay)
P17612	Q5S007	PRKACA	LRRK2	psi-mi:MI:0424(protein kinase assay)
P17612	Q5S007	PRKACA	LRRK2	psi-mi:MI:0424(protein kinase assay)
O60260	Q5S007	PRKN	LRRK2	psi-mi:MI:0007(anti tag coimmunoprecipitation)
O60260	Q5S007	PRKN	LRRK2	psi-mi:MI:0007(anti tag coimmunoprecipitation)
P61026	Q5S007	RAB10	LRRK2	psi-mi:MI:0007(anti tag coimmunoprecipitation)
P61026	Q5S007	RAB10	LRRK2	psi-mi:MI:0007(anti tag coimmunoprecipitation)
P61026	Q5S007	RAB10	LRRK2	psi-mi:MI:0424(protein kinase assay)
P61026	Q5S007	RAB10	LRRK2	psi-mi:MI:0424(protein kinase assay)
P61026	Q5S007	RAB10	LRRK2	psi-mi:MI:0424(protein kinase assay)
P61026	Q5S007	RAB10	LRRK2	psi-mi:MI:0424(protein kinase assay)
P61026	Q5S007	RAB10	LRRK2	psi-mi:MI:0424(protein kinase assay)
P61026	Q5S007	RAB10	LRRK2	psi-mi:MI:0424(protein kinase assay)
P61026	Q15286	RAB10	RAB35	psi-mi:MI:0007(anti tag coimmunoprecipitation)
P61026	P61966	RAB10	AP1S1	psi-mi:MI:0006(anti bait coimmunoprecipitation)
P61026	P31150	RAB10	GDI1	psi-mi:MI:0007(anti tag coimmunoprecipitation)
P61026	P31150	RAB10	GDI1	psi-mi:MI:0007(anti tag coimmunoprecipitation)
P61026	P31150	RAB10	GDI1	psi-mi:MI:0007(anti tag coimmunoprecipitation)
P61026	O14965	RAB10	AURKA	psi-mi:MI:0006(anti bait coimmunoprecipitation)
P61026	P50395	RAB10	GDI2	psi-mi:MI:0007(anti tag coimmunoprecipitation)
P61026	P50395	RAB10	GDI2	psi-mi:MI:0007(anti tag coimmunoprecipitation)
P61026	P50395	RAB10	GDI2	psi-mi:MI:0007(anti tag coimmunoprecipitation)
P61026	Q9H0N0	RAB10	RAB6C	psi-mi:MI:0007(anti tag coimmunoprecipitation)
P61026	Q14964	RAB10	RAB39A	psi-mi:MI:0007(anti tag coimmunoprecipitation)
P61026	Q14964	RAB10	RAB39A	psi-mi:MI:0007(anti tag coimmunoprecipitation)
P61026	A4D1S5	RAB10	RAB19	psi-mi:MI:0007(anti tag coimmunoprecipitation)
P62491	P0DMV8	RAB11A	HSPA1A	psi-mi:MI:0096(pull down)
P62491	P0DMV8	RAB11A	HSPA1A	psi-mi:MI:0096(pull down)
P62491	P00533	RAB11A	EGFR	psi-mi:MI:0006(anti bait coimmunoprecipitation)
P62491	P00533	RAB11A	EGFR	psi-mi:MI:0006(anti bait coimmunoprecipitation)
P62491	O75154	RAB11A	RAB11FIP3	psi-mi:MI:0096(pull down)
P62491	O75154	RAB11A	RAB11FIP3	psi-mi:MI:0096(pull down)
P62491	Q86YS3	RAB11A	RAB11FIP4	psi-mi:MI:0096(pull down)
P62491	Q9UBF8	RAB11A	PI4KB	psi-mi:MI:0096(pull down)
P62491	Q9UBF8	RAB11A	PI4KB	psi-mi:MI:0107(surface plasmon resonance)
P62491	Q9UBF8	RAB11A	PI4KB	psi-mi:MI:0114(x-ray crystallography)
P62491	P84085	RAB11A	ARF5	psi-mi:MI:0096(pull down)
P62491	P84085	RAB11A	ARF5	psi-mi:MI:0096(pull down)
P62491	Q7L804	RAB11A	RAB11FIP2	psi-mi:MI:0007(anti tag coimmunoprecipitation)
P62491	Q7L804	RAB11A	RAB11FIP2	psi-mi:MI:0007(anti tag coimmunoprecipitation)
P62491	Q7L804	RAB11A	RAB11FIP2	psi-mi:MI:0007(anti tag coimmunoprecipitation)
P62491	Q7L804	RAB11A	RAB11FIP2	psi-mi:MI:0007(anti tag coimmunoprecipitation)
P62491	Q7L804	RAB11A	RAB11FIP2	psi-mi:MI:0114(x-ray crystallography)
P62491	Q7L804	RAB11A	RAB11FIP2	psi-mi:MI:0114(x-ray crystallography)
P62491	Q5JSH3	RAB11A	WDR44	psi-mi:MI:0007(anti tag coimmunoprecipitation)
P62491	Q5JSH3	RAB11A	WDR44	psi-mi:MI:0007(anti tag coimmunoprecipitation)
P62491	O60447	RAB11A	EVI5	psi-mi:MI:0006(anti bait coimmunoprecipitation)
P62491	O60447	RAB11A	EVI5	psi-mi:MI:0006(anti bait coimmunoprecipitation)
P62491	O60447	RAB11A	EVI5	psi-mi:MI:0007(anti tag coimmunoprecipitation)
P62491	O60447	RAB11A	EVI5	psi-mi:MI:0007(anti tag coimmunoprecipitation)
P62491	O60447	RAB11A	EVI5	psi-mi:MI:0096(pull down)
P62491	O60447	RAB11A	EVI5	psi-mi:MI:0096(pull down)
P62491	O60447	RAB11A	EVI5	psi-mi:MI:0096(pull down)
P62491	O60447	RAB11A	EVI5	psi-mi:MI:0096(pull down)
P62491	O60447	RAB11A	EVI5	psi-mi:MI:0107(surface plasmon resonance)
P62491	O60447	RAB11A	EVI5	psi-mi:MI:0107(surface plasmon resonance)
P62491	Q6WKZ4	RAB11A	RAB11FIP1	psi-mi:MI:0007(anti tag coimmunoprecipitation)
P62491	Q6WKZ4	RAB11A	RAB11FIP1	psi-mi:MI:0007(anti tag coimmunoprecipitation)
P62491	Q9BXF6	RAB11A	RAB11FIP5	psi-mi:MI:0007(anti tag coimmunoprecipitation)
P62491	Q9BXF6	RAB11A	RAB11FIP5	psi-mi:MI:0007(anti tag coimmunoprecipitation)
P62491	Q8NBJ4	RAB11A	GOLM1	psi-mi:MI:0007(anti tag coimmunoprecipitation)
P62491	Q8NBJ4	RAB11A	GOLM1	psi-mi:MI:0007(anti tag coimmunoprecipitation)
P62491	Q9BTV4	RAB11A	TMEM43	psi-mi:MI:0007(anti tag coimmunoprecipitation)
P62491	Q9BTV4	RAB11A	TMEM43	psi-mi:MI:0007(anti tag coimmunoprecipitation)
Q6WKZ4	P62491	RAB11FIP1	RAB11A	psi-mi:MI:0006(anti bait coimmunoprecipitation)
Q6WKZ4	P62491	RAB11FIP1	RAB11A	psi-mi:MI:0006(anti bait coimmunoprecipitation)
Q7L804	P62491	RAB11FIP2	RAB11A	psi-mi:MI:0096(pull down)
Q7L804	P62491	RAB11FIP2	RAB11A	psi-mi:MI:0096(pull down)
Q7L804	Q7L804	RAB11FIP2	RAB11FIP2	psi-mi:MI:0114(x-ray crystallography)
Q7L804	Q7L804	RAB11FIP2	RAB11FIP2	psi-mi:MI:0114(x-ray crystallography)
O75154	Q9H0H5	RAB11FIP3	RACGAP1	psi-mi:MI:0006(anti bait coimmunoprecipitation)
O75154	Q9H0H5	RAB11FIP3	RACGAP1	psi-mi:MI:0007(anti tag coimmunoprecipitation)
O75154	Q9H0H5	RAB11FIP3	RACGAP1	psi-mi:MI:0096(pull down)
O75154	Q9H0H5	RAB11FIP3	RACGAP1	psi-mi:MI:0096(pull down)
O75154	P62491	RAB11FIP3	RAB11A	psi-mi:MI:0096(pull down)
O75154	P62491	RAB11FIP3	RAB11A	psi-mi:MI:0096(pull down)
O75154	P62491	RAB11FIP3	RAB11A	psi-mi:MI:0096(pull down)
O75154	P62491	RAB11FIP3	RAB11A	psi-mi:MI:0096(pull down)
O75154	P62491	RAB11FIP3	RAB11A	psi-mi:MI:0096(pull down)
O75154	P62491	RAB11FIP3	RAB11A	psi-mi:MI:0096(pull down)
O75154	P62491	RAB11FIP3	RAB11A	psi-mi:MI:0096(pull down)
O75154	P62491	RAB11FIP3	RAB11A	psi-mi:MI:0114(x-ray crystallography)
O75154	P62491	RAB11FIP3	RAB11A	psi-mi:MI:0114(x-ray crystallography)
O75154	P62491	RAB11FIP3	RAB11A	psi-mi:MI:0114(x-ray crystallography)
O75154	P62491	RAB11FIP3	RAB11A	psi-mi:MI:0826(x ray scattering)
Q9BXF6	P62491	RAB11FIP5	RAB11A	psi-mi:MI:0096(pull down)
Q9BXF6	P62491	RAB11FIP5	RAB11A	psi-mi:MI:0096(pull down)
Q9BXF6	Q96RF0	RAB11FIP5	SNX18	psi-mi:MI:0096(pull down)
Q9BXF6	Q96RF0	RAB11FIP5	SNX18	psi-mi:MI:0096(pull down)
Q6IQ22	Q5S007	RAB12	LRRK2	psi-mi:MI:0007(anti tag coimmunoprecipitation)
Q6IQ22	Q5S007	RAB12	LRRK2	psi-mi:MI:0007(anti tag coimmunoprecipitation)
Q6IQ22	P31150	RAB12	GDI1	psi-mi:MI:0007(anti tag coimmunoprecipitation)
Q6IQ22	P31150	RAB12	GDI1	psi-mi:MI:0007(anti tag coimmunoprecipitation)
Q6IQ22	P31150	RAB12	GDI1	psi-mi:MI:0007(anti tag coimmunoprecipitation)
Q6IQ22	P50395	RAB12	GDI2	psi-mi:MI:0007(anti tag coimmunoprecipitation)
Q6IQ22	P50395	RAB12	GDI2	psi-mi:MI:0007(anti tag coimmunoprecipitation)
Q6IQ22	P50395	RAB12	GDI2	psi-mi:MI:0007(anti tag coimmunoprecipitation)
Q6IQ22	P61026	RAB12	RAB10	psi-mi:MI:0007(anti tag coimmunoprecipitation)
Q6IQ22	P61026	RAB12	RAB10	psi-mi:MI:0007(anti tag coimmunoprecipitation)
Q6IQ22	Q9H0N0	RAB12	RAB6C	psi-mi:MI:0007(anti tag coimmunoprecipitation)
Q6IQ22	Q14964	RAB12	RAB39A	psi-mi:MI:0007(anti tag coimmunoprecipitation)
Q6IQ22	Q14964	RAB12	RAB39A	psi-mi:MI:0007(anti tag coimmunoprecipitation)
P61106	P30480	RAB14	HLA-B	psi-mi:MI:0006(anti bait coimmunoprecipitation)
P61106	Q01968	RAB14	OCRL	psi-mi:MI:0096(pull down)
P62820	Q5S007	RAB1A	LRRK2	psi-mi:MI:0424(protein kinase assay)
P62820	Q01968	RAB1A	OCRL	psi-mi:MI:0096(pull down)
P62820	Q01968	RAB1A	OCRL	psi-mi:MI:0096(pull down)
P62820	Q01968	RAB1A	OCRL	psi-mi:MI:0096(pull down)
P62820	Q01968	RAB1A	OCRL	psi-mi:MI:0411(enzyme linked immunosorbent assay)
Q9H0U4	Q5S007	RAB1B	LRRK2	psi-mi:MI:0424(protein kinase assay)
Q9H0U4	Q5S007	RAB1B	LRRK2	psi-mi:MI:0424(protein kinase assay)
Q9H0U4	Q5S007	RAB1B	LRRK2	psi-mi:MI:0424(protein kinase assay)
Q9H0U4	P30480	RAB1B	HLA-B	psi-mi:MI:0006(anti bait coimmunoprecipitation)
Q9UL25	P30480	RAB21	HLA-B	psi-mi:MI:0006(anti bait coimmunoprecipitation)
O14966	Q5S007	RAB29	LRRK2	psi-mi:MI:0007(anti tag coimmunoprecipitation)
O14966	Q5S007	RAB29	LRRK2	psi-mi:MI:0007(anti tag coimmunoprecipitation)
O14966	Q5S007	RAB29	LRRK2	psi-mi:MI:0007(anti tag coimmunoprecipitation)
O14966	Q5S007	RAB29	LRRK2	psi-mi:MI:0007(anti tag coimmunoprecipitation)
O14966	P11142	RAB29	HSPA8	psi-mi:MI:0007(anti tag coimmunoprecipitation)
O14966	P11142	RAB29	HSPA8	psi-mi:MI:0007(anti tag coimmunoprecipitation)
O14966	O14976	RAB29	GAK	psi-mi:MI:0007(anti tag coimmunoprecipitation)
O14966	O14976	RAB29	GAK	psi-mi:MI:0007(anti tag coimmunoprecipitation)
P61019	P30480	RAB2A	HLA-B	psi-mi:MI:0006(anti bait coimmunoprecipitation)
Q13637	Q5S007	RAB32	LRRK2	psi-mi:MI:0007(anti tag coimmunoprecipitation)
Q14964	Q14457	RAB39A	BECN1	psi-mi:MI:0006(anti bait coimmunoprecipitation)
Q14964	Q14457	RAB39A	BECN1	psi-mi:MI:0006(anti bait coimmunoprecipitation)
P20339	Q01968	RAB5A	OCRL	psi-mi:MI:0096(pull down)
P20339	Q01968	RAB5A	OCRL	psi-mi:MI:0096(pull down)
P61020	Q5S007	RAB5B	LRRK2	psi-mi:MI:0424(protein kinase assay)
P61020	Q5S007	RAB5B	LRRK2	psi-mi:MI:0424(protein kinase assay)
P61020	Q5S007	RAB5B	LRRK2	psi-mi:MI:0424(protein kinase assay)
P61020	Q5S007	RAB5B	LRRK2	psi-mi:MI:0424(protein kinase assay)
P51148	P30480	RAB5C	HLA-B	psi-mi:MI:0006(anti bait coimmunoprecipitation)
P51148	Q8WVM8	RAB5C	SCFD1	psi-mi:MI:0007(anti tag coimmunoprecipitation)
P20340	P30480	RAB6A	HLA-B	psi-mi:MI:0006(anti bait coimmunoprecipitation)
P20340	P30480	RAB6A	HLA-B	psi-mi:MI:0006(anti bait coimmunoprecipitation)
P20340	Q01968	RAB6A	OCRL	psi-mi:MI:0096(pull down)
P20340	Q01968	RAB6A	OCRL	psi-mi:MI:0096(pull down)
P20340	Q01968	RAB6A	OCRL	psi-mi:MI:0096(pull down)
P20340	Q01968	RAB6A	OCRL	psi-mi:MI:0096(pull down)
P20340	Q01968	RAB6A	OCRL	psi-mi:MI:0411(enzyme linked immunosorbent assay)
P20340	Q01968	RAB6A	OCRL	psi-mi:MI:0411(enzyme linked immunosorbent assay)
P51149	P30480	RAB7A	HLA-B	psi-mi:MI:0006(anti bait coimmunoprecipitation)
P51149	Q9BTV4	RAB7A	TMEM43	psi-mi:MI:0007(anti tag coimmunoprecipitation)
P61006	O14641	RAB8A	DVL2	psi-mi:MI:0007(anti tag coimmunoprecipitation)
P61006	O14641	RAB8A	DVL2	psi-mi:MI:0007(anti tag coimmunoprecipitation)
P61006	Q5S007	RAB8A	LRRK2	psi-mi:MI:0007(anti tag coimmunoprecipitation)
P61006	Q5S007	RAB8A	LRRK2	psi-mi:MI:0007(anti tag coimmunoprecipitation)
P61006	Q5S007	RAB8A	LRRK2	psi-mi:MI:0007(anti tag coimmunoprecipitation)
P61006	Q5S007	RAB8A	LRRK2	psi-mi:MI:0007(anti tag coimmunoprecipitation)
P61006	Q5S007	RAB8A	LRRK2	psi-mi:MI:0424(protein kinase assay)
P61006	Q5S007	RAB8A	LRRK2	psi-mi:MI:0424(protein kinase assay)
P61006	Q5S007	RAB8A	LRRK2	psi-mi:MI:0424(protein kinase assay)
P61006	Q5S007	RAB8A	LRRK2	psi-mi:MI:0424(protein kinase assay)
P61006	Q5S007	RAB8A	LRRK2	psi-mi:MI:0424(protein kinase assay)
P61006	Q5S007	RAB8A	LRRK2	psi-mi:MI:0424(protein kinase assay)
P61006	Q5S007	RAB8A	LRRK2	psi-mi:MI:0424(protein kinase assay)
P61006	Q5S007	RAB8A	LRRK2	psi-mi:MI:0424(protein kinase assay)
P61006	P31150	RAB8A	GDI1	psi-mi:MI:0007(anti tag coimmunoprecipitation)
P61006	P31150	RAB8A	GDI1	psi-mi:MI:0007(anti tag coimmunoprecipitation)
P61006	P31150	RAB8A	GDI1	psi-mi:MI:0007(anti tag coimmunoprecipitation)
P61006	P31150	RAB8A	GDI1	psi-mi:MI:0007(anti tag coimmunoprecipitation)
P61006	P50395	RAB8A	GDI2	psi-mi:MI:0007(anti tag coimmunoprecipitation)
P61006	P50395	RAB8A	GDI2	psi-mi:MI:0007(anti tag coimmunoprecipitation)
P61006	P50395	RAB8A	GDI2	psi-mi:MI:0007(anti tag coimmunoprecipitation)
P61006	P50395	RAB8A	GDI2	psi-mi:MI:0007(anti tag coimmunoprecipitation)
P61006	Q9P0L0	RAB8A	VAPA	psi-mi:MI:0007(anti tag coimmunoprecipitation)
P61006	P27105	RAB8A	STOM	psi-mi:MI:0676(tandem affinity purification)
P61006	P27105	RAB8A	STOM	psi-mi:MI:0676(tandem affinity purification)
P61006	Q92538	RAB8A	GBF1	psi-mi:MI:0007(anti tag coimmunoprecipitation)
P61006	Q92538	RAB8A	GBF1	psi-mi:MI:0007(anti tag coimmunoprecipitation)
P61006	P84077	RAB8A	ARF1	psi-mi:MI:0007(anti tag coimmunoprecipitation)
P61006	P84077	RAB8A	ARF1	psi-mi:MI:0007(anti tag coimmunoprecipitation)
P61006	Q92930	RAB8A	RAB8B	psi-mi:MI:0007(anti tag coimmunoprecipitation)
P61006	Q92930	RAB8A	RAB8B	psi-mi:MI:0007(anti tag coimmunoprecipitation)
P61006	P61026	RAB8A	RAB10	psi-mi:MI:0006(anti bait coimmunoprecipitation)
P61006	P61026	RAB8A	RAB10	psi-mi:MI:0006(anti bait coimmunoprecipitation)
P61006	Q9H0N0	RAB8A	RAB6C	psi-mi:MI:0007(anti tag coimmunoprecipitation)
P61006	Q01968	RAB8A	OCRL	psi-mi:MI:0007(anti tag coimmunoprecipitation)
P61006	Q01968	RAB8A	OCRL	psi-mi:MI:0007(anti tag coimmunoprecipitation)
P61006	Q01968	RAB8A	OCRL	psi-mi:MI:0007(anti tag coimmunoprecipitation)
P61006	Q01968	RAB8A	OCRL	psi-mi:MI:0007(anti tag coimmunoprecipitation)
P61006	Q01968	RAB8A	OCRL	psi-mi:MI:0096(pull down)
P61006	Q01968	RAB8A	OCRL	psi-mi:MI:0096(pull down)
P61006	P18085	RAB8A	ARF4	psi-mi:MI:0007(anti tag coimmunoprecipitation)
P61006	P40616	RAB8A	ARL1	psi-mi:MI:0007(anti tag coimmunoprecipitation)
P61006	P84085	RAB8A	ARF5	psi-mi:MI:0007(anti tag coimmunoprecipitation)
P61006	P84085	RAB8A	ARF5	psi-mi:MI:0007(anti tag coimmunoprecipitation)
P61006	P84085	RAB8A	ARF5	psi-mi:MI:0007(anti tag coimmunoprecipitation)
P61006	P84085	RAB8A	ARF5	psi-mi:MI:0007(anti tag coimmunoprecipitation)
P61006	P20340	RAB8A	RAB6A	psi-mi:MI:0007(anti tag coimmunoprecipitation)
P61006	P20340	RAB8A	RAB6A	psi-mi:MI:0007(anti tag coimmunoprecipitation)
P61006	P62820	RAB8A	RAB1A	psi-mi:MI:0007(anti tag coimmunoprecipitation)
P61006	P32019	RAB8A	INPP5B	psi-mi:MI:0007(anti tag coimmunoprecipitation)
P61006	P32019	RAB8A	INPP5B	psi-mi:MI:0007(anti tag coimmunoprecipitation)
P61006	P32019	RAB8A	INPP5B	psi-mi:MI:0007(anti tag coimmunoprecipitation)
P61006	Q9NP72	RAB8A	RAB18	psi-mi:MI:0007(anti tag coimmunoprecipitation)
P61006	Q9NP72	RAB8A	RAB18	psi-mi:MI:0007(anti tag coimmunoprecipitation)
P61006	Q96C24	RAB8A	SYTL4	psi-mi:MI:0007(anti tag coimmunoprecipitation)
P61006	Q96C24	RAB8A	SYTL4	psi-mi:MI:0007(anti tag coimmunoprecipitation)
P61006	Q8IWV1	RAB8A	LAX1	psi-mi:MI:0006(anti bait coimmunoprecipitation)
P61006	Q14964	RAB8A	RAB39A	psi-mi:MI:0007(anti tag coimmunoprecipitation)
P61006	Q14964	RAB8A	RAB39A	psi-mi:MI:0007(anti tag coimmunoprecipitation)
P61006	Q14964	RAB8A	RAB39A	psi-mi:MI:0007(anti tag coimmunoprecipitation)
P61006	Q14964	RAB8A	RAB39A	psi-mi:MI:0007(anti tag coimmunoprecipitation)
P51151	P0DMV8	RAB9A	HSPA1A	psi-mi:MI:0096(pull down)
P63000	Q5S007	RAC1	LRRK2	psi-mi:MI:0006(anti bait coimmunoprecipitation)
P63000	Q5S007	RAC1	LRRK2	psi-mi:MI:0007(anti tag coimmunoprecipitation)
P63000	Q5S007	RAC1	LRRK2	psi-mi:MI:0007(anti tag coimmunoprecipitation)
P63000	Q5S007	RAC1	LRRK2	psi-mi:MI:0007(anti tag coimmunoprecipitation)
P63000	P27105	RAC1	STOM	psi-mi:MI:0676(tandem affinity purification)
P63000	Q01968	RAC1	OCRL	psi-mi:MI:0096(pull down)
Q9H0H5	Q86YS3	RACGAP1	RAB11FIP4	psi-mi:MI:0096(pull down)
Q9Y4G8	P42858	RAPGEF2	HTT	psi-mi:MI:0007(anti tag coimmunoprecipitation)
Q9H6L5	Q9H0R8	RETREG1	GABARAPL1	psi-mi:MI:0096(pull down)
P61586	P30480	RHOA	HLA-B	psi-mi:MI:0006(anti bait coimmunoprecipitation)
Q6NUQ1	O43264	RINT1	ZW10	psi-mi:MI:0006(anti bait coimmunoprecipitation)
Q6NUQ1	O43264	RINT1	ZW10	psi-mi:MI:0006(anti bait coimmunoprecipitation)
Q6NUQ1	O43264	RINT1	ZW10	psi-mi:MI:0006(anti bait coimmunoprecipitation)
Q6NUQ1	O43264	RINT1	ZW10	psi-mi:MI:0006(anti bait coimmunoprecipitation)
Q6NUQ1	O43264	RINT1	ZW10	psi-mi:MI:0006(anti bait coimmunoprecipitation)
Q6NUQ1	O43264	RINT1	ZW10	psi-mi:MI:0006(anti bait coimmunoprecipitation)
Q6NUQ1	O43264	RINT1	ZW10	psi-mi:MI:0006(anti bait coimmunoprecipitation)
Q6NUQ1	O43264	RINT1	ZW10	psi-mi:MI:0006(anti bait coimmunoprecipitation)
Q6NUQ1	O43264	RINT1	ZW10	psi-mi:MI:0006(anti bait coimmunoprecipitation)
Q6NUQ1	O43264	RINT1	ZW10	psi-mi:MI:0006(anti bait coimmunoprecipitation)
Q6NUQ1	O43264	RINT1	ZW10	psi-mi:MI:0006(anti bait coimmunoprecipitation)
Q6NUQ1	O43264	RINT1	ZW10	psi-mi:MI:0006(anti bait coimmunoprecipitation)
Q6NUQ1	O43264	RINT1	ZW10	psi-mi:MI:0007(anti tag coimmunoprecipitation)
Q6NUQ1	O43264	RINT1	ZW10	psi-mi:MI:0007(anti tag coimmunoprecipitation)
Q6FHT8	P30480	RNP24	HLA-B	psi-mi:MI:0006(anti bait coimmunoprecipitation)
Q5SQT9	P30480	SAR1A	HLA-B	psi-mi:MI:0006(anti bait coimmunoprecipitation)
Q8WVM8	Q96JB2	SCFD1	COG3	psi-mi:MI:0007(anti tag coimmunoprecipitation)
Q8WVM8	Q96JB2	SCFD1	COG3	psi-mi:MI:0007(anti tag coimmunoprecipitation)
Q8WVM8	P83436	SCFD1	COG7	psi-mi:MI:0007(anti tag coimmunoprecipitation)
Q8WVM8	P83436	SCFD1	COG7	psi-mi:MI:0007(anti tag coimmunoprecipitation)
Q8WVM8	Q9H9E3	SCFD1	COG4	psi-mi:MI:0007(anti tag coimmunoprecipitation)
Q8WVM8	Q9H9E3	SCFD1	COG4	psi-mi:MI:0007(anti tag coimmunoprecipitation)
Q8WVM8	Q9H9E3	SCFD1	COG4	psi-mi:MI:0007(anti tag coimmunoprecipitation)
Q8WVM8	Q9H9E3	SCFD1	COG4	psi-mi:MI:0007(anti tag coimmunoprecipitation)
Q8WVM8	Q9H9E3	SCFD1	COG4	psi-mi:MI:0096(pull down)
Q8WVM8	Q9H9E3	SCFD1	COG4	psi-mi:MI:0096(pull down)
Q8WVM8	Q9H9E3	SCFD1	COG4	psi-mi:MI:0096(pull down)
Q8WVM8	Q9H9E3	SCFD1	COG4	psi-mi:MI:0096(pull down)
P55735	P30480	SEC13	HLA-B	psi-mi:MI:0006(anti bait coimmunoprecipitation)
O15027	Q5S007	SEC16A	LRRK2	psi-mi:MI:0007(anti tag coimmunoprecipitation)
O15027	Q5S007	SEC16A	LRRK2	psi-mi:MI:0007(anti tag coimmunoprecipitation)
O15027	Q5S007	SEC16A	LRRK2	psi-mi:MI:0007(anti tag coimmunoprecipitation)
O15027	O14976	SEC16A	GAK	psi-mi:MI:0007(anti tag coimmunoprecipitation)
O75396	Q9P2W9	SEC22B	STX18	psi-mi:MI:0096(pull down)
Q15436	P30480	SEC23A	HLA-B	psi-mi:MI:0006(anti bait coimmunoprecipitation)
O43765	P30480	SGTA	HLA-B	psi-mi:MI:0006(anti bait coimmunoprecipitation)
Q99962	Q5S007	SH3GL2	LRRK2	psi-mi:MI:0424(protein kinase assay)
Q99962	Q5S007	SH3GL2	LRRK2	psi-mi:MI:0424(protein kinase assay)
Q99962	Q5S007	SH3GL2	LRRK2	psi-mi:MI:0424(protein kinase assay)
Q99962	P00533	SH3GL2	EGFR	psi-mi:MI:0006(anti bait coimmunoprecipitation)
Q99963	P42858	SH3GL3	HTT	psi-mi:MI:0077(nuclear magnetic resonance)
Q99963	P42858	SH3GL3	HTT	psi-mi:MI:0077(nuclear magnetic resonance)
Q99963	P42858	SH3GL3	HTT	psi-mi:MI:0077(nuclear magnetic resonance)
Q96B97	P00533	SH3KBP1	EGFR	psi-mi:MI:0006(anti bait coimmunoprecipitation)
Q96B97	P00533	SH3KBP1	EGFR	psi-mi:MI:0006(anti bait coimmunoprecipitation)
Q96B97	P00533	SH3KBP1	EGFR	psi-mi:MI:0006(anti bait coimmunoprecipitation)
O00400	Q5VYK3	SLC33A1	ECPAS	psi-mi:MI:0007(anti tag coimmunoprecipitation)
O00400	O43264	SLC33A1	ZW10	psi-mi:MI:0007(anti tag coimmunoprecipitation)
O00400	O43264	SLC33A1	ZW10	psi-mi:MI:0007(anti tag coimmunoprecipitation)
O00400	P61106	SLC33A1	RAB14	psi-mi:MI:0007(anti tag coimmunoprecipitation)
O00400	Q03518	SLC33A1	TAP1	psi-mi:MI:0007(anti tag coimmunoprecipitation)
O00400	Q9Y6K0	SLC33A1	CEPT1	psi-mi:MI:0007(anti tag coimmunoprecipitation)
Q9GZT3	P30480	SLIRP	HLA-B	psi-mi:MI:0006(anti bait coimmunoprecipitation)
Q5SQN1	Q13190	SNAP47	STX5	psi-mi:MI:0007(anti tag coimmunoprecipitation)
O95295	Q5S007	SNAPIN	LRRK2	psi-mi:MI:0006(anti bait coimmunoprecipitation)
O95295	Q5S007	SNAPIN	LRRK2	psi-mi:MI:0007(anti tag coimmunoprecipitation)
O95295	Q5S007	SNAPIN	LRRK2	psi-mi:MI:0424(protein kinase assay)
P37840	Q5S007	SNCA	LRRK2	psi-mi:MI:0006(anti bait coimmunoprecipitation)
P37840	Q5S007	SNCA	LRRK2	psi-mi:MI:0007(anti tag coimmunoprecipitation)
Q96RF0	Q9BXF6	SNX18	RAB11FIP5	psi-mi:MI:0096(pull down)
O60493	P30480	SNX3	HLA-B	psi-mi:MI:0006(anti bait coimmunoprecipitation)
Q9Y5X1	Q01968	SNX9	OCRL	psi-mi:MI:0007(anti tag coimmunoprecipitation)
Q99523	Q9BXF6	SORT1	RAB11FIP5	psi-mi:MI:0007(anti tag coimmunoprecipitation)
Q8NBT2	O95229	SPC24	ZWINT	psi-mi:MI:0007(anti tag coimmunoprecipitation)
P27105	O15260	STOM	SURF4	psi-mi:MI:0676(tandem affinity purification)
P27105	Q99720	STOM	SIGMAR1	psi-mi:MI:0676(tandem affinity purification)
P27105	O43264	STOM	ZW10	psi-mi:MI:0676(tandem affinity purification)
P27105	O43264	STOM	ZW10	psi-mi:MI:0676(tandem affinity purification)
P27105	Q15125	STOM	EBP	psi-mi:MI:0676(tandem affinity purification)
P27105	Q969N2	STOM	PIGT	psi-mi:MI:0676(tandem affinity purification)
Q9P2W9	Q8WVM8	STX18	SCFD1	psi-mi:MI:0006(anti bait coimmunoprecipitation)
Q9P2W9	Q8WVM8	STX18	SCFD1	psi-mi:MI:0006(anti bait coimmunoprecipitation)
Q9P2W9	O43264	STX18	ZW10	psi-mi:MI:0006(anti bait coimmunoprecipitation)
Q9P2W9	O43264	STX18	ZW10	psi-mi:MI:0006(anti bait coimmunoprecipitation)
Q9P2W9	O43264	STX18	ZW10	psi-mi:MI:0006(anti bait coimmunoprecipitation)
Q9P2W9	O43264	STX18	ZW10	psi-mi:MI:0006(anti bait coimmunoprecipitation)
Q9P2W9	O75396	STX18	SEC22B	psi-mi:MI:0006(anti bait coimmunoprecipitation)
Q13190	O75396	STX5	SEC22B	psi-mi:MI:0006(anti bait coimmunoprecipitation)
Q13190	Q9H9E3	STX5	COG4	psi-mi:MI:0096(pull down)
Q13190	Q9H9E3	STX5	COG4	psi-mi:MI:0096(pull down)
P61764	P11142	STXBP1	HSPA8	psi-mi:MI:0007(anti tag coimmunoprecipitation)
P61764	P11142	STXBP1	HSPA8	psi-mi:MI:0007(anti tag coimmunoprecipitation)
P37802	P30480	TAGLN2	HLA-B	psi-mi:MI:0006(anti bait coimmunoprecipitation)
P02786	P30480	TFRC	HLA-B	psi-mi:MI:0006(anti bait coimmunoprecipitation)
P02786	P61006	TFRC	RAB8A	psi-mi:MI:0096(pull down)
O43493	P0DMV8	TGOLN2	HSPA1A	psi-mi:MI:0096(pull down)
O43493	P35606	TGOLN2	COPB2	psi-mi:MI:0096(pull down)
P29401	P30480	TKT	HLA-B	psi-mi:MI:0006(anti bait coimmunoprecipitation)
O60603	P00533	TLR2	EGFR	psi-mi:MI:0006(anti bait coimmunoprecipitation)
P49755	P35606	TMED10	COPB2	psi-mi:MI:0004(affinity chromatography technology)
Q9BVK6	P35606	TMED9	COPB2	psi-mi:MI:0004(affinity chromatography technology)
O75674	P00533	TOM1L1	EGFR	psi-mi:MI:0007(anti tag coimmunoprecipitation)
O75674	P00533	TOM1L1	EGFR	psi-mi:MI:0007(anti tag coimmunoprecipitation)
Q12933	P00533	TRAF2	EGFR	psi-mi:MI:0007(anti tag coimmunoprecipitation)
Q15643	P30480	TRIP11	HLA-B	psi-mi:MI:0006(anti bait coimmunoprecipitation)
Q9GZZ9	Q9H0R8	UBA5	GABARAPL1	psi-mi:MI:0096(pull down)
Q9GZZ9	P35606	UBA5	COPB2	psi-mi:MI:0007(anti tag coimmunoprecipitation)
Q8IYT8	Q9H0R8	ULK2	GABARAPL1	psi-mi:MI:0096(pull down)
Q9NZ43	O43264	USE1	ZW10	psi-mi:MI:0006(anti bait coimmunoprecipitation)
Q9NZ43	O43264	USE1	ZW10	psi-mi:MI:0006(anti bait coimmunoprecipitation)
Q9NZ43	O43264	USE1	ZW10	psi-mi:MI:0006(anti bait coimmunoprecipitation)
Q9NZ43	O43264	USE1	ZW10	psi-mi:MI:0006(anti bait coimmunoprecipitation)
Q9NZ43	O43264	USE1	ZW10	psi-mi:MI:0006(anti bait coimmunoprecipitation)
Q9NZ43	O43264	USE1	ZW10	psi-mi:MI:0006(anti bait coimmunoprecipitation)
Q9NZ43	O43264	USE1	ZW10	psi-mi:MI:0007(anti tag coimmunoprecipitation)
Q9NZ43	O43264	USE1	ZW10	psi-mi:MI:0007(anti tag coimmunoprecipitation)
Q9NZ43	O43264	USE1	ZW10	psi-mi:MI:0096(pull down)
Q9NZ43	O43264	USE1	ZW10	psi-mi:MI:0096(pull down)
Q9P2Y5	Q9P253	UVRAG	VPS18	psi-mi:MI:0007(anti tag coimmunoprecipitation)
Q9P2Y5	Q9P253	UVRAG	VPS18	psi-mi:MI:0007(anti tag coimmunoprecipitation)
Q9P2Y5	Q9P253	UVRAG	VPS18	psi-mi:MI:0007(anti tag coimmunoprecipitation)
Q9P2Y5	Q8NEB9	UVRAG	PIK3C3	psi-mi:MI:0006(anti bait coimmunoprecipitation)
Q9P2Y5	Q8NEB9	UVRAG	PIK3C3	psi-mi:MI:0006(anti bait coimmunoprecipitation)
Q9P2Y5	Q8NEB9	UVRAG	PIK3C3	psi-mi:MI:0006(anti bait coimmunoprecipitation)
Q9P2Y5	Q8NEB9	UVRAG	PIK3C3	psi-mi:MI:0006(anti bait coimmunoprecipitation)
Q9P2Y5	Q8NEB9	UVRAG	PIK3C3	psi-mi:MI:0006(anti bait coimmunoprecipitation)
Q9P2Y5	Q8NEB9	UVRAG	PIK3C3	psi-mi:MI:0006(anti bait coimmunoprecipitation)
Q9P2Y5	Q8NEB9	UVRAG	PIK3C3	psi-mi:MI:0006(anti bait coimmunoprecipitation)
Q9P2Y5	Q8NEB9	UVRAG	PIK3C3	psi-mi:MI:0006(anti bait coimmunoprecipitation)
Q9P2Y5	Q8NEB9	UVRAG	PIK3C3	psi-mi:MI:0006(anti bait coimmunoprecipitation)
Q9P2Y5	Q8NEB9	UVRAG	PIK3C3	psi-mi:MI:0006(anti bait coimmunoprecipitation)
Q9P2Y5	Q8NEB9	UVRAG	PIK3C3	psi-mi:MI:0007(anti tag coimmunoprecipitation)
Q9P2Y5	Q8NEB9	UVRAG	PIK3C3	psi-mi:MI:0007(anti tag coimmunoprecipitation)
Q9P2Y5	Q8NEB9	UVRAG	PIK3C3	psi-mi:MI:0007(anti tag coimmunoprecipitation)
Q9P2Y5	Q8NEB9	UVRAG	PIK3C3	psi-mi:MI:0007(anti tag coimmunoprecipitation)
Q9P2Y5	Q8NEB9	UVRAG	PIK3C3	psi-mi:MI:0007(anti tag coimmunoprecipitation)
Q9P2Y5	Q8NEB9	UVRAG	PIK3C3	psi-mi:MI:0007(anti tag coimmunoprecipitation)
Q9P2Y5	Q8NEB9	UVRAG	PIK3C3	psi-mi:MI:0007(anti tag coimmunoprecipitation)
Q9P2Y5	Q8NEB9	UVRAG	PIK3C3	psi-mi:MI:0007(anti tag coimmunoprecipitation)
Q9P2Y5	Q8NEB9	UVRAG	PIK3C3	psi-mi:MI:0007(anti tag coimmunoprecipitation)
Q9P2Y5	Q8NEB9	UVRAG	PIK3C3	psi-mi:MI:0007(anti tag coimmunoprecipitation)
Q9P2Y5	Q8NEB9	UVRAG	PIK3C3	psi-mi:MI:0007(anti tag coimmunoprecipitation)
Q9P2Y5	Q8NEB9	UVRAG	PIK3C3	psi-mi:MI:0007(anti tag coimmunoprecipitation)
Q9P2Y5	Q8NEB9	UVRAG	PIK3C3	psi-mi:MI:0007(anti tag coimmunoprecipitation)
Q9P2Y5	Q8NEB9	UVRAG	PIK3C3	psi-mi:MI:0007(anti tag coimmunoprecipitation)
Q9P2Y5	Q8NEB9	UVRAG	PIK3C3	psi-mi:MI:0007(anti tag coimmunoprecipitation)
Q9P2Y5	Q8NEB9	UVRAG	PIK3C3	psi-mi:MI:0007(anti tag coimmunoprecipitation)
Q9P2Y5	Q8NEB9	UVRAG	PIK3C3	psi-mi:MI:0007(anti tag coimmunoprecipitation)
Q9P2Y5	Q8NEB9	UVRAG	PIK3C3	psi-mi:MI:0007(anti tag coimmunoprecipitation)
Q9P2Y5	Q8NEB9	UVRAG	PIK3C3	psi-mi:MI:0096(pull down)
Q9P2Y5	Q8NEB9	UVRAG	PIK3C3	psi-mi:MI:0096(pull down)
Q9P2Y5	Q99570	UVRAG	PIK3R4	psi-mi:MI:0007(anti tag coimmunoprecipitation)
Q9P2Y5	Q99570	UVRAG	PIK3R4	psi-mi:MI:0007(anti tag coimmunoprecipitation)
Q9P2Y5	Q99570	UVRAG	PIK3R4	psi-mi:MI:0007(anti tag coimmunoprecipitation)
Q9P2Y5	Q99570	UVRAG	PIK3R4	psi-mi:MI:0007(anti tag coimmunoprecipitation)
Q9P2Y5	Q99570	UVRAG	PIK3R4	psi-mi:MI:0096(pull down)
Q9P2Y5	Q96AX1	UVRAG	VPS33A	psi-mi:MI:0007(anti tag coimmunoprecipitation)
Q9P2Y5	Q96AX1	UVRAG	VPS33A	psi-mi:MI:0007(anti tag coimmunoprecipitation)
Q9P2Y5	Q96AX1	UVRAG	VPS33A	psi-mi:MI:0007(anti tag coimmunoprecipitation)
Q9P2Y5	Q96AX1	UVRAG	VPS33A	psi-mi:MI:0007(anti tag coimmunoprecipitation)
Q9P2Y5	Q14457	UVRAG	BECN1	psi-mi:MI:0006(anti bait coimmunoprecipitation)
Q9P2Y5	Q14457	UVRAG	BECN1	psi-mi:MI:0006(anti bait coimmunoprecipitation)
Q9P2Y5	Q14457	UVRAG	BECN1	psi-mi:MI:0006(anti bait coimmunoprecipitation)
Q9P2Y5	Q14457	UVRAG	BECN1	psi-mi:MI:0006(anti bait coimmunoprecipitation)
Q9P2Y5	Q14457	UVRAG	BECN1	psi-mi:MI:0006(anti bait coimmunoprecipitation)
Q9P2Y5	Q14457	UVRAG	BECN1	psi-mi:MI:0006(anti bait coimmunoprecipitation)
Q9P2Y5	Q14457	UVRAG	BECN1	psi-mi:MI:0006(anti bait coimmunoprecipitation)
Q9P2Y5	Q14457	UVRAG	BECN1	psi-mi:MI:0006(anti bait coimmunoprecipitation)
Q9P2Y5	Q14457	UVRAG	BECN1	psi-mi:MI:0006(anti bait coimmunoprecipitation)
Q9P2Y5	Q14457	UVRAG	BECN1	psi-mi:MI:0006(anti bait coimmunoprecipitation)
Q9P2Y5	Q14457	UVRAG	BECN1	psi-mi:MI:0006(anti bait coimmunoprecipitation)
Q9P2Y5	Q14457	UVRAG	BECN1	psi-mi:MI:0006(anti bait coimmunoprecipitation)
Q9P2Y5	Q14457	UVRAG	BECN1	psi-mi:MI:0006(anti bait coimmunoprecipitation)
Q9P2Y5	Q14457	UVRAG	BECN1	psi-mi:MI:0006(anti bait coimmunoprecipitation)
Q9P2Y5	Q14457	UVRAG	BECN1	psi-mi:MI:0006(anti bait coimmunoprecipitation)
Q9P2Y5	Q14457	UVRAG	BECN1	psi-mi:MI:0006(anti bait coimmunoprecipitation)
Q9P2Y5	Q14457	UVRAG	BECN1	psi-mi:MI:0007(anti tag coimmunoprecipitation)
Q9P2Y5	Q14457	UVRAG	BECN1	psi-mi:MI:0007(anti tag coimmunoprecipitation)
Q9P2Y5	Q14457	UVRAG	BECN1	psi-mi:MI:0007(anti tag coimmunoprecipitation)
Q9P2Y5	Q14457	UVRAG	BECN1	psi-mi:MI:0007(anti tag coimmunoprecipitation)
Q9P2Y5	Q14457	UVRAG	BECN1	psi-mi:MI:0007(anti tag coimmunoprecipitation)
Q9P2Y5	Q14457	UVRAG	BECN1	psi-mi:MI:0007(anti tag coimmunoprecipitation)
Q9P2Y5	Q14457	UVRAG	BECN1	psi-mi:MI:0007(anti tag coimmunoprecipitation)
Q9P2Y5	Q14457	UVRAG	BECN1	psi-mi:MI:0007(anti tag coimmunoprecipitation)
Q9P2Y5	Q14457	UVRAG	BECN1	psi-mi:MI:0007(anti tag coimmunoprecipitation)
Q9P2Y5	Q14457	UVRAG	BECN1	psi-mi:MI:0007(anti tag coimmunoprecipitation)
Q9P2Y5	Q14457	UVRAG	BECN1	psi-mi:MI:0007(anti tag coimmunoprecipitation)
Q9P2Y5	Q14457	UVRAG	BECN1	psi-mi:MI:0007(anti tag coimmunoprecipitation)
Q9P2Y5	Q14457	UVRAG	BECN1	psi-mi:MI:0007(anti tag coimmunoprecipitation)
Q9P2Y5	Q14457	UVRAG	BECN1	psi-mi:MI:0007(anti tag coimmunoprecipitation)
Q9P2Y5	Q14457	UVRAG	BECN1	psi-mi:MI:0007(anti tag coimmunoprecipitation)
Q9P2Y5	Q14457	UVRAG	BECN1	psi-mi:MI:0007(anti tag coimmunoprecipitation)
Q9P2Y5	Q14457	UVRAG	BECN1	psi-mi:MI:0007(anti tag coimmunoprecipitation)
Q9P2Y5	Q14457	UVRAG	BECN1	psi-mi:MI:0007(anti tag coimmunoprecipitation)
Q9P2Y5	Q14457	UVRAG	BECN1	psi-mi:MI:0007(anti tag coimmunoprecipitation)
Q9P2Y5	Q14457	UVRAG	BECN1	psi-mi:MI:0007(anti tag coimmunoprecipitation)
Q9P2Y5	Q14457	UVRAG	BECN1	psi-mi:MI:0007(anti tag coimmunoprecipitation)
Q9P2Y5	Q14457	UVRAG	BECN1	psi-mi:MI:0007(anti tag coimmunoprecipitation)
Q9P2Y5	Q14457	UVRAG	BECN1	psi-mi:MI:0007(anti tag coimmunoprecipitation)
Q9P2Y5	Q14457	UVRAG	BECN1	psi-mi:MI:0007(anti tag coimmunoprecipitation)
Q9P2Y5	Q14457	UVRAG	BECN1	psi-mi:MI:0096(pull down)
Q9P2Y5	Q14457	UVRAG	BECN1	psi-mi:MI:0096(pull down)
Q9P2Y5	Q14457	UVRAG	BECN1	psi-mi:MI:0096(pull down)
Q9P2Y5	Q14457	UVRAG	BECN1	psi-mi:MI:0096(pull down)
Q9P2Y5	Q14457	UVRAG	BECN1	psi-mi:MI:0096(pull down)
Q9P2Y5	Q14457	UVRAG	BECN1	psi-mi:MI:0096(pull down)
Q9P2Y5	Q14457	UVRAG	BECN1	psi-mi:MI:0096(pull down)
Q9P2Y5	Q14457	UVRAG	BECN1	psi-mi:MI:0096(pull down)
Q9P2Y5	Q9Y371	UVRAG	SH3GLB1	psi-mi:MI:0006(anti bait coimmunoprecipitation)
Q9P2Y5	Q9Y371	UVRAG	SH3GLB1	psi-mi:MI:0006(anti bait coimmunoprecipitation)
Q9P2Y5	Q9Y371	UVRAG	SH3GLB1	psi-mi:MI:0006(anti bait coimmunoprecipitation)
Q9P2Y5	Q9Y371	UVRAG	SH3GLB1	psi-mi:MI:0006(anti bait coimmunoprecipitation)
Q9P2Y5	Q9Y371	UVRAG	SH3GLB1	psi-mi:MI:0006(anti bait coimmunoprecipitation)
Q9P2Y5	Q9Y371	UVRAG	SH3GLB1	psi-mi:MI:0007(anti tag coimmunoprecipitation)
Q9P2Y5	Q9Y371	UVRAG	SH3GLB1	psi-mi:MI:0007(anti tag coimmunoprecipitation)
Q9P2Y5	Q9Y371	UVRAG	SH3GLB1	psi-mi:MI:0007(anti tag coimmunoprecipitation)
Q9P2Y5	Q9Y371	UVRAG	SH3GLB1	psi-mi:MI:0007(anti tag coimmunoprecipitation)
Q9P2Y5	Q9Y371	UVRAG	SH3GLB1	psi-mi:MI:0007(anti tag coimmunoprecipitation)
Q9P2Y5	Q9Y371	UVRAG	SH3GLB1	psi-mi:MI:0007(anti tag coimmunoprecipitation)
Q9P2Y5	P33176	UVRAG	KIF5B	psi-mi:MI:0007(anti tag coimmunoprecipitation)
Q9P2Y5	P0DP25	UVRAG	CALM3	psi-mi:MI:0007(anti tag coimmunoprecipitation)
Q9P2Y5	Q9P2Y5	UVRAG	UVRAG	psi-mi:MI:0007(anti tag coimmunoprecipitation)
Q9P2Y5	Q9P2Y5	UVRAG	UVRAG	psi-mi:MI:0007(anti tag coimmunoprecipitation)
Q9P2Y5	Q9P2Y5	UVRAG	UVRAG	psi-mi:MI:0007(anti tag coimmunoprecipitation)
Q9P2Y5	Q9P2Y5	UVRAG	UVRAG	psi-mi:MI:0007(anti tag coimmunoprecipitation)
Q9P2Y5	Q9P2Y5	UVRAG	UVRAG	psi-mi:MI:0007(anti tag coimmunoprecipitation)
Q9P2Y5	Q9P2Y5	UVRAG	UVRAG	psi-mi:MI:0007(anti tag coimmunoprecipitation)
Q9P2Y5	O43264	UVRAG	ZW10	psi-mi:MI:0006(anti bait coimmunoprecipitation)
Q9P2Y5	O43264	UVRAG	ZW10	psi-mi:MI:0006(anti bait coimmunoprecipitation)
Q9P2Y5	O43264	UVRAG	ZW10	psi-mi:MI:0006(anti bait coimmunoprecipitation)
Q9P2Y5	O43264	UVRAG	ZW10	psi-mi:MI:0006(anti bait coimmunoprecipitation)
Q9P2Y5	O43264	UVRAG	ZW10	psi-mi:MI:0006(anti bait coimmunoprecipitation)
Q9P2Y5	O43264	UVRAG	ZW10	psi-mi:MI:0006(anti bait coimmunoprecipitation)
Q9P2Y5	O43264	UVRAG	ZW10	psi-mi:MI:0006(anti bait coimmunoprecipitation)
Q9P2Y5	O43264	UVRAG	ZW10	psi-mi:MI:0006(anti bait coimmunoprecipitation)
Q9P2Y5	O43264	UVRAG	ZW10	psi-mi:MI:0006(anti bait coimmunoprecipitation)
Q9P2Y5	O43264	UVRAG	ZW10	psi-mi:MI:0006(anti bait coimmunoprecipitation)
Q9P2Y5	O43264	UVRAG	ZW10	psi-mi:MI:0006(anti bait coimmunoprecipitation)
Q9P2Y5	O43264	UVRAG	ZW10	psi-mi:MI:0006(anti bait coimmunoprecipitation)
Q9P2Y5	O43264	UVRAG	ZW10	psi-mi:MI:0007(anti tag coimmunoprecipitation)
Q9P2Y5	O43264	UVRAG	ZW10	psi-mi:MI:0007(anti tag coimmunoprecipitation)
Q9P2Y5	O43264	UVRAG	ZW10	psi-mi:MI:0007(anti tag coimmunoprecipitation)
Q9P2Y5	O43264	UVRAG	ZW10	psi-mi:MI:0007(anti tag coimmunoprecipitation)
Q9P2Y5	O43264	UVRAG	ZW10	psi-mi:MI:0007(anti tag coimmunoprecipitation)
Q9P2Y5	O43264	UVRAG	ZW10	psi-mi:MI:0007(anti tag coimmunoprecipitation)
Q9P2Y5	P35606	UVRAG	COPB2	psi-mi:MI:0006(anti bait coimmunoprecipitation)
Q9P2Y5	P35606	UVRAG	COPB2	psi-mi:MI:0006(anti bait coimmunoprecipitation)
Q9P2Y5	P35606	UVRAG	COPB2	psi-mi:MI:0006(anti bait coimmunoprecipitation)
Q9P2Y5	P35606	UVRAG	COPB2	psi-mi:MI:0006(anti bait coimmunoprecipitation)
Q9P2Y5	P35606	UVRAG	COPB2	psi-mi:MI:0006(anti bait coimmunoprecipitation)
Q9P2Y5	P35606	UVRAG	COPB2	psi-mi:MI:0006(anti bait coimmunoprecipitation)
Q9P2Y5	P35606	UVRAG	COPB2	psi-mi:MI:0007(anti tag coimmunoprecipitation)
Q9P2Y5	P35606	UVRAG	COPB2	psi-mi:MI:0007(anti tag coimmunoprecipitation)
Q9P2Y5	P35606	UVRAG	COPB2	psi-mi:MI:0007(anti tag coimmunoprecipitation)
Q9P2Y5	P35606	UVRAG	COPB2	psi-mi:MI:0007(anti tag coimmunoprecipitation)
Q9P2Y5	P35606	UVRAG	COPB2	psi-mi:MI:0007(anti tag coimmunoprecipitation)
Q9P2Y5	P35606	UVRAG	COPB2	psi-mi:MI:0007(anti tag coimmunoprecipitation)
Q9P2Y5	Q14964	UVRAG	RAB39A	psi-mi:MI:0007(anti tag coimmunoprecipitation)
Q9P2Y5	Q14964	UVRAG	RAB39A	psi-mi:MI:0007(anti tag coimmunoprecipitation)
Q9P0L0	P30480	VAPA	HLA-B	psi-mi:MI:0006(anti bait coimmunoprecipitation)
Q9P0L0	Q9BTV4	VAPA	TMEM43	psi-mi:MI:0007(anti tag coimmunoprecipitation)
P08670	Q14457	VIM	BECN1	psi-mi:MI:0007(anti tag coimmunoprecipitation)
P08670	Q14457	VIM	BECN1	psi-mi:MI:0007(anti tag coimmunoprecipitation)
Q3ZAQ7	P30480	VMA21	HLA-B	psi-mi:MI:0006(anti bait coimmunoprecipitation)
Q96GC9	Q14457	VMP1	BECN1	psi-mi:MI:0006(anti bait coimmunoprecipitation)
Q96QK1	P30480	VPS35	HLA-B	psi-mi:MI:0006(anti bait coimmunoprecipitation)
O43542	O43264	XRCC3	ZW10	psi-mi:MI:0007(anti tag coimmunoprecipitation)
O43542	O43264	XRCC3	ZW10	psi-mi:MI:0007(anti tag coimmunoprecipitation)
P63104	Q5S007	YWHAZ	LRRK2	psi-mi:MI:0096(pull down)
P63104	Q7L804	YWHAZ	RAB11FIP2	psi-mi:MI:0007(anti tag coimmunoprecipitation)
O43264	P50748	ZW10	KNTC1	psi-mi:MI:0006(anti bait coimmunoprecipitation)
O43264	P50748	ZW10	KNTC1	psi-mi:MI:0006(anti bait coimmunoprecipitation)
O43264	P50748	ZW10	KNTC1	psi-mi:MI:0007(anti tag coimmunoprecipitation)
O43264	P50748	ZW10	KNTC1	psi-mi:MI:0007(anti tag coimmunoprecipitation)
O43264	P50748	ZW10	KNTC1	psi-mi:MI:0676(tandem affinity purification)
O43264	P50748	ZW10	KNTC1	psi-mi:MI:0676(tandem affinity purification)
O43264	O14777	ZW10	NDC80	psi-mi:MI:0096(pull down)
O43264	O14777	ZW10	NDC80	psi-mi:MI:0096(pull down)
O43264	Q9P2Y5	ZW10	UVRAG	psi-mi:MI:0006(anti bait coimmunoprecipitation)
O43264	Q9P2Y5	ZW10	UVRAG	psi-mi:MI:0006(anti bait coimmunoprecipitation)
O43264	Q9P2Y5	ZW10	UVRAG	psi-mi:MI:0006(anti bait coimmunoprecipitation)
O43264	Q9P2Y5	ZW10	UVRAG	psi-mi:MI:0006(anti bait coimmunoprecipitation)
O43264	Q9P2Y5	ZW10	UVRAG	psi-mi:MI:0006(anti bait coimmunoprecipitation)
O43264	Q9P2Y5	ZW10	UVRAG	psi-mi:MI:0006(anti bait coimmunoprecipitation)
O43264	O95229	ZW10	ZWINT	psi-mi:MI:0007(anti tag coimmunoprecipitation)
O43264	O95229	ZW10	ZWINT	psi-mi:MI:0007(anti tag coimmunoprecipitation)
O43264	O95229	ZW10	ZWINT	psi-mi:MI:0096(pull down)
O43264	O95229	ZW10	ZWINT	psi-mi:MI:0096(pull down)
O43264	Q9H900	ZW10	ZWILCH	psi-mi:MI:0006(anti bait coimmunoprecipitation)
O43264	Q9H900	ZW10	ZWILCH	psi-mi:MI:0006(anti bait coimmunoprecipitation)
O43264	Q9H900	ZW10	ZWILCH	psi-mi:MI:0006(anti bait coimmunoprecipitation)
O43264	Q9H900	ZW10	ZWILCH	psi-mi:MI:0006(anti bait coimmunoprecipitation)
O43264	Q9H900	ZW10	ZWILCH	psi-mi:MI:0007(anti tag coimmunoprecipitation)
O43264	Q9H900	ZW10	ZWILCH	psi-mi:MI:0007(anti tag coimmunoprecipitation)
O43264	Q9H900	ZW10	ZWILCH	psi-mi:MI:0676(tandem affinity purification)
O43264	Q9H900	ZW10	ZWILCH	psi-mi:MI:0676(tandem affinity purification)
O43264	P35606	ZW10	COPB2	psi-mi:MI:0006(anti bait coimmunoprecipitation)
O43264	P35606	ZW10	COPB2	psi-mi:MI:0006(anti bait coimmunoprecipitation)
O43264	P35606	ZW10	COPB2	psi-mi:MI:0006(anti bait coimmunoprecipitation)
O43264	P35606	ZW10	COPB2	psi-mi:MI:0006(anti bait coimmunoprecipitation)
O43264	O75365	ZW10	PTP4A3	psi-mi:MI:0006(anti bait coimmunoprecipitation)
O43264	O75365	ZW10	PTP4A3	psi-mi:MI:0006(anti bait coimmunoprecipitation)
O43264	Q15714	ZW10	TSC22D1	psi-mi:MI:0006(anti bait coimmunoprecipitation)
O43264	Q15714	ZW10	TSC22D1	psi-mi:MI:0006(anti bait coimmunoprecipitation)
O43264	Q9Y5J5	ZW10	PHLDA3	psi-mi:MI:0006(anti bait coimmunoprecipitation)
O43264	Q9Y5J5	ZW10	PHLDA3	psi-mi:MI:0006(anti bait coimmunoprecipitation)
O43264	Q6NUQ1	ZW10	RINT1	psi-mi:MI:0006(anti bait coimmunoprecipitation)
O43264	Q6NUQ1	ZW10	RINT1	psi-mi:MI:0006(anti bait coimmunoprecipitation)
O43264	Q6NUQ1	ZW10	RINT1	psi-mi:MI:0006(anti bait coimmunoprecipitation)
O43264	Q6NUQ1	ZW10	RINT1	psi-mi:MI:0006(anti bait coimmunoprecipitation)
O43264	Q6NUQ1	ZW10	RINT1	psi-mi:MI:0006(anti bait coimmunoprecipitation)
O43264	Q6NUQ1	ZW10	RINT1	psi-mi:MI:0006(anti bait coimmunoprecipitation)
O43264	Q6NUQ1	ZW10	RINT1	psi-mi:MI:0006(anti bait coimmunoprecipitation)
O43264	Q6NUQ1	ZW10	RINT1	psi-mi:MI:0006(anti bait coimmunoprecipitation)
O43264	Q6NUQ1	ZW10	RINT1	psi-mi:MI:0007(anti tag coimmunoprecipitation)
O43264	Q6NUQ1	ZW10	RINT1	psi-mi:MI:0007(anti tag coimmunoprecipitation)
O43264	Q6NUQ1	ZW10	RINT1	psi-mi:MI:0096(pull down)
O43264	Q6NUQ1	ZW10	RINT1	psi-mi:MI:0096(pull down)
O43264	Q6NUQ1	ZW10	RINT1	psi-mi:MI:0676(tandem affinity purification)
O43264	Q6NUQ1	ZW10	RINT1	psi-mi:MI:0676(tandem affinity purification)
O43264	A2RRP1	ZW10	NBAS	psi-mi:MI:0006(anti bait coimmunoprecipitation)
O43264	A2RRP1	ZW10	NBAS	psi-mi:MI:0006(anti bait coimmunoprecipitation)
O43264	A2RRP1	ZW10	NBAS	psi-mi:MI:0006(anti bait coimmunoprecipitation)
O43264	A2RRP1	ZW10	NBAS	psi-mi:MI:0006(anti bait coimmunoprecipitation)
O43264	A2RRP1	ZW10	NBAS	psi-mi:MI:0006(anti bait coimmunoprecipitation)
O43264	A2RRP1	ZW10	NBAS	psi-mi:MI:0006(anti bait coimmunoprecipitation)
O43264	A2RRP1	ZW10	NBAS	psi-mi:MI:0006(anti bait coimmunoprecipitation)
O43264	A2RRP1	ZW10	NBAS	psi-mi:MI:0006(anti bait coimmunoprecipitation)
O43264	A2RRP1	ZW10	NBAS	psi-mi:MI:0007(anti tag coimmunoprecipitation)
O43264	A2RRP1	ZW10	NBAS	psi-mi:MI:0007(anti tag coimmunoprecipitation)
O43264	Q9Y2Q3	ZW10	GSTK1	psi-mi:MI:0006(anti bait coimmunoprecipitation)
O43264	Q9Y2Q3	ZW10	GSTK1	psi-mi:MI:0006(anti bait coimmunoprecipitation)
O43264	Q9P2W9	ZW10	STX18	psi-mi:MI:0006(anti bait coimmunoprecipitation)
O43264	Q9P2W9	ZW10	STX18	psi-mi:MI:0006(anti bait coimmunoprecipitation)
O43264	Q9HAW0	ZW10	BRF2	psi-mi:MI:0006(anti bait coimmunoprecipitation)
O43264	Q9HAW0	ZW10	BRF2	psi-mi:MI:0006(anti bait coimmunoprecipitation)
O43264	Q9UFG5	ZW10	C19orf25	psi-mi:MI:0676(tandem affinity purification)
O43264	Q9UFG5	ZW10	C19orf25	psi-mi:MI:0676(tandem affinity purification)
O95229	Q8NG31	ZWINT	KNL1	psi-mi:MI:0007(anti tag coimmunoprecipitation)
O95229	Q8NG31	ZWINT	KNL1	psi-mi:MI:0676(tandem affinity purification)
O95229	O15511	ZWINT	ARPC5	psi-mi:MI:0007(anti tag coimmunoprecipitation)
O95229	A7KAX9	ZWINT	ARHGAP32	psi-mi:MI:0007(anti tag coimmunoprecipitation)
O95229	Q9UHR4	ZWINT	BAIAP2L1	psi-mi:MI:0007(anti tag coimmunoprecipitation)
O95229	O60566	ZWINT	BUB1B	psi-mi:MI:0676(tandem affinity purification)
O95229	Q92572	ZWINT	AP3S1	psi-mi:MI:0007(anti tag coimmunoprecipitation)
O95229	Q13277	ZWINT	STX3	psi-mi:MI:0007(anti tag coimmunoprecipitation)
O95229	O95721	ZWINT	SNAP29	psi-mi:MI:0676(tandem affinity purification)
O95229	Q14457	ZWINT	BECN1	psi-mi:MI:0006(anti bait coimmunoprecipitation)
O95229	Q14457	ZWINT	BECN1	psi-mi:MI:0006(anti bait coimmunoprecipitation)
O95229	Q14457	ZWINT	BECN1	psi-mi:MI:0096(pull down)
O95229	Q14457	ZWINT	BECN1	psi-mi:MI:0096(pull down)
O95229	Q9H410	ZWINT	DSN1	psi-mi:MI:0007(anti tag coimmunoprecipitation)
O95229	Q9H410	ZWINT	DSN1	psi-mi:MI:0676(tandem affinity purification)
O95229	Q9H410	ZWINT	DSN1	psi-mi:MI:0676(tandem affinity purification)
O95229	Q5JTD0	ZWINT	TJAP1	psi-mi:MI:0007(anti tag coimmunoprecipitation)
O95229	P09651	ZWINT	HNRNPA1	psi-mi:MI:0007(anti tag coimmunoprecipitation)
O95229	P31943	ZWINT	HNRNPH1	psi-mi:MI:0676(tandem affinity purification)
O95229	P52597	ZWINT	HNRNPF	psi-mi:MI:0676(tandem affinity purification)
O95229	P17844	ZWINT	DDX5	psi-mi:MI:0676(tandem affinity purification)
O95229	C9JA28	ZWINT	SSR3	psi-mi:MI:0007(anti tag coimmunoprecipitation)
O95229	Q5U651	ZWINT	RASIP1	psi-mi:MI:0007(anti tag coimmunoprecipitation)
O95229	O15182	ZWINT	CETN3	psi-mi:MI:0676(tandem affinity purification)
O95229	O14777	ZWINT	NDC80	psi-mi:MI:0006(anti bait coimmunoprecipitation)
O95229	O14777	ZWINT	NDC80	psi-mi:MI:0006(anti bait coimmunoprecipitation)
O95229	O14777	ZWINT	NDC80	psi-mi:MI:0006(anti bait coimmunoprecipitation)
O95229	O14777	ZWINT	NDC80	psi-mi:MI:0006(anti bait coimmunoprecipitation)
O95229	O14777	ZWINT	NDC80	psi-mi:MI:0007(anti tag coimmunoprecipitation)
O95229	O14777	ZWINT	NDC80	psi-mi:MI:0007(anti tag coimmunoprecipitation)
O95229	O14777	ZWINT	NDC80	psi-mi:MI:0096(pull down)
O95229	O14777	ZWINT	NDC80	psi-mi:MI:0096(pull down)
O95229	O14777	ZWINT	NDC80	psi-mi:MI:0096(pull down)
O95229	O14777	ZWINT	NDC80	psi-mi:MI:0096(pull down)
O95229	O14777	ZWINT	NDC80	psi-mi:MI:0676(tandem affinity purification)
O95229	O14777	ZWINT	NDC80	psi-mi:MI:0676(tandem affinity purification)
O95229	O14777	ZWINT	NDC80	psi-mi:MI:0676(tandem affinity purification)
O95229	O14777	ZWINT	NDC80	psi-mi:MI:0676(tandem affinity purification)
O95229	Q3YEC7	ZWINT	RABL6	psi-mi:MI:0007(anti tag coimmunoprecipitation)
O95229	Q9BVG8	ZWINT	KIFC3	psi-mi:MI:0007(anti tag coimmunoprecipitation)
O95229	Q13263	ZWINT	TRIM28	psi-mi:MI:0676(tandem affinity purification)
O95229	Q96GD3	ZWINT	SCMH1	psi-mi:MI:0007(anti tag coimmunoprecipitation)
O95229	Q9BZD4	ZWINT	NUF2	psi-mi:MI:0007(anti tag coimmunoprecipitation)
O95229	Q9BZD4	ZWINT	NUF2	psi-mi:MI:0676(tandem affinity purification)
O95229	Q03188	ZWINT	CENPC	psi-mi:MI:0676(tandem affinity purification)
O95229	P08123	ZWINT	COL1A2	psi-mi:MI:0007(anti tag coimmunoprecipitation)
O95229	O00622	ZWINT	CYR61	psi-mi:MI:0676(tandem affinity purification)
O95229	O43683	ZWINT	BUB1	psi-mi:MI:0007(anti tag coimmunoprecipitation)
O95229	O43683	ZWINT	BUB1	psi-mi:MI:0676(tandem affinity purification)
O95229	O95229	ZWINT	ZWINT	psi-mi:MI:0676(tandem affinity purification)
O95229	O95229	ZWINT	ZWINT	psi-mi:MI:0676(tandem affinity purification)
O95229	O43264	ZWINT	ZW10	psi-mi:MI:0096(pull down)
O95229	O43264	ZWINT	ZW10	psi-mi:MI:0096(pull down)
O95229	Q6P1K2	ZWINT	PMF1	psi-mi:MI:0007(anti tag coimmunoprecipitation)
O95229	Q6P1K2	ZWINT	PMF1	psi-mi:MI:0676(tandem affinity purification)
O95229	Q6P1K2	ZWINT	PMF1	psi-mi:MI:0676(tandem affinity purification)
O95229	Q9H081	ZWINT	MIS12	psi-mi:MI:0007(anti tag coimmunoprecipitation)
O95229	Q9H081	ZWINT	MIS12	psi-mi:MI:0676(tandem affinity purification)
O95229	Q9H081	ZWINT	MIS12	psi-mi:MI:0676(tandem affinity purification)
O95229	Q96IY1	ZWINT	NSL1	psi-mi:MI:0007(anti tag coimmunoprecipitation)
O95229	Q96IY1	ZWINT	NSL1	psi-mi:MI:0676(tandem affinity purification)
O95229	Q8NBT2	ZWINT	SPC24	psi-mi:MI:0007(anti tag coimmunoprecipitation)
O95229	Q8NBT2	ZWINT	SPC24	psi-mi:MI:0676(tandem affinity purification)
O95229	Q8NBT2	ZWINT	SPC24	psi-mi:MI:0676(tandem affinity purification)
O95229	Q9HBM1	ZWINT	SPC25	psi-mi:MI:0007(anti tag coimmunoprecipitation)
O95229	Q9HBM1	ZWINT	SPC25	psi-mi:MI:0676(tandem affinity purification)
O95229	Q9HCJ5	ZWINT	ZSWIM6	psi-mi:MI:0007(anti tag coimmunoprecipitation)
O95229	Q6IPR3	ZWINT	TYW3	psi-mi:MI:0007(anti tag coimmunoprecipitation)
O95229	Q13671	ZWINT	RIN1	psi-mi:MI:0007(anti tag coimmunoprecipitation)
O95229	Q9NR50	ZWINT	EIF2B3	psi-mi:MI:0007(anti tag coimmunoprecipitation)
O95229	Q9NYL2	ZWINT	MAP3K20	psi-mi:MI:0007(anti tag coimmunoprecipitation)
O95229	Q9C035	ZWINT	TRIM5	psi-mi:MI:0676(tandem affinity purification)
O95229	P42167	ZWINT	TMPO	psi-mi:MI:0007(anti tag coimmunoprecipitation)
O95229	Q99081	ZWINT	TCF12	psi-mi:MI:0007(anti tag coimmunoprecipitation)
O95229	Q8TEX9	ZWINT	IPO4	psi-mi:MI:0007(anti tag coimmunoprecipitation)
O95229	Q8WYQ5	ZWINT	DGCR8	psi-mi:MI:0007(anti tag coimmunoprecipitation)
O95229	P49756	ZWINT	RBM25	psi-mi:MI:0007(anti tag coimmunoprecipitation)
O95229	Q9HCM4	ZWINT	EPB41L5	psi-mi:MI:0007(anti tag coimmunoprecipitation)
O95229	P62633	ZWINT	CNBP	psi-mi:MI:0676(tandem affinity purification)
O95229	Q92841	ZWINT	DDX17	psi-mi:MI:0676(tandem affinity purification)
O95229	Q15293	ZWINT	RCN1	psi-mi:MI:0676(tandem affinity purification)
O95229	Q9P2E9	ZWINT	RRBP1	psi-mi:MI:0676(tandem affinity purification)
O95229	Q8NHP8	ZWINT	PLBD2	psi-mi:MI:0007(anti tag coimmunoprecipitation)
O95229	Q9H061	ZWINT	TMEM126A	psi-mi:MI:0007(anti tag coimmunoprecipitation)
O95229	Q16514	ZWINT	TAF12	psi-mi:MI:0007(anti tag coimmunoprecipitation)
O95229	Q8IWZ8	ZWINT	SUGP1	psi-mi:MI:0007(anti tag coimmunoprecipitation)
O95229	Q9Y6N5	ZWINT	SQOR	psi-mi:MI:0007(anti tag coimmunoprecipitation)
O95229	K7EJH0	ZWINT	SPC24	psi-mi:MI:0007(anti tag coimmunoprecipitation)
O95229	Q9HC21	ZWINT	SLC25A19	psi-mi:MI:0007(anti tag coimmunoprecipitation)
O95229	Q9H2U2	ZWINT	PPA2	psi-mi:MI:0007(anti tag coimmunoprecipitation)
O95229	O75448	ZWINT	MED24	psi-mi:MI:0007(anti tag coimmunoprecipitation)
O95229	Q96PV6	ZWINT	LENG8	psi-mi:MI:0007(anti tag coimmunoprecipitation)
O95229	F5H6C2	ZWINT	IFT88	psi-mi:MI:0007(anti tag coimmunoprecipitation)
O95229	Q6PII3	ZWINT	CCDC174	psi-mi:MI:0007(anti tag coimmunoprecipitation)
O95229	Q2TB18	ZWINT	ASTE1	psi-mi:MI:0007(anti tag coimmunoprecipitation)
O95229	Q8IWY7	ZWINT	TTBK2	psi-mi:MI:0676(tandem affinity purification)
O95229	P20700	ZWINT	LMNB1	psi-mi:MI:0676(tandem affinity purification)
O95229	Q05C46	ZWINT	CASC5	psi-mi:MI:0676(tandem affinity purification)
